# Supplementary material for: Label-Free Comparative Proteomics Analysis Revealed Heat Stress Responsive Mechanism in Hypsizygus marmoreus
Source: Front Microbiol. 2021 Jan 5;11:541967. doi: 10.3389/fmicb.2020.541967 (PMC7813762; doi:10.3389/fmicb.2020.541967)
Supplement: Supplementary file 1 [file Data_Sheet_1.xlsx]

## Sheet: Data Sheet
Supplementary Table 1 Normalized abundance of proteomics samples from Con group, HS group and RHS group
UniProt ID	Control group				Heat shock group				Recovery growth group
	Con1	Con2	Con3	Con4	HS1	HS2	HS3	HS4	RHS1	RHS2	RHS3	RHS4
A0A369JGW2	0.203604	0.00436453	0.681302	0.157052	0.407983	0.421795	0.348339	0.392944	2.67	1.38873	1.83896	1.60035
A0A369K9Z7	0.0700417	0.0115921	0.00814674	0.0365003	0.0430352	0.0289645	0.000738667	0.00111398	0.0147406	0.204934	0.207866	0.223736
A0A369KAS1	0.0140187	0.012761	0.0189227	0.0174568	0.165241	0.178915	0.151309	0.177137	0.0212615	0.124119	0.0995453	0.0153542
A0A369K904	0.0363604	0.0181109	0.0117379	0.0314469	0.0221054	0.000997119	0.000430948	0.0200706	0.116868	0.105946	0.141316	0.182475
A0A369JSS7	0.0150315	0.0185033	0.00957837	0.0273038	0.547263	0.585656	0.4456	0.569207	NA	NA	NA	NA
A0A369KAA9	0.10949	0.0281726	0.43878	0.595582	5.82675	6.80517	6.01966	5.57684	0.070791	0.520858	0.512981	0.406232
A0A369JVV2	0.0186944	0.0284976	0.0269225	0.0214543	0.058712	0.0641134	0.04731	0.0500668	0.0141553	0.0149514	0.149771	0.00845785
A0A369KC56	0.0436802	0.0285644	0.00752112	0.0217556	0.922256	0.844395	0.923734	0.85321	0.0905666	0.104514	0.0871776	0.0518211
A0A369JUQ7	0.0202191	0.0292536	0.0201014	0.0393522	0.551757	0.443256	0.583868	0.646231	0.0397226	0.06388	0.152184	0.00946527
A0A369KD25	0.0256425	0.0293806	0.0400498	0.0640118	1.09912	1.16757	0.968605	0.931651	NA	NA	NA	NA
A0A369K5V5	0.333339	0.0325296	0.441411	0.247888	0.999222	1.09185	0.787913	0.851403	0.345917	0.375302	0.0945396	0.556277
A0A369JQ26	0.105355	0.037469	0.0455516	0.20605	0.28166	0.199121	0.143178	0.333909	0.34631	0.156403	0.37552	0.356291
A0A369K0H7	0.0913156	0.0396776	0.0481457	0.120857	0.246168	0.228218	0.222754	0.266103	0.0963975	0.170685	0.151255	0.103593
A0A369JTM4	0.0808458	0.0456259	0.0629101	0.0748257	NA	NA	NA	NA	0.0604245	0.0592712	0.0608472	0.0275649
A0A369JHH6	0.0482218	0.0480621	0.204514	0.0290481	0.289942	0.697641	0.296541	0.482903	1.01118	1.21758	1.04217	0.919945
A0A369K4D4	0.0648166	0.0533823	0.0736614	0.0553601	0.0424315	0.0540091	0.0484759	0.0547455	0.0986393	0.104076	0.0851739	0.0481375
A0A369JLR0	0.0415525	0.0549179	0.0429711	0.0462363	0.102219	0.170127	0.144904	0.119783	0.0377746	0.0310245	0.020753	0.0170913
A0A369KF63	1.0416	0.0552698	1.07469	0.224532	0.0844904	0.123654	0.0845612	0.0830295	1.12017	1.09332	1.03364	1.14669
A0A369K658	0.0716754	0.0555829	0.173365	0.0408596	0.343704	0.382307	0.31207	0.823935	0.0576713	0.0738203	0.169909	0.0533931
A0A369JX34	0.0881944	0.0581354	0.116361	0.0832063	0.0860384	0.118407	0.10711	0.101829	0.275287	0.36969	0.321175	0.30454
A0A369JTQ2	0.101907	0.0583389	0.0566777	0.0591863	NA	NA	NA	NA	0.197152	0.204978	0.123121	0.130097
A0A369K6L0	0.644979	0.0614716	0.965069	0.512062	1.55185	1.31696	1.64309	1.37825	0.161899	0.106575	0.121821	0.137035
A0A369JFW8	0.417865	0.0615424	0.334341	0.403481	5.30546	5.34963	6.20543	4.37268	2.55246	2.44182	2.3826	2.02509
A0A369J196	0.083393	0.0634485	0.170479	0.0395474	1.37263	1.27249	1.32576	1.36709	0.0714865	0.0599842	0.140996	0.0937074
A0A369JPV3	0.0570892	0.0634682	0.0834358	0.0632548	NA	NA	NA	NA	0.033811	0.171967	0.0959024	0.0479822
A0A369JLU7	0.0547374	0.0655849	0.0900756	0.171994	2.13622	2.58171	2.31302	3.00495	0.131273	0.151997	0.174781	0.131906
A0A369J837	0.0723498	0.0659759	0.168354	0.0844343	8.14827	6.78128	7.82874	8.14034	0.0942797	0.238517	0.115778	0.0373793
A0A369K4P6	0.0606702	0.0662141	0.0793226	0.0603675	NA	NA	NA	NA	0.190961	0.160928	0.121814	0.120888
A0A369JI43	0.0656781	0.0682261	0.0749965	0.0949418	NA	NA	NA	NA	0.124267	0.101035	0.108974	0.0914018
A0A369JM09	0.0758397	0.0693985	0.108709	0.0913566	0.44356	0.438917	0.464417	0.496105	0.0232883	0.0820992	0.0267782	0.018837
A0A369KC06	0.0792952	0.0699703	0.0394251	0.0932907	NA	NA	NA	NA	0.0588175	0.0505977	0.0638564	0.0424752
A0A369K701	0.00142968	0.0713947	0.0873559	0.178678	1.46122	1.40433	1.40378	1.25641	0.20801	0.200548	0.296605	0.4252
A0A369K1K3	0.0718923	0.0715087	0.0500956	0.0763353	NA	NA	NA	NA	0.213731	0.194249	0.195772	0.223244
A0A369J9X3	0.183966	0.0717621	0.160775	0.255271	3.754	4.95356	3.39849	3.50436	NA	NA	NA	NA
A0A369K5V4	0.0824055	0.0736931	0.13311	0.0998286	0.61226	0.455852	0.50398	0.562812	0.199813	0.174487	0.124529	0.124897
A0A369K9R4	0.0480233	0.0748256	0.0445611	0.0751544	0.0802943	0.133348	0.0663919	0.147974	NA	NA	NA	NA
A0A369JRX7	0.170052	0.0750198	0.502358	0.446586	1.80676	1.66199	1.50805	1.6532	0.120051	0.325742	0.290772	0.262995
A0A369K8F9	0.292861	0.0785255	0.268184	0.0985322	2.21715	2.13535	2.21241	2.1325	0.362146	0.208267	0.163375	0.157229
A0A369K9T1	0.0685207	0.0801223	0.159603	0.162293	0.161899	0.242402	0.316022	0.365319	0.122136	0.105063	0.0779292	0.144521
A0A369JMX5	0.215556	0.0815269	0.144434	0.223151	0.440148	0.427041	0.537241	0.54421	NA	NA	NA	NA
A0A369J625	0.0993065	0.0842464	0.18397	0.547559	0.334254	0.402958	0.460952	0.336978	0.575044	0.72444	0.788231	0.642678
A0A369KBI6	0.095214	0.085474	0.149721	0.0760765	1.27696	1.43568	1.28838	1.25604	0.303354	0.369058	0.370992	0.230826
A0A369JJD7	0.099963	0.0871848	0.12753	0.0906859	NA	NA	NA	NA	0.451299	0.400095	0.487515	0.248616
A0A369JZL6	0.139068	0.0872016	0.138222	0.152633	10.2977	11.4187	11.3088	9.34487	1.17382	1.53173	1.12167	1.09526
A0A369JYH5	0.0770779	0.0887423	0.113464	0.0841628	0.802101	0.960999	0.642542	0.793913	NA	NA	NA	NA
A0A369J6R9	0.105505	0.089825	0.138555	0.162716	0.0539629	0.0552657	0.0396098	0.0383252	NA	NA	NA	NA
A0A369K4X6	0.107951	0.0926158	0.0383072	0.0964917	0.0461548	0.0705702	0.0805882	0.0579537	0.187575	0.202795	0.252931	0.157388
A0A369J0X4	0.098447	0.0935961	0.0944567	0.106147	NA	NA	NA	NA	0.0605101	0.0851992	0.0625707	0.0480328
A0A369K254	0.177885	0.0944712	0.434863	0.213893	0.591513	0.465301	0.510171	0.603417	0.0936214	0.0963044	0.215567	0.0575121
A0A369KH81	0.156717	0.0953341	0.194069	0.137525	2.11027	2.43898	1.98431	1.82253	0.309104	0.239574	0.316361	0.402754
A0A369KCE2	0.0998979	0.0960039	0.108439	0.0791813	1.93584	1.95778	2.02378	2.00847	0.116874	0.1179	0.10265	0.0778517
A0A369JZ90	0.10834	0.0964135	0.302994	0.141684	0.127814	2.35075	2.29834	2.34492	0.275517	0.223512	0.148314	0.175191
A0A369JUL5	0.104812	0.097556	0.0961548	0.0921941	0.281743	0.367711	0.348895	0.388594	0.130118	0.129017	0.113473	0.130849
A0A369JH87	0.103639	0.0979252	0.142712	0.175253	1.05319	1.12491	0.794854	0.900001	NA	NA	NA	NA
A0A369J5D4	0.106516	0.0988269	0.135518	0.0890525	3.86938	3.64131	3.66272	4.30274	0.0768586	0.355264	0.328675	0.250556
A0A369JXH4	0.200897	0.0992606	0.136998	0.127531	0.33157	0.34611	0.276405	0.131497	0.310875	0.170215	0.390988	0.125269
A0A369JXB0	0.0938043	0.0993396	0.096867	0.06748	NA	NA	NA	NA	0.161433	0.167336	0.106627	0.108567
A0A369JZX9	0.150536	0.099535	0.170916	0.186765	0.227427	0.115967	0.630081	0.334898	0.157152	0.184383	0.275154	0.202079
A0A369KAB6	0.109731	0.100127	0.166109	0.143471	0.386455	0.0925361	0.386242	0.423914	0.144585	0.261527	0.188031	0.198399
A0A369K6M0	0.10958	0.1009	0.124146	0.087782	0.586087	0.481087	0.530364	0.523909	NA	NA	NA	NA
A0A369JR22	0.17427	0.10097	0.133313	0.145684	NA	NA	NA	NA	0.760635	0.910995	0.886522	1
A0A369KAC0	0.102586	0.101634	0.0961548	0.0922755	0.112549	0.138444	0.134671	0.149072	0.184894	0.159649	0.155607	0.141323
A0A369JGM8	0.104938	0.103089	0.089205	0.516097	0.819412	1.17591	0.715397	1.05081	0.1861	0.176919	0.716047	0.15802
A0A369K889	0.112564	0.106382	0.12119	0.127738	0.175519	0.256505	0.166421	0.160611	NA	NA	NA	NA
A0A369J7V4	0.0888366	0.106835	0.279239	0.266297	0.871312	0.521671	0.570213	0.849942	NA	NA	NA	NA
A0A369JKU5	0.879721	0.106965	1.00191	0.721763	5.69917	6.63227	6.35662	6.6651	NA	NA	NA	NA
A0A369J5I4	0.135531	0.107648	0.178215	0.0978478	NA	NA	NA	NA	NA	NA	NA	NA
A0A369JMH7	0.116163	0.10991	0.75189	0.789039	NA	NA	NA	NA	1.65761	1.92152	1.70913	1.88546
A0A369JAG4	0.110583	0.11154	0.149808	0.17117	9.14047	8.85526	9.56765	8.13364	0.338513	0.524927	0.307266	0.237875
A0A369JKU7	0.155227	0.11266	0.055968	0.142387	NA	NA	NA	NA	0.0492107	0.0514681	0.0430285	0.0342866
A0A369J8K6	0.707197	0.113221	0.64469	0.743276	NA	NA	NA	NA	1.6036	1.65683	1.29109	2.05352
A0A369JD49	0.10858	0.11352	0.186633	0.111435	3.20448	2.32762	2.16099	2.87313	0.193952	0.198329	0.390435	0.52806
A0A369JVT3	0.504054	0.115159	0.397528	0.23446	1.24894	1.35932	0.918525	1.07717	NA	NA	NA	NA
A0A369K5S6	0.104418	0.115167	0.310772	0.276258	2.58138	1.60497	3.06817	2.49406	0.604859	0.66769	0.824898	0.94999
A0A369K6R3	0.115915	0.117694	0.213906	0.111387	NA	NA	NA	NA	0.10711	0.0893085	0.103216	0.089378
A0A369K662	0.120561	0.11812	0.18078	0.0962948	0.142754	0.108837	0.137481	0.108619	0.0827733	0.203008	0.120163	0.0928599
A0A369JG58	0.0912257	0.118916	0.106591	0.143265	0.642787	0.316931	0.283522	0.0653179	0.248907	0.265895	0.383021	0.167382
A0A369IXT8	0.201936	0.120193	0.186068	0.181481	NA	NA	NA	NA	0.237607	0.227551	0.266083	0.256078
A0A369J5V7	0.123128	0.120285	0.282032	0.157664	NA	NA	NA	NA	0.112538	0.149169	0.152773	0.112414
A0A369JTW2	0.130749	0.120839	0.14087	0.12024	NA	NA	NA	NA	NA	NA	NA	NA
A0A369JA34	0.170364	0.120934	0.130267	0.146849	0.725995	0.632646	0.692426	0.550077	0.266925	0.184019	0.190407	0.158501
A0A369JM51	0.135042	0.121478	0.110157	0.132255	NA	NA	NA	NA	0.0990128	0.0947383	0.0917266	0.088535
A0A369K1T9	0.175694	0.122128	0.187752	0.153454	NA	NA	NA	NA	0.266407	0.207583	0.272652	0.138286
A0A369JZK2	0.150844	0.123125	0.168833	0.126393	NA	NA	NA	NA	0.203895	0.212158	0.253419	0.239948
A0A369J4A2	0.228207	0.124175	0.220405	0.207655	0.0694721	0.0982048	0.118687	0.0834994	0.41838	0.462143	0.48366	0.597153
A0A369J9U8	0.0911188	0.124206	0.138249	0.119332	1.64753	1.62731	1.27706	1.4338	1.6845	1.27657	1.28964	1.2866
A0A369JFI2	0.139454	0.125005	0.17443	0.159653	NA	NA	NA	NA	0.132311	0.416194	0.735634	0.420256
A0A369JFD6	0.135907	0.125325	0.192243	0.162904	0.728269	0.328144	0.231235	0.523711	0.2057	0.239605	0.318911	0.279303
A0A369JU88	0.0985335	0.12726	0.113822	0.0936146	0.943353	0.949695	11.677	0.672642	0.0963238	0.0562199	0.0561185	0.0829603
A0A369K137	0.236648	0.129257	0.11736	0.144243	0.528977	0.693788	0.837547	0.390175	NA	NA	NA	NA
A0A369J780	0.150874	0.129304	0.118864	0.122064	2.08588	1.14709	0.825747	0.878324	NA	NA	NA	NA
A0A369JS76	0.278638	0.130071	0.338238	0.243824	0.1206	0.131653	0.133585	0.185881	NA	NA	NA	NA
A0A369IZN7	0.162768	0.13048	0.11264	0.251025	2.26839	2.30197	2.24942	1.56676	0.0467884	0.0879874	0.08686	0.0834504
A0A369K4E4	0.187307	0.131599	0.195908	0.175751	0.281103	0.139162	0.231073	0.233608	0.51513	0.474539	0.479246	0.639828
A0A369KAV1	0.120446	0.132157	0.130242	0.0997125	NA	NA	NA	NA	NA	NA	NA	NA
A0A369JUV2	0.191229	0.132321	0.235735	0.172562	NA	NA	NA	NA	0.378161	0.726565	0.144296	0.754272
A0A369JNQ6	0.157162	0.133025	0.20765	0.157872	0.194306	0.285512	0.517829	0.234721	0.242313	0.192332	0.281921	0.0710096
A0A369K935	0.188271	0.133071	0.180305	0.135937	NA	NA	NA	NA	0.33626	0.423835	0.300862	0.30093
A0A369JBD9	0.197804	0.138912	0.185351	0.163831	1.26443	1.19865	1.04738	1.30815	0.314068	0.265325	0.214948	0.427851
A0A369JB50	0.243157	0.139171	0.223748	0.243096	NA	NA	NA	NA	NA	NA	NA	NA
A0A369J775	0.0927232	0.140782	0.0957906	0.144951	0.254582	0.160704	0.146029	0.163117	NA	NA	NA	NA
A0A369KDD1	0.166564	0.14214	0.158827	0.158899	NA	NA	NA	NA	NA	NA	NA	NA
A0A369KFC5	0.135836	0.142802	0.0944466	0.145748	NA	NA	NA	NA	NA	NA	NA	NA
A0A369K6S2	0.161729	0.143298	0.422359	0.149202	0.602841	0.153599	0.560595	0.557884	1.01755	0.961391	0.94991	1.19508
A0A369IYW8	0.162968	0.143818	0.215569	0.172112	NA	NA	NA	NA	0.117992	0.21107	0.170612	0.168057
A0A369K0T9	0.133473	0.143924	0.223318	0.127845	0.541323	0.853601	0.91131	0.896769	NA	NA	NA	NA
A0A369JZN7	0.100598	0.146157	0.183295	0.300815	3.32605	2.694	2.64751	2.87703	1.0482	0.851039	1.57285	0.969601
A0A369JBT2	0.151183	0.148404	0.106803	0.14341	0.0879064	0.157668	0.126673	0.106273	NA	NA	NA	NA
A0A369JEU3	0.132701	0.149629	0.143232	0.161459	NA	NA	NA	NA	0.15658	0.145901	0.118122	0.144586
A0A369K5E1	0.247258	0.150487	0.233937	0.172534	NA	NA	NA	NA	0.168685	0.122387	0.127256	0.115282
A0A369K0S3	0.132412	0.150913	0.124695	0.141176	0.103831	0.14642	0.370175	0.0787053	NA	NA	NA	NA
A0A369J9P0	0.124633	0.151162	0.148165	0.165382	0.0988046	0.0991415	0.09915	0.115384	0.112271	0.127023	0.154362	0.115036
A0A369JBY1	0.16125	0.152053	0.106937	0.115324	0.238343	0.340718	0.546468	0.508028	0.226988	0.204614	0.197967	0.215566
A0A369J8G8	0.136815	0.152064	0.124541	0.0666193	NA	NA	NA	NA	1.70785	0.172036	1.52406	0.203414
A0A369JFM9	0.166263	0.15342	0.271319	0.162702	35.1975	34.3346	32.4718	37.5471	NA	NA	NA	NA
A0A369KDV1	0.228144	0.153872	0.172601	0.183386	NA	NA	NA	NA	0.121518	0.152759	0.12156	0.138804
A0A369JX48	0.233694	0.154984	0.0925169	0.145521	NA	NA	NA	NA	0.479908	0.579368	0.623659	0.507895
A0A369JP74	0.333521	0.155075	0.444609	0.198478	0.273605	0.280174	0.316681	0.309192	0.733437	0.74235	0.715908	0.851588
A0A369JVB1	0.29043	0.157339	0.194335	0.158726	NA	NA	NA	NA	0.264296	0.329721	0.63423	0.442419
A0A369JH43	0.15496	0.157454	0.181211	0.140964	0.637456	0.555349	0.691891	0.789281	0.130743	0.166429	0.156922	0.0468893
A0A369JK95	0.0986823	0.157945	0.0804155	0.141981	NA	NA	NA	NA	0.53402	0.553256	0.445093	0.4015
A0A369JBJ0	0.156551	0.159906	0.198165	0.215955	NA	NA	NA	NA	0.840575	0.387857	0.637002	0.506747
A0A369JYP8	0.138264	0.16021	0.223283	0.156513	0.879702	1.02761	1.09848	0.837365	NA	NA	NA	NA
A0A369K287	0.190902	0.160653	0.208732	0.153696	3.89382	3.57695	3.87058	4.10079	NA	NA	NA	NA
A0A369JUV3	1.0044	0.161058	0.646393	0.26112	9.22316	9.22796	9.10059	10.0163	0.419835	0.657665	0.497622	0.551614
A0A369J5C4	0.124788	0.161261	0.106424	0.153793	0.0696932	0.113744	0.236296	0.113156	NA	NA	NA	NA
A0A369JQH5	0.149524	0.161683	0.127004	0.289192	NA	NA	NA	NA	0.254799	0.227331	0.181938	0.262953
A0A369JZJ9	0.188033	0.161784	0.193517	0.215928	NA	NA	NA	NA	0.268617	0.273146	0.286279	0.331461
A0A369JNT5	0.162841	0.162245	0.147133	0.135702	NA	NA	NA	NA	0.23566	0.267576	0.212261	0.31517
A0A369K2J5	0.166562	0.162909	0.112509	0.142738	NA	NA	NA	NA	0.0897367	0.0864862	0.0655992	0.0479486
A0A369J8L3	0.187919	0.163052	0.269749	0.163203	NA	NA	NA	NA	0.227808	0.209236	0.233838	0.336296
A0A369JA64	0.220987	0.163964	0.343897	0.245455	NA	NA	NA	NA	0.378147	0.462464	0.539048	0.37184
A0A369JD35	0.140814	0.164023	0.158223	0.106864	0.186628	0.124691	0.122891	0.119429	NA	NA	NA	NA
A0A369J6L0	0.145765	0.164879	0.231406	0.187098	NA	NA	NA	NA	0.566685	0.629333	0.7155	0.481069
A0A369JC56	0.13342	0.165042	0.217457	0.168693	0.517398	0.431002	0.546106	0.494542	0.1937	0.234974	0.181704	0.119549
A0A369KAT8	0.533412	0.165389	0.44003	0.366138	0.179775	0.136214	0.173117	0.180038	0.126284	0.139296	0.141288	0.149545
A0A369JEX3	0.151949	0.166987	0.121152	0.088609	9.31707	9.88176	9.27656	9.53223	0.203442	0.310105	0.198071	0.255149
A0A369J761	0.13857	0.168428	0.158318	0.168947	0.398428	0.401537	0.421323	0.347524	0.926266	0.917315	0.821605	0.822608
A0A369J7J6	0.25795	0.168987	0.301117	0.334809	0.342868	0.507302	0.279125	0.486714	0.262108	0.0485359	0.17161	0.560871
A0A369J929	0.192268	0.169397	0.294067	0.413389	0.37096	0.338439	0.263784	0.297497	0.0879665	0.102734	0.128397	0.199942
A0A369J918	0.188775	0.169811	0.262053	0.271565	NA	NA	NA	NA	0.152841	0.113265	0.135847	0.144812
A0A369JK68	0.176501	0.169961	0.159317	0.104982	0.0991389	0.0897119	0.052997	0.0506313	0.117079	0.174163	1.06812	0.148285
A0A369JPN1	0.199422	0.170071	0.188463	0.216967	NA	NA	NA	NA	0.444694	0.306261	0.358101	0.443619
A0A369JZ75	0.21755	0.170153	0.126833	0.178453	0.353102	0.349011	0.293806	0.352393	0.308856	0.289426	0.270801	0.239149
A0A369JY97	0.22206	0.171451	0.116117	0.10565	4.68502	5.18115	4.72657	5.55216	0.444446	0.166223	0.502549	0.614717
A0A369JPH6	0.135538	0.17184	0.166145	0.153494	NA	NA	NA	NA	0.378174	0.328398	0.362025	0.307942
A0A369K413	0.173629	0.171927	0.136982	0.155473	NA	NA	NA	NA	NA	NA	NA	NA
A0A369K789	0.0840662	0.172813	0.118007	0.0713772	0.605313	0.568002	0.589543	0.628715	0.360292	0.316708	0.124967	0.707931
A0A369J6N0	0.118374	0.173597	0.18735	0.157082	2.91834	2.89177	2.77392	3.24377	0.255067	0.255668	0.210542	0.232606
A0A369J0T8	0.264818	0.1737	0.239374	0.192695	NA	NA	NA	NA	0.490528	0.477231	0.582955	0.502873
A0A369JUG7	0.0511252	0.17378	0.0730399	0.108345	NA	NA	NA	NA	NA	NA	NA	NA
A0A369JJT5	0.416595	0.173782	0.235106	0.253375	0.236246	0.204438	0.257195	0.326694	0.520084	0.63853	0.638949	0.406111
A0A369K4L7	0.28254	0.175227	0.20253	0.198197	1.81371	1.56654	1.84921	2.25429	0.0628415	0.289118	0.139125	0.149394
A0A369JKU6	0.168996	0.175844	0.562086	0.611279	0.210984	0.28104	0.588929	0.212164	NA	NA	NA	NA
A0A369J757	0.117081	0.17586	0.157961	0.22064	0.0479476	0.0679117	0.0578838	0.0558542	0.275333	0.238647	0.261156	0.318633
A0A369JWA8	0.248621	0.176867	0.224847	0.204782	2.00754	2.27415	2.16066	2.42408	NA	NA	NA	NA
A0A369J979	0.23525	0.177231	0.192834	0.20627	NA	NA	NA	NA	0.174889	0.289152	0.18698	0.189279
A0A369K7A6	0.166909	0.179155	0.166915	0.147063	NA	NA	NA	NA	0.203999	0.20333	0.1446	0.149588
A0A369JTA2	0.213491	0.179595	0.175403	0.179353	NA	NA	NA	NA	0.529851	0.429581	0.381303	0.935594
A0A369JBD0	0.172152	0.180104	0.205591	0.184405	0.3335	0.364626	0.359704	0.360009	0.0876327	0.0782477	0.10744	0.0454699
A0A369K2B0	0.199477	0.18186	0.114025	0.146315	0.0607447	0.046416	0.0355596	0.0291064	0.187063	0.309089	0.164168	0.16139
A0A369JPL9	0.170918	0.182134	0.141508	0.120608	0.560277	0.415582	1.06981	0.538153	0.273869	0.00744538	0.158779	0.252944
A0A369JMM0	0.176018	0.182239	0.26299	0.194615	NA	NA	NA	NA	0.38108	0.419729	0.567448	0.430834
A0A369J818	0.182254	0.18348	0.284075	0.159281	0.576545	0.229991	0.556672	0.274152	0.314507	0.275352	0.305821	0.373785
A0A369JHI0	0.836827	0.187359	0.474945	0.729101	0.176754	0.230449	0.143267	0.195717	0.865282	0.734543	0.914751	0.97001
A0A369JFF9	0.17894	0.187735	0.191463	0.162194	NA	NA	NA	NA	0.498608	0.506296	0.368074	0.528814
A0A369JL15	0.193301	0.188733	0.135417	0.220644	NA	NA	NA	NA	0.119086	0.215075	0.124851	0.19178
A0A369K4P2	0.204657	0.189086	0.194159	0.171173	NA	NA	NA	NA	NA	NA	NA	NA
A0A369JLL3	0.214638	0.18983	0.374439	0.123052	0.732453	0.658438	0.923405	0.684734	0.467206	0.126644	0.67491	0.518662
A0A369JVL8	0.12075	0.190118	0.158585	0.184638	4.66078	3.58034	4.63412	4.09005	0.336918	0.420947	0.41902	0.260047
A0A369JE72	1.11896	0.190834	0.76935	1.24078	2.49923	2.09554	2.45977	2.58246	0.535972	0.875006	0.607074	0.44251
A0A369K4Y0	0.228295	0.191437	0.143936	0.181899	0.174173	0.165235	0.185197	0.139392	0.684194	0.76064	0.846387	0.621526
A0A369JBX1	0.140664	0.19156	0.0852199	0.259496	0.196692	0.119417	0.170442	0.1404	0.329646	0.464283	0.332621	0.331803
A0A369JWA4	0.192818	0.192524	0.179967	0.103848	0.582441	0.52839	0.668065	0.468199	0.0864859	0.219973	0.385358	0.279034
A0A369J2J2	0.38402	0.193008	0.454379	0.244167	NA	NA	NA	NA	0.998618	0.985101	0.481179	1.12626
A0A369JRS9	0.226309	0.19404	0.191877	0.202857	1.56149	1.67092	1.46761	1.46173	0.225321	0.287933	0.318697	0.193577
A0A369JZJ0	0.170554	0.194889	0.147391	0.289953	0.192731	0.241662	0.0717941	0.0668445	0.619633	0.591686	0.8826	0.80308
A0A369K2W0	0.193287	0.195386	0.841135	0.245006	5.44657	3.593	5.59302	4.34586	0.589491	0.686055	0.776766	0.745319
A0A369K6Z0	0.2132	0.197015	0.235934	0.272545	NA	NA	NA	NA	0.512685	0.43671	0.474248	0.550193
A0A369JCH4	0.20656	0.198932	0.1786	0.257027	NA	NA	NA	NA	0.293067	0.326833	0.220128	0.240279
A0A369JG32	0.105422	0.20011	0.242756	0.286638	0.697193	0.796035	0.67221	0.663069	0.50603	0.626633	0.376931	0.374503
A0A369JGM2	0.248953	0.200621	0.2709	0.287716	0.14974	0.122574	0.11859	0.110936	0.385005	0.471746	0.244184	0.278208
A0A369JKK1	0.201167	0.200772	0.154389	0.149226	NA	NA	NA	NA	NA	NA	NA	NA
A0A369JVS3	0.124749	0.200951	0.193863	0.171129	0.874476	0.999655	0.660341	1.34699	0.422984	0.421931	0.442906	0.721
A0A369K6Q2	0.353267	0.200994	0.26107	0.260742	0.356831	0.132409	0.119345	0.360036	0.238451	0.197646	0.155392	0.297297
A0A369JU92	0.172145	0.201085	0.155721	0.170551	0.252818	0.208847	0.22782	0.237507	NA	NA	NA	NA
A0A369JL95	0.164383	0.202965	0.169644	0.195943	2.20752	1.78879	2.28989	2.12874	0.419517	0.106641	0.162328	0.0962925
A0A369K5Q1	0.092232	0.204065	0.247876	0.238659	NA	NA	NA	NA	0.181194	0.178921	0.188857	0.179709
A0A369JF26	0.488782	0.204457	0.469075	0.523528	8.88276	7.54	10.061	9.26441	0.62933	0.481765	0.207128	0.414282
A0A369JBE4	0.255653	0.205279	0.252824	0.26987	0.721855	0.690824	0.80917	0.711255	0.131218	0.159648	0.147747	0.165703
A0A369JG08	0.100013	0.205519	0.17935	0.254375	0.766151	0.614604	0.602752	0.191744	0.0823716	0.0572855	0.0697057	0.0659786
A0A369K033	0.241139	0.206081	0.178445	0.279854	0.451681	0.243863	0.214668	0.416699	0.451591	0.151719	0.54423	0.707552
A0A369JZP9	0.207901	0.206959	0.208816	0.17521	0.177765	0.189238	0.168319	0.150635	0.173964	0.138128	0.122872	0.123538
A0A369JUN7	0.213203	0.208017	0.197321	0.217599	0.177412	0.163316	0.170468	0.149604	0.795011	0.515872	0.568234	0.472863
A0A369JN22	0.209299	0.208432	0.178434	0.197146	0.642572	0.748542	0.903415	0.667656	1.26283	1.13973	1.18334	1.2044
A0A369JGP9	0.201122	0.208775	0.18848	0.176254	6.47544	6.80499	6.36505	6.81178	0.270142	0.254199	0.285505	0.146689
A0A369JVE0	0.208616	0.209225	0.125968	0.136457	NA	NA	NA	NA	0.148332	0.179687	0.0902855	0.156327
A0A369JYQ7	0.41496	0.210582	1.08699	0.279686	7.45177	6.34271	7.26325	7.99993	1.04771	0.72323	0.692797	0.737816
A0A369J5D9	0.220044	0.210608	0.186606	0.220371	1.47173	1.74951	1.52775	2.31745	NA	NA	NA	NA
A0A369JKB8	0.207952	0.211042	0.183207	0.135244	NA	NA	NA	NA	0.0620725	0.211474	0.475364	0.54968
A0A369K9B2	0.192047	0.211345	0.152949	0.20774	0.10164	0.31255	0.0266201	0.386912	0.252028	0.226609	0.229081	0.218675
A0A369JPG9	0.41546	0.212351	0.182775	0.259681	0.899923	0.905417	1.00286	1.14058	0.280228	0.29331	0.254172	0.235008
A0A369K047	0.21779	0.213964	0.299217	0.221101	NA	NA	NA	NA	0.281684	0.310016	0.301203	0.374289
A0A369JIZ5	0.204941	0.214579	0.267954	0.27557	0.0767085	0.133301	0.114053	0.108288	NA	NA	NA	NA
A0A369KGU4	0.197605	0.215007	0.101708	0.217063	NA	NA	NA	NA	0.187594	0.210685	0.170856	0.174309
A0A369K5D3	0.215708	0.215394	0.740053	0.240897	NA	NA	NA	NA	0.217584	0.244211	0.202721	0.144079
A0A369JGG8	0.199867	0.215839	0.184279	0.213073	0.0648828	0.134399	0.0748956	0.0953063	0.884753	0.943919	0.766907	0.843895
A0A369JIR0	0.179895	0.216031	0.162168	0.213488	13.1608	13.7428	13.0586	12.9119	0.131452	0.118938	0.133584	0.0704159
A0A369K7W9	0.383391	0.216437	0.313202	0.363491	NA	NA	NA	NA	0.970293	1.15795	0.869678	0.797672
A0A369JCE5	0.220758	0.216719	0.176763	0.215259	0.381854	0.326623	0.266527	0.348297	0.108466	0.191804	0.208157	0.213821
A0A369JJK1	0.340483	0.217003	0.160027	0.271507	6.45546	6.70842	6.19746	6.11249	0.283463	0.153881	0.306267	0.30039
A0A369J9G8	0.150321	0.219725	0.161482	0.209683	NA	NA	NA	NA	0.179774	0.228892	0.221652	0.208776
A0A369J3T9	0.206795	0.221037	0.270697	0.220776	NA	NA	NA	NA	0.308346	0.36754	0.330218	0.333093
A0A369JFQ9	0.323989	0.221228	0.256823	0.312278	0.758581	0.75223	0.66699	0.662169	0.273665	0.333557	0.25612	0.365561
A0A369JYN7	0.164052	0.221409	0.185516	0.188949	0.810974	1.35576	1.39673	1.3657	NA	NA	NA	NA
A0A369JWW4	0.219765	0.222386	0.277903	0.172377	NA	NA	NA	NA	0.399137	0.37594	0.151454	0.408284
A0A369JPN0	0.317641	0.222406	0.229759	0.418923	0.0951677	0.074285	0.0913063	0.152959	0.379382	0.450935	0.294533	0.445266
A0A369JYD8	0.463933	0.222713	0.17028	0.171326	NA	NA	NA	NA	NA	NA	NA	NA
A0A369JS84	0.342055	0.224505	0.239859	0.269745	NA	NA	NA	NA	0.388864	0.535322	0.345106	0.402316
A0A369JU48	0.28362	0.225429	0.238828	0.301855	NA	NA	NA	NA	0.530051	0.240025	0.590796	0.461342
A0A369JIW3	0.310059	0.225737	0.178075	0.195193	NA	NA	NA	NA	0.252526	0.0985347	0.386002	0.524887
A0A369K712	0.34787	0.22587	0.205894	0.326741	1.44384	1.65418	1.55988	1.78476	1.21717	1.56233	2.25358	2.09277
A0A369JE10	0.268247	0.226071	0.151954	0.220804	NA	NA	NA	NA	0.136953	0.135167	0.142141	0.156962
A0A369K7Q7	0.263515	0.226959	0.214613	0.225414	NA	NA	NA	NA	0.357692	0.378304	0.39192	0.203163
A0A369JJS6	0.223148	0.227402	0.613988	0.185387	2.38291	2.5855	2.67725	2.11238	0.840681	0.414369	0.654228	0.323471
A0A369JZG8	0.202983	0.228327	0.241302	0.132131	2.02741	2.16286	2.22192	1.78846	0.383731	0.240218	0.148551	0.501669
A0A369KAE7	0.198509	0.228502	0.255209	0.247134	NA	NA	NA	NA	0.452841	0.381709	0.373742	0.503287
A0A369K4D9	0.253538	0.228695	0.288812	0.315781	NA	NA	NA	NA	0.347595	0.504619	0.232992	0.451936
A0A369K4H2	0.199782	0.229248	0.181705	0.167217	NA	NA	NA	NA	0.135739	0.152822	0.151443	0.148376
A0A369JY82	0.824293	0.229258	0.802329	0.832446	NA	NA	NA	NA	0.681664	0.693249	1.14999	1.62551
A0A369JRP9	0.20415	0.230445	0.291868	0.16375	NA	NA	NA	NA	0.195307	0.2088	0.183262	0.253806
A0A369J748	0.255284	0.231132	0.158313	0.233296	NA	NA	NA	NA	0.378669	0.460267	0.493722	0.308655
A0A369JNL6	0.195209	0.231672	0.219639	0.165935	0.160799	0.146987	0.149284	0.1832	0.158045	0.165368	0.1284	0.142424
A0A369J4T9	0.162732	0.232327	0.162793	0.141996	0.404226	0.232982	0.46391	0.245354	NA	NA	NA	NA
A0A369JDF2	0.2655	0.23285	0.144992	0.284175	0.574604	0.910441	0.954001	0.830227	NA	NA	NA	NA
A0A369K660	0.150852	0.233374	0.0576186	0.140533	0.352028	0.351778	0.391207	0.904485	0.188429	0.268322	0.315476	0.262199
A0A369JIW2	0.282738	0.23343	0.294394	0.399208	NA	NA	NA	NA	0.865216	0.631457	0.866344	0.705474
A0A369JH08	0.27655	0.233797	0.25585	0.292405	NA	NA	NA	NA	NA	NA	NA	NA
A0A369K5A8	0.579627	0.233994	0.28013	0.297119	9.62087	9.33299	10.8896	8.91306	0.38109	0.449718	0.332204	0.282145
A0A369JZG0	0.196745	0.234526	0.150845	0.223512	1.32467	1.22653	1.27808	1.17849	NA	NA	NA	NA
A0A369JY22	0.217083	0.234973	0.190245	0.201666	NA	NA	NA	NA	0.419256	0.443896	0.371775	0.359121
A0A369K3P8	0.375375	0.235793	0.397886	0.35455	NA	NA	NA	NA	0.836371	0.977567	0.879031	0.969996
A0A369JQE5	0.219114	0.236084	0.233373	0.197981	0.348825	0.0844063	0.178133	0.242689	NA	NA	NA	NA
A0A369JHX2	0.390516	0.238283	0.427247	0.355739	0.468478	0.304714	0.179003	0.271233	0.189305	0.206112	0.216591	0.185557
A0A369K3K8	0.185694	0.238813	0.225737	0.119203	0.533017	0.311628	0.252263	0.538531	0.338171	0.291114	0.320526	0.492468
A0A369JIW6	0.225181	0.240152	0.228208	0.268497	0.0515091	0.0768979	0.0847639	0.0534058	0.262089	0.24718	0.223636	0.249559
A0A369JV96	0.175121	0.241048	0.452129	0.180125	1.86365	2.74846	1.90848	1.89919	NA	NA	NA	NA
A0A369J902	0.183603	0.241497	0.21454	0.208389	0.933718	0.872788	0.914735	0.859041	0.0933868	0.177996	0.106197	0.00837133
A0A369JFC7	0.504698	0.241732	0.170263	0.496282	0.284151	0.134129	0.51191	0.49519	0.184696	0.415457	0.551114	0.468391
A0A369JSN4	0.276	0.242259	0.262158	0.294906	NA	NA	NA	NA	0.192322	0.168832	0.156203	0.139598
A0A369J3Y2	0.222763	0.243483	0.284116	0.17712	NA	NA	NA	NA	0.280272	0.308112	0.268771	0.261609
A0A369JS35	0.310792	0.243622	0.152091	0.585988	1.77174	1.45274	2.08539	1.79939	0.375592	0.396128	0.416899	0.424011
A0A369JVY3	0.146648	0.243928	0.133558	0.0991064	0.491774	0.273909	0.339634	0.295473	0.870033	0.86594	1.01561	1.00602
A0A369KFH1	0.29062	0.243964	0.220432	0.282066	NA	NA	NA	NA	0.196229	0.301045	0.143986	0.177614
A0A369K7H2	0.260698	0.243993	0.252426	0.201813	NA	NA	NA	NA	0.350331	0.373936	0.295831	0.307476
A0A369K4N4	0.406288	0.245343	0.304093	0.347842	5.0442	6.61832	5.8075	6.16898	NA	NA	NA	NA
A0A369JNA8	0.332427	0.2464	0.3014	0.423907	0.27829	0.244793	0.326136	0.339737	NA	NA	NA	NA
A0A369K664	0.182493	0.246968	0.394691	0.220451	0.784857	0.741317	0.405693	0.663151	0.117417	0.0906942	0.201097	0.175436
A0A369JIY3	0.172604	0.247146	0.156695	0.227091	0.658397	0.684852	0.741833	0.735007	0.115443	0.211008	0.0968629	0.125865
A0A369JCA4	0.203283	0.248656	0.111921	0.213299	NA	NA	NA	NA	NA	NA	NA	NA
A0A369JMI2	0.223122	0.25147	0.194761	0.117914	4.25235	3.17646	2.56809	3.66344	0.158923	0.171955	0.181604	0.285154
A0A369K0D8	0.21823	0.251498	0.241774	0.263137	NA	NA	NA	NA	0.283851	0.383579	0.515829	0.430769
A0A369JBP5	0.230441	0.252269	0.366034	0.219392	NA	NA	NA	NA	0.243116	0.226028	0.228575	0.299313
A0A369JYX0	0.231259	0.253163	0.256715	0.23153	1.11085	1.12834	0.906286	1.14697	0.6636	0.530916	0.411069	0.663585
A0A369K294	0.277565	0.253168	0.281147	0.31344	0.300709	0.173306	0.277236	0.298628	0.591085	0.500691	0.680832	0.437459
A0A369JZX8	0.419677	0.253558	0.606383	0.384547	39.7196	39.9849	40.641	39.7101	0.312434	0.424338	0.497621	0.395622
A0A369K5A1	0.270551	0.253951	0.31396	0.305222	NA	NA	NA	NA	0.154746	0.165535	0.199259	0.161202
A0A369JWD6	0.264744	0.254048	0.288236	0.276366	NA	NA	NA	NA	0.115508	0.167701	0.147423	0.134747
A0A369J1Z2	0.144668	0.25519	0.21675	0.0496466	1.73723	2.42085	1.94521	1.84081	0.234855	0.213938	0.105999	0.0598776
A0A369K8S7	0.57954	0.257216	0.283331	0.356229	NA	NA	NA	NA	0.804272	0.670803	0.671079	0.832287
A0A369JYU1	0.252998	0.257946	0.232917	0.209812	NA	NA	NA	NA	0.301126	0.266427	0.250732	0.41833
A0A369JXC8	0.236697	0.259619	0.278565	0.301935	NA	NA	NA	NA	NA	NA	NA	NA
A0A369K8Y8	0.332789	0.260101	0.190288	0.232855	NA	NA	NA	NA	0.253399	0.239115	0.283066	0.0873752
A0A369JQS6	0.247952	0.260481	0.189658	0.227049	NA	NA	NA	NA	0.528199	0.571051	0.484759	0.434528
A0A369JM24	0.405857	0.260689	0.239117	0.282846	0.113117	0.116492	0.110444	0.118851	0.360063	0.400105	0.652334	0.653266
A0A369JI51	0.397423	0.260764	0.316145	0.183323	0.486561	0.438401	0.537524	0.493888	0.413223	0.359125	0.276711	0.285202
A0A369IYA1	0.319767	0.261192	0.276689	0.322513	NA	NA	NA	NA	0.159519	0.191493	0.137995	0.243833
A0A369JKI8	0.323722	0.261852	0.17436	0.196078	2.26969	0.0305488	3.08629	0.0342399	0.32969	0.338184	0.36024	0.082767
A0A369JXD1	0.23358	0.262635	0.374215	0.346047	NA	NA	NA	NA	0.17703	0.111856	0.158987	0.143354
A0A369JC65	0.62465	0.262689	0.561887	0.230153	6.30739	9.61384	8.14253	8.44296	0.297236	0.249418	0.256821	0.260431
A0A369JNQ7	0.346865	0.263849	0.281588	0.310629	0.221857	0.17912	0.137627	0.184072	0.233839	0.257641	0.279183	0.420177
A0A369JZY7	0.255555	0.263855	0.285571	0.24432	0.172246	0.28024	0.174194	0.253244	0.21395	0.2265	0.338554	0.39871
A0A369K4X2	0.394527	0.264152	0.34093	0.331549	NA	NA	NA	NA	0.679397	0.779867	0.697293	0.769937
A0A369JMU8	0.194151	0.264408	0.248447	0.238961	NA	NA	NA	NA	0.30029	0.178884	0.159836	0.471523
A0A369K8A7	0.209919	0.264503	0.33259	0.225325	NA	NA	NA	NA	0.473598	0.703224	0.625156	0.723078
A0A369JIB4	0.291032	0.26452	0.295783	0.335248	0.596884	0.433934	0.517339	0.532253	0.69079	0.951544	1.1403	0.40145
A0A369K396	0.12741	0.265523	0.138951	0.139814	1.94991	2.13694	2.05692	1.69725	0.185449	0.281976	0.410355	0.414514
A0A369JVH7	0.273937	0.266106	0.273644	0.289313	NA	NA	NA	NA	0.280537	0.377288	0.275759	0.178444
A0A369KBC4	0.592189	0.266341	0.520821	0.162692	6.84966	6.18698	6.04119	7.62304	0.859669	0.564122	0.696172	0.143389
A0A369J6D0	0.152978	0.267215	0.239305	0.245485	0.391917	0.461358	0.324409	0.512213	0.0452947	0.0470934	0.148942	0.0112381
A0A369KIJ2	0.214077	0.267642	0.190379	0.16569	NA	NA	NA	NA	0.254958	0.447907	0.204354	0.515401
A0A369K274	0.294837	0.267649	0.37831	0.401247	0.848902	0.367557	0.176499	0.677311	0.734836	0.988547	0.843622	0.857918
A0A369JBH5	0.238184	0.268311	0.314773	0.176342	NA	NA	NA	NA	0.988938	0.569921	0.420227	0.812384
A0A369KFQ4	0.226539	0.269208	0.265786	0.280832	NA	NA	NA	NA	0.806944	0.867365	0.777099	0.977907
A0A369KAA6	0.408024	0.269261	0.348571	0.211877	NA	NA	NA	NA	0.405834	0.248509	0.280718	0.388641
A0A369K3F3	0.289101	0.269781	0.245013	0.305223	0.56982	0.55566	0.74371	0.8564	0.107579	0.115973	0.121496	0.0639168
A0A369KAQ8	0.323387	0.270252	0.218195	0.256459	NA	NA	NA	NA	0.450934	0.213712	0.413502	0.200367
A0A369JJE2	0.430845	0.270637	0.29907	0.253649	0.32206	0.174186	0.239305	0.223034	0.623295	0.588902	0.451942	0.489304
A0A369J7R2	0.169882	0.271882	0.117387	0.156059	NA	NA	NA	NA	0.552314	0.697827	0.540912	0.501739
A0A369JQH2	0.238431	0.272721	0.113376	0.195203	NA	NA	NA	NA	NA	NA	NA	NA
A0A369J3V1	0.510137	0.272959	0.185179	0.607036	NA	NA	NA	NA	1.70103	1.89157	1.36411	1.27708
A0A369JWK3	0.358901	0.274235	0.66328	0.488505	0.0767274	0.087625	0.112344	0.10402	0.287088	0.326206	0.692034	0.602858
A0A369K4H1	0.192469	0.275368	0.252902	0.19118	5.49618	5.32919	5.74325	5.667	0.425714	0.409713	0.474782	0.188111
A0A369JGM7	0.379611	0.275383	0.540862	0.262865	0.414065	0.375261	0.570299	0.627016	1.06139	1.07407	0.97312	1.00333
A0A369K1V7	0.278812	0.277953	0.408481	0.318297	0.675968	0.595737	0.602074	0.464619	0.365746	0.30575	0.358128	0.360778
A0A369K4J4	0.275301	0.278655	0.304377	0.380348	0.669939	0.571421	0.439242	0.57724	0.298409	0.308887	0.293136	0.172853
A0A369JC24	0.145818	0.279048	0.320462	0.269987	0.452014	0.3902	0.343447	0.456955	0.497917	0.565557	0.568673	0.365106
A0A369JVM4	0.292539	0.279299	0.297308	0.407183	0.691443	0.650384	0.474996	0.793876	0.988427	0.924639	0.887927	0.894386
A0A369K289	0.294423	0.281593	0.339621	0.277655	4.26188	5.41988	3.96142	4.91141	0.31727	0.280694	0.493958	0.354251
A0A369JYI9	0.230596	0.281626	0.279137	0.208532	NA	NA	NA	NA	0.110406	0.115081	0.0619878	0.056435
A0A369JF39	0.256285	0.281748	0.293638	0.180942	5.00477	4.93692	4.4069	4.54753	0.282567	0.407701	0.459361	0.520684
A0A369JUL3	0.367396	0.281775	0.552862	0.442197	NA	NA	NA	NA	1.3568	1.22467	1.22931	1.0835
A0A369IY90	0.446642	0.282096	0.45727	0.468483	0.265809	0.291472	0.291462	0.242429	0.56274	0.60843	0.433114	0.574295
A0A369JVA4	0.240772	0.28244	0.30018	0.215491	0.302579	0.176639	0.364045	0.738201	0.225558	0.278603	0.210011	0.237912
A0A369K729	0.412232	0.283266	0.874967	0.648995	1.42575	1.94164	1.33478	1.37014	0.939843	1.49729	1.17668	1.31702
A0A369K0R9	0.300515	0.284465	0.329132	0.247753	2.23274	1.94609	2.04425	1.91675	3.5748	3.95521	3.4224	3.90011
A0A369JYC8	0.358391	0.28553	0.382404	0.368051	NA	NA	NA	NA	0.415267	0.294143	0.453732	0.260722
A0A369JQB4	0.604717	0.285775	0.385119	0.382055	0.510759	0.409437	0.280711	0.558632	0.132539	0.145065	0.220304	0.164891
A0A369JZ24	0.32521	0.287475	0.383468	0.336068	0.907233	0.878555	0.854208	0.885744	NA	NA	NA	NA
A0A369JKE6	0.14394	0.288069	0.491802	0.289936	NA	NA	NA	NA	2.76543	3.32976	3.2221	4.05181
A0A369JBS0	0.261319	0.28815	0.271989	0.136545	0.0611143	0.099156	0.0573223	0.0608211	0.214577	0.237898	0.183796	0.306214
A0A369JB74	0.296313	0.288831	0.376125	0.345721	0.0918757	0.0826199	0.0950425	0.55219	0.130483	0.158124	0.152554	0.115245
A0A369K4V1	0.225358	0.289547	0.234307	0.299651	NA	NA	NA	NA	0.4812	0.62204	0.46912	0.391972
A0A369IZU7	0.33792	0.289781	0.184314	0.256894	0.168201	0.196359	0.247796	0.318711	0.709503	0.542209	0.614605	0.716411
A0A369JDY0	0.437962	0.290331	0.268774	0.258829	0.0258002	0.0331389	0.186294	0.0212145	1.11565	0.692442	0.820271	0.999519
A0A369JK46	0.282703	0.290381	0.568107	0.437884	NA	NA	NA	NA	1.15831	1.23195	0.986085	1.00754
A0A369K7V4	0.448333	0.290537	0.562639	0.305065	0.629675	0.204045	0.736501	0.429322	NA	NA	NA	NA
A0A369JHX8	0.282972	0.290644	0.286931	0.288708	0.61992	0.65906	0.631252	1.06537	0.184781	0.17987	0.131576	0.148512
A0A369K1E9	0.249873	0.2914	0.159264	0.213539	0.206428	0.197056	0.235147	0.436001	0.328733	0.398393	0.271382	0.285177
A0A369KA29	0.375488	0.291404	0.316286	0.362197	NA	NA	NA	NA	0.593226	0.647759	0.760146	0.955322
A0A369J0T1	0.745414	0.291619	1.03008	0.75042	6.87863	6.29599	6.9091	7.37259	0.625865	0.708043	0.73251	0.561123
A0A369JDY8	0.158845	0.293804	0.245679	0.214466	NA	NA	NA	NA	0.330667	0.387407	0.520769	0.628149
A0A369JHS4	0.197804	0.293973	0.18215	0.177584	NA	NA	NA	NA	0.374385	0.54454	0.481622	0.463069
A0A369JNS6	0.148351	0.297183	0.592817	0.309293	0.43147	0.570456	0.477497	0.830027	0.360705	0.375411	0.378789	0.541384
A0A369JKF0	0.312811	0.298012	0.324371	0.282775	0.109885	0.576783	0.107176	0.134498	1.22287	1.34608	1.17175	1.24366
A0A369K9Z4	0.878445	0.29841	0.270347	0.151435	1.76263	1.25194	2.0337	0.938537	0.534412	0.627072	0.854364	0.295132
G1UJX5	0.371793	0.298534	0.425028	0.26515	NA	NA	NA	NA	0.989083	1.05128	0.869318	0.679528
A0A369JUA6	0.153319	0.299292	0.285341	0.180749	0.234088	0.404696	0.227386	0.399758	0.66812	0.837794	0.520268	0.555096
A0A369JQY5	0.161883	0.30074	0.265978	0.201723	1.44456	2.3283	1.67064	1.6968	NA	NA	NA	NA
A0A369J427	0.252761	0.301075	0.198272	0.127604	NA	NA	NA	NA	1.21222	1.07109	1.13295	0.768662
A0A369JDK1	0.396593	0.301851	0.637544	0.369395	1.94354	2.23822	1.38633	2.54593	0.226725	0.228664	0.158807	0.135094
A0A369K4P8	0.200528	0.304634	0.154068	0.222219	0.175307	0.338876	0.232576	0.232728	1.57295	1.24867	1.43596	1.28255
A0A369JHQ3	0.234457	0.305412	0.475111	0.325819	1.13903	0.75225	1.2473	0.772894	0.281485	0.196638	0.211119	0.17445
A0A369JZ91	0.328511	0.306255	0.421112	0.2822	NA	NA	NA	NA	0.201848	0.213224	0.168672	0.159175
A0A369K9D5	0.308594	0.306713	0.347022	0.330585	NA	NA	NA	NA	0.7632	1.01146	1.01202	0.637465
A0A369JJ95	0.376904	0.306767	0.707785	0.238218	0.452885	0.593301	0.186607	0.195167	0.923923	0.714415	0.334011	0.592205
A0A369K1L8	0.23775	0.3068	0.305654	0.265569	NA	NA	NA	NA	0.551376	0.495898	0.712623	0.433758
A0A369K051	0.361242	0.306827	0.331017	0.268461	0.0937722	0.0473816	0.0691435	0.0704328	0.229954	0.273262	0.213362	0.187044
A0A369J3R4	0.0921113	0.306892	0.0641591	0.115216	1.01706	0.765583	0.776512	0.501671	0.326188	0.481941	0.298259	0.347072
A0A369JP65	0.355492	0.307751	0.317341	0.36051	1.52127	1.44905	1.94546	1.69464	0.123228	0.143517	0.114528	0.0783483
A0A369JAJ3	0.301971	0.307989	0.410325	0.284446	NA	NA	NA	NA	0.485392	0.415815	0.516835	0.444643
A0A369JU37	0.391171	0.30887	0.404552	0.387818	0.441647	0.302011	0.44647	0.396591	0.994414	0.957538	0.823189	0.889072
A0A369JX93	0.276939	0.309244	0.20957	0.267777	NA	NA	NA	NA	0.23537	0.360526	0.213664	0.278772
A0A369K2U7	0.285955	0.309396	0.299431	0.30911	0.0506129	0.100503	0.0746404	0.064475	0.776257	0.713868	0.576089	1.23064
A0A369JDL7	0.370362	0.309597	0.385905	0.329791	NA	NA	NA	NA	NA	NA	NA	NA
A0A369KC42	0.260268	0.310118	0.0402248	0.225519	1.69616	1.30837	0.905402	1.76912	0.383192	0.377882	0.345543	0.473395
A0A369JWU7	0.366092	0.310519	0.31993	0.302991	0.606393	0.978324	0.552905	0.665001	0.363618	0.417847	0.86349	0.633592
A0A369JB39	0.648178	0.311198	0.234796	0.501753	0.0934815	0.0904504	0.109962	0.104491	0.074492	0.155407	0.135802	0.171399
A0A369JMU0	0.179956	0.311507	0.293177	0.288512	NA	NA	NA	NA	0.63771	0.537833	0.537908	0.398265
A0A369J7D1	0.267288	0.311636	0.274596	0.3195	1.33285	0.916399	1.15606	0.935898	NA	NA	NA	NA
A0A369JNU1	0.353485	0.311653	0.132897	0.204323	3.73371	3.59793	3.31888	3.42733	NA	NA	NA	NA
A0A369JGG1	0.394555	0.312373	0.427018	0.392052	0.704028	0.502603	0.383292	0.479016	NA	NA	NA	NA
A0A369KC16	0.26944	0.314623	0.299385	0.279084	2.82293	1.56402	1.57402	1.57283	0.324304	0.562663	0.508742	0.643163
A0A369JGB7	0.28913	0.314898	0.453451	0.471708	0.154752	0.311368	0.289139	0.260266	0.107037	0.0947306	0.100391	0.0803884
A0A369JQU2	0.238365	0.316228	0.12933	0.222437	0.0792776	0.102154	0.0509756	0.0547048	0.256477	0.306797	0.308533	0.39398
A0A369JFX8	0.224911	0.316361	0.214358	0.275443	NA	NA	NA	NA	0.443252	0.472367	0.57719	0.505415
A0A369K9J9	0.64709	0.31662	0.796977	0.630711	1.20136	1.1076	1.29799	0.67411	0.874312	0.734354	0.973252	0.874412
A0A369JTR1	0.837429	0.31681	0.820152	0.326244	3.07014	2.76595	2.95615	3.60239	0.621594	0.468194	0.397278	0.415773
A0A369JYY6	0.313934	0.317208	0.136781	0.35263	24.7594	24.6233	25.1921	24.0425	0.30015	0.457918	0.538419	0.632044
A0A369JTI5	0.810867	0.318173	0.69547	0.390324	8.23461	7.25989	6.48352	7.7961	0.898721	0.817129	0.773	0.810773
A0A369JB92	0.301593	0.318373	0.254637	0.625058	1.29647	1.16988	1.07807	1.01055	1.14644	1.38746	0.501872	0.678329
A0A369J6B6	0.268549	0.320408	0.216813	0.235216	NA	NA	NA	NA	0.341045	0.318139	0.261734	0.319533
A0A369K3T4	0.367636	0.320541	0.299779	0.264799	NA	NA	NA	NA	NA	NA	NA	NA
A0A369JKP0	0.428306	0.321623	0.582068	1.07306	0.182074	0.169333	0.111211	0.178693	1.96523	1.55316	1.54576	1.34275
A0A369JRG3	0.453764	0.322026	0.379184	0.414999	1.5065	1.47317	0.922738	1.86376	0.670266	0.61339	0.585726	0.371496
A0A369JJQ9	0.307519	0.323354	0.892819	0.446058	0.598004	0.498649	0.543198	0.54868	0.160404	0.137105	0.146953	0.191863
A0A369JAC1	0.210763	0.328031	0.261258	0.283669	0.370485	0.320801	0.349078	0.374892	NA	NA	NA	NA
A0A369JJI6	0.341087	0.328182	0.310953	0.202412	0.500148	0.361923	0.506774	0.373243	0.43239	0.318718	0.3185	0.501282
A0A369JNB2	0.838238	0.331738	0.822115	0.571776	0.203358	0.215978	0.420915	0.321486	0.613875	1.33188	0.683896	0.620199
A0A369JRQ8	0.473984	0.331787	0.37316	0.334392	NA	NA	NA	NA	1.46821	1.30108	0.914504	1.28337
A0A369JDX0	0.209325	0.333135	0.262026	0.306202	0.17968	0.078715	0.131886	0.10702	1.78927	0.853132	1.77605	2.04901
A0A369J559	0.178573	0.334919	0.398476	0.305479	1.05989	1.25521	1.05549	1.2593	0.398617	0.279931	0.106307	0.251887
A0A369JJU6	0.529729	0.335288	0.513709	0.383899	0.714568	0.556918	0.499213	0.734359	0.39617	0.575652	0.883541	0.624867
A0A369JFB8	3.20768	0.33531	3.58305	0.318279	0.28273	0.199911	0.178873	0.189695	1.26303	1.41426	1.32424	1.27278
A0A369JMK6	0.299617	0.335956	0.459282	0.488996	1.1006	0.99724	1.22868	1.16387	0.0795448	0.115542	0.0670385	0.0669372
A0A369JQV5	0.651933	0.336762	0.488604	0.271349	0.337343	0.509181	0.349719	0.438279	0.26422	0.189198	0.206906	0.179038
A0A369JY59	0.199958	0.337047	0.226277	0.121496	NA	NA	NA	NA	0.733407	0.849594	0.754862	0.814383
A0A369K6L1	0.397263	0.337667	0.242626	0.42398	0.340958	0.0803525	0.325825	0.278147	0.15686	0.207276	0.150599	0.180298
A0A369K676	0.371329	0.338372	0.362678	0.411535	0.126795	0.242366	0.123805	0.224989	0.806272	0.667925	0.741065	0.515735
A0A369JB89	0.354509	0.338909	0.776296	1.10767	1.64555	1.79687	0.877399	1.78856	1.30314	1.59997	1.46258	1.38117
A0A369JU09	0.311706	0.339829	0.538571	0.556748	0.186636	0.18142	0.423076	0.439071	NA	NA	NA	NA
A0A369JIM5	0.197765	0.339897	0.277679	0.265129	1.42131	1.3025	1.37811	1.4434	0.165815	0.204198	0.235779	0.156595
A0A369J3U0	0.458819	0.340456	0.352843	0.39254	3.36787	4.36966	3.79416	4.13289	0.291185	0.261305	0.120309	0.00608618
A0A369JEB1	0.369292	0.340642	0.321409	0.303821	NA	NA	NA	NA	0.546158	0.600438	0.563416	0.605822
A0A369JFY1	0.312107	0.340952	0.328476	0.756247	0.56651	0.546259	0.191637	0.762066	0.483034	0.843639	0.822206	0.713614
A0A369JVH1	0.35887	0.341883	0.39011	0.505931	0.368853	0.313548	0.415342	0.1522	0.899305	1.72483	1.12182	1.08571
A0A369JHT0	0.208717	0.343234	0.489298	0.354334	NA	NA	NA	NA	0.512957	0.401125	0.279842	0.497062
A0A369K2V9	0.312946	0.343823	0.231755	0.285313	1.51055	0.641	0.496441	0.591434	0.252916	0.260116	0.279422	0.278316
A0A369KCF5	0.334868	0.344401	0.428866	0.245216	0.507693	0.734904	0.582371	0.596208	0.167073	0.173763	0.112996	0.0761916
A0A369J9Y2	0.332925	0.345827	0.299044	0.278811	NA	NA	NA	NA	0.328921	0.285236	0.26345	0.313561
A0A369K484	0.350528	0.346336	0.334158	0.36787	NA	NA	NA	NA	0.353009	0.319815	0.490698	0.358196
A0A369J9E2	0.26663	0.347873	0.158059	0.497114	NA	NA	NA	NA	0.440206	0.357516	0.628995	0.386284
A0A369K5P6	0.26877	0.35009	0.349104	0.282005	NA	NA	NA	NA	0.425021	0.449637	0.311339	0.286894
A0A369KD73	0.371094	0.350326	0.289108	0.28859	0.197474	0.211577	0.316372	0.297813	0.22048	0.268614	0.218431	0.276353
A0A369JUR0	0.377237	0.350431	0.329927	0.393403	4.1986	3.52341	4.10983	3.98202	0.192318	0.364307	0.427229	0.274628
A0A369K4M5	0.462666	0.352612	0.454232	0.271437	0.221119	0.218079	0.145215	0.148252	0.347335	0.385971	0.209851	0.371223
A0A369K8H0	0.228655	0.352708	0.274586	0.203643	6.50131	6.01364	6.31788	6.74218	0.45575	0.464283	0.535532	0.516176
A0A369K6J6	0.466244	0.353967	0.569014	0.702152	6.51658	6.63738	6.74515	6.38947	0.451984	0.692938	0.751033	0.29534
A0A369JTP5	0.709221	0.355093	0.530738	0.552516	0.175435	0.0677864	0.110871	0.14067	0.116633	0.134501	0.0919954	0.245586
A0A369J716	0.259868	0.355146	0.181382	0.36551	NA	NA	NA	NA	0.371629	0.236142	0.254289	0.289683
A0A369J7B8	0.411318	0.35611	0.338803	0.401223	3.61727	3.51056	3.34644	4.75074	0.304232	0.278141	0.234936	0.327833
A0A369JIH8	0.134278	0.356734	0.309233	0.34643	NA	NA	NA	NA	0.646331	0.745493	0.620579	0.687752
A0A369JNV1	0.315278	0.358166	0.196857	0.22352	0.127753	0.117439	0.105176	0.115921	0.177147	0.197438	0.172773	0.182536
A0A369JK15	0.304466	0.35818	0.168293	0.330128	0.568782	0.492113	0.589246	0.755828	0.294404	0.375955	0.202375	0.62409
A0A369JH57	0.6764	0.360536	0.382	0.827349	0.36134	0.503634	0.402618	0.297846	1.01801	0.864006	1.02939	1.06962
A0A369KB16	0.305975	0.361813	0.304933	0.349882	NA	NA	NA	NA	0.367203	0.441379	0.348583	0.310825
A0A369J6U0	0.306545	0.364625	0.28229	0.346368	NA	NA	NA	NA	0.331835	0.356162	0.373593	0.258781
A0A369JDS4	0.367806	0.365708	0.622486	0.436148	0.0708666	0.370855	0.39069	0.352231	0.164977	0.19518	0.252525	0.0671059
A0A369K3K9	1.33635	0.365834	1.10452	0.573553	NA	NA	NA	NA	1.52899	1.78533	1.14033	1.45926
A0A369JHT8	0.304527	0.367387	0.278431	0.348015	NA	NA	NA	NA	0.296374	0.324611	0.219337	0.329815
A0A369K239	0.347938	0.367849	0.294657	0.458055	NA	NA	NA	NA	0.611457	0.720894	0.732258	0.697297
A0A369J490	0.274807	0.368092	0.354672	0.270331	1.29518	1.22657	1.40801	1.3915	0.10808	0.121836	0.0854012	0.0733318
A0A369JCZ0	0.337611	0.368313	0.660212	0.469468	0.169979	0.178105	0.399878	0.0933256	0.309037	0.195836	0.11066	0.242693
A0A369JPY8	0.399953	0.368515	0.33889	0.606909	0.250034	0.346939	0.283194	0.292741	NA	NA	NA	NA
A0A369JL71	0.338503	0.369765	0.263055	0.367196	0.528304	0.737257	0.462768	0.469924	0.331716	0.314259	0.264667	0.262234
A0A369JYU0	0.889746	0.370164	0.540994	0.588883	NA	NA	NA	NA	0.544464	0.381039	0.892383	0.580612
A0A369JK93	0.450107	0.371253	0.286799	0.377597	1.50471	1.54564	0.965543	1.63264	0.565539	0.589251	0.369266	0.552628
A0A369JZK0	0.429359	0.371644	0.540835	0.637097	0.155079	0.25989	0.166287	0.175591	0.39027	0.166393	0.311394	0.276639
A0A369IY36	0.436017	0.372045	0.286496	0.320742	NA	NA	NA	NA	0.826206	0.721458	0.646476	0.754579
A0A369J5W9	0.290318	0.372654	0.321637	0.342301	0.493158	0.396859	0.465773	0.370333	0.440358	0.549708	0.510387	0.466391
A0A369K7B1	0.216379	0.372814	0.211611	0.19543	NA	NA	NA	NA	0.275577	0.199147	0.365439	0.350952
A0A369JKF8	0.372466	0.375852	0.274604	0.383316	3.17405	3.97926	3.9881	3.67648	0.189032	0.254742	0.177902	0.478704
A0A369K855	0.251247	0.376003	0.354955	0.298215	0.117495	0.105691	0.123341	0.0997103	0.376054	0.35902	0.378863	0.442137
A0A369J463	0.461996	0.376094	0.789787	0.534268	0.360684	0.506144	0.65328	0.913448	0.682183	0.856358	0.843863	1.02885
A0A369K542	0.350726	0.376111	0.390414	0.395316	3.13444	3.5315	3.92439	4.00461	0.379299	0.43371	0.440164	0.434184
A0A369JFB2	0.193851	0.376124	0.132288	0.170616	0.908542	1.38394	1.33654	1.27163	0.126713	0.141594	0.461867	0.12432
A0A369J8M5	0.387203	0.376708	0.339785	0.294501	0.147162	0.124061	0.154848	0.154755	0.365297	0.271466	0.225765	0.215144
A0A369K7P3	0.278638	0.377234	0.300311	1.17436	0.148089	0.154522	0.128223	0.131628	3.45369	3.33998	3.51132	2.91929
A0A369JUP1	0.347345	0.377239	0.369209	0.333446	NA	NA	NA	NA	0.521584	0.442425	0.488799	0.485956
A0A369JX45	0.588919	0.377289	0.2212	0.324958	0.0593155	0.109468	0.0759358	0.0723194	0.309715	0.435913	0.377585	0.482392
A0A369JMM2	0.589137	0.378269	0.436056	0.408809	NA	NA	NA	NA	0.218505	0.37866	0.120512	0.196844
A0A369J8J7	0.225338	0.381857	0.375694	0.274526	1.49105	1.21158	1.43011	1.06307	0.186848	0.216231	0.203116	0.211934
A0A369JCT3	0.415223	0.381934	0.287988	0.373706	0.15434	0.184225	0.201016	0.137755	0.587201	0.662028	0.725001	0.581711
A0A369JTV6	0.368898	0.382017	0.367925	0.361295	0.135754	0.17369	0.176996	0.120265	0.139891	0.152259	0.116518	0.15696
A0A369KCK7	0.638466	0.382587	0.536228	0.519672	NA	NA	NA	NA	0.810671	0.835463	0.681587	0.808989
A0A369JQN6	0.263871	0.382902	0.383956	0.384429	NA	NA	NA	NA	0.201665	0.266451	0.263147	0.272718
A0A369K2K6	0.275243	0.384033	0.301993	0.446658	NA	NA	NA	NA	0.372518	0.457907	0.388124	0.309811
A0A369K5F2	0.463312	0.385459	0.764568	0.303016	NA	NA	NA	NA	0.264407	0.271343	0.243083	0.333125
A0A369JLE7	0.475874	0.389288	0.52366	0.390698	0.760339	1.08123	1.01093	0.566182	0.400477	0.456454	0.482525	0.35718
A0A369J564	0.414415	0.389468	0.337823	0.425693	NA	NA	NA	NA	0.283191	0.253879	0.179075	0.342646
A0A369K5M9	0.498414	0.390572	0.413553	0.328613	NA	NA	NA	NA	NA	NA	NA	NA
A0A369JAT5	0.444166	0.392719	0.740079	0.27135	6.85375	7.02284	6.47185	7.71582	1.17986	0.35977	1.11671	1.01826
A0A369JBT1	0.297036	0.393399	0.242391	0.333286	0.332558	0.0899657	0.202411	0.206305	0.124659	0.147079	0.10593	0.134943
A0A369K3C7	0.39819	0.394074	0.30852	0.333389	0.237593	0.197737	0.214003	0.314087	0.401644	0.613126	0.300181	0.37977
A0A369JW74	0.635558	0.394409	0.424701	0.412241	NA	NA	NA	NA	2.02961	1.53169	1.92111	1.90978
A0A369K211	0.3725	0.394534	0.435936	0.221777	NA	NA	NA	NA	1.13253	1.13264	1.38957	0.979799
A0A369JPL3	0.336356	0.394634	0.667292	0.441995	NA	NA	NA	NA	1.21354	1.22375	1.19267	1.24164
A0A369JCC3	0.381591	0.395445	0.330654	0.439126	NA	NA	NA	NA	0.225105	0.251547	0.212094	0.28968
A0A369JLN8	0.83126	0.39663	0.291422	0.321234	0.50023	0.502908	0.582003	0.409925	0.895347	1.12111	0.651456	0.86203
A0A369K8C5	0.409518	0.397773	0.45072	0.348173	NA	NA	NA	NA	0.58871	0.571895	0.684403	0.399524
A0A369K9W4	0.385935	0.397887	0.440872	0.436879	NA	NA	NA	NA	0.181495	0.249489	0.128443	0.214318
A0A369J4H3	0.272995	0.398749	0.340454	0.423797	1.08432	1.05627	1.06778	1.08407	0.330119	0.357658	0.230971	0.245661
A0A369J9S5	0.240652	0.399253	0.251128	0.119756	0.396982	0.237139	0.442279	0.376916	0.494427	0.334281	0.247024	0.522908
A0A369JGT3	0.514896	0.400589	0.497077	0.467833	1.16052	1.20453	1.62718	1.27158	0.137448	0.178322	0.209059	0.0997493
A0A369K3Z5	0.533967	0.403196	0.353996	0.142729	NA	NA	NA	NA	0.772969	0.872675	0.94389	0.0799106
A0A369JQG5	0.314102	0.403241	0.31884	0.406866	NA	NA	NA	NA	0.322106	0.307077	0.176208	0.363347
A0A369JQW9	0.318637	0.404295	0.40261	0.313119	0.291789	0.177581	0.219091	0.273599	NA	NA	NA	NA
A0A369JWU1	0.544606	0.404532	0.589077	0.363492	NA	NA	NA	NA	0.407351	1.03871	1.02779	0.953228
A0A369K6C1	0.475897	0.408423	0.509538	0.45735	NA	NA	NA	NA	0.360705	0.367186	0.389825	0.357666
A0A369JND3	0.693373	0.408558	0.562033	0.689373	0.145506	0.154308	0.143601	0.137278	0.142872	0.234437	0.301837	0.345723
A0A369JYN3	0.289073	0.409322	0.349573	0.333636	0.44236	0.487867	0.46818	0.290386	0.494062	0.712154	0.516831	0.455918
A0A369JTG5	0.412972	0.409398	0.446386	0.340912	0.667735	0.860633	1.00563	0.790354	0.535889	0.485483	0.534776	0.383338
A0A369K897	0.403587	0.410872	0.824075	0.874571	NA	NA	NA	NA	2.26676	2.10115	0.470142	1.43443
A0A369JGX8	1.14545	0.411171	0.486869	0.584124	13.6087	15.4049	13.2091	14.4219	1.36352	1.45272	1.48515	1.68458
A0A369JP43	0.194386	0.411616	0.464993	0.227427	4.03555	3.85776	3.48262	3.3885	0.238126	0.176994	0.228367	0.263952
A0A369JS60	0.552843	0.412277	0.37215	0.353474	0.429177	0.862742	0.338101	0.849801	0.234985	0.170252	0.245385	0.200776
A0A369JGG3	0.296063	0.413169	0.316202	0.533252	0.107303	0.164559	0.0920472	0.129758	0.492686	0.669437	0.801702	0.70426
A0A369J751	0.361729	0.414634	0.209114	0.492345	2.57244	3.0464	2.60795	3.15249	2.32005	1.53149	1.90731	2.25816
A0A369K7V2	0.216482	0.417	0.24121	0.336012	1.82767	3.39876	3.0019	2.51292	0.135525	0.408757	0.404521	0.366274
A0A369JR45	0.324018	0.417463	0.307245	0.417778	0.628984	0.794001	0.753341	0.664818	0.633383	0.773146	0.590006	0.998673
A0A369JMN3	0.451669	0.417876	0.624685	0.330867	NA	NA	NA	NA	0.492714	0.372981	0.395868	0.316339
A0A369KE11	0.427357	0.420244	0.531574	0.495305	0.619702	0.662255	0.473253	0.632284	0.79835	0.49906	0.667876	0.52618
A0A369K3T8	0.509155	0.420391	0.3936	0.555116	0.113543	0.104719	0.144595	0.149483	0.619646	0.703231	0.618259	0.669982
A0A369JJD6	0.41797	0.42042	0.420908	0.446436	0.208735	0.258918	0.219267	0.202024	0.361175	0.566968	0.371113	0.453119
A0A369JGN9	0.456363	0.422992	0.343065	0.311624	0.332455	0.176362	0.325601	0.25576	0.73675	1.37655	1.26145	1.22946
A0A369K6K3	0.22369	0.424446	0.241503	0.255883	5.38477	5.58875	4.83496	3.5934	0.954893	0.184362	0.126745	0.127794
A0A369K0H6	0.455371	0.42465	0.304496	0.37129	NA	NA	NA	NA	0.75805	0.57963	0.573312	0.460007
A0A369JP39	0.351587	0.425574	0.477451	0.340338	NA	NA	NA	NA	0.415192	0.42381	0.417245	0.445767
A0A369JQP5	0.473835	0.427133	0.49577	0.309269	NA	NA	NA	NA	0.440209	0.217545	0.249127	0.28023
A0A369K020	0.419454	0.427885	0.473156	0.370168	9.9397	8.76683	9.56546	8.63991	0.334411	0.3513	0.117157	0.247952
A0A369JE91	0.77093	0.429712	1.04647	0.283417	NA	NA	NA	NA	1.66445	1.52529	1.50726	1.76039
A0A369KCZ8	0.312862	0.429873	0.339489	0.321194	2.6877	2.80012	3.17656	1.94051	0.227252	0.216203	0.201283	0.183575
A0A369JZ34	0.42888	0.433377	0.327974	0.312663	1.30767	1.45036	1.40809	1.45326	1.1431	1.53961	1.65043	1.19769
A0A369JEP8	0.42689	0.434926	0.496755	0.31432	0.111534	0.0942902	0.185772	0.0900625	1.20369	1.77822	1.51629	1.6009
A0A369JAS2	0.814853	0.435705	0.385999	0.553005	0.12237	0.118022	0.234762	0.123006	0.322722	0.196324	0.331236	0.109072
A0A369JUM6	0.718125	0.437522	0.707327	2.16292	150.763	176.705	177.398	177.42	1.42217	1.41503	1.45194	2.14317
A0A369JC20	0.644723	0.438457	0.37602	1.0368	0.304598	0.196032	0.163643	0.12651	2.90555	2.87894	3.15343	3.37976
A0A369K771	0.359367	0.438991	0.664168	0.388999	0.534758	0.367774	0.349346	0.593018	0.269599	0.223794	0.305609	0.27975
A0A369JDF8	0.522142	0.439782	0.703279	0.49036	5.34964	5.17382	5.60442	5.13227	NA	NA	NA	NA
A0A369JEI2	0.514642	0.441445	0.437922	0.544062	0.143993	0.253867	0.188264	0.183727	0.48801	0.826344	0.516143	0.543779
A0A369KCE8	0.447091	0.441687	1.22627	0.375619	2.70192	3.00196	2.62222	2.76424	1.01128	0.897404	1.12142	0.937137
A0A369JBR3	0.420691	0.44175	0.347199	0.366846	0.0933881	0.147784	0.0985375	0.112362	0.18453	0.203282	0.139614	0.309363
A0A369K846	1.25763	0.441805	1.09035	0.909712	0.670775	0.580525	0.604129	0.534744	0.845841	0.893768	0.845378	0.877411
A0A369K7L6	0.234269	0.442286	0.394221	0.425232	1.55795	1.65862	1.60734	1.93323	0.234811	0.475298	0.453501	0.407368
A0A369KDX8	0.252633	0.443036	0.114242	0.457261	NA	NA	NA	NA	0.777559	0.761473	0.954167	0.752927
A0A369JCX5	0.375654	0.44337	0.482435	0.446938	0.618687	0.401273	0.331972	0.268091	1.22753	1.25682	1.7509	1.54147
A0A369KEJ7	0.438398	0.444008	0.331804	0.516833	0.283424	0.17297	0.218175	0.313461	0.0473723	0.0681963	0.0600677	0.033465
A0A369JG55	0.215721	0.444726	0.614744	0.43223	NA	NA	NA	NA	0.486694	0.528224	0.696842	0.527361
A0A369K0J6	0.212416	0.445711	0.158339	0.361179	7.84206	8.38856	8.37636	7.87013	0.546688	0.509409	0.723515	0.686969
A0A369JTN7	0.412802	0.44677	0.429351	0.480917	3.59026	3.16301	3.46239	3.98407	2.71163	3.63221	3.53893	3.76231
A0A369K7R2	0.323487	0.449134	0.298653	0.256612	NA	NA	NA	NA	NA	NA	NA	NA
A0A369IZL9	0.130966	0.449566	0.117039	0.0802154	NA	NA	NA	NA	0.143077	0.212524	0.317023	0.0288651
A0A369J4T7	0.495545	0.450707	0.540858	0.450626	2.63898	2.24942	2.46163	2.68741	0.415144	0.350431	0.56723	0.408778
A0A369IYQ5	0.394644	0.452605	0.779593	0.383874	0.292569	0.21115	0.190886	0.296617	0.80364	1.11618	1.01238	1.22231
A0A369KCB7	0.633907	0.453166	0.465708	0.385308	0.234021	0.188533	0.198203	0.097052	0.269747	0.322035	0.266366	0.223881
A0A369JY95	0.395604	0.454993	0.442655	0.382709	NA	NA	NA	NA	0.590961	0.787956	0.511881	0.620858
A0A369JZ07	0.479843	0.455952	0.529716	0.581904	1.21516	0.494813	0.751129	0.228023	1.02255	1.07119	1.03832	0.911563
A0A369K7A9	2.3585	0.460554	2.2852	2.23896	7.82105	7.66626	8.52503	7.3815	1.43909	1.33177	1.37359	1.28093
A0A369K5Z3	0.463314	0.462493	0.341968	0.253466	NA	NA	NA	NA	0.282013	0.284319	0.26962	0.493522
A0A369JTX3	0.25268	0.462494	0.147068	0.33561	0.585182	0.715747	0.692411	0.734356	NA	NA	NA	NA
A0A369JI35	0.316169	0.464247	0.316844	0.273383	2.22604	2.32495	2.0132	1.72758	0.228647	0.356926	0.46349	0.283869
A0A369JUI7	0.513009	0.465757	0.540122	0.471379	0.198204	0.263633	0.257425	0.206623	0.178095	0.121614	0.127908	0.191894
A0A369JVV5	0.41277	0.467118	0.575032	0.406852	0.308019	0.294245	0.436068	0.358976	0.408734	1.11263	1.12405	0.942979
A0A369JU32	0.838019	0.467626	0.321781	0.437393	NA	NA	NA	NA	1.82793	1.65266	0.438928	0.55158
A0A369JSD1	0.285358	0.468134	0.505387	0.33153	0.0292685	0.224997	0.0247912	0.0175534	0.90988	0.180948	1.0188	0.836006
A0A369JGA5	0.575267	0.46863	0.667253	0.509675	0.241848	0.247815	0.317351	0.340839	0.499211	0.437717	0.399267	0.286469
A0A369JN14	0.471735	0.46986	0.375843	0.444674	0.740497	0.550775	0.678536	0.519851	0.160999	0.205658	0.248878	0.214029
A0A369K9R6	0.782808	0.471196	0.56257	0.12181	NA	NA	NA	NA	0.937345	0.774782	0.642018	0.537968
A0A369JKX4	0.316084	0.471674	0.357452	0.357388	0.408091	0.846851	0.768431	0.42224	0.44836	0.507426	0.629018	0.640698
A0A369JKU8	0.932869	0.472741	0.167878	0.749615	0.56391	0.460132	0.457691	0.463028	1.28206	1.22456	1.48346	1.49856
A0A369K2W1	0.5409	0.474958	0.421839	0.465813	0.760613	1.63841	1.02233	2.12702	0.265356	0.30584	0.230754	0.278068
A0A369JN30	0.333684	0.477635	0.328499	0.343426	1.47152	1.49941	1.32698	1.53826	0.598532	0.453026	0.403805	0.474383
A0A369JKF9	0.49354	0.478665	0.535773	0.30577	0.605119	0.663382	0.652416	0.487306	0.213868	0.560908	0.0857928	0.0417858
A0A369J4V0	0.433034	0.47871	0.487032	0.374064	0.376829	1.40064	0.341989	0.327755	2.61234	2.00089	2.18572	1.75635
A0A369KAE3	0.822484	0.479975	0.22198	0.394074	15.1743	16.4156	17.3316	15.7586	0.67845	0.928774	0.52	0.848777
A0A369JL99	0.422411	0.480126	0.625946	0.653583	3.27719	2.01665	2.83446	1.17062	0.499682	0.627445	0.473283	0.424235
A0A369JS22	0.453742	0.481348	0.33402	0.494802	NA	NA	NA	NA	0.898743	0.595264	0.356054	0.426153
A0A369J7B4	0.505081	0.482338	0.37538	0.59816	0.113266	0.152752	0.0779396	0.122694	0.963503	0.928319	0.547872	0.664625
A0A369K1T3	0.435187	0.484297	0.429095	0.459637	NA	NA	NA	NA	0.621402	0.646627	0.536619	0.639217
A0A369JLM9	0.567064	0.485225	0.6497	0.391956	1.81178	1.88489	1.3366	1.64408	0.184563	0.197679	0.418106	0.121269
A0A369K6V5	0.428155	0.485851	0.400954	0.507886	6.03074	5.48576	5.85596	5.75795	0.764901	0.707725	0.840916	0.773661
A0A369JLV6	0.344535	0.487368	0.498386	0.345332	NA	NA	NA	NA	0.580033	0.406956	0.493294	0.472672
A0A369J2C9	0.910742	0.487938	0.698144	0.656706	0.300149	0.433117	0.286473	0.403997	1.09291	0.745549	0.822007	0.728785
A0A369JE93	0.562572	0.488712	0.696992	0.411423	NA	NA	NA	NA	0.914018	0.405229	0.187548	0.652475
A0A369JL29	0.61485	0.489552	0.478737	0.543643	0.599687	1.15862	0.839953	0.86841	NA	NA	NA	NA
A0A369JV52	0.577659	0.490698	0.42338	0.290474	NA	NA	NA	NA	0.929533	0.733097	0.857718	0.899155
A0A369J8J8	1.39182	0.493023	1.28964	0.842744	NA	NA	NA	NA	0.88511	0.992469	1.04858	0.994802
A0A369JXY3	0.70713	0.494023	0.468079	0.701434	0.572536	0.26814	0.25818	0.317007	0.763125	0.844358	0.786825	0.861402
A0A369K3M9	0.413809	0.494564	0.526014	0.41596	0.153723	0.105618	0.206428	0.164117	0.347579	0.461811	0.339361	0.317987
A0A369JXR8	0.47171	0.496281	0.429664	0.417626	0.924167	0.683577	0.959915	0.887765	0.514629	0.34597	0.305469	0.314366
A0A369JXC1	0.62666	0.497603	0.580736	0.622267	NA	NA	NA	NA	0.537605	0.639716	0.472635	0.3117
A0A369JQI1	0.359427	0.498707	0.552347	0.42296	0.120263	0.197724	0.083829	0.0937691	1.64557	1.61107	1.48548	1.53232
A0A369K1I6	0.488641	0.49877	0.402156	0.224014	1.0787	0.887565	0.99556	1.19758	0.238669	0.253109	0.383169	0.239961
A0A369K215	0.443009	0.499728	0.685363	0.54492	5.18548	4.88334	4.92488	5.09943	0.605707	0.556546	0.548945	0.778152
A0A369JQD5	0.480234	0.501159	0.43856	0.393121	0.639687	0.425204	0.296177	0.248757	1.09608	0.909462	0.811896	0.973697
A0A369J8I9	1.64014	0.503412	1.8774	1.8126	4.92078	4.92238	4.48588	4.85983	0.306161	0.273235	0.238406	0.349346
A0A369JU78	0.615014	0.503459	0.566945	0.468036	NA	NA	NA	NA	1.26673	0.793481	1.19156	1.19142
A0A369JX66	0.564218	0.504502	0.531276	0.426541	1.4647	1.41461	0.700655	0.769617	0.399416	0.335052	0.327496	0.375772
A0A369JNM2	1.07596	0.505814	0.955601	1.21651	NA	NA	NA	NA	1.47866	1.39651	1.39088	1.52009
A0A369J1V1	0.394692	0.506345	0.451241	0.486596	0.482069	0.542869	0.486894	0.518272	0.374671	0.456074	0.350153	0.432329
A0A369JYT6	0.504232	0.50717	0.584531	0.572895	23.1556	25.1996	23.3374	20.0578	0.502069	0.0132343	0.3247	0.475679
A0A369K7B8	0.375421	0.507358	0.558517	0.349873	6.10579	7.21979	6.59	6.48352	0.354425	0.36095	0.464407	0.341247
A0A369K3V2	0.558862	0.507464	0.622859	0.486507	0.109915	0.204931	0.223207	0.0824584	0.201139	0.345038	0.209454	0.251974
A0A369JR83	0.448487	0.509653	0.274772	0.286877	0.0250734	0.0298972	0.0253572	0.0328692	0.354533	0.553767	0.512039	0.323324
A0A369K9X8	0.487614	0.51036	0.538154	0.490278	0.1407	0.179345	0.0980415	0.129161	0.529339	0.540587	0.372608	0.585176
A0A369KCI6	0.580465	0.510956	0.502325	0.455271	0.134697	0.109267	0.105269	0.124675	0.746017	0.833973	0.629838	0.608582
A0A369K5Z5	0.445147	0.512475	0.495955	0.419982	0.123094	0.121328	0.133402	0.0492615	1.64792	1.81084	1.70566	2.0122
A0A369KBL7	0.516891	0.513496	0.451319	0.752635	2.9661	3.17572	3.77787	3.48908	0.167302	0.385108	0.291533	0.0347828
A0A369JFN0	0.328334	0.51363	0.411888	0.505439	0.483801	0.391841	0.228865	0.278289	0.628695	0.569559	0.683709	0.643441
A0A369JYK2	0.453659	0.514571	0.450736	0.519908	4.48044	4.98032	4.23135	5.53861	0.145046	0.11943	0.147571	0.176057
A0A369J8C2	0.329559	0.515813	0.292043	0.336383	9.05571	9.90335	8.82611	9.88121	2.25979	2.86196	2.06574	2.07006
A0A369K2N9	0.638956	0.516023	0.0888112	0.388866	0.364692	0.629568	0.771848	0.621832	0.412911	0.330367	0.413538	0.335518
A0A369K8H1	0.299714	0.516115	0.249993	0.279145	0.693182	0.571228	0.657888	0.349839	NA	NA	NA	NA
A0A369KE31	0.538552	0.519929	0.422052	0.468461	NA	NA	NA	NA	0.300797	0.343699	0.279451	0.287363
A0A369KA72	0.441634	0.522314	0.471943	0.509372	NA	NA	NA	NA	0.542275	0.579101	0.502947	0.468262
A0A369K4T9	0.474175	0.522898	0.929161	0.77151	1.34515	1.20346	1.23182	0.460301	1.07234	0.57949	1.06971	1.00789
A0A369JGZ5	0.543088	0.525394	0.504098	0.348161	NA	NA	NA	NA	0.929594	0.880466	0.883237	0.726148
A0A369K9D3	0.323178	0.526642	0.67432	0.408198	NA	NA	NA	NA	0.399258	0.525436	0.627448	0.56806
A0A369JF28	0.455288	0.526666	0.382766	0.473069	NA	NA	NA	NA	0.21497	0.259421	0.21819	0.140164
A0A369KBJ9	0.850768	0.526777	0.639308	0.810918	NA	NA	NA	NA	2.60229	2.82797	3.95299	2.48934
A0A369JYX3	0.504516	0.527019	0.430543	0.544115	NA	NA	NA	NA	0.89054	0.934566	0.750643	0.95889
A0A369J835	0.198903	0.528168	0.254055	0.117991	NA	NA	NA	NA	0.688485	0.928106	0.543459	0.902606
A0A369J956	0.596085	0.529924	0.488369	0.419098	0.879501	0.928712	0.641885	0.642481	0.329029	0.435168	0.239683	0.205712
A0A369J1K9	0.565608	0.530097	0.547452	0.840993	NA	NA	NA	NA	0.610384	0.566467	0.543033	0.882897
A0A369JV75	0.463076	0.530695	0.731757	0.442853	0.33361	0.415155	0.688176	0.635435	0.327576	0.400304	0.246372	0.330916
A0A369KCG7	0.507869	0.530876	0.859735	0.944177	5.17237	4.32252	3.70666	5.51015	2.07727	1.25394	0.77771	0.809249
A0A369J5B2	0.311475	0.532116	0.319413	0.408385	3.38899	3.37746	3.23445	3.06738	0.894772	1.00287	1.12298	0.936315
A0A369KAH3	0.676098	0.532455	0.644294	0.612374	0.913725	0.64048	0.701238	0.811519	0.628053	0.835366	0.918911	0.949437
A0A369JP87	0.648271	0.532912	0.773019	0.611445	0.636826	0.721325	0.231024	0.811871	0.440721	0.520751	0.38954	0.286842
A0A369JW65	0.548372	0.533127	0.651635	0.348819	1.09698	0.617622	0.884331	0.973704	0.0247238	0.148062	0.0425667	0.0305864
A0A369JLU2	0.503545	0.534054	0.615229	0.808709	NA	NA	NA	NA	2.27187	2.34047	2.08311	2.54937
A0A369JJM0	0.458451	0.534295	0.356013	0.363898	0.108683	0.146174	0.158807	0.130542	2.05332	2.42287	2.85458	2.10277
A0A369JC19	0.678726	0.535852	0.674138	0.723091	0.81517	0.664223	0.718194	0.673377	0.775228	0.647228	0.643458	0.556023
A0A369JJY9	0.472282	0.536482	0.429071	0.376768	0.0188735	0.0194094	0.0187169	0.0267956	0.640008	0.738913	0.494477	0.673616
A0A369JWI8	0.459666	0.538091	0.385628	0.436087	NA	NA	NA	NA	1.30615	1.34098	1.1109	1.27745
A0A369K026	0.553437	0.539163	0.73855	0.630207	1.28491	0.812422	0.820259	0.803778	0.711058	0.72637	0.652506	0.841964
A0A369KAS3	0.633939	0.539322	0.690346	0.829435	0.679345	0.270573	0.45334	0.589245	1.18989	1.11224	1.21877	0.713483
A0A369JUL7	0.440148	0.540234	0.50544	0.434201	0.106808	0.0771325	0.0826115	0.106399	0.919965	1	0.801868	0.725956
A0A369JQ00	0.560856	0.540364	0.465383	0.37966	NA	NA	NA	NA	0.453345	0.464691	0.451995	0.442858
A0A369J8V8	0.499107	0.541292	0.432405	0.409335	1.28455	0.774877	1.13326	1.04067	1.12158	1.24918	1.04347	1.01859
A0A369J7D5	0.393337	0.542365	0.495262	0.280515	0.173949	0.290442	0.203819	0.161245	0.301464	0.324211	0.293668	0.340438
A0A369JWP7	0.636937	0.542732	0.438623	0.602857	3.65226	3.82853	3.91227	3.99075	1.07699	1.01051	1.27018	1.30408
A0A369JV27	0.599182	0.543257	0.554636	0.804221	2.35686	2.04522	2.13539	2.11331	0.979313	1.11394	1.10009	0.697982
A0A369K684	0.589093	0.544039	0.601945	0.530954	NA	NA	NA	NA	0.758011	0.535113	0.795747	0.894967
A0A369JP22	0.347465	0.547324	0.134752	0.312898	3.76694	4.56897	3.62505	4.42962	0.143563	0.159827	0.146306	0.169118
A0A369JWZ9	0.677756	0.547818	1.02312	0.983456	NA	NA	NA	NA	2.18106	2.18253	2.08761	1.8375
A0A369JG59	0.520434	0.548084	0.562585	0.66761	0.805235	0.724667	0.244559	0.877981	2.29531	2.78089	2.43572	2.28432
A0A369K7R6	0.362217	0.549086	0.598668	0.494012	1.07328	1.37171	1.29407	1.17335	0.74742	0.595931	0.502654	0.629263
A0A369K939	0.342302	0.551831	0.442881	0.39199	NA	NA	NA	NA	0.540197	0.608318	0.561059	0.741719
A0A369J712	0.453305	0.552409	0.632684	0.541754	1.67981	2.58919	1.62644	1.51992	0.358257	0.543488	0.403408	0.711796
A0A369KDS1	0.460794	0.553484	0.425717	0.537178	0.219786	0.274205	0.244387	0.134348	0.389371	0.349876	0.279074	0.328286
A0A369JU20	0.468084	0.554443	0.461914	0.529872	13.7025	13.1579	13.5608	14.2522	0.210712	0.255053	0.198197	0.234987
A0A369K592	0.49031	0.555192	0.413691	0.487598	0.313169	0.058212	0.359108	0.214395	0.669282	0.653	0.728636	0.423155
A0A369K8P7	0.562572	0.555889	0.546499	0.648955	0.621271	0.460015	0.466111	0.436912	0.109839	0.148053	0.102715	0.0877023
A0A369JNF8	0.495327	0.556119	0.421341	0.452976	1.37648	0.664477	0.918478	1.22569	0.176708	0.192844	0.200901	0.343004
A0A369JQ54	0.535717	0.5572	0.474354	0.383713	0.182857	0.255446	0.259466	0.280311	2.59219	2.25373	2.83769	2.13576
A0A369JDB4	0.532819	0.55845	0.447726	0.466456	0.342725	0.349706	0.239822	0.538388	0.421529	0.59867	0.361095	0.315757
A0A369J2Z6	0.606788	0.558638	0.587261	0.590269	1.05512	1.16633	1.01243	1.2656	NA	NA	NA	NA
A0A369K1J0	0.245884	0.558861	0.307619	0.204355	1.75989	2.16881	1.33266	1.54558	1	1.43039	1.05989	0.632828
A0A369JQH6	0.53975	0.563262	0.72068	0.800154	3.10225	2.47411	4.28637	1.94486	0.1546	0.23992	0.183124	0.03109
A0A369JMP7	0.299995	0.566373	0.894002	1.02123	0.964992	0.947303	0.975841	1.04352	3.14426	3.1633	3.08741	3.25863
A0A369JVD1	0.871008	0.566596	0.121731	0.497867	5.32231	8.74667	4.66694	10.6613	0.814247	0.657207	0.719287	0.773639
A0A369K2J9	0.283813	0.572251	0.358496	0.272221	0.0408021	0.0629172	0.0428798	0.111949	0.263498	0.211885	0.362154	0.142932
A0A369K5R2	1.6521	0.572492	1.58851	1.3822	4.41162	4.65838	4.40809	4.5199	1.74736	0.385684	1.49527	1.5556
A0A369JIT8	0.508599	0.57274	0.511138	0.553598	NA	NA	NA	NA	0.63083	0.685067	0.624765	0.819123
A0A369IY25	0.462066	0.580753	0.411327	0.572761	NA	NA	NA	NA	0.195296	0.108865	0.3038	0.121425
A0A369K5B3	0.44187	0.581783	0.57554	0.571016	0.187261	0.168578	0.0903214	0.193154	0.60721	0.662368	0.615791	0.738208
A0A369KAM4	0.503571	0.585887	0.468561	0.458593	4.19957	2.52944	3.6371	3.785	0.638753	0.365059	0.712153	0.659094
A0A369JZL4	0.501985	0.59285	0.389213	0.608225	NA	NA	NA	NA	0.294806	0.444186	0.342129	0.351636
A0A369JIT1	0.519744	0.593323	0.500706	0.717708	NA	NA	NA	NA	0.414283	1.14887	1.32087	1.24835
A0A369J2R2	0.48485	0.593542	0.44718	0.591307	0.200722	0.251011	0.270063	0.213222	0.188198	0.255288	0.187197	0.18056
A0A369J3E7	0.707504	0.593914	0.653101	0.577407	6.8448	8.62822	7.23493	9.28373	0.385829	0.563146	0.430002	0.448763
A0A369JC36	0.451898	0.594065	0.438224	0.551586	1.11712	0.950576	0.775548	0.711938	0.303553	0.310049	0.383825	0.486107
A0A369K4I0	0.340698	0.598757	0.471652	0.43217	1.61828	1.26593	1.58861	1.33916	0.310857	0.347434	0.35406	0.328067
A0A369JFC9	0.533862	0.599237	1.1569	0.711885	2.04737	1.91532	1.92359	1.36695	0.369561	0.45232	0.462931	0.350865
A0A369K8J7	0.158937	0.600453	0.833153	0.17645	1.35109	1.19116	1.3502	1.28302	1.46448	0.961924	0.926242	2.40542
A0A369K2Y3	0.548516	0.60393	0.500499	0.718833	0.678045	0.663639	0.728233	0.763491	1.30037	1.3001	1.33012	0.81495
A0A369K1V0	0.792521	0.604474	0.362685	0.660088	11.8655	10.9663	11.6067	11.0217	0.466677	0.66046	0.873634	0.448311
A0A369JU43	0.59988	0.604506	0.53333	0.507201	NA	NA	NA	NA	0.754967	0.765031	0.609819	1.00559
A0A369KB53	0.365958	0.606528	0.399921	0.375241	0.284416	0.392844	0.2544	0.671301	0.149743	0.2042	0.142314	0.148078
A0A369JYB9	1.01691	0.606693	0.587751	0.95388	NA	NA	NA	NA	0.741941	1.42055	1.17629	0.514327
A0A369K213	0.355818	0.607179	1.1265	0.894892	0.210798	0.256074	0.499065	0.488811	1.58955	1.54384	1.27479	1.71751
A0A369J2Q8	0.597791	0.612069	0.588394	0.486922	3.77727	4.84769	4.42227	4.94657	0.954161	0.928384	0.9152	1.06172
A0A369JF77	0.500207	0.612117	0.601211	0.671751	11.4013	11.4038	11.3289	13.1937	0.337971	0.179775	0.180623	0.131924
A0A369J5E3	0.718964	0.612626	0.554238	0.701324	0.403524	0.415959	0.314931	0.326532	0.959962	0.727943	0.777876	0.85604
A0A369J852	0.598824	0.613039	0.747829	0.574781	0.153986	0.156476	0.203009	0.172122	NA	NA	NA	NA
A0A369JBV2	0.719795	0.616538	0.8136	0.627848	0.884659	0.953823	1.01217	0.997993	0.532053	0.752158	0.609138	0.525094
A0A369K812	0.566058	0.619591	0.416226	0.556859	NA	NA	NA	NA	2.32021	2.43822	2.12326	2.52286
A0A369JCI5	0.181524	0.619715	0.481101	0.831606	NA	NA	NA	NA	0.986593	1.17184	1.44191	1.06103
A0A369JE01	1.45254	0.620382	1.04033	1.14044	4.32481	4.15096	4.09159	3.95389	0.563567	0.588992	0.869727	0.624212
A0A369IY85	0.556237	0.621414	0.454598	0.487481	NA	NA	NA	NA	0.326572	0.369166	0.354597	0.33219
A0A369K3R0	0.631921	0.623691	0.476593	0.527627	0.113978	0.431466	0.301479	0.326161	0.425167	0.609047	0.54694	0.43948
A0A369JJC8	0.879795	0.624485	0.465456	0.815819	0.10834	0.0781472	0.282575	0.213147	1.60346	2.0694	1.35967	1.11788
A0A369JEU1	0.578336	0.625922	0.787063	0.504198	NA	NA	NA	NA	0.182304	0.154356	0.263032	0.195679
A0A369J5L8	0.870206	0.627631	0.637863	0.532471	NA	NA	NA	NA	0.459736	0.541768	0.385664	0.433748
A0A369JNV0	0.531898	0.629474	0.618306	0.706077	3.51622	4.45837	1.89808	4.20346	0.489812	0.448835	0.420411	0.372616
A0A369KDX0	0.435444	0.636931	0.478268	0.396738	3.34863	3.10943	3.04093	3.63687	0.593569	0.71047	0.432444	0.5247
A0A369J6N5	0.624108	0.637731	0.57605	0.574134	1.22905	1.0365	0.848006	0.970224	1.51469	1.44583	1.37799	1.11499
A0A369KAR5	0.709896	0.63881	0.709519	0.681063	0.541038	0.361907	0.423544	0.479362	1.37285	1.03655	1.12972	1.04451
A0A369JXA1	0.688187	0.641768	0.301457	0.420656	0.721036	0.719845	0.953805	0.977413	0.341578	0.556097	0.264233	0.229872
A0A369K359	0.816019	0.642179	0.955325	0.605113	2.39489	2.14808	2.42597	3.79439	0.540415	0.51639	0.479469	0.603181
A0A369JQR8	1.03916	0.642762	1.27543	0.796463	1.01022	1.56863	1.44767	1.53757	0.79899	1.31132	0.998642	0.552519
A0A369K3G1	0.592888	0.645138	0.65482	0.632799	NA	NA	NA	NA	0.424036	0.488296	0.325546	0.552681
A0A369JJR4	0.46418	0.645149	0.276118	0.386809	NA	NA	NA	NA	1.02955	1.08457	0.999196	1.33807
A0A369JSC4	0.579182	0.646426	0.628449	0.426148	NA	NA	NA	NA	1.24844	1.52122	1.23399	1.5442
A0A369JCR2	0.335199	0.654322	0.45561	0.684672	0.121648	0.25222	0.169851	0.125555	0.179541	0.500545	0.603662	0.399077
A0A369KA60	0.665479	0.65461	0.641871	0.676289	0.168493	0.561808	0.226648	0.233647	0.592456	0.678642	0.463601	0.43313
A0A369KFU7	0.855493	0.65741	0.515961	0.741125	0.197744	0.215946	0.346192	0.38576	0.696806	0.428162	0.55017	0.709246
A0A369J462	0.743015	0.657723	0.678756	0.537644	0.138258	0.107945	0.122285	0.168025	0.630223	0.455922	0.883221	0.952634
A0A369J9V6	0.647248	0.65831	0.840159	0.185558	NA	NA	NA	NA	1.0414	1.53632	1.01652	0.799604
A0A369JH37	0.843118	0.658658	0.811157	0.703642	0.0420436	0.0611186	0.0721174	0.0703386	1.24889	1.22256	1.44112	1.57182
A0A369J3H1	0.314478	0.658909	0.298455	0.679746	0.875132	1.20614	0.836721	2.97941	0.912757	1.17203	0.893497	0.731022
A0A369K357	0.771746	0.660222	1.41292	1.00326	0.439608	0.512789	0.464801	0.346683	0.123253	0.145645	0.0713082	0.419307
A0A369K4U8	0.373994	0.661001	0.397244	0.388662	0.442211	0.0609748	0.376547	0.330358	0.409896	0.711548	0.462943	0.624615
A0A369JZR5	0.659248	0.661079	0.512373	0.514087	2.60286	4.86458	2.6722	3.19068	0.215453	0.372861	0.316949	0.366612
A0A369JCV1	0.659476	0.664005	0.62789	0.607991	0.231825	0.263715	0.27143	0.272727	0.797922	0.441535	0.457935	0.746798
A0A369JDH2	0.696429	0.670109	0.588692	0.57109	0.522599	0.515168	0.407923	0.512248	0.879396	0.754775	0.771852	0.871368
A0A369JBY3	0.3735	0.672968	0.39187	0.436016	15.5239	14.3361	12.1455	13.7057	0.359937	1.15686	0.507573	1.10655
A0A369JMT3	0.905535	0.675698	0.791938	0.703781	0.268023	0.380391	0.63913	0.277888	2.09463	1.91999	1.51327	0.865717
A0A369K986	0.682654	0.67678	0.952233	1.51892	NA	NA	NA	NA	1.31403	1.60102	1.86653	2.2536
A0A369K7M9	1.07242	0.677839	0.934504	0.654578	0.255699	0.276283	0.25982	0.257357	0.888894	0.810054	0.758775	0.878516
A0A369JHI1	0.767891	0.680199	0.696869	0.811209	NA	NA	NA	NA	1.65929	1.65408	0.655844	2.03091
A0A369JG94	0.631475	0.680654	0.689588	0.551844	10.8065	8.71949	10.4622	10.4097	0.829062	0.820004	0.770346	0.939918
A0A369JR82	0.709647	0.681135	0.918577	0.560074	0.476028	0.201864	0.883181	1.25804	0.628107	0.653188	0.652339	0.853322
A0A369K1D1	0.683571	0.681238	0.73031	1.05641	3.36243	1.84586	2.33316	2.13105	0.808993	1.00573	0.652552	1.13005
A0A369JJP1	0.823657	0.681358	0.882243	0.725639	6.18353	5.17978	6.43408	6.67799	0.750736	0.634831	0.714029	1.21274
A0A369JDB3	0.529518	0.684048	0.527335	0.564354	0.347803	0.719484	0.769322	0.688416	0.504301	0.438573	0.42039	0.314537
A0A369K248	0.866726	0.684316	0.742087	0.893539	1.5548	1.44532	2.15146	1.64869	0.391229	0.422467	0.423706	0.446394
A0A369JIU0	0.669567	0.686014	0.405203	0.59331	0.137528	0.100186	0.112552	0.102873	2.80173	2.42116	2.69214	3.06548
A0A369JTN5	0.605882	0.687354	0.416069	0.680854	0.956032	1.09773	0.846012	1.10021	0.378843	0.173695	0.214438	0.202724
A0A369K8B6	0.74156	0.688283	0.85994	0.63188	1.25589	0.715466	1.352	1.3506	NA	NA	NA	NA
A0A369JYP0	0.548629	0.688285	0.26306	0.607554	NA	NA	NA	NA	1.17423	0.86322	1.02535	1.52875
A0A369JBV7	0.583127	0.692453	0.757668	0.662874	NA	NA	NA	NA	1.11226	1.01898	0.976161	1.16883
A0A369JHK2	0.49895	0.69379	0.591876	0.803142	0.140168	0.17067	0.137382	0.153954	0.838308	0.677407	0.603108	0.669464
A0A369J6Z3	0.783017	0.69555	0.789875	0.694426	0.959281	1.27714	1.17548	1.15305	0.595726	0.680484	0.557632	0.664495
A0A369JJ14	1.28753	0.69836	1.52846	0.838839	3.10432	2.72525	3.00931	2.56049	0.544765	0.66417	0.54845	0.706336
A0A369KBQ2	0.542003	0.699517	0.386455	0.626304	13.4007	13.6369	14.5922	14.1606	0.211904	0.241931	0.233936	0.211751
A0A369JRX6	0.398541	0.708159	0.411557	2.54314	0.334903	0.0985391	0.372384	0.439862	0.324403	0.678431	0.799702	0.596859
A0A369JKG5	0.637443	0.708558	0.744597	0.931243	17.974	16.2421	18.3128	16.7217	1.12483	0.773498	1.30153	1.50683
A0A369JN45	0.700002	0.709349	0.532091	0.799485	0.0977048	0.104875	0.16639	0.178271	0.824706	0.771069	0.691002	0.85698
A0A369JIA5	0.619328	0.709992	0.568998	0.38777	NA	NA	NA	NA	0.951163	0.976988	1.07493	1.10905
A0A369JJH2	0.662602	0.712337	0.810707	0.673283	NA	NA	NA	NA	1.76114	1.53291	1.66134	1.55261
A0A369KEZ2	0.816456	0.714617	0.728279	0.818734	NA	NA	NA	NA	0.689803	0.60745	0.617459	0.511845
A0A369JA30	0.825936	0.718585	0.981419	0.740283	NA	NA	NA	NA	1.92706	1.7132	1.67205	1.64934
A0A369JPU8	0.398473	0.719979	0.75372	0.392102	0.515281	0.475362	3.44016	2.41013	0.782732	0.928651	0.896806	0.999085
A0A369JUI6	0.823312	0.722186	1.25169	1.5869	6.79949	5.77456	5.56884	5.30701	0.860811	0.974373	0.814627	1.46815
A0A369JWV9	0.671075	0.722912	0.669236	0.707355	NA	NA	NA	NA	1.58525	1.73163	1.51697	1.96378
A0A369K8E9	0.485586	0.725148	0.354678	0.571035	0.48207	0.551124	0.446399	0.462543	2.54385	0.511608	0.848193	2.35481
A0A369JP07	0.773566	0.72691	0.801226	0.568815	3.39822	4.06857	4.00989	2.73565	2.19141	2.05671	1.89552	2.06613
A0A369K244	0.724942	0.727481	0.620759	0.737544	0.461421	0.612373	0.586941	0.513217	NA	NA	NA	NA
A0A369K4E3	0.847064	0.728998	1.53946	0.905004	4.35147	4.12431	4.60437	3.80922	0.513008	0.56902	0.294355	1.13379
A0A369JGR9	0.820204	0.729505	0.909305	0.723413	2.52203	2.27376	2.15273	1.99583	0.833639	0.783637	1.04952	0.495154
A0A369JND2	0.638849	0.734809	0.755129	0.851743	2.01041	2.25358	3.58036	2.31331	0.140314	0.10795	0.108964	0.109326
A0A369J9I3	0.530156	0.735564	0.571489	1.46957	1.83064	2.06063	1.61596	1.09294	0.87377	1.03175	1.16565	0.951271
A0A369JX88	0.124074	0.738112	0.181972	0.169939	0.557603	0.489673	0.364219	0.403925	0.155332	0.149029	0.17944	0.292633
A0A369KCY4	0.951935	0.738563	0.730139	0.797615	NA	NA	NA	NA	1.07619	1.22982	0.876607	0.767838
A0A369JNX4	0.691917	0.738943	0.795664	0.827608	0.186664	0.185903	0.199017	0.239659	1.26536	1.20307	1.04017	1.30372
A0A369JB62	0.816112	0.741989	0.997497	1.12627	0.0444722	0.0386915	0.194468	0.0353099	3.01163	2.7882	2.78197	2.88771
A0A369J6V3	0.247594	0.744575	0.381833	0.56991	12.791	11.9043	12.3771	12.4765	0.715905	1.19906	0.886461	0.898776
A0A369J2Q1	0.483884	0.74459	0.853418	0.796901	5.92237	5.67283	5.88991	5.55976	0.521171	0.485726	0.510611	1.27683
A0A369K836	0.887266	0.745596	0.733465	0.930811	0.520001	0.671459	0.581533	0.700358	1.24837	1.1037	1.26517	0.430524
A0A369J3F6	0.955014	0.746983	1.18924	0.833639	1.32086	1.31071	0.96233	1.47724	1.243	1.01031	1.31464	1.20693
A0A369JD79	0.530697	0.74726	0.741146	0.46787	6.33321	3.56475	6.00936	3.36625	0.973896	0.364371	0.555422	1.1063
A0A369K064	1.45291	0.749563	0.745129	0.0945948	1.1127	0.97499	1.04986	0.77882	0.533126	0.958336	0.100225	1.01565
A0A369JGM1	0.635836	0.750161	0.459844	0.698338	NA	NA	NA	NA	0.462648	0.468864	0.429713	0.375994
A0A369JE22	0.652088	0.75075	0.607837	0.743324	2.53811	2.5415	2.61489	2.57365	0.977724	1.10815	1.0012	1.2611
A0A369K0G5	0.679518	0.751063	0.779066	1.43879	3.26987	3.31693	3.8897	6.71019	1.31391	0.516204	1.01452	0.7802
A0A369IZM0	1.73573	0.752769	1.00366	1.05797	0.455994	0.611443	0.659249	0.705968	0.846306	0.697567	0.555363	0.802045
A0A369K9Y1	0.833777	0.754555	0.717942	0.688274	0.548983	0.639508	0.547959	0.228451	0.504235	0.31241	0.64704	0.606303
A0A369JHR6	0.825392	0.754682	0.612187	1.04259	0.185331	0.162291	0.185045	0.181756	NA	NA	NA	NA
A0A369JRZ8	0.74512	0.755919	0.730631	0.417282	0.127927	0.135497	0.0920657	0.142044	1.12504	0.947348	1.24121	0.751051
A0A369JUM7	0.619202	0.758885	0.756589	0.460192	0.253488	0.213636	0.30997	0.252146	1.37515	1.38049	1.34795	1.34466
A0A369J7X5	0.838899	0.760218	0.570374	0.626055	0.802409	0.441695	0.803035	0.897536	0.533628	0.564347	0.0654075	0.0404557
A0A369JN26	0.846068	0.765401	0.606555	0.598648	1.32987	1.25854	1.30308	1.2407	0.29092	0.298041	0.24469	0.315195
A0A369K3Q2	1.30289	0.76553	1.27177	0.801886	5.63467	5.56827	5.12178	4.53311	0.123649	0.081363	0.556857	0.0557913
A0A369JZM2	0.790488	0.768791	1.40598	0.77423	3.56163	2.72369	3.04817	3.30861	1.73731	1.84781	1.77436	1.55341
A0A369K5R6	0.875392	0.769039	0.673101	0.753703	1.05182	1.26506	1.39288	1.12076	0.025609	0.702785	0.943165	0.953855
A0A369K261	0.70428	0.76931	0.846213	0.768422	0.251569	0.367755	0.195476	0.527901	NA	NA	NA	NA
A0A369J8D4	1.09009	0.770999	1.64398	1.15274	1.1918	0.928178	1.09199	1.03621	2.18176	2.53868	1.84011	1.73388
A0A369KA85	0.658171	0.775033	0.788133	0.710464	0.987818	1.14034	1.19384	0.752665	0.281526	0.499937	0.485635	0.323751
A0A369JEP2	0.745809	0.776841	0.950783	0.712996	0.71992	0.397374	0.31163	0.517191	0.868546	0.635864	0.878975	1.11054
A0A369JZB8	0.658106	0.776988	0.792972	0.740216	0.4881	0.328589	0.229077	0.214981	1.37669	0.5658	1.34091	0.922845
A0A369JKH2	0.441135	0.778664	0.458772	0.340741	3.37189	3.50101	3.69972	3.08623	0.203933	0.481739	0.643957	0.722377
A0A369K888	0.379951	0.779522	0.498988	0.403989	1.95737	2.06024	1.96558	2.04267	0.173953	0.167618	0.819871	0.0521319
A0A369J624	0.779035	0.780813	3.06604	4.29873	NA	NA	NA	NA	2.42365	2.12648	2.35892	2.33579
A0A369JI98	0.742993	0.781138	0.41843	0.609542	0.694426	0.654404	0.530085	0.667003	0.835557	0.835274	0.798874	0.820442
A0A369K3Y9	0.837544	0.782387	0.600213	0.482284	1.394	1.25068	1.43388	1.19663	4.81605	4.85107	4.29865	5.58216
A0A369JWY1	0.791412	0.78254	0.708869	0.639546	2.1956	1.75635	1.39383	1.82038	0.0638299	0.751032	0.142996	0.0028256
A0A369JHX7	0.663829	0.783145	0.765896	0.728221	0.745357	0.681873	0.413572	0.659627	0.49456	0.586507	0.520539	0.542356
A0A369JT41	0.738581	0.783592	0.983512	0.775493	5.20125	4.16015	4.15148	4.59059	0.849403	1.07523	0.461036	0.748656
A0A369KB35	0.801902	0.78481	0.510653	0.636041	2.37113	2.6823	3.07704	2.32706	0.197165	0.235984	0.276113	0.371779
A0A369JUY2	0.564437	0.785096	0.781144	0.711492	0.281729	0.112324	0.158185	0.0907571	0.100465	0.189674	0.102645	0.0937005
A0A369J2L3	0.628567	0.785414	0.339638	0.334779	1.46527	1.04835	1.47391	1.52798	0.0525356	0.18095	0.0833603	0.0064971
A0A369K7C8	1.02119	0.7866	0.867005	0.85163	0.969922	0.91941	1.06618	1.01043	0.0879281	0.112363	0.0809628	0.294386
A0A369K7U1	0.478935	0.78677	2.28359	2.01061	7.61406	6.87983	6.46845	5.45381	1.27366	1.20451	1.19069	0.918116
A0A369K5W0	0.739547	0.787139	0.556645	1.35686	0.91859	1.47321	1.14472	1.38316	0.351092	0.348679	0.223363	0.353247
A0A369K034	0.728306	0.789503	0.843268	0.687255	13.3207	9.29035	9.59056	11.0812	1.32964	1.05928	1.09563	1.23672
A0A369JL45	0.759206	0.792347	0.835087	0.721755	NA	NA	NA	NA	1.77371	1.45503	1.58871	1.80728
A0A369JQD1	0.94961	0.795021	0.809764	0.674264	7.75687	6.57273	7.30482	8.65048	0.377864	0.358563	0.282836	0.383885
A0A369JRV1	0.226937	0.796918	1.15473	0.269623	0.615124	0.383801	0.123848	0.297418	0.957538	0.574481	1.88031	1.95008
A0A369JFG2	0.618535	0.797997	0.670564	1.06356	0.810071	0.857211	0.732168	0.194545	0.397039	0.400774	0.665064	0.622953
A0A369JWF8	0.754826	0.80042	0.68407	0.750164	0.11471	0.128197	0.112064	0.103545	1.78708	1.79599	2.52064	1.81013
A0A369JGJ3	1.07226	0.803949	0.826537	1.05608	6.02184	5.13189	5.9715	5.66786	0.328717	0.377888	0.16919	0.796985
A0A369K4G6	0.777673	0.806678	1.63503	0.713027	1.98464	1.96349	1.72272	2.07837	0.845666	0.951527	1.12098	1.16791
A0A369JCP1	0.807521	0.807452	0.592826	0.13244	4.0489	3.82031	3.72306	3.71824	0.569671	0.732277	0.145216	0.591253
A0A369K236	0.572267	0.80844	0.589831	0.371368	0.645885	0.754191	0.705513	0.826848	0.263535	0.278835	0.399605	0.421396
A0A369JZ93	0.793151	0.809167	1.0374	0.741887	NA	NA	NA	NA	0.899529	1.28685	0.797583	0.902753
A0A369K9R8	0.783079	0.811266	0.981002	1.05563	12.8972	11.9305	11.499	12.638	2.43631	2.35233	1.85214	3.04613
A0A369J543	1.46177	0.814114	0.833834	1.10297	1.35052	1.36619	1.53159	1.07569	0.381784	0.364262	0.506365	0.377757
A0A369J7C0	0.942966	0.81762	0.915205	0.856525	0.657453	1.54384	1.53999	1.52955	0.943657	1.41121	1.40174	0.650432
A0A369JVP7	0.732161	0.817666	0.697286	0.578425	0.0196904	0.255126	0.225729	0.225395	0.923469	0.890758	1.0309	0.776998
A0A369KCN9	1.34822	0.820673	0.937285	1.20083	5.67469	5.41056	5.45539	4.70272	0.403772	0.402565	0.423077	0.491412
A0A369JD20	1.03125	0.822554	0.695471	1.27227	0.831101	0.922627	1.07804	0.80546	0.815569	1.02066	0.964834	0.790718
A0A369JI95	0.996175	0.824487	0.760395	0.706925	1.85368	1.80086	1.94643	1.40934	0.162195	0.140453	0.241857	0.0877157
A0A369JT28	1.21718	0.825529	1.28758	0.759595	1.15896	0.918893	0.895537	1.41105	0.972079	0.617499	0.902194	0.956428
A0A369K715	0.580962	0.825665	0.554719	0.815284	NA	NA	NA	NA	1.0861	0.994722	0.900863	0.955035
A0A369JPH5	0.97754	0.826412	0.773095	0.833215	1.21361	1.04827	1.12832	1.08026	0.570018	0.676936	0.114472	0.745657
A0A369J860	1.10616	0.831937	0.908714	0.437875	NA	NA	NA	NA	0.92793	0.977422	1.12295	0.914039
A0A369JP91	0.784297	0.83404	0.694011	0.732466	NA	NA	NA	NA	0.51678	0.423294	0.57776	0.75774
A0A369K0G2	0.837216	0.835269	1.11699	1.3013	0.498239	0.429882	0.532698	0.389908	2.63525	2.70726	2.84836	3.02043
A0A369JU96	0.811982	0.835685	0.898517	0.837234	NA	NA	NA	NA	0.117587	0.155301	0.0173094	0.117825
A0A369K6N7	0.80423	0.835783	0.906292	1.02265	NA	NA	NA	NA	1.43243	1.39142	1.653	1.54181
A0A369JR80	1.0255	0.836108	0.99236	0.846776	NA	NA	NA	NA	1.13188	0.988494	0.941831	0.994582
A0A369JVI4	1.33981	0.839002	1.02486	1.15263	NA	NA	NA	NA	2.49032	2.76946	2.38659	2.84622
A0A369K2M8	0.821649	0.842692	1.33737	1.06229	0.267379	0.213278	0.24754	0.272302	0.620911	0.660827	1.12994	0.668691
A0A369K7W0	0.451954	0.846332	0.696324	0.868093	0.224375	0.456071	0.235417	0.47352	1.77545	2.11322	1.5155	1.2555
A0A369JHE0	0.838527	0.847527	0.884457	0.892036	0.131946	0.140572	0.280169	0.0972445	0.585649	0.584774	0.570563	0.49279
A0A369JGZ7	0.289866	0.84871	0.844756	0.303612	3.86916	3.53652	3.95827	3.48649	14.7358	13.6729	16.0443	14.2852
A0A369K7Q0	0.665837	0.858525	0.864821	0.714384	3.03542	1.48478	1.93675	2.65151	0.0511671	0.0617422	0.0600994	0.228781
A0A369K0C0	0.94835	0.861378	0.874243	0.738235	15.7812	18.2173	16.8825	17.5667	0.261462	0.272889	0.242133	0.400022
A0A369JBN2	0.275877	0.862765	1.04702	0.807656	1.05095	1.00037	1.60912	1.34086	0.525025	0.576996	0.537895	0.390971
A0A369JVR5	0.807809	0.863716	1.07594	0.34962	0.155612	1.01082	0.224492	0.133992	0.115456	0.463507	0.427133	0.323772
A0A369JDW7	1.05388	0.867096	0.995784	0.715602	0.365954	0.42093	0.359348	0.438944	1.9232	2.07503	2.05473	2.01582
A0A369J5K1	0.872274	0.868358	0.889499	0.940522	0.591221	0.636606	0.749772	0.532102	1.06944	1.05492	1.05602	1.29419
A0A369J974	0.794526	0.872623	0.665448	0.0794313	0.210782	0.125668	0.285428	0.191318	0.968754	1.03068	0.955378	1.23231
A0A369JMG4	1.08195	0.87324	1.07675	1.3133	0.124142	0.170719	0.163252	0.123972	1.29657	1.21398	1.36907	1.1768
A0A369K2Y5	0.529681	0.876817	1.01903	0.945086	0.13624	0.192213	0.152061	0.164256	2.37222	2.93611	2.87935	3.15991
A0A369JEU8	0.700627	0.880562	0.57466	0.722053	NA	NA	NA	NA	0.275182	0.272699	0.287979	0.220587
A0A369J9J3	0.763311	0.880778	0.667695	0.781347	0.222548	0.187325	0.193924	0.196964	1.24564	1.61191	1.11626	1.30548
A0A369J0G4	0.894262	0.885673	0.94417	0.819096	0.182022	0.312112	0.306423	0.337881	0.257336	0.377298	0.267868	0.234421
A0A369JXP5	0.682472	0.886862	0.90841	0.631118	2.24778	2.75373	2.25254	2.1433	0.042396	0.125514	0.141577	0.0723722
A0A369JJI3	0.880796	0.889052	0.912704	0.855525	0.968941	1.17611	0.581734	1.05165	0.623402	0.762333	0.678628	0.599206
A0A369JBL7	0.833138	0.889509	0.878299	0.761966	NA	NA	NA	NA	0.792576	0.716295	0.409469	0.852637
A0A369K557	0.79459	0.891074	0.772695	0.641652	1.83742	1.42011	1.40863	1.01194	0.448166	0.0920664	0.671612	0.522819
A0A369K626	1.08864	0.892536	0.956932	0.589172	1.44544	1.29277	1.31331	0.682709	0.580206	0.585003	0.50544	0.710226
A0A369KAB3	1.10958	0.894091	0.27104	0.963052	0.70894	0.779462	0.611409	0.650327	1.01544	0.504529	1.19552	1.00022
A0A369JQ82	0.585579	0.894641	1.02394	0.662621	1.70495	1.64065	1.59794	1.71659	1.46163	1.24545	2.24758	2.02887
A0A369K7U5	0.956179	0.896816	0.886896	0.698315	NA	NA	NA	NA	1.99317	1.79932	3.30417	1.82474
A0A369JTW7	0.954435	0.898892	0.877726	0.910475	0.506913	0.350554	0.425387	0.399032	1.4189	1.12273	1.37315	0.946786
A0A369K2Z5	1.13962	0.899742	1.22413	1.15664	NA	NA	NA	NA	0.740253	0.907287	0.59786	0.710698
A0A369JMB5	0.822477	0.902155	1.30797	1.37824	33.4885	33.3409	36.7174	34.901	1.11383	1.3537	1.35883	0.899111
A0A369J9P5	0.971672	0.908902	0.903603	1.1313	NA	NA	NA	NA	0.732116	0.72641	0.761312	0.679287
A0A369JQM8	0.898497	0.909099	0.975286	0.724008	0.910218	0.542655	1.00262	1.03045	1.5545	1.62742	1.13394	1.26562
A0A369K0Q3	0.893304	0.912646	0.819634	0.834851	4.48678	4.43998	3.94531	4.15513	1.03756	1.02713	1.05481	1.40723
A0A369KE66	0.723023	0.915873	0.970184	0.57613	4.5363	3.62591	3.77356	4.34841	1.4661	1.44983	1.15103	1.2028
A0A369JV56	0.995133	0.916536	0.937003	0.845269	0.688278	0.573024	0.2998	0.339528	1.63345	1.9083	1.89714	1.98579
A0A369J2P6	0.821758	0.924973	1.43764	1.43507	0.255217	0.62341	0.690353	1.11416	0.31174	0.356173	0.343636	0.327317
A0A369JKC0	0.939068	0.928091	1.10167	0.655843	1.58003	1.7561	1.31745	1.66616	0.908623	0.743746	0.689369	0.838254
A0A369JQM7	0.983405	0.933368	1.29069	0.785215	NA	NA	NA	NA	1.80699	2.11836	1.6758	1.83458
A0A369JXN7	0.844369	0.935457	0.789408	2.11983	44.8269	47.9226	42.1379	43.4137	1.36896	0.675893	0.959627	1.46344
A0A369K696	0.77447	0.936453	0.615664	0.453014	0.609177	0.538171	0.0875922	0.656245	1.27871	1.37949	1.14824	0.960195
A0A369K882	0.94201	0.938969	0.829505	0.824755	0.161195	0.19271	0.130468	0.124605	0.315265	0.306611	0.35946	0.368254
A0A369JGY6	0.80584	0.940784	0.706441	0.77057	0.33836	0.358307	0.380233	0.411595	2.72093	2.48289	2.5585	2.45641
A0A369KDP6	0.762413	0.94097	0.49758	1.36103	1.62725	1.48695	1.60087	1.70434	0.453731	0.488629	0.337915	0.500507
A0A369J715	0.766211	0.942488	0.817448	0.899011	0.644936	0.553175	0.508643	0.148758	0.388266	0.780662	0.302249	0.777671
A0A369K6U8	0.898567	0.943277	0.731779	0.890529	1.84111	2.18192	1.88558	1.81175	0.547547	0.533845	0.592034	0.484395
A0A369J7U0	0.78714	0.946479	0.724835	0.760072	0.249734	0.337875	0.225331	0.188893	1.10312	1.14831	0.943318	1.26485
A0A369JT10	0.91737	0.948144	0.808776	0.860699	NA	NA	NA	NA	0.840458	0.748899	0.869826	0.724075
A0A369K611	1.09882	0.950976	1.08323	0.921808	NA	NA	NA	NA	0.384517	0.484693	0.405671	0.475322
A0A369K162	0.730938	0.954059	0.481556	0.614668	1.01406	1.05005	1.01344	0.957675	1.58022	1.67512	1.4384	1.70819
A0A369K7M4	1.17853	0.955928	0.763591	1.14708	NA	NA	NA	NA	1.76681	2.29821	2.14121	1.86718
A0A369JL65	0.964797	0.957238	0.940422	0.926617	0.911285	0.841469	0.978766	0.877134	0.383263	0.209021	0.362705	0.386498
A0A369JW94	0.935432	0.958001	0.873732	1.00255	0.271482	0.223139	0.268831	0.220161	0.718345	0.915734	0.581604	0.738689
A0A369J7J1	1.20371	0.958393	1.28162	1.46716	1.78979	1.525	1.62543	1.2113	0.429446	0.562959	0.423656	0.32882
A0A369K5C3	1.02825	0.958818	1.07792	1.0987	8.75728	8.45346	8.28032	7.88271	0.379471	0.432848	0.394344	0.416054
A0A369JTE9	0.973577	0.958822	0.79116	0.93231	NA	NA	NA	NA	3.43906	3.03334	3.41184	4.36849
A0A369JP34	1.17769	0.960154	1.59394	1.04361	7.72171	7.83593	10.5825	10.137	1.23327	1.08755	1.03123	0.657687
A0A369JCE1	0.816538	0.961789	0.818211	0.738371	0.594561	0.583797	0.466612	0.501949	0.163025	0.166733	0.289173	0.224007
A0A369J7L7	0.844633	0.963804	0.941637	1.18869	11.3294	11.9189	11.2504	12.1545	0.227307	0.307637	0.513006	0.557109
A0A369JMG5	0.938794	0.963965	0.87199	0.846159	NA	NA	NA	NA	2.28574	2.14763	2.07671	3.30187
A0A369JYB4	1.09494	0.966355	1.38738	1.14127	1.43619	1.95046	2.02576	1.46257	1.04974	0.658452	1.31277	1.36954
A0A369K0A7	1.03493	0.969113	1.27388	1.0617	0.36874	0.357936	0.329872	0.326768	1.38943	1.25081	2.01283	1.76138
A0A369J5V5	0.904971	0.97302	0.772026	0.225656	0.47668	0.355857	0.230154	0.390238	0.719096	0.338069	1.04051	0.624038
A0A369JDH3	0.951628	0.973071	0.871661	0.912993	NA	NA	NA	NA	0.980028	0.890221	0.932985	1.07251
A0A369K115	0.974406	0.975037	0.301512	0.167501	1.81588	1.60353	1.40298	1.22543	0.689939	0.647495	0.612098	0.697299
A0A369J6C6	0.876648	0.977229	0.887717	0.976005	2.0923	1.98409	2.12007	1.65892	0.441702	0.519152	0.433512	0.332345
A0A369K7Q5	0.649524	0.978356	0.445108	0.909606	0.13947	0.160744	0.137262	0.118876	1.19823	1.16457	1.06417	1.09082
A0A369JU93	1.20442	0.978568	0.984665	0.860263	NA	NA	NA	NA	0.56102	0.66583	0.545556	0.585863
A0A369JI60	0.320962	0.980739	0.318212	0.301899	NA	NA	NA	NA	1.30599	1.10742	0.992263	0.66165
A0A369JW51	0.870251	0.981569	0.554417	0.783027	0.446117	0.751067	0.71478	0.862731	NA	NA	NA	NA
A0A369JA46	1.12113	0.986997	1.10279	0.952633	1.29707	1.49404	1.17089	1.11959	3.35692	3.73832	2.98719	3.23968
A0A369JGN0	0.805276	0.988221	0.934921	0.948462	0.0912439	0.099499	0.121553	0.101189	5.02369	5.02533	4.93965	3.69744
A0A369K448	1.12916	0.989627	1.10122	0.793222	0.443954	0.541007	0.592443	0.523774	0.728438	0.72297	0.910861	0.615137
A0A369JAR4	0.916282	0.99638	1.03306	0.903074	1.15891	1.09398	1.32291	0.609802	1.72335	2.16569	1.53515	1.71023
A0A369JKE1	0.718543	0.9987	1.00828	1.03213	9.00363	8.11093	8.98652	8.42447	2.98741	1.99949	2.43288	2.41627
A0A369J6Q3	0.765983	0.998768	1.30188	1.11514	0.178796	0.0474721	0.23703	0.222428	1.47333	1.40534	1.05478	1.27156
A0A369K6N2	0.9891	1.00123	0.399187	1.05009	0.148057	0.289024	0.236428	0.201277	0.878775	0.927239	0.699004	0.380174
A0A369KAK2	1.27067	1.00235	1.13129	0.999594	1.785	2.00406	1.84783	2.23815	1.00821	0.880186	0.963758	0.729991
A0A369JHL0	0.936834	1.00651	1.49806	1.17415	0.840447	1.03199	0.945997	0.803743	1.10481	1.18022	0.966361	1.27006
A0A369JI06	0.998436	1.00903	1.13105	1.48604	1.21757	2.1275	1.73773	2.47165	0.837804	0.267579	0.151733	0.0586626
A0A369JR41	0.797636	1.01018	1.1274	1.0941	NA	NA	NA	NA	0.981865	1.13215	1.09065	1.06767
A0A369JL94	1.32003	1.01115	0.998095	1.06302	0.39497	0.808366	0.425324	0.70936	0.834957	0.720625	0.51603	0.649299
A0A369JRG0	0.91401	1.0157	0.912547	0.819089	NA	NA	NA	NA	1.04621	1.06558	0.874616	0.968365
A0A369JDW0	1.02384	1.02063	0.829648	0.802726	3.22228	2.87729	3.71125	2.90391	0.925569	0.93903	0.642515	0.859993
A0A369J5F3	1.08743	1.03173	1.67748	0.711939	2.30142	2.21672	2.66333	2.50688	2.49187	1.97347	1.73436	1.67109
A0A369J5R9	1.09635	1.03299	1.04524	0.980524	NA	NA	NA	NA	NA	NA	NA	NA
A0A369K9L8	0.705651	1.03362	1.61997	1.92837	12.7734	13.5218	13.6398	11.2	1.53179	0.891631	2.12725	2.30158
A0A369JKD5	0.872109	1.03438	0.987766	0.427326	0.105939	0.15573	0.0614816	0.0832246	1.95607	2.67445	2.62959	2.74427
A0A369JRF4	1.1549	1.03547	1.57629	1.05317	0.198819	0.214709	0.333874	0.209406	1.26048	1.0839	1.07956	1.05715
A0A369JQX6	1.1828	1.03553	1.01234	0.791493	2.54497	2.31655	2.39918	1.60953	0.663676	0.56939	0.663917	0.688227
A0A369JG10	0.947025	1.03677	0.910824	0.862179	6.71922	8.31078	7.58426	9.90804	1.20111	0.890397	1.52163	0.681795
A0A369JT04	1.16347	1.03789	0.75592	1.03553	2.57896	1.94265	2.32089	2.44942	1.32361	1.48559	1.30931	1.13968
A0A369JKP6	1.03169	1.03852	0.95561	0.960342	NA	NA	NA	NA	0.617815	1.00463	0.758463	0.981948
A0A369JQA8	1.09685	1.042	0.896335	0.950197	3.17464	2.90563	2.23681	2.35467	0.932411	1.01707	1.03884	0.978659
A0A369K3T2	0.865312	1.05076	0.711624	0.948396	2.77434	2.22912	2.49343	2.40694	0.504301	0.744996	0.640822	1.03291
A0A369JN02	0.854601	1.05434	0.588171	0.604321	4.24856	4.32019	4.2145	5.20953	0.582121	0.597837	0.540282	0.530774
A0A369KGG8	1.15041	1.05444	1.04293	1.12216	1.22192	1.67247	0.574787	0.661812	1.97218	1.89146	2.31811	2.08703
A0A369JM05	1.24716	1.05652	1.28902	1.04133	7.06658	6.84732	7.01405	9.23005	1.97402	1.48815	1.41855	1.80722
A0A369KCE5	0.926508	1.06072	0.812064	0.924309	NA	NA	NA	NA	2.22641	2.81002	3.27821	2.03953
A0A369JRW7	0.746182	1.06651	1.21112	1.42574	8.28022	6.91049	8.28042	7.774	2.25981	2.47145	2.27537	2.37652
A0A369JFF8	1.23325	1.07125	1.4367	1.34889	7.75616	7.41988	7.40346	7.39373	5.36559	5.42102	4.59496	5.4868
A0A369JXL8	0.601192	1.0741	0.509224	0.546399	1.67302	1.41122	1.87817	1.59743	2.00283	2.1627	1.62091	1.70208
A0A369J6Z6	1.06054	1.07412	1.01054	0.910306	0.897347	0.339763	0.36426	1.15037	0.958345	0.419616	0.587744	0.628176
A0A369JR50	0.964899	1.07416	0.626385	0.975735	1.69938	2.07413	1.9653	2.04723	0.470164	0.285399	0.577911	0.602761
A0A369JNG1	1.36798	1.07516	1.47029	1.60085	1.69811	2.71653	1.13869	1.81408	2.2852	2.06078	2.0855	1.8976
A0A369JY90	1.21535	1.08379	0.900519	0.992686	0.485619	0.525272	0.57421	0.554823	1.03531	0.704267	0.436167	0.795844
A0A369JFL7	1.1256	1.08935	1.22723	1.1406	3.01715	3.34062	3.17395	2.23281	0.208598	0.260207	0.26811	0.243852
A0A369KCU1	2.00675	1.10247	1.33876	1.08844	4.67723	4.67997	4.61302	4.29192	1.61074	3.19251	1.62978	1.5286
A0A369K3W8	1.3336	1.10296	1.18674	1.03676	1.71	1.2966	1.08623	1.7365	NA	NA	NA	NA
A0A369K1K9	1.13446	1.10483	1.0135	0.861161	0.385966	0.284701	0.410533	0.421813	1.02948	0.934393	1.0519	1.34875
A0A369J6R4	0.624623	1.10566	1.0394	0.826673	0.0740391	0.113324	0.10405	0.108158	2.16533	1.74069	0.792406	1.47623
A0A369J705	1.23293	1.1057	0.919562	0.83581	0.683316	0.548391	0.503766	0.672663	0.231743	0.731661	0.144783	0.630102
A0A369JXS2	0.89412	1.10627	1.66412	1.17267	NA	NA	NA	NA	1.33641	1.43379	1.69827	1.61796
A0A369K7N2	0.643004	1.10767	0.595844	0.527072	0.564436	0.542264	0.544973	0.680222	0.5162	0.14253	0.510459	0.138211
A0A369JP20	1.18028	1.10779	1.62661	1.57827	6.78755	5.60515	6.16562	5.91626	0.421149	0.395287	0.35036	0.464991
A0A369KHW8	0.987786	1.12623	0.837357	0.939725	1.46347	1.27423	0.914215	1.45839	NA	NA	NA	NA
A0A369JZW1	1.15722	1.12716	0.193772	1.14385	0.0855679	0.109154	0.151763	0.117725	2.25402	2.56836	2.32345	2.18784
A0A369K5H2	1.38424	1.12832	1.12174	1.95737	1.08458	1.52979	1.7213	1.09786	NA	NA	NA	NA
A0A369JCZ6	0.848049	1.12858	2.1095	2.15981	3.52727	3.0838	3.47189	3.27721	0.206696	0.180346	1.23007	0.883219
A0A369K4T7	1.08173	1.12981	0.359294	0.372719	0.0695386	0.0750196	0.0929534	0.0869719	0.475092	0.447581	0.643276	0.446016
A0A369JMW2	1.15299	1.13017	1.12852	1.11936	NA	NA	NA	NA	3.09342	2.96566	2.7282	2.49688
A0A369JC22	1.23773	1.13032	1.58826	1.82911	0.70894	0.582171	1.23027	1.4706	0.718767	1.41109	0.905081	1.09337
A0A369JNY8	0.656321	1.13164	1.24572	0.352339	NA	NA	NA	NA	2.05382	2.27986	2.11993	2.17708
A0A369J0F7	1.38584	1.13703	0.529551	1.37869	4.00265	4.72316	8.78374	2.66736	1.11353	1.39677	1.12403	0.875765
A0A369JYC5	0.955799	1.14067	0.775031	1.02206	0.570722	0.508683	0.554426	0.515836	1.05241	1.14063	1.08155	1.30493
A0A369JWH5	1.25913	1.14129	1.01056	1.14924	0.0945966	0.100871	0.108875	0.0710916	2.21294	2.51257	2.36288	2.23523
A0A369KE72	1.63003	1.14659	1.33919	1.40976	0.402974	0.405249	0.419011	0.525543	0.772535	0.556941	0.947088	1.13961
A0A369J9B6	0.89755	1.14964	1.05895	0.615501	1.15129	0.951316	0.848027	1.17835	1.22046	1.30796	0.915999	0.647748
A0A369JID8	1.28475	1.14972	1.27284	1.30723	NA	NA	NA	NA	2.05224	1.52979	1.82543	1.43718
A0A369JXJ2	1.14723	1.15161	1.1005	1.6587	4.09627	5.24514	4.81969	4.60587	0.342423	0.354745	0.397712	0.433911
A0A369JLD3	1.17888	1.15324	1.05975	0.962283	2.47163	2.98658	2.73834	2.6927	3.47117	2.77188	3.58879	3.30483
A0A369KAG6	0.885289	1.15884	0.933484	1.09782	0.501667	0.554238	0.507034	0.65235	1.68195	2.03072	1.85878	1.78623
A0A369JIC0	0.877155	1.16196	0.941546	1.06847	NA	NA	NA	NA	1.54646	1.56923	1.61226	1.86256
A0A369K725	1.43238	1.16267	1.64907	1.56605	2.13989	1.49269	2.23578	1.5455	0.18525	0.208135	0.135956	0.2613
A0A369J9U0	1.16461	1.16576	1.05845	1.30244	0.209991	0.244867	0.248769	0.200543	1.26001	1.23129	1.44804	1.58112
A0A369JUH3	0.995586	1.16608	0.928265	1.66605	24.8863	22.6985	25.3229	21.7239	1.36035	1.22158	1.23497	1.00171
A0A369JFR5	1.49109	1.17345	1.17019	1.10905	0.960307	0.825628	0.898834	0.361945	0.525403	0.57683	0.490832	0.546776
A0A369JDE1	1.2284	1.17388	1.30522	1.18351	0.296213	0.118849	0.113377	0.104986	1.20413	2.21215	2.15303	2.41488
A0A369JWP4	1.21403	1.1739	0.85752	1.12078	8.38848	8.84721	7.55154	9.08892	1.69122	1.86496	1.75662	1.69167
A0A369JJ15	1.27969	1.17489	0.99428	1.20731	NA	NA	NA	NA	1.00244	1.18853	1.18826	1.33998
A0A369K9F4	1.25603	1.17725	1.10474	1.3915	NA	NA	NA	NA	0.913496	1.39357	1.23762	1.04398
A0A369JF34	0.963006	1.17794	1.0313	1.16941	0.0951342	0.105868	0.0894166	0.106641	0.448402	1.43054	1.08119	1.34882
A0A369K290	3.47456	1.17834	2.71232	2.45259	0.970177	0.927491	0.837066	0.781716	3.74606	3.98287	3.48343	3.55027
A0A369JPL8	1.01737	1.18297	1.05072	0.961296	0.189678	0.285152	0.178904	0.203944	1.23875	1.55723	1.68375	1.37392
A0A369K9K8	0.626887	1.18369	1.46382	0.920731	1.24675	1.80402	1.70224	1.30234	0.984563	0.916067	0.605928	1.19739
A0A369JFN4	0.691988	1.18454	1.25401	1.03616	0.146837	0.178982	0.0780747	0.0722782	1.11855	1.11645	1.15875	1.58933
A0A369JQ90	1.21737	1.18537	1.77997	1.58039	8.18125	7.566	8.00683	5.81581	3.18963	3.4347	2.81213	2.91043
A0A369JDU0	0.0316669	1.19149	0.906152	0.123937	1.5558	1.08764	1.04239	1.72184	1.4501	1.65326	1.5084	1.94598
A0A369K982	2.13441	1.19265	1.84325	2.14383	14.1022	13.8127	12.1696	13.9749	4.20684	3.57069	3.66111	4.08521
A0A369K8Y7	1.00044	1.19842	1.08883	1.06519	0.511272	0.587407	0.457758	0.478447	0.134124	0.138983	0.137316	0.182591
A0A369J9B5	0.88363	1.20501	1.0793	0.71672	0.614835	0.661122	0.798165	0.843337	0.177346	0.142556	0.366219	0.106521
A0A369K4W4	1.01571	1.2053	0.824138	0.792381	1.54427	1.35113	1.61972	1.74439	0.105768	0.0855794	0.110646	0.112523
A0A369J7G7	1.21183	1.20542	1.90203	0.970951	3.92958	4.38158	4.2124	3.70705	0.39293	0.342583	0.277893	0.33123
A0A369J411	1.10514	1.21004	0.986413	1.68877	1.47352	1.03425	1.40782	1.15742	0.851732	0.825101	0.471884	1.01766
A0A369J4D6	1.02104	1.21426	0.859805	0.601172	1.21379	1.07499	1.04237	0.919435	0.88884	0.962597	0.987318	0.81687
A0A369J4I9	3.67809	1.21676	0.87326	3.69871	0.458161	0.71881	0.241437	0.343508	3.51109	0.392323	3.26782	3.31447
A0A369K2B6	1.6301	1.21914	1.02477	1.91999	NA	NA	NA	NA	1.11977	1.13521	1.56313	1.43023
A0A369K511	0.84024	1.21948	0.812739	1.00041	0.796198	0.976601	0.831568	0.558069	0.946621	0.659312	0.440626	0.829373
A0A369KF75	1.18122	1.2198	1.35934	0.986187	1.44768	1.40811	1.46035	1.5126	1.54582	1.67042	1.61414	1.6269
A0A369JLT0	0.995896	1.2272	0.975372	1.23171	0.431914	0.395323	0.3948	0.436583	2.19161	1.9297	2.59038	2.56499
A0A369JVF6	0.93186	1.23386	1.16654	1.10611	3.60962	2.62448	3.05329	3.14128	1.81862	2.10602	2.12962	2.48908
A0A369K9T0	4.95431	1.23822	4.52898	2.6405	2.77093	2.49108	2.30866	2.56006	18.7872	18.1146	19.004	19.9524
A0A369IYB6	1.15724	1.24501	1.34032	1.49029	2.31843	2.28421	1.92299	2.11695	1.06955	1.0257	1.2364	0.966815
A0A369J3A9	0.757648	1.2513	0.656968	0.586265	0.170037	0.263053	0.199468	0.114876	0.582302	0.823069	0.966039	0.70453
A0A369JSB6	1.61525	1.25227	1.42541	1.52555	0.533046	0.512155	0.278355	0.260149	2.4765	3.17536	2.61724	2.04612
A0A369J2T0	1.19802	1.25274	0.767432	0.98122	0.311708	0.328793	0.235838	0.332025	0.711041	0.623752	0.767637	0.812341
A0A369JM89	1.53673	1.2576	1.34323	1.15417	0.163676	0.196094	0.283629	0.113101	0.678221	0.572091	0.579567	0.0697323
A0A369IZW7	1.80843	1.25957	6.41941	1.83722	18.6951	17.3702	18.4515	16.5512	1.08688	1.18877	1.4893	0.913195
A0A369JKN5	1.5736	1.26299	2.38731	1.77554	7.68439	7.24647	7.81998	7.6386	1.97441	1.97838	2.34163	2.26368
A0A369K754	0.854394	1.26708	0.657253	0.994711	1.79725	2.29974	1.75442	2.5564	1.39825	1.25671	0.80026	1.49443
A0A369K2L9	0.678529	1.27004	0.763512	0.626346	NA	NA	NA	NA	3.32803	3.34261	3.42858	2.68541
A0A369JJJ2	1.01395	1.27477	0.827372	1.14945	NA	NA	NA	NA	1.35603	1.73119	1.27664	1.76652
A0A369K4X3	1.40763	1.27978	1.28713	1.28526	0.661494	0.591655	0.561614	0.546968	2.19071	2.37879	2.25111	2.30959
A0A369JPI3	2.20157	1.28095	1.89575	1.25518	33.1773	31.9851	33.4186	34.1044	2.60589	2.54585	2.92817	4.07161
A0A369KFJ0	1.19335	1.28599	1.1201	1.20378	0.230144	0.257812	0.268589	0.442465	2.21697	2.62018	2.11292	2.25496
A0A369JGU6	1.35953	1.28909	1.34308	1.28849	NA	NA	NA	NA	1.10527	1.24558	0.814426	0.990582
A0A369JR60	1.44749	1.29186	0.840217	1.05169	NA	NA	NA	NA	0.2798	0.322326	0.219965	0.365345
A0A369JUF3	1.64661	1.29318	1.3189	1.95045	NA	NA	NA	NA	1.33387	1.21167	1.29574	1.291
A0A369JER3	1.60262	1.29435	1.16113	1.29703	0.479522	0.369222	0.403501	0.279638	1.84805	2.00401	1.52926	1.38635
A0A369J086	1.30053	1.29815	0.386364	1.36323	NA	NA	NA	NA	0.60861	0.613424	1.38962	0.451046
A0A369K885	1.11541	1.3002	1.88854	1.51956	5.69139	7.4844	8.28164	10.4954	0.289497	0.273801	0.275192	0.31297
A0A369JCQ2	1.27045	1.30499	1.33497	1.33939	NA	NA	NA	NA	1.21623	1.55993	1.15519	1.02036
A0A369JTZ5	1.12966	1.30539	1.02104	1.16283	0.134688	0.0923686	0.14589	0.207655	1.80693	2.09791	2.22374	2.43805
A0A369JV45	0.963379	1.30574	0.397889	0.882748	NA	NA	NA	NA	2.34836	2.55604	2.5437	2.8405
A0A369JT49	1.13797	1.3063	2.00237	1.00345	1.14204	0.843686	1.51128	1.46778	1.90005	1.93117	1.907	1.78244
A0A369K319	1.2983	1.30659	1.25187	1.47242	20.2819	21.3615	17.7799	23.8199	0.560493	0.696742	0.636574	0.614565
A0A369JK56	1.13607	1.31329	1.42761	1.26659	0.197803	0.165287	0.173305	0.125485	1.17883	0.606915	0.242018	0.946782
A0A369K3J5	1.58027	1.31348	1.13698	1.26409	1.10188	1.34749	1.3172	1.42126	1.07294	1.03369	1.09459	1.04067
A0A369K648	1.09096	1.31357	0.702133	1.21534	0.476292	0.54294	0.452791	0.195466	1.6402	1.47742	0.93014	1.30877
A0A369K3M4	1.68027	1.31504	1.26054	1.10455	0.624262	0.632633	0.817233	0.813369	1.21248	1.30779	1.03747	1.35797
A0A369J479	1.14578	1.31593	2.11064	0.968511	0.21775	0.654864	0.209585	0.741669	1.46946	1.28608	1.49248	1.37187
A0A369K972	1.40389	1.3187	1.3517	1.12032	NA	NA	NA	NA	1.12801	1.24646	1.26028	1.48104
A0A369JB54	0.997021	1.32388	1.15651	0.980787	NA	NA	NA	NA	1.13465	1.26104	1.26921	1.00879
A0A369K0W0	1.44813	1.32456	1.26566	1.33876	NA	NA	NA	NA	3.54693	3.20559	3.1999	2.94901
A0A369IYH2	1.42488	1.32531	1.45253	1.08192	2.74006	2.73462	2.71384	2.60577	0.510034	0.388122	0.0323077	0.755056
A0A369JSJ9	0.927423	1.32636	1.03885	0.75388	5.31116	4.84	5.92055	5.76455	0.271982	0.275828	0.630405	0.799397
A0A369JNW4	1.27659	1.34571	1.03534	0.829285	0.776951	0.866058	1.17272	1.58929	0.966758	0.849543	0.734823	0.17549
A0A369KAN0	1.3668	1.34652	0.959554	0.864398	0.254443	0.255406	0.206137	0.268484	1.97896	2.03472	1.53578	1.04993
A0A369JM31	1.23578	1.34988	1.47026	0.796791	15.5613	15.5525	16.3673	15.57	0.589674	1.69928	0.43504	0.477996
A0A369JCZ2	1.20795	1.35367	1.36826	1.1298	NA	NA	NA	NA	1.46291	1.51856	1.55665	1.67362
A0A369JPU7	1.11326	1.3569	1.24394	1.08964	1.81113	2.37403	2.43928	2.09175	0.683524	1.11419	0.836796	0.729955
A0A369JJV8	1.31793	1.36297	1.03677	1.12694	0.880489	0.679558	0.447449	0.111711	0.723408	0.919842	0.768737	0.128013
A0A369JT87	1.26713	1.3698	0.970847	1.05005	0.263967	0.346441	0.275161	0.13664	1.74778	1.65257	1.83459	2.29588
A0A369JRJ7	1.19156	1.37336	1.58092	1.32707	NA	NA	NA	NA	0.168774	0.404568	0.268234	0.320639
A0A369J312	0.961332	1.37602	1.21905	1.18511	4.60373	5.39399	4.57704	4.73388	1.76979	1.88243	1.49491	2.28873
A0A369JP02	1.81664	1.37654	1.36807	1.52489	2.51523	2.77599	2.55191	2.87479	0.599321	1.32125	0.753222	1.20089
A0A369JB20	1.31896	1.37981	1.51162	1.40534	0.169899	0.193613	0.129681	0.197592	1.54105	1.86823	1.37038	1.33977
A0A369JKQ9	1.13845	1.39133	1.28789	1.44894	3.6851	3.71848	3.42586	3.91906	1.26752	1.62617	2.13774	2.16951
A0A369JGP2	1.78823	1.39235	1.47464	1.45641	2.44615	2.19804	2.49025	2.50086	1.66005	1.6285	1.92854	1.65067
A0A369K654	1.6052	1.39298	1.25698	1.14781	NA	NA	NA	NA	1.20301	1.25395	0.90002	1.0966
A0A369JFV3	1.34429	1.39337	1.18291	1.4684	0.245282	0.471365	0.445165	0.440899	2.02011	2.1368	1.54999	1.51493
A0A369JFN9	1.32328	1.39581	1.20103	1.18528	NA	NA	NA	NA	0.94209	0.852715	0.772387	0.474263
A0A369JDS5	1.21745	1.40167	0.770949	1.21847	0.363842	0.324747	0.45665	0.502259	1.09647	1.10952	1.13523	1.47985
A0A369JDC9	1.57095	1.40503	1.96966	1.70283	2.4131	3.0675	1.84438	3.83781	2.33982	1.67362	1.87702	2.50714
A0A369JV41	1.34848	1.40953	1.49066	1.50582	8.15098	9.10216	7.4627	8.32303	0.966965	0.744329	0.824759	0.745666
A0A369K4B6	1.20683	1.41063	0.734605	1.46931	4.24581	3.55904	4.86284	3.83466	3.77422	3.56463	3.06314	4.70343
A0A369JTJ6	1.28971	1.4128	1.26698	1.23418	NA	NA	NA	NA	2.05528	1.27986	1.90536	1.06203
A0A369J2A5	1.36206	1.41419	1.52786	1.33482	0.312937	0.294598	0.574922	0.476739	1.52821	1.76003	1.45372	2.36698
A0A369K377	1.60512	1.41465	1.86494	2.04412	0.250761	0.650382	0.544298	0.22069	1.72683	1.68616	1.90554	1.90859
A0A369J209	1.52486	1.42016	1.8248	1.99762	26.1342	26.0669	25.1951	26.9339	0.375193	0.782864	0.781842	0.926605
A0A369K4M7	2.27742	1.43094	1.76326	1.05511	11.6994	11.2376	9.30741	12.372	1.58907	0.7965	0.757806	1.14356
A0A369JVD8	1.2806	1.43235	0.952262	1.3068	0.0266763	0.0281053	0.308831	0.0160558	0.538411	0.795806	0.688311	0.64874
A0A369K833	1.35467	1.43513	0.472377	1.41898	1.62265	1.53439	1.48483	1.56027	0.849261	1.14304	1.02942	0.719622
A0A369K0Z5	1.64491	1.43547	1.08177	1.02681	4.03654	4.09546	3.61339	3.66061	1.16902	1.90631	2.28297	2.1865
A0A369JW66	0.83686	1.44043	0.798915	0.744141	0.284452	0.22514	0.194943	0.129441	1.49284	1.71569	1.13413	1.2637
A0A369JB79	1.36489	1.44211	1.60869	1.89228	0.567593	1.14157	1.22951	0.526214	3.00718	3.183	2.89092	3.10203
A0A369K859	1.01016	1.44696	1.07429	1.05725	1.18809	1.3161	1.16274	1.52631	0.538269	0.523379	0.376902	0.457164
A0A369JD67	1.03875	1.44697	1.0627	1.14973	NA	NA	NA	NA	1.04053	0.960219	0.964818	0.875441
A0A369JUZ0	1.22753	1.44775	1.5343	1.60093	1.95775	1.60566	1.28426	2.3312	1.47295	1.4331	1.81287	1.77215
A0A369JL69	1.44201	1.45719	1.31681	1.39071	NA	NA	NA	NA	2.86628	3.62382	2.55796	2.6371
A0A369JLG6	1.23075	1.45752	1.1414	1.79127	0.658615	0.733434	1.56211	0.656794	0.927888	1.31806	1.0895	1.04524
A0A369J8L5	1.66341	1.45957	1.80834	1.72325	NA	NA	NA	NA	2.38066	1.90405	2.2281	2.06897
A0A369JT34	1.27272	1.46103	1.39028	1.3368	0.382041	0.42368	0.479729	0.575144	1.24973	1.86029	1.90776	1.97393
A0A369J1Y0	1.60668	1.46153	1.52652	1.72607	1.09198	1.1958	1.79544	1.06485	1.06098	1.28249	1.31547	0.640678
A0A369K0M5	1.25083	1.46472	1.51962	1.51042	0.70744	0.772517	0.296615	0.718474	1.46222	1.48029	1.43654	1.16202
A0A369JNP8	1.34952	1.46752	1.21262	1.4618	0.463463	0.954421	0.571659	0.82276	2.27865	2.4822	2.46088	2.06598
A0A369J4M5	1.2575	1.47007	1.4137	1.41716	NA	NA	NA	NA	1.20507	1.16126	1.13554	1.08608
A0A369JR19	1.85156	1.47471	1.9192	1.43964	0.261551	0.195367	0.353641	0.813538	2.46209	3.00276	2.51642	2.78983
A0A369K3K2	1.14642	1.47551	1.6018	2.00587	1.62182	1.6358	2.04216	2.08599	1.08786	0.947923	1.38398	2.09922
A0A369JYB1	1.26611	1.478	1.30817	1.40354	1.64445	1.45734	1.56214	1.27887	1.78511	1.91172	1.66586	1.99717
A0A369JY05	1.3247	1.47819	1.51082	1.97902	10.963	12.4543	10.7469	10.8255	1.77033	1.90452	1.70134	2.16345
A0A369K8W6	1.27892	1.47894	1.28732	1.16886	1.63422	1.21588	0.857124	1.24708	0.834834	0.539705	0.85167	0.625487
A0A369K9H4	1.53756	1.4808	1.29351	2.09116	10.5025	10.2373	10.1012	10.9781	0.890907	0.944313	0.649568	1.2086
A0A369K071	1.79633	1.48247	1.46151	2.09432	4.36638	3.95696	4.35312	4.30286	1.35249	1.45269	1.24012	1.47651
A0A369K488	0.80474	1.48376	1.40196	1.4712	12.9776	11.8584	12.5353	12.5497	3.04244	2.70229	2.36589	2.20688
A0A369JBI8	1.58633	1.4874	1.21738	2.02327	0.628279	0.687409	0.260629	0.286986	1.6704	1.50665	1.36563	1.65051
A0A369JEG0	1.21508	1.48831	1.20586	1.16083	1.14409	1.16924	0.899225	1.41428	1.3457	1.40971	1.57759	1.2208
A0A369K9A5	1.3968	1.49062	1.22994	1.75778	0.90707	0.885191	0.957301	0.788946	3.95588	3.90967	3.92873	4.27719
A0A369JHN1	1.22595	1.4966	1.0535	1.3328	0.182085	0.095374	0.0879538	0.0814907	2.9738	3.15728	2.39491	2.85164
A0A369JSV0	1.76144	1.50413	1.97006	1.83684	1.76815	1.79349	1.9448	1.77265	2.45479	2.71935	2.48971	1.88913
A0A369K225	1.41867	1.50726	1.33092	1.32186	0.415752	0.358936	0.378544	0.337627	1.51977	1.52907	1.14564	0.905863
A0A369J993	1.20285	1.5124	1.16492	1.32289	0.277746	0.337394	0.323588	0.392301	3.29814	3.7813	3.14856	3.84931
A0A369IZ25	1.2114	1.51987	1.26583	1.45208	1.20371	1.0983	1.28546	1.08722	2.18848	2.30683	1.81377	1.80325
A0A369K4S7	1.57434	1.52275	1.60241	1.65821	NA	NA	NA	NA	4.56263	4.4896	5.29516	4.84177
A0A369K7E1	1.49816	1.5363	0.862335	1.32627	24.0981	24.3186	23.3577	21.7948	1.07206	1.16094	0.945881	1.22476
A0A369JMA3	0.196361	1.53947	1.21008	1.46836	1.07313	0.88382	1.92655	2.25147	2.00018	2.18027	1.98241	2.33619
A0A369JT54	1.546	1.53976	1.44645	1.50452	NA	NA	NA	NA	1.92582	1.8316	1.57882	1.66119
A0A369K5Q4	1.51702	1.54176	1.66832	1.08654	3.23355	2.47884	2.24999	2.92676	0.599114	0.281208	0.828383	1.14636
A0A369JL56	1.34741	1.54219	1.20154	1.23075	1.33257	1.18067	1.51259	1.09342	0.486457	0.456462	0.457871	0.465433
A0A369JPG3	1.69105	1.5447	1.14621	1.05506	NA	NA	NA	NA	1.1573	1.85455	1.86908	1.68683
A0A369J8A0	1.77902	1.5452	1.5708	1.6329	6.53899	6.23266	6.6062	6.23476	0.594882	0.684844	0.698579	0.625463
A0A369JVF9	2.97656	1.54806	3.50747	2.48023	0.364224	0.177249	0.588556	0.0543568	1.86665	2.02239	1.71296	1.93436
A0A369K7W7	1.94804	1.55099	1.44699	1.96482	NA	NA	NA	NA	0.345226	0.381529	0.420469	0.308676
A0A369J9G0	1.54537	1.55263	1.44448	1.83764	11.7167	10.8966	11.338	10.6775	1.10231	1.1382	1.04101	0.794644
A0A369K2V7	2.16105	1.55276	1.53312	2.3098	0.0766611	0.595551	0.977685	0.0827557	2.18206	2.14665	2.42738	2.01976
A0A369JXM1	1.42711	1.55391	0.977523	1.20159	2.43285	1.99236	1.88829	2.46986	0.155794	0.163166	4.78033	0.147326
A0A369JKB6	1.58931	1.55543	1.53906	1.04775	0.636905	0.770786	0.701043	1.62397	5.72172	6.44504	5.94577	5.42248
A0A369K1I4	1.78501	1.56408	1.74851	1.38337	4.66718	4.61081	5.12066	4.58398	0.242582	0.239724	0.282259	0.305657
A0A369JRX8	1.27531	1.56742	1.37354	1.53284	3.27254	3.2448	3.21077	3.37549	1.28191	1.41835	1	1.43447
A0A369J6L9	1.53245	1.56768	1.57964	1.61769	0.350261	0.470422	0.485381	0.543232	3.40579	3.88011	2.70678	3.45515
A0A369JBK4	1.86775	1.57021	1.72594	0.901893	1.36398	1.41514	0.779894	1.09522	2.33682	1.89715	2.13854	1.3835
A0A369JLG1	1.1006	1.57102	1.013	1.55289	11.9058	15.598	16.6781	14.1126	1.24364	1.99565	1.6604	1.18886
A0A369JWM8	1.38882	1.58392	2.13993	2.39332	4.46388	3.26278	4.12432	3.9791	3.22913	2.75502	3.09892	3.68024
A0A369JLQ7	1.53172	1.5909	0.97438	1.1777	0.691209	1.04786	0.872412	0.684867	6.53533	8.27485	8.24774	7.16717
A0A369K3T7	1.67728	1.59467	2.02001	0.832551	1.60692	0.953069	1.21957	0.704427	5.25124	4.78696	4.86536	5.12142
A0A369JSV4	1.55047	1.59717	1.30364	1.27123	NA	NA	NA	NA	2.73142	2.87398	3.31466	2.73341
A0A369J285	1.09128	1.60258	1.54106	1.06033	NA	NA	NA	NA	2.36331	1.95812	2.51245	2.23026
A0A369J223	1.2698	1.60704	1.43155	1.48716	0.990669	1.00034	0.952628	0.879085	3.3115	3.83233	4.31257	3.70775
A0A369J6T7	1.75388	1.61026	1.1598	1.55611	3.40142	3.44227	3.08135	3.38719	0.40381	0.434659	0.0989552	0.702153
A0A369JJN2	1.48846	1.61306	2.12242	2.35127	2.27742	2.29	2.6257	2.40674	1.27596	1.38917	1.09219	1.02453
A0A369J8C7	1.76556	1.61519	1.70156	1.90264	0.393882	0.4466	0.363517	0.44754	2.9567	2.66134	2.28936	2.85554
A0A369JNS7	1.11697	1.62021	1.64456	1.44528	1.15802	1.28137	1.25052	1.31967	1.39958	1.4662	2.21412	1.89256
A0A369J097	1.47225	1.62049	1.39407	1.84	7.38859	7.14056	7.06001	7.28799	1.1154	0.924358	1.45848	1.57557
A0A369J5G2	2.63714	1.62096	3.00367	2.8491	0.447731	0.334891	0.364197	0.389704	0.66118	0.847712	1.02245	1.07165
A0A369JCF8	1.30973	1.62353	1.7072	1.49742	NA	NA	NA	NA	1.90521	2.91391	2.12309	2.62473
A0A369JXT6	1.8381	1.62452	2.73259	2.04251	3.44948	3.60757	4.75301	3.85504	0.178715	0.243136	0.221844	0.222674
A0A369J4F3	1.66571	1.62919	1.63745	1.51036	0.134027	0.151808	0.187769	0.186056	3.62593	3.75183	4.27393	3.51279
A0A369K0E4	1.95648	1.63273	2.1612	1.79854	0.3737	1.03583	0.827128	1.00073	2.7961	3.56053	2.96862	2.94179
A0A369KDV5	1.39778	1.63373	1.45148	1.5997	1.30284	1.08657	1.21268	0.962587	0.851358	0.843261	0.703844	0.503973
A0A369JFT3	1.62502	1.6398	3.3531	1.66872	0.663945	0.484105	0.224357	0.191639	5.0148	8.30203	6.00582	9.15587
A0A369JJJ6	1.58182	1.63986	1.50498	1.78771	1.60885	1.72575	1.77763	1.65244	3.70984	4.08306	3.2201	3.82917
A0A369JB29	2.37515	1.6407	1.93118	1.42122	32.717	22.3831	32.8348	32.655	1.89202	0.898421	1.47566	1.39962
A0A369JHZ7	1.49084	1.64111	1.74052	1.54137	0.335621	0.449569	0.431318	0.553989	2.04227	1.77566	1.97715	1.3434
A0A369K3K5	0.302241	1.64505	0.342086	0.47502	1.24787	1.32707	0.939479	0.701606	0.352739	0.392212	0.34004	0.444455
A0A369J7S8	1.60588	1.6457	2.08642	2.0767	0.76539	0.64057	0.525363	0.779457	2.0123	2.181	2.20242	1.65641
A0A369KH52	2.06876	1.65175	1.54399	1.55983	0.885639	0.997316	1.129	1.16017	2.31644	3.44044	4.08601	3.00631
A0A369J678	1.95362	1.65987	2.00744	1.765	1.09486	0.980575	1.06626	1.26962	1.06187	1.42614	0.996261	1.63613
A0A369JQV2	1.73265	1.66704	1.61803	2.07681	22.9482	24.0944	26.2015	25.919	1.87615	2.09419	1.62493	1.55559
A0A369JQD2	1.46045	1.67455	1.55327	2.63713	4.1701	4.00345	3.77264	3.54148	1.14023	1.68893	3.68486	1.18459
A0A369J6Q4	2.02861	1.67468	2.04766	1.8637	1.33148	1.49378	1.60309	1.0596	2.52293	2.69813	2.15982	2.23427
A0A369K024	1.92209	1.67734	2.31115	1.01208	5.30976	5.04577	5.15258	5.56237	2.40774	2.51447	2.62164	2.7496
A0A369JM88	1.2324	1.68279	1.44048	1.58538	4.1686	4.19422	4.99835	4.08304	0.182437	0.132622	0.163098	0.302486
A0A369JWX1	1.48552	1.68964	1.20798	1.34306	1.40215	2.12382	2.05648	2.01704	0.537024	0.951848	0.393098	0.551184
A0A369K1H6	1.84577	1.69418	1.67587	1.49667	0.571235	0.445616	0.46093	0.460211	1.77246	1.95297	2.03833	2.37637
A0A369J8G0	1.61657	1.69771	1.72844	1.67786	0.288587	0.373376	0.261634	0.22988	2.79852	3.68268	2.89102	2.38654
A0A369JAZ4	2.31956	1.69858	2.33942	1.81205	2.43731	2.97374	2.8901	2.97149	4.01207	4.27325	3.47037	3.91433
A0A369J580	1.73051	1.70525	2.78108	1.59314	17.486	14.9733	19.6145	14.2595	9.79245	9.39685	9.8099	8.27412
A0A369JUA5	1.93686	1.70956	2.07646	1.75984	NA	NA	NA	NA	0.575593	0.736673	1.10265	0.564523
A0A369JA49	1.13765	1.71174	1.31814	1.22454	1.32223	1.06212	0.972637	1.38533	NA	NA	NA	NA
A0A369JLD7	1.73878	1.71925	0.388159	1.65583	6.23523	7.19426	6.72127	5.91414	1.18705	1.6206	1.72564	2.00432
A0A369JKC6	1.94222	1.72547	1.86486	1.23628	0.401432	0.100551	0.106295	0.20771	2.07973	2.05214	1.64343	2.21792
A0A369K0R7	1.8037	1.73349	1.78174	1.65909	0.433621	0.505735	0.346439	0.449035	3.61352	3.99748	3.49926	1.79901
A0A369JGX4	1.55197	1.74202	1.30926	1.5101	NA	NA	NA	NA	1.836	1.48161	2.51667	1.82719
A0A369JYE8	1.79892	1.74303	1.67599	1.66054	0.421814	0.301412	0.274073	0.258942	2.69203	2.64208	2.65834	2.72137
A0A369KCW9	1.68983	1.74537	1.5855	1.84443	0.565379	0.839197	0.438878	0.781574	0.344681	0.506091	0.482795	0.428232
A0A369J755	2.06102	1.74593	2.30791	2.34506	11.8099	11.355	11.5392	11.9111	5.35894	4.78647	4.73817	4.71649
A0A369J6C1	1.74076	1.75131	2.27416	2.0755	0.21312	0.214115	0.644297	0.262383	1.28646	1.50625	1.08639	1.40585
A0A369JT12	1.64155	1.75288	1.42669	1.42457	1.15972	1.4201	1.10821	1.31366	0.277188	0.306723	0.164612	0.249999
A0A369K4T8	1.71061	1.7561	2.68526	2.05279	1.91505	2.46831	2.29971	2.67248	2.42124	2.58181	2.12903	1.4441
A0A369JN75	2.54139	1.75655	0.570265	1.91105	0.582874	0.461719	0.646258	0.381881	0.67327	0.662694	0.696376	0.950794
A0A369K7V5	0.441891	1.7643	0.889463	1.31562	NA	NA	NA	NA	0.290133	0.926254	0.83858	0.692932
A0A369JSB5	2.88996	1.77403	2.20326	2.85958	2.33806	2.65462	1.13142	1.89222	1.32915	2.54275	1.9038	2.09621
A0A369JXQ4	1.33491	1.77487	1.46499	1.45933	NA	NA	NA	NA	1.13449	1.12085	0.824573	0.947822
A0A369JLR5	1.81361	1.7769	1.75213	1.74429	3.05236	3.02784	3.12584	2.78132	2.13094	2.39457	2.38847	2.52948
A0A369JUR4	1.90857	1.79133	1.91684	1.87879	9.56242	10.0721	10.4202	10.0226	1.32884	1.82381	1.69927	1.70882
A0A369J8T2	1.31453	1.79582	1.59275	1.84566	0.920229	1.16047	1.20703	0.781778	2.65121	3.85165	2.97178	3.37678
A0A369JDU1	2.34076	1.80756	1.93107	0.870754	10.9368	9.05225	10.0632	10.5818	1.81093	2.45768	1.74527	1.54098
A0A369JDC7	1.01796	1.80909	1.69095	1.16696	2.83551	2.56795	3.19928	3.57461	0.41483	0.423726	0.277594	0.411238
A0A369J9S9	1.27117	1.81143	1.58528	2.00893	0.448981	0.441637	0.305269	0.404279	1.45539	2.15834	1.66746	1.41782
A0A369J7T2	1.99815	1.81931	3.26503	2.52607	1.63913	1.59123	0.986565	1.15376	0.777266	0.784273	0.774902	0.824201
A0A369JA37	2.49875	1.81958	2.89457	1.69092	2.02187	1.74396	1.85597	2.50469	3.79977	3.62789	3.59525	4.33427
A0A369JTG6	1.64957	1.82406	1.34411	2.00229	7.10425	7.02823	6.99028	7.44766	1.05052	1.43545	1.0708	1.39069
A0A369K119	1.81554	1.8254	1.96556	1.14767	2.48187	2.65645	2.79897	2.90827	0.396834	0.294384	0.34532	0.62883
A0A369JAS5	1.85064	1.82554	1.84692	1.37965	12.5087	10.4425	12.7239	12.8007	1.60533	2.90393	2.28806	1.75369
A0A369JXM0	2.25441	1.83691	1.63926	2.23873	0.464831	0.360094	0.886833	0.728298	2.4188	2.25265	2.95668	2.05554
A0A369IYM9	1.72869	1.83901	1.76352	1.71763	0.291976	0.341591	0.331448	0.368401	1.09802	1.01758	1.26565	0.910915
A0A369JMC7	1.5426	1.84028	1.55097	1.54883	0.202404	0.274228	0.275787	0.268624	2.88697	3.2863	2.70854	2.72522
A0A369JLW7	2.5144	1.84065	3.62691	3.39738	14.6698	14.217	14.696	13.4356	1.80892	2.0306	2.08287	2.18896
A0A369JUP6	2.07814	1.84772	1.64646	1.77897	0.260767	0.237109	0.117304	0.124381	5.48154	5.28657	5.87543	5.47788
A0A369KCD9	2.09576	1.84837	2.25459	2.35768	3.40731	3.12653	4.4159	2.74667	1.90566	3.19171	2.10682	2.3406
A0A369K4R0	1.3204	1.84892	1.42898	1.70305	0.163046	0.192937	0.167438	0.143647	3.12573	3.10716	3.12503	3.35653
A0A369K762	1.80022	1.86742	1.92091	1.75372	0.0868545	0.0971531	0.110169	0.104223	1.4114	1.18677	1.0781	0.955619
A0A369J802	1.74217	1.87034	2.07781	1.67972	7.76855	7.00948	7.08366	7.90198	4.47621	4.16921	4.18977	3.45776
A0A369JJ99	1.92383	1.8724	1.67669	2.85274	0.31933	0.246837	0.289924	0.254498	2.26361	2.86993	2.10266	2.75328
A0A369J175	2.50278	1.8794	2.03682	1.77183	0.0692841	0.123818	0.133607	0.167078	1.18148	1.54262	1.32925	1.32528
A0A369K928	1.70746	1.88015	1.3434	1.66892	7.11948	6.95793	6.04596	6.07847	1.64037	1.58477	1.13612	2.07703
A0A369JAE3	1.73475	1.88068	1.71587	1.51951	2.39971	2.58269	2.40925	2.73161	2.84763	3.34892	2.22374	2.60535
A0A369K8J5	0.764808	1.89118	1.08543	1.3637	0.228684	0.179644	0.176726	0.256458	1.47224	1.79474	1.48909	1.3289
A0A369J1C8	1.85505	1.89595	1.27083	1.59199	0.18042	0.68681	0.123958	0.411658	4.07528	3.25388	4.07429	4.28156
A0A369J9V9	1.93748	1.89639	2.10716	1.87596	1.03397	1.40825	1.42038	1.45887	1.26643	1.95019	2.2046	1.61104
A0A369K1M4	1.81314	1.89888	1.7819	1.87714	2.37535	2.82625	2.53179	2.58644	0.465912	0.36043	0.403129	0.472563
A0A369K9E4	1.59338	1.91033	1.20643	2.58489	1.39259	1.34808	1.17515	1.36564	2.58862	2.59153	2.0109	2.87711
A0A369KD97	1.8671	1.92139	0.669556	1.55223	1.41708	1.22501	1.3729	1.42871	NA	NA	NA	NA
A0A369JJ62	1.91437	1.92771	1.82976	1.5524	1.00133	1.15458	1.04237	1.13509	2.62267	2.14447	1.53159	1.64623
A0A369JA40	1.797	1.93504	1.09552	1.49835	1.84173	1.55944	0.888521	1.5264	1.39179	1.62296	1.65897	1.27716
A0A369JZP7	2.57769	1.93838	1.75724	2.37838	2.43948	2.89972	2.75939	2.69674	1.77646	1.63427	1.79352	1.34666
A0A369JLT2	1.57251	1.94217	2.06028	2.04896	2.59459	3.59833	2.90513	3.35064	3.30374	3.51625	3.04893	3.45261
A0A369JJX7	2.10699	1.95155	2.56706	2.6838	0.103671	0.0740811	0.0535314	0.0832541	4.30536	4.86887	4.33189	4.80667
A0A369JVD2	1.01525	1.95614	1.59778	0.982688	40.7311	43.0492	41.7951	45.6372	2.00749	2.61563	1.8876	1.70423
A0A369J4Z3	1.81318	1.95853	1.56847	1.52072	11.2269	10.3196	11.0498	10.8782	1.52217	1.9516	1.48558	1.03667
A0A369JE95	2.30301	1.96232	3.11583	2.37983	0.780984	0.673509	0.854841	0.63812	5.69027	5.74415	5.1984	7.30992
A0A369JI83	2.00231	1.96985	1.97385	1.92172	12.1715	11.9381	12.6034	13.2944	2.8255	3.60496	2.82503	2.83788
A0A369JCF4	2.61992	1.98146	2.3198	2.58476	0.206032	0.151777	0.280783	0.156788	3.15955	3.59439	3.31168	3.81153
A0A369JDX5	2.83633	1.99112	3.17515	2.89157	0.204079	0.162251	0.159646	0.171844	2.19604	1.87806	2.08829	2.29294
A0A369K3A5	1.93451	1.99474	2.72405	2.36035	0.0409465	0.151062	0.0322881	0.262843	2.18074	2.23973	2.64807	1.99239
A0A369J7U8	1.92613	1.99966	1.75136	1.5229	1.90054	2.00555	2.1639	1.37697	1.03087	1.55409	1.0754	1.05494
A0A369JPD6	1.69696	2.00666	2.06667	1.75061	3.30273	3.49609	3.298	3.36733	1.49895	1.82986	1.75731	1.48578
A0A369JU46	1.95716	2.01104	0.970205	1.94645	3.49019	4.07007	3.88566	3.08952	0.542467	0.486539	0.41472	0.576715
A0A369JUK6	1.8216	2.02049	1.77245	1.8671	0.432501	0.351083	0.364912	0.477192	2.97994	3.49025	3.56845	3.77641
A0A369JWS2	2.00778	2.04466	1.88091	1.8747	0.114338	0.132439	0.0737808	0.102433	3.17518	3.39903	2.78849	3.76325
A0A369KGB5	1.70786	2.05336	2.32244	1.40803	13.0333	12.8053	13.6964	13.2113	2.68036	3.10413	2.46831	2.25388
A0A369JW83	1.8704	2.05379	2.23696	1.84168	4.77453	5.2441	5.15507	5.73918	2.73901	2.01342	2.74057	1.70672
A0A369JGQ2	0.737909	2.05459	2.9409	2.21828	27.7218	27.7323	24.7412	26.9998	6.55927	6.47306	6.24569	5.01733
A0A369JK54	1.83424	2.05678	1.18999	1.56849	0.139871	0.190782	0.221864	0.14085	2.06562	1.65097	1.98277	1.66312
A0A369JCS7	1.71349	2.05723	1.95181	1.94064	0.573486	0.109731	0.463437	0.494813	4.532	2.87496	1.95956	2.82651
A0A369JT26	1.68486	2.06144	2.11762	2.27439	0.687823	0.798562	0.647452	0.996803	3.0827	3.18635	1.26935	1.17124
A0A369JGI9	3.17087	2.06198	2.93908	2.04496	0.13628	0.163411	0.153804	0.300597	1.1676	1.90338	1.95347	2.4582
A0A369JF44	2.05179	2.06283	1.59434	2.10661	0.204131	0.203551	0.405438	0.26385	4.50974	4.39009	5.36188	4.83271
A0A369K823	1.73856	2.0666	2.07436	1.84412	NA	NA	NA	NA	5.90715	6.93679	5.10484	4.58566
A0A369JQS8	2.69265	2.06752	2.42226	1.99347	3.931	3.64623	4.53447	3.08608	0.155822	0.172518	0.182229	0.662867
A0A369KA27	2.25145	2.0683	2.36745	2.73469	2.3667	2.61349	2.39274	2.55095	5.99215	3.47304	3.93884	4.03013
A0A369K2J4	1.64943	2.07662	2.24372	2.1419	1.02561	0.765169	0.718083	0.662623	3.43503	3.73525	2.79465	2.97287
A0A369J940	1.35001	2.08256	1.66878	2.14443	1.83212	1.48744	1.78287	1.96157	0.860315	0.688656	0.819054	0.663985
A0A369JCF3	2.35767	2.08689	2.10515	2.11038	3.1955	4.28552	4.11419	1.8637	4.33121	4.36257	3.24924	4.06498
A0A369K2K0	2.13506	2.08779	2.08697	2.32014	0.119472	0.352584	0.271607	0.296249	0.977746	1.05033	0.805773	1.12168
A0A369JIP0	1.83093	2.08884	1.92967	2.12972	NA	NA	NA	NA	2.67767	2.14709	1.78817	2.22837
A0A369K5E4	1.73654	2.09301	1.88799	1.82281	2.34862	2.02796	2.79176	2.39462	3.03819	2.72334	2.62915	2.56977
A0A369JMB9	1.43146	2.10116	1.86889	1.59348	3.27653	3.61069	3.29808	3.09458	2.53291	2.61199	3.16329	3.03474
A0A369J768	0.261119	2.1063	2.112	2.00435	0.118451	0.119436	0.581104	0.356689	4.29659	3.43851	3.92471	3.53415
A0A369JP53	2.37504	2.10675	2.15288	1.72411	NA	NA	NA	NA	1.62233	1.49786	1.6945	1.65416
A0A369JMA2	1.50757	2.10901	2.10381	1.84033	1.34957	1.45168	1.19019	1.24867	2.59989	2.84998	2.65064	2.32697
A0A369KFQ0	1.77301	2.11733	1.86937	1.98969	NA	NA	NA	NA	0.865966	0.985526	1.08814	1.30937
A0A369JQL3	1.97671	2.118	2.10876	1.61022	1.80885	2.07419	2.19944	2.49785	1.84605	1.65471	2.27779	1.27566
A0A369JMN6	1.77682	2.13015	2.22788	2.53034	4.60306	4.00425	4.65546	4.37358	1.83269	2.52416	1.53385	1.89415
A0A369K238	1.65754	2.13667	2.74803	2.39849	0.0813314	0.188361	0.242668	0.0774347	1.93161	2.57745	2.18417	2.11166
A0A369JYQ3	2.198	2.13864	1.89806	2.30772	0.749833	0.599732	0.243452	0.258505	4.18748	4.08061	3.57096	4.20365
A0A369J5W0	1.31621	2.14374	1.88649	1.36927	0.756543	0.888903	0.730475	1.18447	1.78433	2.58695	2.06105	1.76117
A0A369JRV6	1.96857	2.14771	1.59812	2.10531	2.10311	2.54291	3.10645	2.06948	4.52298	5.26438	6.36661	4.73711
A0A369J6D5	2.45151	2.15861	2.62109	2.83705	2.6915	2.57049	1.91896	2.16167	3.1922	2.79243	2.80229	3.20297
A0A369K756	1.11534	2.16097	1.6545	1.53688	0.776343	0.356178	0.727922	0.810774	3.56301	3.85216	2.9358	3.2327
A0A369JH36	2.15671	2.16303	1.82481	2.02513	1.66104	1.82959	1.41183	1.70557	2.54245	2.67943	2.68349	2.51629
A0A369KA31	3.14373	2.16731	4.05995	3.5746	1.04103	1.70726	1.36898	1.06852	0.94097	1.22181	1.65422	1.20767
A0A369JB27	1.81299	2.17023	3.21919	2.06285	NA	NA	NA	NA	0.467258	0.437649	0.479579	0.365892
A0A369JSR1	1.87751	2.17083	1.87973	1.93343	NA	NA	NA	NA	1.39494	1.49919	1.48806	1.58591
A0A369J2L5	2.38932	2.17313	2.39331	3.49868	6.69757	6.63018	5.92904	5.93881	1.08434	1.00011	0.673218	1.08727
A0A369K2K3	2.06938	2.1781	2.70813	1.80435	21.2061	20.5997	21.7905	22.2978	1.95915	1.30119	1.48805	1.7966
A0A369JKC2	2.2708	2.17909	1.12985	2.01952	NA	NA	NA	NA	3.67941	3.2118	3.74733	3.60532
A0A369J8W6	2.29924	2.17957	2.15188	2.14779	4.19387	3.67906	3.7807	4.55985	3.50863	3.31653	3.72038	3.87709
A0A369J0W4	2.41614	2.18184	2.66368	2.05257	0.930273	0.77556	0.771054	0.982429	1.46242	1.42077	1.52425	1.6598
A0A369KEF2	2.39932	2.18235	2.07248	2.22991	0.737749	0.735035	0.772959	0.849597	1.34149	1.18814	1.484	1.11156
A0A369K6R5	1.99805	2.18369	1.98352	2.15534	NA	NA	NA	NA	1.74545	1.94829	1.67051	1.85586
A0A369KEW7	1.79987	2.1873	2.38004	2.98696	26.1818	24.5272	26.1593	31.1643	16.2113	15.0012	19.3415	20.4685
A0A369JRG7	2.55129	2.19141	1.90837	2.16463	NA	NA	NA	NA	5.30411	5.80377	5.56574	5.30926
A0A369JFQ1	2.31332	2.19551	2.55064	2.00396	3.76582	4.86189	5.86657	4.79379	1.03211	1.1535	0.840601	1.13933
A0A369JG85	2.45852	2.19929	2.93483	2.11789	17.3788	19.8886	16.6351	19.7244	1.2924	1.61589	1.65261	1.87324
A0A369JU17	2.6559	2.20458	2.11992	1.87945	6.93234	7.3651	7.72205	6.97966	1.03555	1.66072	1.35961	1.61422
A0A369JEZ9	1.91134	2.21628	2.05947	2.10074	1.23265	0.918485	1.02847	1.41335	0.765522	0.213245	1.30288	0.145959
A0A369K5X4	3.5354	2.24033	3.47491	3.1352	54.0155	57.7154	56.0839	58.2973	6.87094	6.63973	4.54641	6.53034
A0A369J8L4	2.20342	2.24196	1.82898	2.10455	18.0936	18.3755	18.4104	19.3314	2.61414	1.08991	2.33997	2.87463
A0A369JB12	2.60488	2.24774	1.72155	1.9581	4.35321	3.68128	5.03073	4.13378	2.60579	2.50641	2.53524	2.80031
A0A369JHU7	2.33502	2.25076	2.26723	2.08383	0.283264	0.359803	0.223523	0.366332	3.24119	3.60061	3.39053	3.51724
A0A369K7D4	2.62924	2.25711	2.60084	2.51494	0.64616	0.586865	1.14052	0.729437	4.68493	5.15654	4.25113	4.74616
A0A369K773	1.70401	2.25868	1.26723	1.21399	5.62844	5.8668	4.24156	5.86283	1.34149	1.35519	1.81718	1.33307
A0A369K2A7	2.54104	2.26289	2.09744	2.27649	5.42309	4.92306	5.26185	5.65712	3.64003	3.75766	2.89378	3.39953
A0A369JRP0	2.34954	2.26425	2.45216	2.25288	15.5403	18.5848	18.3811	19.7472	0.157484	1.521	1.03579	1.40496
A0A369JN44	1.89658	2.28516	2.05583	1.70956	2.93277	2.59573	3.9565	3.57986	2.68352	2.65266	2.20588	2.72239
A0A369JPZ0	2.33397	2.28952	2.39995	2.67984	0.311912	0.256814	0.29268	0.366725	2.35774	2.35567	3.00383	2.9197
A0A369JG77	2.9626	2.29374	2.09609	3.09349	25.6506	26.0721	25.039	24.8301	4.76631	2.79465	4.83281	4.86109
A0A369JSR9	1.87281	2.29396	2.28066	2.07351	1.06801	0.710676	0.642681	0.551777	1.6179	1.77557	1.58239	1.62153
A0A369K7X5	1.80795	2.30238	2.00735	2.09763	3.01426	2.45017	2.05813	2.24748	1.23533	1.36458	1.62173	1.04976
A0A369J3Y8	1.7097	2.30452	1.49512	1.62607	1.43444	1.06468	0.809505	0.888596	7.81197	8.86083	7.83992	8.93796
A0A369JMQ4	2.36509	2.30551	2.47577	2.95817	0.866328	0.466843	0.682201	0.602236	0.505134	0.662374	0.628326	0.605135
A0A369JUQ1	2.0928	2.30792	2.14507	2.16112	5.53048	6.4861	6.53821	6.62163	0.621148	0.600761	0.691096	0.70492
A0A369JPR7	2.37033	2.31182	2.1531	1.77348	5.28254	5.67624	5.44342	5.70552	2.31494	2.68763	2.95849	2.24491
A0A369K5I0	1.89754	2.32085	1.88824	2.71519	NA	NA	NA	NA	5.69037	4.1352	4.68569	5.34774
A0A369JHY6	2.11988	2.32157	2.4307	1.65826	0.778493	0.845292	0.996695	1.08581	2.21431	2.74209	2.00283	2.2172
A0A369K6I8	2.67477	2.33877	2.4575	2.46391	0.208674	0.168472	0.450608	0.552848	3.63125	4.16303	3.14151	4.27334
A0A369JMY5	1.60537	2.34333	1.40819	1.34273	7.72632	6.7999	7.01259	7.18012	1.14743	2.17521	1.04844	2.13306
A0A369JUE6	1.69901	2.35091	1.67349	2.25277	0.0998575	0.200177	0.581084	0.108378	3.22195	3.42296	3.37028	3.18136
A0A369J3T0	2.15242	2.36763	2.81954	3.5661	0.412397	0.80039	0.626644	0.684288	4.02903	4.96548	3.97841	4.46321
A0A369J9C6	2.90816	2.36959	1.60449	3.24578	2.74731	200.243	2.70197	1.34846	2.29287	2.28834	2.24642	2.4519
A0A369K6L4	3.02811	2.37179	2.77777	2.54243	1.90558	2.25045	1.68427	1.44144	7.96253	7.4426	6.41927	6.17842
A0A369K9J7	2.276	2.3753	2.3435	2.39506	5.90672	2.71004	2.03276	2.21197	2.72399	2.95376	2.72576	3.81524
A0A369KA45	2.15174	2.38256	1.9067	2.09688	0.156857	0.0568459	0.151239	0.116048	2.08908	1.82856	2.05608	2.55247
A0A369K8U1	2.59341	2.38375	1.97979	2.21781	NA	NA	NA	NA	4.48089	4.41981	4.33511	4.58454
A0A369J8K5	2.4994	2.39756	3.32635	3.15166	2.83135	2.32624	2.39697	2.61064	1.39418	2.2932	1.86704	1.70854
A0A369K9L4	2.0346	2.41139	1.83484	2.24279	NA	NA	NA	NA	3.80448	3.5468	3.90294	4.04597
A0A369JJ55	2.2711	2.41438	2.41133	2.95592	8.27241	8.1451	9.75993	9.29533	2.31255	2.59002	2.99538	2.78762
A0A369JYF5	2.12222	2.41756	2.27576	1.88928	2.13226	2.28377	1.9596	2.02819	2.69188	2.51643	2.90432	3.1415
A0A369J648	2.29423	2.42808	2.97949	2.55876	16.8324	16.3023	15.1331	16.3257	6.90665	11.5001	6.35514	6.97646
A0A369JD10	2.37543	2.43803	1.7285	2.36563	4.66181	4.75209	3.92358	4.0217	1.10563	0.898788	1.50097	1.54029
A0A369K2G0	2.36092	2.44469	2.14291	2.37057	4.55393	3.98643	4.41747	3.78185	1.36766	0.851405	2.86433	0.921666
A0A369J8N6	3.02586	2.45046	2.81901	2.91056	3.43021	3.56671	3.10221	5.47922	1.26855	1.23402	0.835605	1.00878
A0A369JTP6	2.03378	2.45645	3.54342	1.92048	1.40417	1.66184	1.14926	1.99416	1.41485	1.49723	1.77689	1.70128
A0A369K0F4	2.53656	2.46022	2.18662	2.08563	0.31264	0.326965	0.10598	0.17938	2.01003	2.39786	2.21254	2.38773
A0A369JU80	2.48578	2.46921	3.35219	2.55212	0.685043	0.546633	0.593123	0.610809	2.15028	2.12125	2.10075	2.26718
A0A369J5U9	2.31651	2.46975	1.53156	2.24029	0.279673	0.438677	0.242135	0.271174	5.51828	5.57439	5.36255	5.42926
A0A369JQY3	1.17847	2.47542	1.91201	2.08434	104.648	98.919	97.3367	100.066	1.8247	2.50594	1.27767	1.7812
A0A369J0G3	1.90033	2.50657	1.88726	1.68756	4.25959	4.14284	4.07642	4.02619	2.38997	2.20734	1.91204	1.55564
A0A369K147	2.53778	2.51833	2.08238	2.58475	3.84842	3.58342	3.21032	3.94896	1.81049	2.02816	1.79765	1.74681
A0A369KDT1	2.32377	2.52255	2.2189	2.71347	0.858758	0.573613	0.79287	0.257689	4.63896	4.10592	4.73259	4.0946
A0A369JFZ1	1.81372	2.52836	2.36864	1.03965	2.89664	4.50704	3.14847	4.46471	0.267978	0.353762	0.245125	0.527687
A0A369JGB2	2.65774	2.5312	3.15472	2.46441	1.34448	1.28785	1.38868	1.41465	2.13018	2.81712	2.01226	2.17668
A0A369JBA9	2.36524	2.53915	2.29544	2.7804	11.5415	10.392	12.9114	12.4877	1.4036	1.2745	1.31792	0.879325
A0A369J4I5	2.26325	2.55479	2.50566	2.16966	1.63646	1.67288	2.05209	1.91976	2.2687	2.85168	3.0371	1.71933
A0A369JX32	2.50626	2.56344	2.40921	2.64431	6.35918	6.28324	4.99253	5.29105	4.61222	4.32855	3.64287	3.96863
A0A369JGV4	2.81387	2.56721	2.45072	7.19705	29.6971	27.4944	29.2355	27.8297	3.22809	3.08186	3.44656	2.98811
A0A369IYS2	2.63114	2.58096	2.63153	2.49882	7.76132	7.35176	5.99557	8.22085	3.16838	3.14809	3.83216	3.64531
A0A369JHT1	2.37168	2.58327	2.4349	2.20998	1.99404	1.89652	2.12302	1.77151	2.12668	2.24176	1.87428	2.2995
A0A369JF59	2.46338	2.59263	2.09568	1.52819	19.9305	21.726	21.9258	23.2199	3.27359	3.50799	2.99388	2.79888
A0A369K981	2.37908	2.59305	2.56904	2.72695	23.8874	23.7315	24.259	22.4886	2.34718	2.09708	2.46634	2.51829
A0A369K761	2.66629	2.59668	2.5286	2.93842	7.79151	7.897	7.38252	8.55323	1.52738	1.26224	1.50577	1.80382
A0A369JZS2	3.05415	2.60035	2.6767	2.12913	0.797294	0.708227	0.613088	1.16725	6.66057	7.07279	5.53091	5.13233
A0A369JE87	2.08567	2.62882	2.01947	2.28717	NA	NA	NA	NA	3.44079	3.16078	2.33666	3.27974
A0A369JKA6	2.07701	2.62967	2.34062	2.04229	3.88496	4.12232	4.32799	4.88444	0.903128	0.569456	0.660803	0.683132
A0A369JIS2	2.45293	2.62998	2.26976	2.64383	1.72043	1.55219	1.36994	1.9067	2.78663	3.07338	2.53736	2.73486
A0A369JCS1	1.64487	2.6418	1.27755	1.85917	NA	NA	NA	NA	1.17323	1.20528	1.30227	1.62439
A0A369JR44	2.70964	2.64823	2.77284	2.23977	2.84908	2.94673	2.63428	2.91451	0.297721	0.715491	0.533084	0.649629
A0A369J5L2	3.10441	2.65479	2.61057	2.79459	0.945543	1.2039	1.00729	1.41742	2.4481	2.23859	2.49146	2.55868
A0A369JUE7	2.69586	2.66707	2.44805	4.24649	10.6133	11.0566	10.1746	10.5074	0.149805	0.529412	0.102873	0.0631031
A0A369J5I8	2.69811	2.67539	2.65824	3.05151	6.27112	6.89714	7.30015	6.60777	4.47472	4.91239	3.66656	4.49933
A0A369K3N9	2.28315	2.69015	2.21165	1.74018	0.178569	0.294713	0.258712	0.294508	2.77062	2.26313	2.70402	3.40362
A0A369JFL8	2.62473	2.69736	2.28353	2.53476	7.88541	7.56756	7.63189	6.76792	1.74368	1.95216	1.60946	1.86246
A0A369JIQ7	1.8411	2.7051	2.8842	2.34461	NA	NA	NA	NA	2.40259	2.41606	2.95271	2.35662
A0A369JBD3	1.72471	2.71385	1.77596	2.04728	NA	NA	NA	NA	2.26895	2.47464	1.92381	2.5258
A0A369K4L9	3.01904	2.71659	2.11098	2.20805	5.33294	4.91828	5.26696	4.02851	0.694299	0.670133	0.882779	0.965616
A0A369JVJ7	3.74725	2.72389	4.54152	3.92221	27.9565	28.2348	25.9316	27.178	3.56424	3.4775	4.07446	3.10681
A0A369JUX2	2.67638	2.73986	1.68413	2.26671	2.79362	2.82111	2.76857	2.86763	2.0563	2.30815	2.19907	2.36308
A0A369JP67	2.20986	2.74998	2.40277	2.94328	3.41192	2.93074	2.80228	3.11957	4.25407	3.60347	5.35273	3.88121
A0A369JN52	2.92011	2.75141	2.34778	2.11174	10.4495	9.11796	10.0232	9.67053	5.1344	4.13925	4.72641	5.0521
A0A369J343	3.13992	2.756	2.82656	3.27325	22.4381	22.345	21.4955	21.8879	1.73548	1.52345	1.06747	0.784281
A0A369KFH7	2.8931	2.75956	2.99115	2.43111	21.7023	18.4762	21.1882	20.5788	1.33433	1.31333	1.95138	1.46651
A0A369JIN2	2.22792	2.77901	2.4863	2.86088	0.0514901	0.0431815	0.0567309	0.060062	2.27346	2.32279	2.78752	3.15593
A0A369KGM6	3.04612	2.78189	4.10404	3.50505	1.73921	0.807757	0.3093	0.242926	1.47594	2.00818	1.10917	0.480298
A0A369JLF5	2.02125	2.79359	1.56225	2.06962	30.9984	31.3895	29.6263	32.5763	0.512154	0.410797	0.530349	0.866483
A0A369KBH4	1.91954	2.79542	2.4888	2.34588	0.161078	0.707971	0.155303	0.144309	2.30578	2.31797	2.56356	2.05336
A0A369JS69	2.98074	2.81327	2.48375	2.96422	NA	NA	NA	NA	5.02839	5.61207	5.24701	4.23906
A0A369JLI4	2.86774	2.82029	2.89428	2.48372	NA	NA	NA	NA	0.32297	0.329058	0.384419	0.299066
A0A369K5H9	3.38567	2.82991	2.6874	2.52864	2.62646	2.29842	2.83008	2.39507	2.45126	2.39448	2.42623	1.96073
A0A369K8U3	2.44463	2.8319	2.58546	2.98756	3.03816	2.54887	2.87244	3.31646	3.22295	3.66045	3.21857	3.36843
A0A369JKD1	4.36275	2.83531	4.15321	2.72675	1.42529	0.817633	1.05467	1.78479	2.65099	1.69461	2.11713	1.65866
A0A369K4T3	2.5721	2.84045	2.62687	2.54168	12.5293	12.3468	12.335	11.4331	6.12122	6.94973	5.9171	5.85426
A0A369JK87	2.86817	2.84841	3.16404	2.72796	0.12721	0.0324841	0.0698122	0.134735	2.78303	1.7263	2.50115	1.90484
A0A369JF38	3.12563	2.8548	2.48177	2.6624	0.692753	0.273431	0.434128	0.620189	9.28189	9.48443	9.1579	9.7999
A0A369JX03	2.65128	2.85954	2.90846	2.87852	3.82428	2.40832	3.63399	2.00094	2.3862	2.4082	2.37852	1.97485
A0A369JFT0	3.06523	2.86441	2.95168	3.35408	0.423489	0.300552	0.520693	0.495126	6.05914	4.75623	4.75552	5.81632
A0A369K791	2.98926	2.8742	3.28211	2.50064	5.67678	6.30981	6.35557	6.01222	2.78689	2.30766	2.45961	2.77347
A0A369K1H7	2.32567	2.87689	2.02904	1.90185	0.236296	0.234732	0.236285	0.202529	1.03351	0.889818	0.854266	1.0185
A0A369J5A2	2.34972	2.88596	3.08433	2.77055	7.9683	8.86852	5.13193	7.7867	3.28038	3.74153	2.87019	3.37598
A0A369K052	2.84952	2.88772	2.69815	2.37347	18.7119	20.0204	19.997	16.6607	6.54814	2.61784	6.93301	5.41901
A0A369JVN3	3.32124	2.88899	3.07954	3.56416	0.394948	0.606948	0.447251	0.801867	5.39474	2.22362	5.6361	5.74025
A0A369JBP9	3.03593	2.89374	2.67774	2.11535	7.33413	7.27813	7.58748	7.83108	3.39169	3.27183	3.02661	3.05903
A0A369JIZ1	3.30268	2.89891	4.76639	4.13495	0.881641	1.32538	0.864142	0.854071	3.70436	3.54307	3.22022	3.92941
A0A369JVZ4	3.26201	2.92061	2.43196	2.40045	21.7127	21.8438	19.894	21.42	1.52046	2.05904	1.38183	1.70247
A0A369JLZ8	3.27616	2.92954	2.86893	2.89971	8.35281	8.92616	8.24996	7.31522	1.60782	1.54912	1.45647	1.45757
A0A369JUB4	2.23203	2.92972	1.95124	2.9355	1.18124	0.707924	0.73496	0.872288	1.27888	1.07471	2.07438	1.75848
A0A369JYT2	3.41285	2.93171	2.83747	3.54093	1.75573	2.17675	2.42856	2.54373	2.49232	2.47915	1.9654	3.0311
A0A369KAX2	2.1641	2.93354	2.8801	2.6312	3.15131	3.07841	3.20701	3.20274	9.13791	4.99619	7.8588	7.99412
A0A369JPA1	3.07146	2.93401	3.38783	3.23236	0.946736	0.862389	0.730681	0.949702	1.78385	1.25127	1.2992	1.09321
A0A369K8U0	2.75762	2.94858	2.70457	2.34541	0.428374	0.673128	0.436562	0.561149	3.05775	3.13472	3.11401	4.16922
A0A369JDK2	2.73133	2.95595	3.31445	2.39297	3.03898	2.51836	3.30015	3.6159	3.48173	3.50696	3.45428	3.77894
A0A369JQ68	1.80708	2.96004	1.95851	2.1754	1.59553	1.48867	1.26601	1.20312	NA	NA	NA	NA
A0A369K1T5	1.86197	2.96362	1.53597	0.00599961	2.12912	1.90721	1.89677	2.11174	0.948232	1.03149	1.12563	1.53932
A0A369JHT4	2.80616	2.96858	2.58913	2.8988	4.38887	5.47936	5.15706	5.70186	0.959657	0.985219	1.28232	1.12841
A0A369IZB3	3.04458	2.97623	3.08786	3.34158	0.966184	0.77599	0.735994	0.936051	3.49253	3.14841	3.50438	3.10068
A0A369JGF2	2.51849	2.98179	2.70866	2.72515	NA	NA	NA	NA	3.80225	3.22082	2.82116	3.2679
A0A369JUX0	2.36134	2.98199	2.35147	2.92649	2.03363	2.44787	2.40057	1.96412	1.52944	1.45972	1.62522	1.3612
A0A369JV11	2.75999	2.9936	2.70481	2.60909	0.552006	0.448005	0.648417	0.598332	2.7163	2.8628	2.60554	2.8096
A0A369JXF6	2.75508	2.99372	2.24299	2.93287	4.16407	4.02355	3.8554	3.23484	0.680584	0.615781	0.760321	0.692986
A0A369K0F5	2.69772	3.01037	2.93757	3.49686	5.86337	3.40196	5.07044	5.69143	2.27598	2.25513	2.62579	2.75808
A0A369JI25	3.25559	3.01255	2.66801	2.52445	0.0419455	0.583835	0.454001	0.305394	4.74176	5.63241	6.11885	5.34703
A0A369JHI9	2.91453	3.0246	2.94916	2.31548	0.21642	0.363595	0.285566	0.220595	3.63147	4.2269	3.40867	2.77335
A0A369J9M1	2.90542	3.02978	3.02343	2.49263	0.562621	0.425283	0.40822	0.519173	2.51108	2.71067	2.51504	2.22889
A0A369JC17	3.12155	3.03192	3.31596	2.73048	0.575324	0.556972	0.564765	0.588413	5.74023	6.28254	5.24606	4.00659
A0A369JNB0	3.18099	3.03835	2.85936	3.52447	8.08819	6.81679	8.05724	6.28676	1.15339	0.904257	1.90297	2.23334
A0A369K8Q1	3.04775	3.0454	2.5925	2.62189	1.02736	0.329528	0.976019	0.7657	3.25226	3.3289	3.45132	3.30015
A0A369JGS8	3.4335	3.04608	2.57815	3.12057	1.58696	1.56238	1.43246	1.49476	3.1887	2.3839	1.81467	2.41649
A0A369JPD1	3.1769	3.08226	2.80618	2.50071	14.3305	18.1845	17.84	19.7434	1.94344	1.79345	1.79079	1.88229
A0A369J966	2.99319	3.09717	4.15535	2.37807	3.96464	4.57249	4.27671	4.11992	0.0867418	0.128737	0.559156	0.0977304
A0A369KBM1	3.05662	3.09924	3.37025	2.73574	6.91124	7.9836	6.00021	8.03937	1.86154	2.82965	1.95206	1.83668
A0A369JSH7	2.42282	3.10035	4.09752	4.78923	5.63825	6.79238	5.92789	5.51028	2.9408	3.66526	4.06877	3.65512
A0A369JDW2	3.21916	3.10997	2.67986	2.94549	1.14139	0.7641	1.19739	1.17857	1.47873	0.206618	1.38555	1.45087
A0A369JLF0	10.8428	3.11347	7.01096	9.98219	9.83865	9.42254	9.74748	10.3964	9.87314	10.2849	6.00463	5.0512
A0A369K1G1	2.66884	3.1275	2.76735	2.44876	1.83599	2.56204	1.84555	2.0655	5.81378	7.35419	6.83405	5.83533
A0A369IYC7	3.3299	3.13178	3.61545	4.1527	30.0741	29.9954	27.8673	27.6127	3.70915	4.13013	3.31068	3.28071
A0A369K966	3.30249	3.16081	3.19053	3.18091	4.12072	6.07611	6.47296	6.40834	1.05685	1.10536	1.15502	1.132
A0A369K7V9	3.26763	3.16979	3.69734	2.99665	0.198809	0.193029	0.18374	0.266928	1.21761	1.39234	1.92326	1.29217
A0A369JSL1	3.65559	3.1865	3.74548	4.00663	26.0428	25.6096	24.1919	29.2257	2.20098	0.882755	1.78924	2.20149
A0A369JSY8	3.5699	3.19933	2.6028	1.9053	0.279883	0.0806759	0.383009	0.0862997	3.39953	3.89862	3.47692	3.94975
A0A369K3J7	2.49346	3.20253	2.7059	2.69777	2.59359	2.36581	2.64452	3.00543	0.886426	0.857167	0.499716	1.22155
A0A369K8P5	4.65543	3.21241	4.32059	3.51561	2.65546	2.64047	3.03432	2.79645	3.7128	4.21391	4.77074	3.87637
A0A369JFP7	3.39783	3.21656	3.31405	3.63992	0.94555	0.960128	1.03133	1.0874	5.51373	5.72953	4.63431	5.48662
A0A369JFE9	3.04872	3.22316	2.99988	3.74148	0.943076	0.832238	0.809205	0.670688	2.7277	2.55346	2.84582	2.55349
A0A369JHE6	3.00334	3.23467	3.63627	3.63769	5.85224	4.79358	5.94913	6.13051	4.6691	4.65296	4.01934	4.43285
A0A369K9I9	3.27869	3.2405	2.62844	3.30623	2.26697	2.00924	1.79265	2.58532	1.69483	1.7415	1.81783	2.04085
A0A369J7P3	3.46223	3.27326	3.32495	3.09637	1.58664	1.48262	1.44442	1.52004	6.42891	7.14935	5.55556	4.52891
A0A369J7M5	5.55646	3.27419	4.14713	3.68016	44.1924	42.1348	44.9279	44.2289	3.50923	3.80013	3.6913	2.96613
A0A369JXI5	3.47713	3.27908	3.5334	2.89775	8.93671	10.2822	10.4333	9.7835	3.36689	3.13551	3.3856	3.29669
A0A369JGZ0	3.13751	3.28245	3.43423	3.52768	10.8077	10.6207	9.50895	13.1465	1.91136	2.05034	2.52547	2.0161
A0A369JJQ6	4.1601	3.28471	3.56511	3.07137	9.53459	13.6082	11.1831	11.6843	7.1663	6.65732	8.01	6.4718
A0A369JJF5	3.33881	3.28818	3.25318	2.85563	0.317	0.516929	0.277878	0.290368	3.68568	4.03339	3.39664	3.40865
A0A369J8A6	3.29056	3.29038	2.95652	3.38525	1.15145	1.16452	1.09275	1.22551	2.26477	2.11414	2.35356	3.24512
A0A369JMZ9	1.58506	3.29409	2.11315	1.73175	0.18214	0.177698	0.133739	0.160421	1.2979	1.72073	1.90148	1.35692
A0A369JME0	2.96641	3.29438	3.46646	3.48946	3.51776	4.46021	4.2997	3.76542	1.00362	2.00955	2.08694	2.26218
A0A369JHJ9	3.61177	3.31891	2.65621	3.02022	0.914077	0.92564	1.01079	1.01409	9.53644	10.7014	10.065	8.32427
A0A369J7L9	3.08969	3.32954	3.32976	3.23402	26.5914	29.7244	27.8829	26.5898	1.48713	1.68554	1.49451	1.64132
A0A369K0L6	3.52202	3.34656	4.05333	3.86655	2.82101	2.87965	2.49343	2.62719	5.94663	5.88449	5.46942	5.94893
A0A369JNM7	3.0464	3.35835	3.69422	3.25012	32.9258	33.7048	33.3488	35.8633	4.0551	3.78571	4.05797	4.40434
A0A369JMS6	3.21771	3.3825	3.66792	3.19926	7.81706	7.04107	8.09897	9.37063	2.7577	2.63673	3.1788	2.95721
A0A369KA09	3.57364	3.38795	3.55404	1.23006	3.49572	3.20389	3.38226	3.33828	2.6009	3.15423	2.61177	3.14332
A0A369JBQ9	3.79003	3.40171	3.96437	4.16709	0.591344	0.580491	0.487645	0.467269	1.17488	1.40428	0.979759	2.41255
A0A369KHU0	3.30796	3.43034	3.03308	2.98912	0.462673	0.232037	0.290521	0.438997	9.35068	9.36108	7.794	8.72089
A0A369JAV4	2.67459	3.43466	3.03093	3.63824	0.487646	0.575775	0.639897	0.757165	2.62391	2.75516	3.37893	3.74949
A0A369K2I0	3.208	3.43536	3.58474	3.69768	4.17408	3.6001	3.81641	3.89416	9.93012	10.1031	8.76948	9.23072
A0A369K5D4	2.51436	3.44579	3.49063	2.39878	0.420135	0.274505	0.311274	0.412807	0.202639	0.19153	0.273328	0.292155
A0A369JRN3	3.70754	3.46056	2.77408	3.23403	9.67823	11.0272	9.60339	12.1235	2.87651	3.86162	3.36669	2.27323
A0A369K2B9	3.28177	3.48037	3.53288	3.49762	0.108167	0.114228	0.15949	0.127172	4.61767	5.03738	4.71939	5.02129
A0A369J1K1	2.40472	3.48549	3.94391	3.47522	5.38273	4.00318	5.14384	3.40091	4.75021	3.78498	4.47227	3.26782
A0A369K338	3.35564	3.48877	2.99919	3.39525	2.41378	2.02268	2.27489	2.35061	2.20216	2.84628	1.59203	1.56603
A0A369K6G7	3.68932	3.49238	3.44375	3.21958	3.73695	2.64069	3.61197	1.70664	2.73251	2.90649	2.36422	2.82539
A0A369JW23	3.54402	3.4927	3.58905	3.36313	2.43695	4.02479	3.39118	2.67052	2.08353	2.48515	2.39537	2.58232
A0A369K1D2	3.5486	3.50257	3.22914	2.74422	1.50031	1.23436	1.48082	1.29874	1.2268	1.30203	1.34617	1.38235
A0A369K0J9	3.82861	3.50792	3.96507	3.34226	9.16277	12.4062	13.9233	13.1154	3.00769	3.28516	3.19394	2.79127
A0A369KF18	4.27293	3.51331	3.55194	4.30787	10.2377	11.4115	11.3766	11.173	7.58099	8.01006	7.07146	8.35393
A0A369JEM7	3.37488	3.53542	3.04082	3.36581	0.277593	0.236298	0.271922	0.224296	8.59269	9.87594	8.54458	8.75612
A0A369JBI6	3.25056	3.57206	3.97398	3.21768	0.804074	1.03572	1.21751	0.879512	7.33081	6.30889	6.92042	6.98053
A0A369K0Z4	2.77798	3.57539	3.73295	4.15546	1.03774	2.12858	0.652935	3.09522	5.79634	4.6381	3.19613	2.74808
A0A369KEM8	4.08055	3.58696	3.29604	3.15017	0.0902338	0.0641552	0.099485	0.121219	3.26999	2.96078	2.8116	2.60078
A0A369K1P7	3.2894	3.61643	3.65462	3.35946	3.00374	3.07824	1.82497	2.48729	3.50214	3.47636	2.81634	3.86725
A0A369JM22	3.71665	3.62242	3.45793	3.4964	2.24079	2.51062	2.54871	2.90534	0.235244	0.276858	0.30793	0.362453
A0A369JXQ9	3.79502	3.64248	4.53453	3.54938	9.92775	8.60465	8.33336	8.96061	4.04517	3.73723	4.38285	4.02773
A0A369JZC7	2.12164	3.64437	2.22311	2.4122	2.05167	2.06471	1.62473	1.82072	1.21053	1.17665	1.65169	1.52357
A0A369JVL6	3.8735	3.64637	3.71396	3.80303	5.79737	6.00242	6.3087	5.4484	5.42419	5.75459	5.60855	4.32668
A0A369J8W0	3.44017	3.65417	3.40488	4.02036	0.895391	0.958464	0.84363	0.965588	1.2268	1.22257	1.3474	1.43311
A0A369JS86	4.30164	3.65518	3.7605	3.54665	NA	NA	NA	NA	5.52087	5.88649	5.26667	5.52053
A0A369JFC3	3.81124	3.6602	3.4684	3.58809	2.23474	1.6559	1.45063	1.4611	5.31672	6.91535	5.11977	7.16249
A0A369JHN0	3.93029	3.66303	4.37049	3.41551	10.0581	10.9331	10.4309	9.42274	4.8643	5.63747	4.01989	4.35646
A0A369JCT1	4.05362	3.67324	4.00104	4.11543	4.37377	4.30831	4.41099	3.36869	0.920328	1.05692	1.04281	0.958402
A0A369JP58	2.54648	3.67592	2.63488	2.58138	2.58056	3.53014	3.50881	3.10571	4.2146	5.02769	3.76259	4.2052
A0A369JGK3	3.39876	3.67645	3.38544	3.09262	3.08637	3.36962	3.50949	2.16486	3.5924	3.7257	3.14857	3.015
A0A369J4J2	3.35842	3.67718	3.58111	2.91267	0.982032	1.17771	1.05852	1.41065	5.13679	5.43315	4.50387	5.00929
A0A369JVF3	2.87576	3.69436	2.77674	3.68371	7.02875	7.13784	5.21648	6.25804	5.79885	6.00243	6.15272	5.79889
A0A369JT25	4.16262	3.69831	4.41472	3.33498	0.261099	0.345026	0.263119	0.243923	2.75	2.9434	2.90591	2.76329
A0A369JNG6	2.86489	3.70196	3.3642	3.33597	4.51365	2.97137	1.83101	2.40948	7.23421	8.45283	6.48488	6.70875
A0A369KB87	3.61786	3.7157	3.57777	4.07372	6.03654	5.91984	6.42642	5.07557	2.03493	2.2804	2.05915	1.87974
A0A369JAL5	3.5175	3.71944	3.3355	3.85901	21.9388	24.9105	23.2003	22.6299	10.405	13.4517	12.1898	9.53002
A0A369JKP4	4.50739	3.73983	2.35784	3.31504	7.60169	10.3947	8.66045	9.78516	0.901815	1.22362	0.160461	1.07902
A0A369JBI9	4.08662	3.74019	3.12873	3.23886	7.45704	7.66465	6.61669	8.3906	4.31243	4.55854	4.41624	4.9487
A0A369K480	3.99921	3.75377	4.22965	16.4585	11.8218	12.1838	11.7732	11.7058	7.0664	6.61966	6.69723	6.78583
A0A369KCV2	4.01991	3.78862	3.06624	4.3021	1.27382	1.99257	1.44076	1.96132	5.00014	4.10301	3.51836	5.03861
A0A369K080	3.68639	3.79057	3.5333	3.3464	0.312568	0.572506	0.471335	0.774962	1.56817	1.96631	1.85598	1.8762
A0A369K529	3.98415	3.79828	4.03524	3.8539	1.3774	2.31547	1.8925	2.02599	6.10207	5.23294	5.25485	5.14602
A0A369JHY4	3.46516	3.80483	4.7178	4.21693	2.29845	2.23321	2.06559	2.61302	5.64635	4.66722	5.71749	5.87747
A0A369JQB6	3.6489	3.8072	3.20523	2.9669	1.40384	1.76662	1.7379	1.62078	1.88896	2.17177	2.21684	2.17867
A0A369K5W8	3.60041	3.82104	3.10269	3.02035	2.23355	1.42029	1.01528	1.16475	5.12923	4.98451	3.54697	5.50221
A0A369JPQ3	3.29363	3.83448	2.66473	3.5374	1.77426	0.974194	0.880343	1.19164	4.93598	4.89773	3.74966	4.54498
A0A369J763	3.78371	3.84168	3.66555	3.37479	2.17524	2.26144	2.17913	0.91883	3.30262	3.25077	3.11832	3.52676
A0A369K093	3.18464	3.84395	2.87896	2.58011	0.617986	0.437302	0.727838	0.834172	5.76083	6.60464	5.48917	4.80853
A0A369JF14	4.34672	3.85272	3.61159	4.34642	0.253949	0.293624	0.212311	0.193094	1.85998	2.06495	0.684319	1.80241
A0A369JMM1	3.78235	3.8588	3.7657	4.08288	0.682874	0.50825	0.648806	0.870481	4.01887	3.07428	4.17092	4.11432
A0A369JE42	4.43366	3.86259	3.62382	4.13116	NA	NA	NA	NA	4.24164	3.90768	3.23127	4.06621
A0A369JI27	4.03398	3.90106	4.10438	6.44834	1.05522	0.983865	0.804477	0.987632	3.46659	3.29445	3.71284	3.99718
A0A369JUS1	3.89983	3.91402	4.02463	3.70808	1.84048	1.57276	1.68703	1.18661	4.25019	4.5032	4.39004	4.37327
A0A369JQC7	4.51866	3.91598	3.99354	3.70449	2.98634	3.89653	2.93684	3.96228	4.68479	5.0078	4.55356	3.98221
A0A369J5Z5	4.01524	3.92595	3.4624	3.81538	2.88426	3.21762	1.87786	3.85117	2.90311	3.82483	3.74001	2.8159
A0A369JR94	4.22361	3.94617	4.48806	4.13589	4.26385	4.5093	4.26091	4.28878	2.38469	2.55289	2.12006	2.51409
A0A369KDR0	3.33931	3.96276	3.18201	2.19383	0.0923178	0.36809	0.270973	0.121376	2.14853	2.01211	2.94357	2.3487
A0A369K562	4.76476	3.96945	4.27333	3.95588	1.69426	0.413531	1.49472	1.18184	5.44913	6.25007	4.66327	5.92835
A0A369K772	4.75909	3.99178	3.83155	4.27956	3.4338	3.16481	3.12546	3.61694	1.89093	2.0917	1.98907	1.72785
A0A369JIE4	2.60023	4.00689	2.29639	2.08195	3.15788	2.51856	3.16789	3.59209	1.97392	1.67066	1.77228	1.94463
A0A369JCT5	3.4101	4.01259	4.02306	3.58506	7.5676	9.14208	8.31499	9.28278	1.73732	1.8142	1.74298	2.20084
A0A369K651	3.32259	4.01276	3.98266	4.18836	14.186	14.6878	13.6496	14.2979	3.20956	3.07039	4.0545	3.52316
A0A369JK39	3.22275	4.01871	2.83431	3.18359	5.91856	8.28622	6.02916	9.05876	7.94008	7.70887	7.78147	9.16134
A0A369J7F4	3.94251	4.03263	3.58246	4.03103	NA	NA	NA	NA	2.35155	2.52592	2.52431	2.74353
A0A369KBK0	2.9891	4.03949	3.54291	3.21667	2.28873	1.81095	2.67386	3.00728	6.14486	6.1422	5.46273	5.77748
A0A369J5C3	4.42614	4.05586	3.90307	4.31844	2.21744	2.2548	2.69753	3.15803	4.07522	5.06343	4.21014	4.57313
A0A369JK29	4.5126	4.06753	6.38653	4.73005	12.9237	13.212	13.0122	13.7956	3.87733	3.76563	4.24002	4.08485
A0A369J565	4.3268	4.09672	4.11774	4.01436	3.8164	4.15786	4.47359	4.59416	3.79488	4.64086	3.93836	4.37613
A0A369JAL1	3.76653	4.12743	3.73643	4.56901	86.1916	83.1879	84.126	82.424	3.72499	5.6053	3.65383	4.24438
A0A369JUH1	3.80892	4.17375	4.03634	4.15452	1.43927	1.65493	1.65186	1.68068	4.93895	6.6392	5.87422	6.76917
A0A369JS34	4.09113	4.19673	5.00912	4.30769	19.2524	19.6176	21.0894	21.692	4.6309	6.64934	4.23294	6.71995
A0A369JSV5	2.48595	4.19832	3.0702	3.07749	1.55747	1.01926	1.62179	1.52097	2.19286	1.88302	2.41081	2.34814
A0A369K2K8	3.89779	4.22434	4.15558	4.17131	28.5846	27.1805	28.9877	30.825	3.06062	2.57744	2.97738	2.37016
A0A369JGG0	2.53558	4.2488	2.53064	2.61923	8.21125	7.82162	6.62787	6.33613	1.46664	0.994257	0.998756	1.12655
A0A369J537	2.73229	4.26389	3.46923	3.94845	6.37932	5.98638	6.34641	6.70936	1.18248	1.03157	1.2747	1.22744
A0A369K252	4.61957	4.27474	5.69586	4.97393	4.96651	4.28705	4.2916	4.6087	10.755	10.7821	11.4826	11.1624
A0A369K994	4.35151	4.27952	4.082	3.88156	6.14443	6.40435	6.02354	8.08463	2.27007	2.23304	2.25508	2.76571
A0A369J8J9	3.69065	4.27979	4.14181	3.97807	37.587	41.0462	39.9224	41.3215	3.00407	3.17961	2.33733	2.65567
A0A369JJG1	3.34095	4.28467	4.10271	3.05096	6.06255	5.61637	4.83515	6.3953	6.91604	6.54955	5.21589	6.20672
A0A369K151	4.8513	4.28814	4.63519	4.8188	5.36459	4.43467	5.2545	3.38227	12.7861	11.1598	12.7755	12.5086
A0A369J6Z5	5.23765	4.29304	4.10157	7.88709	NA	NA	NA	NA	3.41498	3.70896	3.34599	2.90776
A0A369JZ44	2.89574	4.29667	3.19275	2.34849	NA	NA	NA	NA	5.53881	4.79335	5.23177	4.80764
A0A369JJS5	3.8832	4.30235	2.87554	3.8628	3.9924	3.93511	3.97429	4.74503	1.37779	1.42062	1.32898	1.15048
A0A369JJG7	4.54435	4.32883	4.92029	4.00053	0.405675	0.433114	0.462356	0.999274	0.482394	0.464017	1.42323	0.539532
A0A369JMJ8	2.90992	4.32905	4.13262	3.83035	2.14767	2.31361	2.18255	2.495	3.21495	3.43816	3.69243	3.56897
A0A369JXU0	5.43287	4.3318	3.53789	4.66281	4.37127	4.88295	4.5172	5.14028	2.50898	4.20766	3.13044	4.64666
A0A369K433	2.97774	4.34963	3.75881	4.29631	0.450293	0.647978	0.470015	0.321146	5.52373	5.6935	6.75905	7.20448
A0A369JAC5	3.80906	4.35042	4.20161	4.43671	3.54405	3.3911	3.07488	3.67506	9.64029	10.7008	8.05536	8.00383
A0A369J7A4	3.32438	4.36159	4.24931	3.54151	0.324904	0.277958	0.346261	0.357643	8.01893	8.72541	7.95524	7.29113
A0A369J604	3.92286	4.38009	7.09709	5.64641	4.57993	5.13309	4.91161	5.08377	4.37173	3.15915	3.8422	3.8642
A0A369K2T8	10.6996	4.38145	4.40403	11.3607	3.41066	3.56269	3.53709	4.66684	6.39983	6.34641	7.69991	4.78213
A0A369K1T7	4.68661	4.38503	3.741	4.38639	4.59227	5.27333	4.70637	5.50113	2.15865	2.20558	2.0922	1.92612
A0A369JC75	4.39509	4.40321	4.28736	4.0129	9.26465	9.43608	9.9805	8.3854	4.55968	4.06077	3.61655	3.54982
A0A369JN28	5.22177	4.40683	4.43984	6.00918	4.87391	4.39054	4.59879	4.99998	5.16048	5.68327	6.21004	5.4861
A0A369JHU2	4.77052	4.4254	3.99904	4.37821	11.2124	12.1169	11.4431	12.5068	6.46883	6.58874	6.28465	7.13212
A0A369K1Z7	4.79166	4.42908	4.35135	2.67213	0.236212	0.332239	0.579334	0.44354	7.62118	7.97054	4.59806	5.62685
A0A369JRY3	4.34021	4.44544	3.90448	5.01364	4.16681	3.65648	3.76983	3.31202	7.23013	6.50497	6.98269	7.79747
A0A369JSU9	4.85783	4.46195	4.40275	4.11319	12.6534	12.2293	12.7439	13.1311	3.15921	2.71362	3.02506	3.52782
A0A369K5N3	4.32978	4.47181	4.22149	3.90096	165.651	167.784	171.145	167.303	3.71583	3.74821	3.73034	4.78519
A0A369JK92	4.8968	4.48398	4.39579	5.47313	12.9321	13.8132	13.5602	13.7938	5.33052	5.48406	6.39203	4.41051
A0A369K9K0	3.94076	4.51562	4.66826	5.5989	5.00001	5.05502	5.61907	5.47344	2.06671	1.81604	2.17457	2.01593
A0A369JUQ2	3.7254	4.54377	5.44054	4.84768	63.7317	69.4664	65.4147	69.3834	3.62236	4.22797	4.4019	4.44141
A0A369J817	5.65869	4.55037	4.20395	5.94568	0.122779	0.184993	0.161803	0.168704	9.01184	3.89509	6.93321	8.43911
A0A369J907	4.45411	4.55779	3.9163	3.91925	7.64209	6.63869	6.82144	7.16322	1.67511	1.46105	1.54121	2.04582
A0A369JMR2	4.37364	4.56545	3.84641	4.00746	NA	NA	NA	NA	4.91425	5.93478	4.55001	4.74907
A0A369KCF4	3.21289	4.5724	2.63074	2.96945	0.398347	0.567935	0.600808	0.344488	1.21322	2.03272	2.71878	1.2917
A0A369J0W1	6.61215	4.5821	7.32059	6.03194	0.980439	0.886878	1.00897	1.06152	10.8903	12.4302	9.58923	13.5453
A0A369JBX3	5.27199	4.58482	4.96859	4.58898	14.6542	14.8437	13.8776	13.511	3.25523	3.6253	3.57807	3.26608
A0A369JTT5	4.31334	4.61321	4.41983	3.89848	NA	NA	NA	NA	6.7417	6.61269	6.52373	6.80173
A0A369JAM5	5.80862	4.61681	4.61421	5.35807	3.52872	3.19873	3.46469	3.54161	7.26782	7.46371	6.25763	7.68854
A0A369JS71	4.44315	4.62117	4.42088	3.19303	1.33785	2.06442	1.07041	1.48779	1.87883	1.38259	2.00562	0.372647
A0A369JV15	4.0682	4.6339	4.59789	3.99747	18.2213	18.7095	19.1799	19.0215	3.6521	4.31189	3.3377	3.88092
A0A369KC13	6.68116	4.64375	5.23763	6.68578	10.5886	12.8848	12.6662	12.6595	2.20108	2.58125	2.71036	2.34487
A0A369J1U4	4.67505	4.69078	5.3226	4.70195	8.18517	7.53136	9.32892	8.13895	5.36176	4.88922	5.59233	5.64659
A0A369K1B0	4.69375	4.71194	4.72545	5.0933	1.34955	1.35854	1.23454	1.29651	9.105	9.91203	6.90335	8.08615
A0A369JNX3	4.3578	4.80908	3.13195	4.30579	0.48426	1.26155	4.17664	1.51893	3.73985	5.43241	4.63911	4.8896
A0A369J7A9	4.51877	4.838	5.77336	4.73097	1.52105	1.48631	1.63394	1.69537	18.6085	20.2546	17.3713	18.4927
A0A369K622	4.26374	4.86263	5.79095	6.2673	2.24093	2.50344	2.87989	3.69392	13.9412	15.531	12.5748	15.8194
A0A369JLC1	5.97333	4.87207	5.26357	5.36215	12.1356	12.9224	12.3783	10.3221	14.3208	15.949	5.12861	16.9635
A0A369JZ61	5.42247	4.88275	6.19797	4.54436	10.3917	10.2781	10.2129	9.60702	4.22777	3.95638	3.31443	3.61393
A0A369KB67	4.69113	4.89069	5.19477	5.05288	9.46746	10.7695	14.0832	10.7572	5.42947	6.02444	5.40264	5.30301
A0A369JC01	5.86951	4.91423	3.99442	5.96892	4.69866	4.63977	3.89876	4.47598	12.4826	11.7939	10.8202	12.7451
A0A369KBM5	4.79925	4.92073	5.20796	4.24267	0.640421	0.19261	0.278082	0.0826844	5.17678	5.8359	5.3417	5.8579
A0A369J696	4.64398	4.92618	7.02033	6.30977	11.0664	11.4414	11.1366	11.8995	0.693152	0.279652	0.68866	0.870434
A0A369JY92	4.73609	4.92946	5.07407	5.4221	NA	NA	NA	NA	14.9857	19.3331	12.4692	14.485
A0A369JBM2	3.34888	4.93102	4.56492	5.14456	1.55108	1.39603	1.1816	1.49412	6.60097	6.72794	7.90855	6.89382
A0A369JUF6	3.89754	4.93474	5.12654	4.48796	80.3891	86.8431	84.0535	86.4175	3.29236	3.2243	3.34557	3.3148
A0A369K229	4.23061	4.9429	4.26457	4.31937	10.7609	10.9717	10.7214	10.6242	1.00225	0.874917	0.625765	0.85293
A0A369J7Y4	4.01476	4.95053	4.17892	3.65389	7.0985	6.74008	6.5225	7.35178	3.14775	2.77945	4.18402	3.92389
A0A369K4N7	4.49486	5.02297	5.10814	4.40045	13.6374	17.0297	13.993	15.625	4.89195	4.04225	4.03131	3.91059
A0A369JNE5	5.16011	5.10133	4.40865	5.36408	2.01263	1.86648	1.47797	1.72123	4.79302	5.03725	4.66962	4.88267
A0A369JJ70	4.83413	5.12793	4.97759	4.74007	2.22713	2.45591	2.66454	2.4001	2.95595	3.22923	3.51757	3.35753
A0A369J6Q2	5.30268	5.16089	5.27193	5.32737	4.14159	4.06819	4.15973	4.29951	3.61686	4.37278	5.03182	4.77185
A0A369JWR3	4.96676	5.16497	6.34683	5.04734	14.8134	14.5159	14.8581	15.4973	2.12595	1.72273	2.0236	2.89375
A0A369K297	5.75547	5.18093	4.74574	4.60411	2.32871	2.37415	2.36754	2.45143	2.22262	2.27579	2.62994	2.65885
A0A369KC62	10.7012	5.19995	4.8776	5.46361	3.13077	3.71793	4.26637	3.08793	11.2957	10.9679	23.5596	26.4889
A0A369JRU0	5.71532	5.20787	5.89924	5.74122	3.35164	3.97932	3.95878	4.52838	17.015	17.0941	13.6003	22.8259
A0A369J0H4	5.24734	5.21167	4.30373	5.83297	3.06582	3.57967	3.01038	3.36971	4.60401	4.81601	4.49259	4.75697
A0A369K582	5.14456	5.22349	4.98277	5.44091	10.8021	13.5917	10.0714	10.885	2.73101	2.83713	3.47275	2.70523
A0A369K379	5.42704	5.23008	4.98141	5.71915	11.7143	11.9642	11.4659	11.2649	4.28559	4.10657	3.95375	1.74793
A0A369JFS3	4.47738	5.23703	4.57351	5.21314	1.88842	1.86981	2.02307	2.49809	6.92471	7.18894	6.73931	6.80801
A0A369KGY7	5.02776	5.25746	4.48317	4.93123	0.429235	0.531436	0.699416	0.766974	3.04449	2.90068	2.44001	2.16629
A0A369JSI2	4.87052	5.26954	5.83319	5.08044	1.64964	2.07042	1.71167	1.62068	5.26924	3.80563	4.73964	4.2238
A0A369JTM3	5.43559	5.28781	5.83884	5.62315	9.84541	10.086	9.86423	10.2129	6.41388	5.03803	6.95737	7.31763
A0A369JV85	5.67241	5.32098	4.76317	4.62763	1.60512	1.5678	1.53419	1.85433	3.28547	3.3394	3.51246	3.42273
A0A369JUQ3	5.01893	5.32386	4.63348	5.40138	15.4324	15.495	15.9376	16.315	3.72837	4.07272	3.51346	3.05253
A0A369IXZ6	3.6492	5.32852	5.70889	4.72005	11.9113	11.6461	11.226	10.9308	3.26018	1.29643	1.57451	1.81951
A0A369J7Y5	5.52683	5.34616	6.057	5.05219	0.933602	2.79644	1.13019	1.21693	5.18354	5.76027	6.07464	6.63776
A0A369JZ96	5.29549	5.35428	5.88079	6.85293	10.334	7.87436	7.25776	9.55302	3.94378	4.12491	3.67983	4.0372
A0A369J5I2	5.61098	5.35949	5.06035	5.35333	0.217574	0.177173	0.17983	0.221655	8.64049	8.91998	7.34456	9.53852
A0A369JX94	4.34631	5.37367	4.9831	3.84213	2.2691	3.14839	2.98709	2.35172	13.1082	11.8899	12.5647	12.1012
A0A369JSX5	5.97844	5.37541	7.30061	5.90921	5.05439	4.44696	5.11634	4.36754	2.73933	2.96301	2.50314	2.58802
A0A369K865	4.67182	5.38194	5.32712	5.64532	6.93965	8.50379	7.09514	9.30372	3.86367	3.90474	4.10538	4.33764
A0A369JX72	5.2017	5.38875	6.22928	5.84038	0.568531	0.504966	0.406237	0.23297	7.63777	8.7446	7.27776	8.05378
A0A369K869	5.40387	5.39802	6.2501	5.0135	12.1507	12.4614	13.0969	10.5394	9.25244	6.72654	8.05999	6.26664
A0A369JDR4	4.33135	5.40441	5.46532	5.19139	12.1083	11.1758	11.3876	12.8971	2.31506	2.25441	2.20816	1.66395
A0A369JP73	4.21092	5.4085	4.6819	5.32358	0.527111	0.897605	0.647639	0.66904	1.65591	1.95022	2.01702	2.09102
A0A369JN54	4.99333	5.43988	5.96706	5.60521	6.63486	3.52166	6.19688	3.27277	1.07708	1.15346	1.02884	1.27122
A0A369JNC1	6.44442	5.50584	6.19674	5.90708	12.0292	12.2703	9.62456	11.5662	9.04863	9.58793	8.73263	9.55525
A0A369JND5	6.17092	5.53317	5.30069	5.89767	11.0151	10.4702	9.64265	9.79239	6.73027	6.20396	7.26339	6.86275
A0A369K7I8	4.82604	5.54055	4.59313	5.17755	5.24117	5.24544	5.02051	5.70545	4.91922	5.8926	4.99566	5.33777
A0A369JTK1	5.23877	5.54347	4.9025	5.07262	9.79584	13.3387	11.4288	11.4567	3.06471	4.4686	3.53804	3.25459
A0A369KGZ5	4.90993	5.55641	5.16734	4.15332	2.15926	2.27816	2.21845	2.29498	5.44651	4.90261	5.06044	5.34982
A0A369K6L3	3.88698	5.59759	5.36973	5.43404	0.597576	0.463594	0.349619	0.699066	6.94289	5.99178	7.03933	5.94824
A0A369J7Z8	6.20057	5.60746	5.78286	4.46969	5.62982	5.46448	5.37503	5.68023	13.8949	13.1177	11.5663	13.2899
A0A369J7U1	7.31102	5.61152	4.60031	5.78561	1.85177	1.16767	1.40389	1.81496	22.1994	21.0065	16.8351	19.6387
A0A369K7Y9	4.45061	5.64009	3.73061	5.02369	3.5821	3.90359	4.27196	4.67334	7.54355	8.39167	7.18541	8.12254
A0A369JTH1	4.47162	5.70004	7.78905	8.91485	4.84145	5.70116	4.92241	6.21675	3.58674	4.62968	3.84167	3.88301
A0A369JUI9	5.0379	5.72954	5.6373	5.89785	12.4124	11.6981	12.3864	13.5222	5.08746	4.10865	3.85665	6.1326
A0A369JAB8	5.57437	5.73294	5.07535	5.24351	4.31327	5.64502	3.78985	5.923	0.830021	1.03341	0.704831	0.996223
A0A369JPR2	6.28424	5.7682	6.21284	5.52684	3.78489	3.64768	3.50364	3.49045	3.94785	4.80513	5.15123	4.56506
A0A369JTG8	5.03027	5.77899	6.14229	7.05135	4.62052	4.79376	5.16017	4.5108	3.42038	3.73631	4.16035	4.44196
A0A369JJD2	6.02272	5.80774	5.06874	6.15975	0.468762	0.507588	0.341753	0.447747	2.61983	2.61642	2.5489	2.56034
A0A369JBZ8	6.40578	5.8084	5.09079	5.06448	1.76399	1.48958	1.77865	1.58821	9.70541	8.74055	8.60616	9.11302
A0A369K5K7	5.94276	5.82908	6.06629	5.2321	18.6414	20.034	20.9097	21.3706	14.7515	14.0233	15.8841	14.9548
A0A369JIS9	7.0212	5.86718	6.11107	6.22735	99.5718	105.891	100.982	103.12	4.32155	4.25157	4.68406	4.77575
A0A369JL66	7.16513	5.87828	4.90423	6.49386	26.8043	27.0693	26.3917	27.3822	7.78304	7.32803	5.83139	4.884
A0A369JVG3	4.83373	5.88333	5.7289	4.6272	8.10169	9.16484	7.14451	9.09656	2.93504	2.97457	3.21703	3.36327
A0A369J962	6.44293	5.90347	6.19674	5.36736	0.830901	0.976215	1.07489	0.668528	9.73463	10.4512	9.54744	10.0793
A0A369K6W1	5.51751	5.91151	5.89913	6.63974	7.89558	7.97112	8.01082	7.76291	0.914803	1.16499	1.11641	0.631323
A0A369K5P4	5.64944	5.95399	5.40549	5.42462	10.4524	10.5751	8.73521	10.2261	1.59608	1.59113	1.47143	2.26815
A0A369J801	8.58828	5.97617	1.6951	7.07081	8.94144	9.0214	9.64583	8.66816	3.21019	1.23431	1.49815	2.4562
A0A369JFP4	5.52152	5.98127	5.72877	5.5219	4.17007	3.80132	3.61769	4.40748	11.9261	13.0461	12.2472	11.4651
A0A369J724	7.28848	6.00084	7.69339	6.83332	0.681146	0.699501	0.864359	0.850347	6.87152	5.73412	7.59942	5.90579
A0A369K1R4	6.55721	6.01864	6.0829	6.86359	42.7041	24.3686	25.619	22.5598	2.00447	2.23363	2.25544	1.76844
A0A369K8F2	6.12492	6.04484	5.62928	5.38887	4.80287	3.86389	4.08224	4.4747	3.23717	3.78902	3.86576	4.89075
A0A369JH94	7.21822	6.06046	9.22455	5.5121	18.9828	16.9169	17.0399	17.4852	5.63176	4.83492	4.47545	4.60725
A0A369J6E3	6.4235	6.06944	7.07634	7.0347	19.6289	19.1985	19.1446	18.6787	8.1523	8.34932	8.09536	7.99308
A0A369JHR9	4.89064	6.06953	5.0597	4.60746	19.6777	18.87	19.6572	14.8625	7.59139	7.95014	8.11877	7.60044
A0A369KA18	7.07589	6.07829	6.11092	8.41064	15.7814	14.475	14.6864	14.1458	5.03595	5.98955	5.1742	6.53372
A0A369K6V2	6.63536	6.09254	6.45276	6.60328	1.73441	2.4989	1.6796	2.53171	8.73869	8.85158	8.95538	8.90878
A0A369K2V1	5.26522	6.10414	5.4502	5.88082	6.0826	8.65724	7.56582	8.80229	3.6124	4.08677	3.47414	3.57186
A0A369JM86	6.12394	6.12111	6.12441	6.12813	3.84445	4.82056	4.42187	4.28671	7.20949	8.23132	7.65857	7.38177
A0A369J1E2	5.94038	6.17745	5.42836	5.55825	7.85607	6.92229	7.39405	8.46197	0.344683	0.903728	0.30466	0.554138
A0A369K1E8	5.6898	6.18866	6.26781	5.20096	17.3237	17.0906	18.6245	20.5711	8.57005	9.44956	9.40199	9.71735
A0A369JI40	6.41126	6.19471	5.48356	5.56477	18.5388	17.8436	16.4394	18.5203	8.73832	8.63392	10.1252	11.234
A0A369JGD6	5.54156	6.21116	7.56425	6.21718	1.33758	1.00805	1.09202	1.56024	4.8405	3.94904	4.71026	3.48512
A0A369JGA3	5.29392	6.25134	5.68318	5.18137	58.5447	56.9137	59.1954	58.8915	1.26205	1.91232	1.22864	1.85041
A0A369JWW5	6.02103	6.26226	6.40144	5.52986	1.80667	2.43395	3.22515	2.37208	10.2771	30.3166	10.5782	10.4026
A0A369K8N2	4.56306	6.26993	6.79057	4.35896	8.1836	10.4852	9.1441	8.80054	4.87153	4.71048	6.21107	4.07443
A0A369K4Q2	5.88583	6.33771	4.5298	5.75057	8.88345	10.2364	9.3658	9.83971	5.6101	5.90208	6.10176	5.27336
A0A369JGM9	5.4339	6.36081	5.32279	4.81363	10	17.0085	8.8653	16.2112	1.52302	2.30399	2.33654	2.4625
A0A369JAK9	5.06868	6.3735	5.6224	6.11704	0.921941	1.18141	0.91706	1.13523	3.91575	3.51307	4.64537	4.39053
A0A369JB43	6.41173	6.38225	6.50313	5.41337	5.87731	6.46258	6.41498	6.67085	3.16722	2.74485	2.99201	2.64018
A0A369JAD7	6.2291	6.47218	7.06985	6.75624	7.05778	8.49426	7.47394	7.53936	7.52424	6.46858	6.8002	6.25776
A0A369K5R4	6.35293	6.49328	6.78676	5.51643	3.7415	3.28744	4.16377	3.64009	9.47818	9.81771	11.6784	10.9575
A0A369JCQ7	6.5627	6.51647	5.7454	5.82653	0.217891	0.154153	0.379526	0.159365	15.6339	17.6336	15.234	16.0601
A0A369JID4	7.65332	6.5335	7.14632	7.40369	10.9507	11.0579	11.493	10.7386	5.88507	5.81431	5.41051	5.21475
A0A369JQ94	6.03455	6.53988	5.86282	6.65721	2.84055	3.06971	2.50113	3.01403	4.034	3.32488	4.01723	3.69351
A0A369JT19	5.79514	6.59166	5.54911	7.22284	4.72904	4.99201	4.71951	4.73899	3.52725	3.84092	3.30508	3.57269
A0A369JI38	6.20276	6.60949	7.23068	8.07287	130.604	116.706	125.132	126.552	12.6698	12.0459	12.3091	16.1382
A0A369K1C5	7.32122	6.63048	6.10353	6.02758	NA	NA	NA	NA	10.6057	10.7525	17.1893	13.751
A0A369K4S1	6.1285	6.64968	3.80643	6.3806	1.9255	1.46942	1.31735	1.16275	12.0519	13.4219	13.4763	14.4308
A0A369K639	5.49192	6.67048	6.41561	5.99307	1.07294	1.00118	1.1858	1.47658	5.71076	6.4847	7.15955	6.76359
A0A369JA35	6.99363	6.67182	6.02044	5.78653	0.916245	0.989468	0.417846	0.550006	8.5774	8.50975	8.69567	10.2326
A0A369JI63	6.37066	6.67428	6.52647	6.1404	2.11925	1.83442	1.79689	1.95186	5.45423	5.23498	4.53461	4.97535
A0A369K912	6.81117	6.6973	5.56031	6.08896	4.39361	4.03445	4.74505	5.33346	1.81191	2.44993	1.79759	2.00566
A0A369JFP3	5.78786	6.71192	8.16843	6.4256	1.67586	1.76403	1.60545	1.72723	8.37543	7.02927	6.86325	6.04894
A0A369JD40	11.6376	6.72852	7.06599	11.1924	18.318	15.3679	15.066	18.6654	18.3843	20.3222	15.0948	15.8543
A0A369JPH0	5.77023	6.75187	4.69336	5.53124	27.6363	27.2991	28.0773	28.9986	4.61911	5.21467	4.22976	3.99888
A0A369K434	6.81772	6.76164	5.92179	6.35527	21.8523	23.6565	23.2459	22.2893	8.76311	8.84759	10.7003	8.33508
A0A369JW47	6.82237	6.77286	6.91595	8.36237	8.11225	8.13661	8.85741	8.91577	4.8998	5.28403	4.68658	6.42171
A0A369JG67	7.23958	6.78171	7.53602	6.48617	1.25443	1.16975	0.963993	1.25709	9.33507	8.96439	9.28037	8.75361
A0A369JSC8	6.4642	6.79276	6.95221	8.70804	25.4922	25.0277	24.5764	26.0185	11.4297	13.1151	12.6619	11.7503
A0A369JS89	6.55752	6.80021	8.36802	7.61915	14.5561	16.6412	15.545	16.6281	5.76362	7.25161	6.15872	7.26638
A0A369JIG9	7.70891	6.86896	8.27008	7.68036	1.49057	1.94696	2.06442	1.87365	6.51542	9.33881	7.51275	6.92431
A0A369K6V9	5.6523	6.89922	6.04846	5.69388	2.81448	2.73933	3.00124	2.88521	2.03199	2.12516	3.11541	3.02888
A0A369JJD0	6.75944	6.94346	6.88325	5.86193	0.873571	0.541561	0.997384	0.97063	6.23393	5.9719	6.93606	7.02998
A0A369JP37	6.67763	6.95804	6.86724	5.19879	21.1642	20.3904	21.2961	21.2553	7.82203	8.75116	7.70955	8.58111
A0A369J5B3	8.4294	6.96502	7.35646	7.09139	14.9933	15.9869	15.2387	16.2731	9.16039	8.17743	9.08393	6.15639
A0A369JZ73	6.83217	7.01535	7.55399	5.71658	3.75705	4.44659	3.17019	4.95315	NA	NA	NA	NA
A0A369JF33	6.98743	7.12546	7.13426	6.41427	1.31845	1.45431	1.35318	1.31433	13.4953	12.3664	14.848	12.9432
A0A369JH98	7.37461	7.16497	5.95785	6.95164	0.701574	0.835178	0.889545	0.962504	6.83803	8.36923	7.11076	8.09479
A0A369K6A6	7.14057	7.18544	5.49901	4.7379	0.534241	0.794545	0.832261	0.829941	4.82545	5.66375	5.40053	4.94871
A0A369JVN4	5.5015	7.2011	4.58583	5.07068	2.51383	3.1926	3.25942	3.51285	9.21841	8.42548	6.03401	6.62512
A0A369K887	5.74736	7.20982	6.0194	6.66812	5.8031	5.77482	6.61293	7.1549	1.72008	1.96144	1.76117	1.2519
A0A369J9T0	12.5862	7.29216	11.4493	13.6354	9.8013	9.80545	10.0054	10.2251	22.498	25.9506	29.3419	27.9593
A0A369JVK2	8.25976	7.30497	12.2664	12.1841	9.71361	10.3636	8.11135	9.69331	9.04583	8.61648	9.36285	9.324
A0A369JKI2	4.88587	7.31105	8.14767	8.41835	20.9183	22.1434	21.8948	22.5008	8.20979	12.0441	10.2921	7.48975
A0A369JQP3	7.50478	7.31799	6.95527	8.19725	5.5333	5.17548	5.23221	4.92929	5.67154	4.85363	6.93864	4.92013
A0A369JFC8	5.23647	7.36503	4.97546	6.53235	6.97041	6.0846	6.24418	5.68823	3.78906	5.46862	4.3911	3.89225
A0A369K201	6.44771	7.37898	7.66373	7.44719	17.2868	17.4473	19.1713	17.2955	7.49153	9.70344	10.8934	10.0931
A0A369KA25	7.1217	7.39094	6.19782	6.84705	1.18569	0.741746	0.890982	1.071	8.69986	8.37213	8.64157	10.1262
A0A369JM95	6.67663	7.41573	7.4475	7.04068	1.20688	0.96713	1.20248	0.913297	0.479641	0.882862	0.878297	0.931168
A0A369K2H4	6.64501	7.43208	5.2676	6.96513	7.36782	8.12807	6.74528	6.40596	0.820067	1.61051	4.09951	0.912061
A0A369KFB3	6.6142	7.45894	5.9416	5.77914	6.62068	7.21115	7.46763	7.04583	4.44242	4.89162	3.81794	4.27202
A0A369JNX8	7.23395	7.49412	9.25403	7.67529	4.29014	4.10318	4.25278	4.04937	7.6568	7.13186	6.52968	6.8378
A0A369KB97	7.27854	7.50224	4.44167	7.73623	1.58561	1.70016	1.71743	1.69574	9.04331	7.2608	9.26046	9.57997
A0A369JA05	7.2894	7.51359	8.45324	7.67591	19.7603	20.4039	20.6442	20.5881	8.62473	6.69735	8.18415	7.17153
A0A369K7G7	6.85452	7.59266	7.48373	6.71511	4.48823	4.61997	3.99341	4.22758	6.78826	6.16121	5.56216	7.12124
A0A369JT05	7.39391	7.60211	6.96256	7.80579	26.9089	22.5246	26.0334	23.6941	4.10175	4.63976	4.00856	4.35633
A0A369JKN3	8.13843	7.60322	8.00208	6.65264	15.5762	15.5427	16.6467	17.6803	10.4917	11.7462	10.8261	8.56919
A0A369JIW7	7.8378	7.61053	7.48063	7.47246	6.38892	7.50828	8.31613	7.06038	7.65357	7.9993	7.75304	7.77701
A0A369K6G3	7.79385	7.61663	6.69163	7.9523	1.35931	0.968154	1.42792	1.22566	31.7078	29.5014	29.1458	33.159
A0A369JPY7	6.14498	7.64421	7.25627	8.8099	3.08429	4.18802	3.39698	4.26303	10.0956	10.1865	11.0021	12.3767
A0A369JJ82	6.60716	7.72242	7.73371	7.32984	7.65723	7.65615	8.58555	9.26052	10.0032	9.09399	8.97017	10.4805
A0A369JJF8	8.79767	7.77636	6.81857	6.53743	3.56759	3.35412	3.83071	3.69499	5.80621	5.31389	5.9192	3.52598
A0A369JL46	8.16312	7.79888	10.9857	9.48357	6.74819	6.09051	5.71039	5.18409	9.53775	8.9766	8.15993	11.542
A0A369J5N3	8.00814	7.84857	9.20843	8.12839	2.54603	3.38147	2.52606	2.83122	15.0401	15.0063	13.4412	12.6158
A0A369JAD6	7.66128	7.95375	8.06506	8.33237	3.97175	5.01251	4.53068	4.74912	10.7249	11.0779	11.3395	13.9277
A0A369JWE2	7.16425	7.95787	10.6969	9.75676	12.2779	16.4362	15.2257	13.2728	11.5135	11.6584	12.4196	13.9415
A0A369K0G7	6.61982	7.96998	7.34952	9.404	3.50022	3.04023	2.4404	2.88545	13.2927	13.019	13.5135	13.1781
A0A369JML8	7.78728	7.98233	7.45608	8.91096	3.19197	3.15199	3.5565	4.4418	11.8469	10.8215	12.0526	11.8546
A0A369K136	8.57281	7.98827	9.48033	7.07733	4.03934	4.02875	4.24603	4.25264	9.99139	9.72094	8.92951	9.79893
A0A369J0I9	9.25195	8.01811	8.76973	9.82027	3.83381	3.55711	5.56799	3.31572	3.95747	4.30653	3.7398	4.67587
A0A369JWU9	8.05182	8.01912	8.37802	8.42432	25.5236	24.3217	24.2832	24.1659	3.47638	3.55479	3.11579	3.64589
A0A369JQW7	7.24094	8.02686	6.72535	7.65637	4.07123	3.65824	3.66614	3.57926	8.80741	8.75871	8.64279	9.01963
A0A369KDK0	9.57823	8.10814	10.6049	9.75187	9.54464	9.19449	8.97291	6.91302	13.7102	14.7733	13.1081	11.479
A0A369K1H0	7.33011	8.19866	4.85941	6.24391	3.90132	3.85509	4.35188	4.16403	3.68604	3.25534	2.10495	3.70925
A0A369K9N8	8.01755	8.36213	8.65315	8.13944	5.54302	4.83261	5.77222	4.87371	5.14035	7.25851	6.12078	6.30753
A0A369KF41	8.11387	8.42893	8.12492	6.48506	16.9666	16.4826	16.6188	15.9997	6.99036	7.73666	5.23183	6.36905
A0A369K0M8	7.78156	8.49426	8.24837	8.35934	2.58052	2.5304	3.30848	3.56965	4.15186	4.32635	4.53732	4.59487
A0A369K2Q9	8.51992	8.5158	9.85152	8.36598	13.0663	13.1092	14.9025	13.845	21.7756	22.545	26.1833	19.3283
A0A369KG27	9.03917	8.56235	8.9099	9.23175	9.27915	6.62496	7.38668	6.94345	10.4159	11.3624	10.0918	10.2853
A0A369K7G8	7.91087	8.60698	8.5161	8.04245	0.474635	0.746262	0.536008	0.722363	3.86703	4.61713	4.24642	4.18943
A0A369J8P1	8.4277	8.61526	8.09272	8.41921	4.26684	3.53504	3.73337	3.55242	9.25637	10.2678	10.1529	11.6699
A0A369JGM4	7.97805	8.65099	9.52956	8.82928	1.1256	1.85389	2.8467	2.50897	11.2176	10.1073	9.15874	10.9432
A0A369K7P4	10.4265	8.75213	9.51434	8.4551	7.79209	10.2406	9.39609	10.0925	13.4564	13.308	12.7577	13.0635
A0A369JKT7	8.53826	8.88864	9.01651	8.0504	NA	NA	NA	NA	8.62334	6.74052	7.57617	7.95279
A0A369K155	7.88913	8.97888	6.95538	9.45133	0.095377	0.106125	0.117931	0.124881	2.81612	2.65028	2.62729	2.76592
A0A369K1D6	9.45126	8.99691	10.4254	9.64319	9.38006	8.56268	9.28515	8.70349	12.9625	12.3828	11.3534	11.6313
A0A369JLC5	9.64518	9.01211	10.5183	10.0236	1.54257	1.3051	1.47316	0.801392	16.9927	13.3072	12.88	12.4714
A0A369K4B5	8.54424	9.36261	8.34626	8.66786	0.619013	0.639732	0.549948	0.580222	8.75747	9.32394	7.48958	7.93216
A0A369J7H3	7.21035	9.37666	9.36829	6.66513	15.7907	15.6291	17.7189	17.0146	4.26661	5.80682	4.12134	4.87407
A0A369JVF7	11.2347	9.43913	9.98259	10.6102	14.9296	13.9021	12.4556	12.7281	8.35218	7.84153	7.46	8.23962
A0A369J531	8.8293	9.44558	9.85214	8.83852	11.0502	11.0168	10.2691	9.25029	8.02931	9.93894	8.06174	7.42145
A0A369K4Y3	8.89588	9.4568	10.85	10.0876	45.5738	47.4029	53.6147	54.6305	8.49311	8.18295	7.72835	8.59377
A0A369K927	8.35514	9.51148	6.88642	7.68084	7.02526	8.32873	5.14672	4.72419	2.15546	2.25851	2.39795	1.92385
A0A369JQJ2	9.36235	9.57261	10.3781	10.0982	10.8666	11.8481	10.697	11.4762	26.0933	32.2572	24.2815	21.2966
A0A369JPG5	6.48474	9.58369	6.77888	7.2021	16.1102	16.9928	13.8182	16.0926	6.93233	6.76559	5.74818	6.26442
A0A369J828	9.30484	9.68677	10.3346	8.8546	16.8058	16.2005	18.7253	19.1949	18.9041	18.4885	18.3036	17.7358
A0A369JWN9	8.68781	9.71428	8.74449	12.2945	19.0329	15.9204	18.1047	15.1098	6.75833	7.21509	8.19966	9.89262
A0A369KBZ6	9.57226	9.7484	8.12297	9.04319	0.172281	0.107764	0.097168	0.0947434	10.0677	9.96541	7.2177	10.2509
A0A369JF66	10.0593	9.78141	9.35655	10.4078	5.20436	5.74728	5.79132	4.97347	7.80313	7.49066	11.2458	7.83252
A0A369J7S7	10.3371	9.8607	8.80427	8.97113	22.999	24.938	24.5344	26.6528	6.37857	6.18178	6.93473	6.99018
A0A369K7Q6	10.8408	9.87488	10.3183	8.82973	0.637725	0.816912	0.613469	0.239604	10.3288	9.85862	9.62002	10.0567
A0A369K188	8.01396	9.88865	7.83897	9.52342	10.762	10.7569	10.7448	10.5235	5.46961	6.58263	6.40145	7.14914
A0A369K8R3	9.1071	9.90543	8.88272	10.4401	11.4257	12.3241	10.523	12.8731	6.69704	7.34742	7.31825	7.42681
A0A369K6J3	8.31196	10.0476	5.83656	9.19164	4.80984	5.37823	4.95459	5.40425	6.43989	7.20721	6.16109	5.10236
A0A369JSR8	8.51886	10.0731	9.39791	9.87856	18.0422	18.9422	17.9774	18.8302	10.3074	10.4578	11.0766	8.94702
A0A369KIQ6	7.51958	10.1066	5.5258	6.11675	4.78859	3.57134	4.03127	2.83097	3.02349	3.82889	3.29752	2.08046
A0A369JH95	9.66219	10.1107	9.42456	8.70999	21.6801	22.749	22.9632	21.6931	13.2017	12.2179	13.0649	12.7696
A0A369JCZ7	8.61472	10.1251	11.1419	11.8645	69.9837	69.5355	69.2003	70.0277	8.05182	7.08017	6.64606	5.85007
A0A369JBW1	10.0271	10.1709	10.1455	9.02454	61.7231	66.3695	61.14	66.5333	3.48327	3.38298	3.25927	3.35362
A0A369K4E6	10.6387	10.1852	11.4155	9.43884	13.3646	14.203	13.3326	13.1001	15.1678	13.3395	15.1506	12.6957
A0A369JLL0	12.0064	10.207	9.48284	8.98418	2.39677	2.30968	1.79777	2.72847	32.2226	35.6921	35.8862	34.982
A0A369JPQ5	9.94863	10.2203	8.72679	10.6181	18.5984	21.0031	18.1374	20.0424	2.87671	3.03716	2.70396	3.11408
A0A369JM39	10.2257	10.2311	11.0921	8.2356	2.64466	2.62333	3.31545	3.78664	15.2943	19.0391	18.2367	17.9774
A0A369JV54	8.56269	10.265	9.29159	9.153	5.51241	3.83774	5.98358	5.42787	7.34262	7.76831	7.75251	7.38296
A0A369JKU2	7.84452	10.3034	6.17647	9.51355	15.2279	15.5344	12.6479	15.3506	11.262	11.4165	14.0594	12.5457
A0A369JAG2	10.1063	10.3838	10.2195	11.8909	3.89658	3.43004	3.46522	2.69165	19.4078	17.8462	17.8265	22.5102
A0A369JTU5	9.82827	10.4254	10.8799	10.5248	2.33603	3.59009	2.47196	2.99882	12.1982	13.5167	11.2959	12.7859
A0A369J9R1	10.1413	10.4597	8.01012	9.86295	12.8225	13.5958	13.276	14.5664	11.5372	10.8167	9.32779	11.542
A0A369JPJ9	10.9988	10.5246	8.96725	8.08078	18.8209	21.2538	17.9277	22.8677	6.7643	7.2803	6.81525	6.27338
A0A369JS90	10.9126	10.5526	9.17606	9.47984	4.52421	4.28513	4.10815	4.28296	27.9472	27.6989	25.4063	23.3677
A0A369JGV5	11.3381	10.6839	10.1208	11.7441	18.3095	18.6371	17.8999	18.5785	11.5763	10.8534	10.3734	13.0247
A0A369J7P8	8.6812	10.6941	9.52358	9.69863	4.8929	4.70881	5.05597	4.26782	13.675	14.799	13.6953	13.4667
A0A369JK98	9.39289	10.799	9.97146	8.8159	2.34008	2.21489	1.78685	1.48376	9.66267	11.3889	10.749	12.0334
A0A369JN93	10.1175	10.8853	10.6758	10.597	4.019	3.87254	3.88256	4.43893	18.9977	17.0473	18.3954	16.5576
A0A369JI11	11.8818	10.9323	9.83968	8.84951	NA	NA	NA	NA	3.37829	3.77189	3.50376	3.65831
A0A369K6D0	9.8882	10.9536	9.95313	11.8131	3.3219	2.23668	2.93994	3.03717	20.4947	20.8451	18.3645	19.638
A0A369JA69	9.38197	11.0042	9.77647	10.2615	3.27102	3.29887	4.04755	3.60559	11.8469	13.0792	10.6409	13.2317
A0A369JXN1	10.1874	11.049	9.79653	9.79863	6.12117	7.20287	5.51648	6.71773	8.64885	8.61393	8.86923	8.41827
A0A369K203	11.2518	11.1838	11.7215	13.1496	27.6101	26.5577	27.6797	28.8559	15.9492	16.5477	17.3443	17.1705
A0A369K827	12.1149	11.2727	11.5179	9.69684	3.30484	2.7004	3.55149	3.71709	13.9892	13.448	24.3812	18.8289
A0A369K354	11.2077	11.31	13.4292	12.908	3.73554	3.63152	3.6304	4.78092	22.3751	22.7501	18.3222	21.1417
A0A369JTF8	10.8954	11.357	12.4466	11.1473	22.3808	19.59	19.2278	20.4717	6.80404	7.06404	5.52618	6.87479
A0A369JYX9	11.3915	11.4548	10.3304	10.7764	21.0654	18.8061	19.1951	20.2678	10.444	12.0378	10.7515	11.6256
A0A369K5Q5	9.09957	11.5637	8.69462	9.36011	19.9956	21.9999	21.158	22.4395	14.3879	17.0092	14.5023	15.1836
A0A369JQG1	10.1858	11.6065	8.7241	9.834	15.0757	13.9633	13.6979	14.5896	6.79054	6.55202	7.66484	9.50046
A0A369JAJ0	9.99467	11.6954	10.2686	10.8184	2.20174	2.70307	2.27079	2.31442	12.8269	14.4736	11.7986	12.3232
A0A369JG99	12.7185	11.722	10.7914	10.7176	16.8435	13.3431	16.3307	17.0965	7.15303	7.16648	7.84397	7.06064
A0A369JKD9	12.8866	11.7403	12.9445	12.2967	32.0135	32.2026	31.6345	32.4576	9.37308	9.72061	9.20292	9.26666
A0A369KG83	9.71592	11.8167	9.13933	9.19021	0.269809	0.484675	0.343988	0.278965	11.059	11.7485	5.19235	14.1158
A0A369J790	12.1279	11.8642	12.5137	11.9175	0.877927	1.18913	1.24988	0.909344	23.146	21.8186	20.3874	23.2822
A0A369J4Q8	12.3693	11.8863	13.307	12.4417	16.8128	17.729	14.1391	15.5098	9.22949	8.90304	8.36951	9.79786
A0A369KBX4	11.9609	12.2038	10.9751	12.1253	14.9114	16.1456	13.0432	17.929	6.69414	7.21768	5.00888	8.06983
A0A369KBZ4	12.3581	12.229	12.0811	12.5652	24.4729	25.3923	24.9789	25.5792	13.1221	13.7654	11.6277	13.5494
A0A369JN29	11.0013	12.2653	10.8654	12.9337	4.08951	4.06341	4.10929	3.39735	15.7015	16.4361	14.9866	15.0294
A0A369JGL2	9.05208	12.3087	9.26289	7.67397	19.8595	24.5762	21.0736	24.6585	3.67297	3.12485	4.04513	4.16297
A0A369JWV0	10.0288	12.3293	12.3315	11.7166	5.01719	4.12618	5.73658	4.85175	12.2336	11.6803	11.5764	11.0542
A0A369K6M4	11.9894	12.3881	15.0889	14.1866	4.21769	5.46803	5.4992	5.4522	18.6419	20.542	19.3293	16.9543
A0A369JRZ2	6.67163	12.4177	5.69698	5.55891	0.0845738	0.120866	0.172797	0.333696	8.2082	8.86612	9.47643	8.11277
A0A369JMD8	12.2962	12.5266	13.1165	11.5166	0.444749	0.642425	0.386392	0.91782	13.6887	13.2417	17.1614	14.0043
A0A369K2S9	8.20806	12.5369	13.9024	12.2147	7.56781	6.20762	7.92089	7.57984	24.527	20.6931	24.3273	22.867
A0A369JP99	13.4742	12.6797	11.6933	11.6739	11.3239	14.2234	11.3711	14.6163	20.2075	17.1476	18.2165	20.9697
A0A369JWV1	13.5982	12.6832	13.6612	16.4136	3.51872	2.93727	3.45193	3.6293	6.70144	7.81572	8.62338	6.25596
A0A369JLA1	9.87839	12.7277	11.4634	13.4606	0.85696	0.861856	1.04531	0.962397	13.0279	13.8419	15.5738	17.6749
A0A369JXD5	13.9842	12.7395	13.9447	11.0905	10.0858	10.4624	12.5772	12.0922	9.29233	9.8741	11.5949	9.79192
A0A369J5D5	11.7885	12.7981	8.80412	7.07103	36.7142	31.0059	56.5102	35.1815	0.938456	1.03594	0.901247	1.42441
A0A369JGP6	10.3347	12.9149	9.77283	12.4724	12.8566	12.8724	12.1578	11.9682	30.5655	35.2662	30.17	28.5722
A0A369JY10	12.7473	12.9699	13.8645	12.8805	7.16143	8.23894	6.16476	6.06237	1.71694	2.2039	2.656	3.42781
A0A369K7J9	11.5571	13.0441	13.6141	12.6084	12.6926	11.9179	13.384	14.3527	7.87541	8.77954	7.42835	14.4047
A0A369K2C9	11.7225	13.1394	8.47336	15.8718	4.59241	4.56511	4.31325	4.51733	13.1819	14.8983	12.6371	13.4757
A0A369KCP8	12.1604	13.1605	12.5736	10.0975	11.9269	4.90703	11.6068	5.48646	11.4857	14.4723	13.3341	11.8899
A0A369JQ39	16.2337	13.2203	11.0049	14.2804	14.8659	16.019	14.9171	14.4018	13.9809	16.4111	14.0368	13.9678
A0A369JBU0	13.1181	13.3961	11.2801	10.8204	19.7228	17.6561	17.4373	18.3525	15.7806	16.1256	22.4126	16.9878
A0A369JRU4	15.7295	13.4619	15.5985	14.2256	10.1547	11.2823	9.65571	10.1374	18.9784	15.0256	15.4846	19.7854
A0A369JME9	11.2474	13.4727	11.982	7.12248	11.304	13.4363	13.5339	13.7532	7.2089	7.64119	8.94007	7.97846
A0A369JNP1	15.3907	13.4784	16.0001	15.047	15.2602	14.9727	13.1387	13.7821	13.5531	12.3632	11.482	15.6037
A0A369J8H2	14.0176	13.491	12.9006	14.0788	36.2857	37.5561	33.9074	39.6426	4.1899	3.9898	3.86895	4.58628
A0A369JTV5	11.5192	13.5263	10.4313	11.2547	3.27165	3.16424	3.05702	3.6096	11.469	11.0873	12.2382	10.8169
A0A369J9Y1	15.2828	13.6059	15.0604	14.3888	132.364	131.061	136.161	136.403	7.55126	7.48379	6.19937	8.11865
A0A369JM85	14.6792	13.7293	13.6497	12.6173	1.39172	1.14571	1.86575	1.93125	36.3286	37.7486	22.1785	22.319
A0A369J8Y1	13.2996	13.7945	15.0921	14.2838	79.3516	77.2139	74.0329	77.3625	10.6918	10.7554	10.2805	8.87687
A0A369J1T6	13.3542	13.8117	14.1568	16.8437	20.0513	20.4967	20.1126	19.8605	10.9959	11.4304	13.1945	11.0072
A0A369JKN9	13.993	13.8693	10.551	8.86439	2.54748	2.27021	3.13835	1.95294	32.6541	30.5865	27.1175	31.2274
A0A369K670	9.5132	13.9593	11.0217	11.943	6.41467	5.87265	5.98709	6.11588	17.4329	17.844	15.0454	14.0826
A0A369JZT9	13.3413	13.9619	15.2356	13.6919	14.4285	16.2763	15.1892	15.5855	8.35412	10.3489	9.35596	11.9895
A0A369JUS3	10.8328	14.057	9.85553	10.7413	5.37844	5.70651	4.46318	5.25791	12.8548	16.1138	16.5776	18.9682
A0A369J9E5	13.7738	14.1979	13.4078	13.6756	42.8056	54.7231	51.7573	60.615	14.9806	15.2131	13.6697	17.3232
A0A369JYS8	15.7355	14.3358	12.5446	15.8151	73.9631	86.8886	78.1234	94.2455	1.50598	2.18728	1.93328	1.55743
A0A369K3F1	15.2224	14.4249	13.0466	16.5714	25.1096	24.4784	25.013	23.4392	13.1876	14.5112	16.3477	17.8496
A0A369JNZ8	15.5738	14.5419	14.1487	17.4126	8.17754	7.6974	7.31113	7.84397	4.28221	3.55589	4.04789	4.02592
A0A369JDL9	13.3097	14.6405	14.9559	19.9385	0.256621	0.58424	0.402451	0.405741	2.33999	2.50846	2.66687	2.2557
A0A369K1B1	16.0607	14.9518	14.4197	13.5384	12.3364	13.6662	13.5679	12.224	8.56424	11.1136	9.75278	10.1695
A0A369J739	15.9248	15.0458	15.0114	15.0136	NA	NA	NA	NA	11.3709	13.0998	10.9519	11.3012
A0A369J8L8	13.1519	15.1231	15.7358	17.0384	25.7479	23.1023	25.7544	25.107	20.6999	14.9938	17.4682	15.4134
A0A369JI07	14.7761	15.3828	14.275	13.6083	27.4972	27.2156	28.3081	29.7817	20.9522	20.1319	16.7363	18.2159
A0A369K6E9	14.0963	15.5986	13.9926	16.6167	5.32188	5.71077	5.41406	5.06467	9.47657	8.69538	7.41032	6.01356
A0A369JZD0	15.2595	15.8094	14.9772	14.0823	7.14499	7.1412	7.73944	7.63393	25.4438	16.0269	22.6075	23.1872
A0A369J591	15.1002	15.8669	15.7728	15.953	13.1696	16.4641	15.1106	16.7397	15.7483	17.369	16.54	17.6748
A0A369K0K8	16.2749	15.9414	13.2425	15.4514	8.69658	8.84859	5.90049	8.09164	15.5278	17.194	14.968	15.4584
A0A369JR54	16.6042	16.3817	13.9603	16.6044	5.87418	4.76535	3.34118	7.01055	8.68971	8.47301	12.4103	8.6999
A0A369JM94	17.054	16.5783	14.4105	18.1068	9.0081	8.79449	9.10824	8.68717	15.8298	15.1502	19.7233	16.7851
A0A369JVP3	16.7771	16.6186	19.2708	17.0481	9.69709	10.3442	8.21258	9.71752	15.7515	17.2805	10.8989	13.1674
A0A369JSC7	19.39	16.6373	12.356	15.7934	3.56465	3.54198	3.59988	3.69159	12.6325	15.7428	14.3316	11.0717
A0A369K7B0	17.0266	16.7934	13.327	19.3611	230.511	227.844	218.442	222.562	12.3473	13.7487	9.40925	12.7803
A0A369K3S0	17.7439	16.8456	13.7203	13.1378	26.2983	24.8783	26.1888	28.3067	30.8535	32.1496	30.5037	27.3438
A0A369K5L4	15.7281	16.9203	17.8555	15.3625	11.9828	10.95	12.6479	12.9277	14.022	14.9832	16.3933	12.3882
A0A369JMV8	17.255	17.362	17.1261	17.6176	20.7347	21.3871	22.8549	22.0098	21.1262	22.28	20.6931	23.2545
A0A369K703	16.4095	17.3823	15.9215	18.1999	180.03	193.433	195.779	185.988	4.62145	5.67344	4.9675	4.56819
A0A369JNU7	17.2017	17.3933	18.9807	15.2886	18.8229	20.5647	18.8305	22.3941	9.35303	9.90484	9.55455	11.014
A0A369KHD3	16.0585	17.4418	14.2894	19.982	4.45072	4.63556	4.94219	4.3823	14.2239	13.9542	13.8086	12.8373
A0A369KAT5	15.7324	17.6223	17.8794	17.4737	7.05362	7.09274	7.30512	7.39017	16.8537	19.5131	22.7213	26.4121
A0A369K8Z0	14.8423	17.9232	15.1966	15.5082	5.92707	6.97472	4.80835	8.17793	18.1461	18.0613	16.8395	19.8688
A0A369J245	18.6316	17.9502	17.8634	16.4222	67.2659	64.912	62.6794	70.0929	24.002	25.3389	26.6156	27.5069
A0A369JBD4	18.2334	18.2368	20.2631	17.5989	0.38691	0.63022	0.303045	0.690662	26.4969	28.3072	27.1443	27.2912
A0A369K0J1	19.963	18.5369	20.3056	17.0117	0.22015	0.269917	0.21978	0.222131	18.992	17.229	23.2822	12.2426
A0A369J8R8	19.4543	18.7718	15.5807	17.95	67.0142	78.1435	67.1302	76.637	11.3412	12.5967	12.0647	13.4739
A0A369JNB1	15.7517	18.8292	16.3162	12.2992	20.3315	19.9549	18.3136	20.1577	15.7654	17.5743	15.735	17.0675
A0A369J914	18.9966	18.8422	17.783	17.2495	7.04099	8.4254	9.43298	9.84513	7.06365	3.25467	6.13298	8.73039
A0A369JGF8	19.292	18.9411	23.42	15.1914	43.0833	42.5135	41.7527	42.2393	8.67186	8.31975	9.11547	9.11523
A0A369JVZ2	17.0197	19.1655	19.6981	18.3636	6.09029	5.99154	6.65125	6.28917	32.6941	26.3123	30.1901	33.7695
A0A369JHC7	18.9915	19.5585	17.9587	16.6236	21.766	23.8411	21.2115	22.8667	6.5444	5.84021	5.58862	6.23583
A0A369JUZ7	17.7782	19.8184	17.111	14.1035	29.2957	29.8445	29.6586	30.2566	9.12658	9.97945	9.29852	10.1515
A0A369JI09	20.423	19.9827	20.9263	19.5834	23.6587	23.6633	21.9044	21.8741	21.0669	21.7297	21.0662	22.0884
A0A369JFE5	18.2162	19.9856	17.7341	18.7894	9.9233	10.7697	10.1349	10.8661	20.8055	21.605	18.371	23.1795
A0A369J654	19.9273	20.0679	16.5706	21.5877	2.6601	2.91913	3.18362	2.86577	10.4886	10.9113	10.3875	10.9609
A0A369JPK0	21.3311	20.5516	17.8311	20.6156	14.7848	14.5442	15.4224	13.4171	38.8634	37.7122	33.5902	34.4884
A0A369K811	19.3733	20.6782	18.8563	20.2687	0.0952112	0.102701	0.0792894	0.0855185	14.989	16.6071	15.169	17.7055
A0A369JSM1	16.4163	21.0294	13.1127	13.8316	33.8662	36.8346	32.6397	34.7562	17.8221	17.5751	12.8427	17.8234
A0A369K197	21.406	21.3207	22.286	22.2065	16.1694	15.3312	14.064	15.5471	12.3512	12.1374	11.5155	13.8759
A0A369JY18	20.7568	21.6933	19.524	21.0757	10.2356	10.4474	9.54453	11.0762	50.5527	50.0524	50.6423	55.9708
A0A369KC14	22.7439	22.6792	22.888	23.4508	13.1645	13.3908	12.4302	12.5212	37.0516	40.8371	32.2758	37.9155
A0A369J2C4	23.046	23.105	25.1427	22.8583	31.5308	30.1517	32.1054	29.7419	12.8531	12.3471	10.527	12.2617
A0A369JSV3	21.3282	23.193	25.0494	23.6634	106.09	109.768	112.757	108.328	18.663	18.5068	17.6523	17.438
A0A369JNA1	23.3822	23.2755	23.0979	18.754	20.1293	19.3292	17.6608	17.2416	10.5573	12.8432	10.3954	9.03342
A0A369K8F1	22.0361	23.4765	15.8147	10.6105	13.9505	13.4364	12.5536	17.9638	19.9421	20.448	17.9506	18.9201
A0A369K2W4	25.366	23.8915	22.7266	24.5109	17.6774	17.5558	15.9979	19.4955	22.3802	26.2868	26.2017	12.1203
A0A369JER8	25.8329	24.0696	24.7862	23.5292	20.4865	21.178	20.4472	21.4936	24.3989	21.6057	28.6277	25.4658
A0A369K708	20.0708	24.151	24.5604	19.2921	63.3285	64.0041	64.3466	69.29	17.363	13.8369	14.4285	14.3023
A0A369JWT4	24.9577	24.2939	22.001	25.6814	53.1204	48.7624	51.0687	51.8658	11.2835	12.3671	10.7312	12.2143
A0A369JT83	25.8835	24.3303	24.0036	25.8236	6.97017	7.74975	6.95319	7.1385	25.9243	27.5565	23.9484	31.9868
A0A369JS43	22.7928	24.554	27.4045	28.8698	83.4349	83.8292	80.2002	83.5073	5.51009	5.12375	6.73852	7.81686
A0A369JL11	24.5404	24.6026	25.144	24.0374	52.703	47.0107	50.3448	51.6035	11.2133	12.9997	13.1149	13.6847
A0A369K382	24.531	24.6336	23.2259	21.1966	12.9987	12.6984	14.1989	12.4745	35.4158	37.3514	31.096	35.0896
A0A369K2X1	22.7146	24.9768	25.2187	29.6375	39.7153	40.2651	40.4842	39.576	21.1907	24.9413	20.955	21.3274
A0A369JXV9	21.5583	25.1799	22.9093	24.41	32.9598	34.9113	32.5034	32.1162	18.562	17.8582	17.4219	18.108
A0A369KC08	25.3519	25.2915	23.1216	23.2081	24.9765	25.1893	27.1437	30.7597	22.9062	23.663	20.8945	21.527
A0A369KA70	24.1666	25.5536	23.7705	26.0607	6.26244	5.10049	5.69921	5.35764	19.3654	18.8496	15.3839	19.4778
A0A369JK78	23.9005	25.5931	22.2736	33.641	4.10481	4.76516	4.46355	4.24879	50.3581	49.0415	57.4766	52.0811
A0A369JA19	24.7746	25.6533	22.7079	23.5811	43.6053	42.5462	43.8634	43.2527	15.8612	16.3342	16.6214	13.1044
A0A369K5V7	25.5076	25.888	19.2512	23.487	18.7644	19.7462	20.5791	19.0216	12.3378	12.653	15.0651	17.7389
A0A369K1X6	27.0623	25.9189	27.6364	29.3592	19.769	18.7224	19.8595	19.0303	30.2146	28.7293	29.3209	26.5949
A0A369K6L6	28.5316	26.6595	28.8332	25.2848	32.1122	33.9468	34.1698	33.8512	57.7848	59.5186	36.215	40.5007
A0A369JWM3	26.6009	26.7087	26.5618	24.8601	38.4535	41.6008	39.4199	39.6292	35.5639	42.1331	37.9782	34.7624
A0A369JX42	24.1706	26.7507	26.8261	19.4432	7.75306	9.08257	7.83949	7.80874	16.8493	17.5589	12.5752	16.2673
A0A369KAG9	25.7643	26.7988	33.4387	26.1105	1.27024	0.857724	1.28045	1.29078	38.0928	35.1581	43.3371	43.077
A0A369JXX7	26.2134	26.9709	25.5582	26.1177	10.0174	8.94914	12.9305	7.77867	21.3478	22.8719	22.1128	21.2603
A0A369JFB3	28.4188	27.0247	25.9988	23.9615	2.51644	3.4259	3.0145	3.54026	26.7838	29.1835	28.5684	30.9598
A0A369JT56	23.9868	27.0963	27.3691	27.5621	2.93235	3.06248	2.20241	3.49975	13.1051	13.3054	13.7129	12.6376
A0A369K552	24.9853	27.349	24.1955	27.6197	457.3	431.572	364.423	390.119	14.5971	14.6766	12.5805	13.1165
A0A369K5Q9	25.3221	27.5536	23.336	23.0587	8.21488	7.8456	9.36545	9.1541	23.4814	24.3809	26.0292	27.6027
A0A369K8W7	29.3772	28.5224	25.0274	31.7934	21.1317	23.7762	23.443	22.6242	24.6234	27.4541	29.0356	28.9089
A0A369JCW3	26.9592	28.6859	25.6148	29.115	164.383	155.42	159.635	152.292	27.7327	29.4398	28.1294	31.426
A0A369JR16	34.0316	29.0143	25.8905	23.0414	25.9332	23.3983	24.4882	24.9363	21.3691	21.7274	18.22	19.9463
A0A369JF09	25.5876	29.0727	31.2104	27.2932	27.4301	30.4082	28.2209	32.3527	28.555	33.7036	29.113	26.4263
A0A369JZK5	30.4523	29.2018	31.0265	29.3253	96.3381	95.7659	92.6876	105.614	23.9267	27.3892	21.844	23.5951
A0A369JKM5	28.1292	29.3603	25.497	24.9839	20.9163	21.7802	21.7105	21.7578	54.006	66.9991	48.6572	57.4596
A0A369IYY2	28.1008	30.9786	28.2043	29.5776	67.1576	68.46	68.6461	67.1809	9.74912	10.4056	10.0329	10.5649
A0A369JGG2	34.1376	31.751	31.8144	30.6665	109.488	117.275	110.243	116.803	21.2783	19.7111	20.0774	19.353
A0A369JU01	27.6872	32.105	29.152	37.9685	341.654	380.927	335.247	369.096	11.787	13.475	10.8498	15.1623
A0A369J9X4	31.4525	32.1332	31.7614	30.5778	25.6787	22.9536	24.5556	24.4626	33.3579	33.8535	29.715	30.3348
A0A369JE50	32.8431	32.8424	32.4597	36.6024	18.2306	19.2307	18.7241	20.0184	102.837	103.051	120.187	104.981
A0A369KC73	34.7452	33.531	33.334	31.9777	50.1793	48.544	45.8319	51.988	23.0028	27.7603	22.9817	22.5617
A0A369K0F9	31.7718	33.778	35.1347	31.3836	6.95431	6.30795	6.8542	7.68627	62.6575	64.5917	62.92	62.5327
A0A369JSV9	31.7781	33.9312	31.9448	38.3216	69.4905	67.7952	71.6947	67.4935	10.6743	9.55276	9.4293	10.4622
A0A369J8K4	29.9463	33.9327	29.8869	32.0161	185.517	186.37	186.247	183.805	12.7685	13.2992	12.1678	13.1947
A0A369JUV8	20.1312	34.1308	0.779334	0.909196	0.442029	0.327196	0.291439	0.261974	1.79832	1.90028	3.88013	4.60799
A0A369K032	38.3212	35.3285	44.0193	38.9678	0.890789	0.828151	1.46763	1.30527	4.91458	4.21226	4.29004	3.11208
A0A369KER8	37.4283	35.4742	34.7024	38.048	132.929	137.254	136.028	143.027	23.523	23.3759	20.3821	21.5814
A0A369JN97	34.6945	35.9271	26.7482	40.1177	13.2166	12.7497	12.6998	13.5846	59.6592	85.4937	52.2346	44.5589
A0A369JS64	32.8211	36.2347	33.9558	33.1067	100.23	124.923	120.141	136.315	5.01542	4.67638	4.97383	5.10313
A0A369JUZ4	32.4288	36.4283	34.9975	29.8312	10.8722	11.0769	10.6791	10.7694	24.2874	24.0601	21.1583	25.3374
A0A369K866	33.4793	37.4144	34.135	31.9485	166.383	168.639	156.896	169.376	32.812	35.759	28.9611	32.313
A0A369K7R0	32.7773	38.0106	32.931	35.477	58.8778	58.8537	57.9408	57.3694	54.5836	57.4476	55.6863	61.2673
A0A369JRI0	37.1449	38.4822	40.3473	38.7551	5.97016	6.28491	6.18887	6.82894	38.2864	39.4043	41.6386	41.5991
A0A369JT59	39.7826	39.5672	37.742	30.6993	18.497	21.0498	18.5841	19.1385	24.6722	23.0728	21.524	23.4318
A0A369JK75	43.1502	40.2321	38.999	48.6252	108.791	112.281	104.83	112.781	20.3419	20.2084	24.6281	24.3362
A0A369KEH5	44.8874	41.1893	40.9512	46.6364	281.104	283.396	296.105	271.233	16.5205	17.2075	14.3299	17.1872
A0A369JTH4	41.4476	42.7248	43.7303	43.1155	54.6681	59.0598	53.9648	57.7136	28.5437	26.889	32.5812	28.9235
A0A369J4J8	45.2077	42.87	44.8086	41.6149	27.3203	24.4145	24.1472	25.6782	48.424	55.0829	42.7758	42.9345
A0A369JP11	40.0357	43.0366	53.0921	46.3694	34.8003	106.556	35.3419	34.8905	54.1142	54.8121	51.7489	53.0723
A0A369J7D3	44.3334	45.1133	42.2325	44.5205	118.464	126.06	119.762	129.257	48.6172	48.2145	46.3719	52.5323
A0A369K4W2	36.013	46.0979	42.084	39.0821	37.5146	37.0955	37.1788	36.3602	78.0581	75.0862	77.6782	79.1826
A0A369K612	50.5861	47.8848	33.7773	48.7721	0.846216	1.00347	0.667782	1.11314	9.7311	9.74636	7.87698	8.30485
A0A369K7B5	50.5229	48.0756	47.6274	47.9218	39.8695	42.7556	38.8129	40.7839	50.6884	54.6593	47.7836	49.3509
A0A369K263	46.1638	48.9687	41.7504	44.4605	61.9791	56.8561	58.6584	60.9063	34.001	38.1854	38.5709	34.3138
A0A369JG56	46.0179	49.2188	45.014	43.095	7.69651	6.86979	6.40552	7.06141	33.4175	35.5551	25.9818	32.2606
A0A369JM63	52.5509	51.4994	46.2142	51.9736	57.2632	52.8678	58.5755	59.1803	38.3712	38.5752	36.9573	40.987
A0A369J1D5	66.9143	51.5272	58.5964	74.5507	37.8264	41.2389	42.2722	42.4326	59.0907	59.5011	69.5098	80.8285
A0A369K5V6	45.9733	53.3143	51.4501	38.9459	27.7665	29.1721	30.3456	31.311	51.7375	52.2984	50.1255	43.5071
A0A369JND0	54.3083	54.1961	63.9795	55.403	84.8652	74.0785	91.8235	74.9323	47.3145	53.2294	38.7375	39.5823
A0A369JRN8	52.6297	57.5839	66.0771	56.7396	33.3212	32.6537	35.7948	35.795	42.4439	40.4346	36.8837	33.758
A0A369JE69	60.8686	58.4	55.3055	49.7718	73.004	76.7057	71.6008	80.2399	57.0677	60.3045	50.3231	53.2
A0A369JUC6	52.3234	58.5137	54.8329	51.457	35.8027	37.9444	33.2927	38.3444	21.1342	18.8772	14.1486	19.2129
A0A369KE53	64.3461	60.2427	55.2306	61.3154	19.9715	18.8183	19.2697	19.2316	107.971	105.258	99.952	100.217
A0A369JDR1	58.1221	61.831	56.0475	51.8686	34.5711	37.3329	34.325	34.6635	44.3246	47.0201	39.2788	49.2531
A0A369J2W3	62.6939	61.8687	59.6074	53.2671	99.1907	99.5269	94.5012	102.149	87.6808	86.0806	86.7128	83.511
A0A369JNN0	62.6972	62.7653	64.2112	60.7849	432.674	424.166	506.393	454.783	77.5256	81.0935	69.5184	86.1481
A0A369K1U6	60.6631	62.9656	73.4965	63.5695	23.6199	24.7902	26.7114	26.072	78.6621	63.5359	71.4102	72.7012
A0A369K9P8	68.6339	62.9886	59.2049	58.9998	20.4451	22.6385	20.6388	21.2744	117.913	104.737	107.979	115.25
A0A369K666	61.9991	63.7361	68.919	67.9508	46.4959	44.3506	44.3414	44.1093	50.8636	50.0155	56.9361	56.3942
A0A369JZI9	68.631	63.9108	53.699	57.973	24.6914	25.8596	25.0409	24.2083	32.1866	32.9734	32.3635	32.9623
A0A369JKV9	66.4192	65.5958	67.7012	61.3739	61.537	57.5101	58.211	58.7461	100.177	95.26	98.9113	105.328
A0A369JF29	59.6639	67.1829	59.85	71.5827	16.2364	15.5575	14.6041	17.2048	66.7913	66.4405	73.5917	72.2541
A0A369J9N1	67.6424	73.1573	76.538	69.7247	112.285	108.244	113.482	128.148	20.8661	17.7494	22.3916	21.4987
A0A369JPN9	84.1949	73.3258	78.3694	72.4301	55.5801	58.0178	53.954	59.0089	53.5936	52.1321	47.1461	60.5065
A0A369JCR5	77.7439	75.3595	77.8929	77.9769	110.422	110.333	120.366	119.047	53.5987	52.3086	50.0531	53.2796
A0A369JUK2	86.2392	78.397	80.776	76.9494	72.0887	77.0465	73.6594	76.8111	56.5999	64.8843	59.2896	61.9752
A0A369J3A6	80.6825	79.4653	80.4389	71.3778	139.022	147.041	148.109	152.875	108.471	81.0314	71.3176	86.3693
A0A369JQM2	79.969	84.2142	73.7486	77.5671	39.2912	39.2448	41.4154	41.1727	61.9754	65.174	56.3243	69.1707
A0A369K2R0	83.8193	89.6352	94.244	79.0247	42.0885	40.3598	43.3623	45.9804	86.1251	86.7144	74.1348	84.948
A0A369JT17	90.5387	92.7494	91.648	105.7	38.0661	40.514	38.94	43.1185	95.0944	98.6245	101.943	104.986
A0A369JDX4	98.1937	97.4744	102.099	99.2458	34.5462	33.9942	35.0523	43.8849	70.7627	80.1573	80.5967	80.8691
A0A369JN96	105.615	107.825	108.282	126.266	15.6306	17.5511	14.8792	17.2841	61.6316	67.8322	77.0624	86.1614
A0A369JS72	123.575	127.123	110.603	125.455	346.707	342.106	334.173	336.982	110.955	111.944	107.235	112.819
A0A369KA69	118.791	130.706	131.856	121.371	244.068	249.822	250.454	258.465	61.2476	62.5753	57.3349	55.893
A0A369JRV0	122.058	145.931	127.277	120.575	2.24474	3.25364	3.047	3.12798	76.1527	78.0509	66.1435	73.467
A0A369JVP1	205.387	158.822	204.874	183.89	12.6001	11.6786	12.2771	11.8034	485.438	458.495	727.254	386.415
A0A369JWX6	185.902	186.536	139.456	175.445	475.668	456.613	476.811	469.745	79.9939	77.5125	82.3894	91.725
A0A369K6X7	201.003	202.122	204.284	179.797	73.5619	66.941	77.8986	74.8685	294.321	250.93	227.085	264.186
A0A369JTL1	280.209	239.644	304.552	207.815	48.1074	48.9529	44.2621	47.6692	287.914	235.084	254.791	154.777
A0A369K6Z3	279.102	243.936	275.34	233.934	133.122	140.096	145.126	159.302	46.8554	49.9263	41.3957	51.9854
A0A369K6D1	252.6	262.732	290.004	286.3	124.48	119.325	119.265	121.307	200.915	206.398	194.021	196.799
A0A369JNW5	244.759	281.093	257.414	273.916	564.315	599.336	590.597	632.291	193.099	188.858	190.693	125.678
A0A369K706	749.886	720.539	641.965	667.972	460.621	493.643	463.606	465.236	1041.68	1149.57	1008.67	743.08
A0A369JQ42	0.0645547	0.16759	0.0823042	0.0730281	0.247911	0.300711	0.358162	0.277075	0.0358668	0.0521698	0.0372846	0.060529
A0A369K8L8	0.1075	0.140123	0.160102	0.151263	0.0511915	0.0550419	0.0416455	0.0353439	0.127139	0.112606	0.106786	0.0839061
A0A369JG30	0.0356756	0.105832	0.0799683	0.1072	0.0361511	0.0283513	0.054606	0.0325484	0.124224	0.11977	0.104312	0.0871674
A0A369J6G7	0.0394277	0.0233803	0.0156863	0.0396587	0.0837071	0.0811449	0.0594974	0.0439217	0.0842569	0.0959205	0.0872422	0.0808001
A0A369JVN2	0.0424892	0.0611517	0.0433389	0.0481644	0.144969	0.145547	0.0973233	0.124766	NA	NA	NA	NA
A0A369K7Q9	0.0982761	0.1325	0.0369682	0.0287042	3.34351	3.11093	3.3622	3.26333	0.100609	0.220309	0.152184	0.00140697
A0A369JYA8	0.113219	0.133065	0.14523	0.109128	NA	NA	NA	NA	0.110204	0.108476	0.113481	0.0753325
A0A369JGS9	0.12116	0.294015	0.201085	0.171515	0.0756533	0.0883995	0.11388	0.10402	0.196822	0.158573	0.14871	0.352045
A0A369KGH1	0.137074	0.133113	0.145066	0.0992244	0.169991	0.350445	0.253299	0.192021	0.234529	0.111865	0.176695	0.328337
A0A369JJ31	0.142918	0.25328	0.11894	0.163867	3.97902	3.48049	2.81528	3.92502	0.609871	0.74822	0.585578	0.514756
A0A369K9T8	0.155694	0.246129	0.248569	0.231463	0.129596	0.116471	0.14874	0.0924226	0.138251	0.117011	0.11321	0.10091
A0A369JDW9	0.208318	0.205266	0.172216	0.17632	NA	NA	NA	NA	0.212311	0.173611	0.331199	0.249242
A0A369K068	0.262905	0.309918	0.296038	0.383644	0.83964	0.734312	0.652095	0.838755	0.310275	0.375312	0.230128	0.293215
A0A369KBL2	0.267245	0.257186	0.264448	0.273091	0.488485	0.523603	0.576164	0.338442	0.528437	0.144611	0.230961	0.197933
A0A369JG17	0.351876	0.249479	0.223474	0.283422	0.319176	0.250193	0.219735	0.267388	0.421126	0.477394	0.372832	0.509003
A0A369KBH9	0.433872	0.207245	0.346516	0.204033	0.164835	0.151899	0.172645	0.145236	0.340468	0.454121	0.281139	0.283691
A0A369K1V8	0.807485	0.680078	1.56499	0.697111	0.158595	0.098976	0.162145	0.427716	0.570169	0.647524	0.697504	0.614869
A0A369JSU1	0.214508	0.145617	0.138557	0.177753	NA	NA	NA	NA	0.130205	0.120751	0.155175	0.132152
A0A369J5G0	0.152659	0.174751	0.136821	0.121785	0.296182	0.234806	0.366876	0.270451	0.186533	0.209494	0.175963	0.25124
A0A369K4S9	0.141061	0.27355	0.516971	0.0427382	0.905958	0.476204	1.0685	0.900846	0.0558402	0.0803101	0.486736	0.00988005
A0A369JC85	0.212219	0.149937	0.12695	0.146465	2.87072	3.45837	2.14197	2.97375	0.181213	0.164649	0.128095	0.0772091
A0A369J6V8	0.204912	0.222389	0.134595	0.168064	NA	NA	NA	NA	0.165234	0.228854	0.164079	0.167869
A0A369K1X8	0.16146	0.188351	0.111549	0.115783	NA	NA	NA	NA	0.151379	0.21103	0.167639	0.179862
A0A369JP16	0.208911	0.173203	0.14303	0.0787955	0.376954	0.222356	0.200515	0.293504	NA	NA	NA	NA
A0A369J7L2	3.29639	3.12237	2.80065	3.32511	0.296908	0.329877	0.230269	0.199226	NA	NA	NA	NA
A0A369KAY0	0.00149304	0.128928	0.000384698	0.15313	NA	NA	NA	NA	0.00284689	0.049654	0.00113224	0.05328
A0A369K848	0.0376651	0.0494411	0.0295296	0.0444656	0.0665305	0.0994315	0.0676322	0.12512	NA	NA	NA	NA
A0A369K2A6	0.0495627	0.119437	0.064403	0.0742127	1.28057	1.2698	0.863502	0.829758	0.111988	0.0582891	0.066216	0.0467664
A0A369JRZ1	0.0618413	0.128027	0.116107	0.0609912	NA	NA	NA	NA	0.131195	0.130179	0.145364	0.104289
A0A369JJI7	0.076677	0.101509	0.053851	0.0655087	0.613569	0.684115	0.757641	0.674059	NA	NA	NA	NA
A0A369K1S0	0.0895722	0.109064	0.0805664	0.0585024	5.32487	5.97332	4.99486	6.04585	0.0661131	0.147267	0.127477	0.166626
A0A369JPM3	0.137239	0.165978	0.179054	0.184367	0.173229	0.149716	0.165678	0.148504	0.161046	0.25541	0.192529	0.201583
A0A369JXQ1	0.151925	0.203489	0.13886	0.257895	6.06076	5.51944	5.26799	6.37084	0.0745192	0.0446145	0.0792164	0.0464328
A0A369KGA9	0.151927	0.189822	0.223581	0.152783	NA	NA	NA	NA	0.263933	0.261234	0.107078	0.36818
A0A369JDR6	0.162842	0.147548	0.0881981	0.211643	NA	NA	NA	NA	0.180239	0.122195	0.178322	0.17844
A0A369KGT0	0.16529	0.18637	0.13641	0.165163	0.183096	0.193171	0.0550776	0.0649991	0.311359	0.9244	0.258878	0.803507
A0A369JDL5	0.193048	0.168209	0.351582	0.168249	0.177338	0.177091	0.114477	0.140393	2.29239	2.60668	2.33896	1.52453
A0A369JX65	0.198733	0.226933	0.234233	0.165216	1.58752	1.22248	0.878936	1.91265	0.153462	0.219092	0.126968	0.169639
A0A369JWQ5	0.20571	0.184518	0.241802	0.161347	0.18076	0.121186	0.232589	0.167628	0.315007	0.346041	0.345566	0.333411
A0A369J369	0.207023	0.151648	0.241348	0.164013	NA	NA	NA	NA	0.247689	0.246447	0.238691	0.258919
A0A369J9R9	0.210036	0.180211	0.202302	0.129211	0.0825407	0.0827004	0.0675286	0.0605899	0.127227	0.112092	0.127963	0.066704
A0A369J8B8	0.21383	0.26235	0.248572	0.288052	0.239937	0.222139	0.255695	0.23075	NA	NA	NA	NA
A0A369JII8	0.260545	0.22015	0.183506	0.247143	0.142264	0.184128	0.176589	0.193652	1.0849	1.1199	0.987852	0.433565
A0A369JVX3	0.427634	0.377227	0.367456	0.313613	0.0815273	0.088895	0.105992	0.0707004	0.36386	0.325205	0.389376	0.347905
A0A369KCF7	0.532782	0.473598	0.48466	0.530988	0.166106	0.115976	0.091477	0.0631248	1.64362	2.0126	1.75112	1.55631
A0A369K174	0.53314	0.344852	0.332475	0.337379	1.56628	1.65653	2.01025	2.32337	0.27348	0.184251	0.269273	0.402102
A0A369JIJ3	0.746546	0.660189	1.03013	0.65092	NA	NA	NA	NA	0.584431	0.606385	1.17787	0.345978
A0A369JSF4	0.0819823	0.119948	0.0964239	0.117743	0.184422	0.190969	0.175995	0.160499	0.199201	0.255636	0.235706	0.204321
A0A369JFT9	0.212581	0.235068	0.496289	0.161272	2.16606	2.23355	2.07799	2.21716	0.222729	0.101384	0.236543	0.289835
A0A369J4W6	0.20202	0.16265	0.186534	0.188127	NA	NA	NA	NA	0.369499	0.355988	0.305314	0.481291
A0A369KEU6	0.2587	0.244293	0.273113	0.258976	0.565748	0.720302	0.58153	0.676762	0.412897	0.434088	0.174763	0.422527
A0A369JH34	0.3371	0.287105	0.337765	0.34999	NA	NA	NA	NA	0.575503	0.474239	0.52409	0.397878
A0A369JUX1	0.307514	0.190627	0.189374	0.194588	0.11949	0.109436	0.11378	0.141194	NA	NA	NA	NA
A0A369JEV7	0.0663524	0.154925	0.0877824	0.0777498	0.0767389	0.0642301	0.120622	0.0966252	NA	NA	NA	NA
A0A369J218	0.0355049	0.0553721	0.0471065	0.104501	0.572745	0.527226	0.659479	0.581162	NA	NA	NA	NA
A0A369KDN6	0.0529247	0.0811339	0.0813171	0.0604262	0.27389	0.370837	0.55707	0.492545	NA	NA	NA	NA
A0A369JLF2	0.0696942	0.13135	0.0894151	0.195295	2.38706	2.32599	1.81706	2.07849	0.107963	0.163958	0.367156	0.241217
A0A369K202	0.092456	0.229897	0.189082	0.121649	0.689487	0.826672	1.04398	1.06517	NA	NA	NA	NA
A0A369JX36	0.0971223	0.135915	0.0674424	0.178461	NA	NA	NA	NA	0.291441	0.4318	0.355929	0.156307
A0A369JPJ1	0.111875	0.361731	0.344735	0.341312	1.28741	1.70689	1.34639	1.63096	0.387165	0.428242	0.503988	0.473781
A0A369KGA5	0.130923	0.168413	0.154347	0.209947	NA	NA	NA	NA	0.296312	0.302858	0.285644	0.340924
A0A369JW05	0.156376	0.134383	0.195812	0.148933	NA	NA	NA	NA	0.534614	0.703369	0.486185	0.473455
A0A369JXX5	0.161113	0.137726	0.0947052	0.0387244	9.33094	8.93647	9.17764	9.77465	NA	NA	NA	NA
A0A369JEP3	0.161374	0.179905	0.165768	0.13632	NA	NA	NA	NA	0.180669	0.147479	0.132689	0.118821
A0A369JET3	0.162925	0.154336	0.0642791	0.137625	NA	NA	NA	NA	0.12275	0.200896	0.72636	0.646216
A0A369JXB9	0.188394	0.161505	0.185157	0.185532	0.193364	0.142998	0.408806	0.352682	0.111052	0.196431	0.0968503	0.116277
A0A369K0Y3	0.204408	0.200729	0.206731	0.198087	NA	NA	NA	NA	0.63488	0.37178	0.383419	0.53936
A0A369JJ34	0.22075	0.233559	0.156691	0.316894	0.182265	0.624089	0.476351	0.197965	NA	NA	NA	NA
A0A369J8P4	0.225729	0.205832	0.196893	0.204283	0.363522	0.489544	0.397453	0.494313	0.78432	0.990656	0.840758	0.906569
A0A369JH00	0.231927	0.184377	0.263176	0.129252	0.314369	0.397443	0.404797	0.36958	0.210645	0.212811	0.202403	0.236903
A0A369K652	0.244549	0.2538	0.200702	0.203559	6.32144	5.33307	6.00498	6.29663	NA	NA	NA	NA
A0A369JNJ4	0.244933	0.149796	0.190275	0.100496	0.212643	0.208063	0.300315	0.304119	0.314476	0.229816	0.266531	0.244718
A0A369JID5	0.258027	0.135795	0.0521386	0.18828	0.777685	0.662587	0.200503	0.827924	0.256611	0.198278	0.230791	0.267973
A0A369J4Y4	0.274067	0.258894	0.289292	0.292002	NA	NA	NA	NA	NA	NA	NA	NA
A0A369K873	0.283591	0.238943	0.128032	0.152287	0.168695	0.135642	0.0902369	0.120174	NA	NA	NA	NA
A0A369K5V8	0.287845	0.351962	0.266755	0.272232	NA	NA	NA	NA	0.35876	0.357524	0.25254	0.322485
A0A369JW07	0.31258	0.447458	0.338383	0.302924	NA	NA	NA	NA	0.953003	0.88677	0.781414	1.05544
A0A369JFP5	0.435192	0.318738	0.377389	0.363012	0.443969	0.241552	0.461539	0.373957	NA	NA	NA	NA
A0A369K734	0.442415	0.312575	0.6373	0.320705	NA	NA	NA	NA	0.321884	0.258034	0.324759	0.38187
A0A369KCZ1	0.448947	0.35141	1.75568	0.459636	3.7597	3.81816	3.22892	4.17851	1.03422	0.914848	1.50689	1.63808
A0A369JQC9	0.494704	0.513284	0.531018	0.416056	NA	NA	NA	NA	0.469633	0.578967	0.51987	0.386337
A0A369K424	0.511876	0.423587	0.455691	0.522118	1.64005	1.5499	1.68252	2.01575	NA	NA	NA	NA
A0A369KBC1	0.535793	0.226673	0.148501	0.293285	0.133591	0.0888894	0.102911	0.0965954	NA	NA	NA	NA
A0A369JML9	0.602429	0.521153	0.528549	0.48693	NA	NA	NA	NA	0.884885	0.796351	0.887245	1.34157
A0A369K8E6	0.681995	0.263052	0.192172	0.349084	0.736629	0.586899	0.667672	0.591166	NA	NA	NA	NA
A0A369JIX2	0.89109	0.901929	0.584733	0.92753	0.406537	0.430467	0.443743	0.483831	0.206432	0.173161	0.14759	0.126414
A0A369JKH0	0.435325	0.350068	0.449971	0.358367	3.73355	3.98539	3.5944	3.62617	0.0253309	0.641618	0.371524	0.470126
A0A369JLH4	0.0645547	0.16759	0.0897667	0.0737888	0.617084	0.780042	0.799531	0.664515	0.0419714	0.0508178	0.0791222	0.063024
A0A369JTS2	0.3204	0.179044	0.262825	0.152226	0.750093	0.829576	0.69913	0.702938	0.0638233	0.105296	0.479194	0.459306
A0A369JWS9	0.148718	0.156423	0.160054	0.124111	NA	NA	NA	NA	0.152102	0.143254	0.138447	0.115763
A0A369IZE8	0.173758	0.198914	0.47554	0.13023	1.71859	1.16213	2.30107	1.68186	0.203289	0.176818	0.185785	0.201481
A0A369J5N1	0.319788	0.44525	0.0926666	0.608458	NA	NA	NA	NA	0.251117	0.246303	0.22686	1.5003
A0A369JNY3	0.167447	0.17004	0.11834	0.101753	0.354689	0.371796	0.353383	0.390767	0.254366	0.23237	0.2569	0.181569
A0A369J7K7	0.230501	0.212798	0.327109	0.165099	NA	NA	NA	NA	0.254433	0.252667	0.199776	0.243451
A0A369JE84	0.223268	0.250982	0.27211	0.197809	0.433759	0.701946	0.565845	0.495673	0.308637	0.358973	0.380828	0.376759
A0A369K845	0.16146	0.190673	0.111561	0.117123	3.35813	3.21929	3.48635	3.21248	0.368151	0.442525	0.370105	0.298131
A0A369JUN5	0.274319	0.405223	0.311842	0.297598	NA	NA	NA	NA	0.387595	0.433597	0.286727	0.404364
A0A369KCW4	0.512012	0.511421	0.530329	0.533089	10.5661	11.6435	12.0195	12.1595	0.519319	0.710169	0.829319	0.828434
A0A369JG86	0.0942313	0.0871753	0.047722	0.0669993	0.33168	0.031596	0.26437	0.303202	0.614514	0.6058	0.659039	0.670113
A0A369KCN2	0.536814	0.566332	0.497454	0.638393	NA	NA	NA	NA	0.752087	0.730258	0.843452	0.562947
A0A369K427	0.794511	0.769516	1.57029	0.87855	6.0684	6.61608	6.28769	6.0164	0.841026	0.772479	0.680708	0.78637
A0A369K0T7	0.358993	0.285314	0.304999	0.323264	1.34695	1.61137	1.69776	1.61995	0.857393	0.532045	1.021	0.708804
A0A369K126	0.199535	0.243765	0.0958756	0.622387	NA	NA	NA	NA	0.995859	0.994997	0.913241	0.75131
A0A369JE73	0.475945	0.499189	0.49249	0.429941	NA	NA	NA	NA	1.46169	0.263772	1.57965	1.50216
A0A369K8U8	0.337813	0.321933	0.32396	0.309477	1.29704	1.31819	1.21457	1.42471	1.54482	1.85858	1.50776	1.82744
A0A369JM81	0.453057	0.533161	0.462104	0.498694	NA	NA	NA	NA	1.92091	2.38453	2.05188	2.04839
A0A369JP06	0.162732	0.149937	0.124313	0.144806	0.129178	0.212201	0.186024	0.184959	NA	NA	NA	NA
A0A369K8X8	0.168011	0.23201	0.129661	0.103482	0.222423	0.16495	0.194568	0.165447	NA	NA	NA	NA
A0A369JAF9	0.460228	0.417034	0.351848	0.387831	0.348603	0.156062	0.34721	0.231274	NA	NA	NA	NA
A0A369J2T2	0.362228	0.299739	0.426785	0.276473	0.378172	0.459447	0.284206	0.338454	NA	NA	NA	NA
A0A369JTT8	0.0685127	0.0946277	0.033968	0.0544311	0.452502	0.465707	0.380342	0.449017	NA	NA	NA	NA
A0A369JEF1	0.159803	0.11666	0.142523	0.155427	0.51149	1.80823	1.89095	0.158886	NA	NA	NA	NA
A0A369J8Y9	0.070899	0.099822	0.0375719	0.0420492	0.900206	1.00069	1.03967	0.689142	NA	NA	NA	NA
A0A369KFK6	0.218966	0.235172	0.20853	0.202448	1.06166	0.876776	1.06005	0.904355	NA	NA	NA	NA
A0A369JGM5	0.212631	0.248591	0.215805	0.19413	1.12923	1.38095	0.957339	0.469902	NA	NA	NA	NA
A0A369K1U2	0.453735	0.376855	0.355241	0.394452	1.37631	1.21836	1.40123	1.24508	NA	NA	NA	NA
A0A369JJH9	0.233713	0.20842	0.208683	0.245132	NA	NA	NA	NA	NA	NA	NA	NA
A0A369JPF7	0.171717	0.202216	0.225921	0.175168	NA	NA	NA	NA	NA	NA	NA	NA
A0A369JX24	0.455171	0.320606	0.301645	0.356905	NA	NA	NA	NA	NA	NA	NA	NA
A0A369K2A9	0.213598	0.265257	0.318551	0.27418	NA	NA	NA	NA	NA	NA	NA	NA
A0A369JIK0	0.0377527	0.13154	0.0478376	0.155054	3.61577	3.60398	3.92658	2.89476	0.0432343	0.0441939	0.262167	0.0507599
A0A369JTD8	0.0486169	0.0899553	0.0485391	0.0533823	NA	NA	NA	NA	0.556546	0.816976	0.604228	0.749144
A0A369K5Q8	0.0680894	0.0873169	0.0822318	0.0653495	0.264536	0.152113	0.18157	0.318944	NA	NA	NA	NA
A0A369K468	0.085018	0.132651	0.25982	0.649052	0.7939	0.669049	0.754144	0.383339	5.54702	5.1827	5.42773	5.60762
A0A369KAN3	0.0864577	0.134535	0.0863725	0.103748	NA	NA	NA	NA	NA	NA	NA	NA
A0A369JII4	0.0865084	0.161419	0.217545	0.282347	7.24087	5.02373	6.6051	6.09346	0.201689	0.250742	0.248129	0.16956
A0A369JKR9	0.0970788	0.120182	0.0552734	0.0994491	NA	NA	NA	NA	0.0934825	0.104779	0.122715	0.0657889
A0A369JYY2	0.102467	0.149684	0.18231	0.0694114	2.77422	3.20496	2.04638	2.35956	0.810092	0.776694	0.790669	0.716216
A0A369JUV5	0.111166	0.146164	0.107787	0.128504	NA	NA	NA	NA	0.0961224	0.09298	0.0904585	0.101513
[truncated: 744 more rows]
