# Supplementary material for: Label-Free Comparative Proteomics Analysis Revealed Heat Stress Responsive Mechanism in Hypsizygus marmoreus
Source: Front Microbiol. 2021 Jan 5;11:541967. doi: 10.3389/fmicb.2020.541967 (PMC7813762; doi:10.3389/fmicb.2020.541967)
Supplement: Supplementary file 2 [file Data_Sheet_2.xlsx]

## Sheet: Data Sheet
Supplementary Table 2 Expreesion fold change of detected proteins between different groups
Comparison between HS group and Con group			Comparison between HS group and RHS group			Comparison between RHS group and Con group
UniProt ID	p adjust BH	Fold Change of HS/Con	UniProt ID	p adjust BH	Fold Change of HS/RHS	UniProt ID	p adjust BH	Fold Change of RHS/Con
A0A369JJY9	0.00218408	0.0461784	A0A369JPL9	0.0490611	3.72826	A0A369KAY0	0.441337	0.37654
A0A369JVP7	0.00107234	0.256921	A0A369JYT6	0.000621218	69.736	A0A369JVV2	0.621734	1.96022
A0A369K039	0.00469448	0.0257632	A0A369JVV2	0.843175	1.17544	A0A369K9Z7	0.11434	5.15737
A0A369K904	0.175205	0.446506	A0A369KD77	0.0189487	3.97721	A0A369KAS1	0.231653	4.12101
A0A369JR83	0.0139325	0.074482	A0A369KA79	0.0906555	2.51389	A0A369JM09	0.0694949	0.437304
A0A369JDY0	0.00844772	0.212157	A0A369JLR0	0.00544601	5.03579	A0A369JW65	0.00829715	0.118129
A0A369JVD8	0.000585062	0.076361	A0A369J1J9	0.000837625	90.7747	A0A369JKH0	0.912935	0.946583
A0A369JSD1	0.00743116	0.186499	A0A369JR33	0.000270217	133.826	A0A369K5R6	0.709235	0.85484
A0A369JG30	0.0876819	0.461418	A0A369JIK0	0.00087028	35.0715	A0A369K7Z1	0.349252	0.368612
A0A369K2J9	0.0259589	0.173898	A0A369JXQ1	0.000565057	94.8556	A0A369JPV3	0.628216	1.30838
A0A369K3A5	0.0016432	0.0540448	A0A369JDA6	0.00921981	7.59129	A0A369JQ42	0.176422	0.479642
A0A369JI25	0.000203404	0.120864	A0A369J6D0	0.0013507	6.69084	A0A369JLR0	0.034939	0.574346
A0A369JH37	0.00112707	0.0814229	A0A369J7J6	0.32822	1.5492	A0A369JUQ7	0.364106	2.43515
A0A369K4D4	0.100063	0.807628	A0A369IZT7	0.00164136	13.6965	A0A369JLH4	0.248753	0.593721
A0A369K9Z7	0.521026	0.584826	A0A369JLH4	0.00119013	12.1786	A0A369JXP5	0.00553918	0.122829
A0A369JB62	0.00176423	0.0849952	A0A369JQ42	0.00221122	6.36996	A0A369JIK0	0.94095	1.07569
A0A369K4X6	0.335029	0.761161	A0A369JU88	0.314369	48.8396	A0A369J6D0	0.016922	0.279086
A0A369J757	0.0183425	0.341895	A0A369JZX2	0.0246381	2.22633	A0A369IZN7	0.0979492	0.464424
A0A369K2U7	0.0001183	0.241078	A0A369JG08	0.0391454	7.90019	A0A369KEJ7	0.00681743	0.120795
A0A369K8L8	0.00347648	0.327776	A0A369K2A6	0.00607835	14.9814	A0A369JKU7	0.078508	0.381764
A0A369JIN2	0.00108097	0.0204232	A0A369K3Y8	0.736576	0.917351	A0A369K7Q0	0.000912605	0.12946
A0A369JIW6	0.000102863	0.277096	A0A369JXW0	0.0842798	3.53283	A0A369J2L3	0.0459106	0.154828
A0A369J6R9	0.0208039	0.376889	A0A369J196	1.74213e-06	14.5776	A0A369K4S9	0.658763	0.649444
A0A369JVV2	0.00230934	2.30412	A0A369K7Q0	0.0113259	22.6697	A0A369K658	0.954002	1.03898
A0A369JX45	0.0395142	0.209631	A0A369JUQ7	0.000478925	8.38868	A0A369KC06	0.318307	0.765111
A0A369K2B0	0.00837759	0.267778	A0A369K340	0.00837199	16.553	A0A369JTM4	0.328036	0.787668
A0A369JBS0	0.018722	0.290619	A0A369IZL5	0.00208337	13.8628	A0A369J0X4	0.0343402	0.652781
A0A369JGG8	0.00419952	0.454437	A0A369JI18	0.126042	2.54772	A0A369JKB8	0.37754	1.76094
A0A369K848	0.0447299	2.22664	A0A369KEJ7	0.0101446	4.72512	A0A369K4L7	0.429185	0.746048
A0A369J175	0.00238255	0.0602855	A0A369K220	0.0160802	3.38279	A0A369JTS2	0.760431	1.21118
A0A369J4A2	0.0232453	0.473915	A0A369K658	0.0596313	5.24817	A0A369JWY1	0.102914	0.328735
A0A369K4T7	0.0695044	0.110235	A0A369K5J6	0.00282202	15.4243	A0A369K1S0	0.206899	1.50274
A0A369J5C4	0.93851	0.975513	A0A369JBD0	0.000101224	4.44755	A0A369KAA9	0.701036	1.2891
A0A369JDS4	0.194759	0.661018	A0A369K732	0.000369632	5.82301	A0A369J196	0.962793	1.02608
A0A369J6R4	0.00823788	0.111105	A0A369K4S9	0.0103892	5.29661	A0A369JB39	0.0860011	0.316701
A0A369JGS9	0.0800339	0.48485	A0A369K3Q2	0.00018867	25.5092	A0A369JXQ1	0.0308475	0.325436
A0A369K2V7	0.00500454	0.229286	A0A369JM09	1.3751e-05	12.2051	A0A369J5D4	0.151827	2.35246
A0A369JIZ5	0.00301385	0.448941	A0A369K6M6	0.000437418	5.09092	A0A369KCL0	0.522028	0.721395
A0A369JWK3	0.033907	0.213296	A0A369K4W4	0.000959721	15.1007	A0A369JMK6	0.0143082	0.207761
A0A369JEV7	0.786688	0.926078	A0A369IZN7	0.00264947	27.4891	A0A369JG08	0.0642377	0.372457
A0A369JQU2	0.0308661	0.316775	A0A369JQC2	0.00842133	6.74049	A0A369K662	0.930763	0.967133
A0A369K9R4	0.116782	1.76451	A0A369JE98	0.0839393	2.11233	A0A369J6G7	0.00334347	2.94719
A0A369K238	0.00425534	0.0659673	A0A369J3X9	0.0138366	6.90092	A0A369JWA4	0.394367	1.45086
A0A369JVX3	0.00136176	0.233601	A0A369K664	0.0101446	4.43863	A0A369J966	0.00891706	0.0691049
A0A369J9R9	0.0108389	0.406451	A0A369K557	0.00649907	3.27332	A0A369JBD0	0.00515757	0.429491
A0A369J6G7	0.0272577	2.27054	A0A369JGB7	0.0244356	2.65464	A0A369K7C8	0.000796805	0.163236
A0A369KF63	0.1796	0.156811	A0A369J6G7	0.139374	0.770408	A0A369J929	0.131211	0.485482
A0A369JRZ2	0.0274951	0.0234611	A0A369K254	0.00040001	4.68764	A0A369K2J5	0.0123411	0.495573
A0A369JZW1	0.0574492	0.128164	A0A369J3U9	0.949286	1.01708	A0A369KC56	0.0183889	3.29073
A0A369JX34	0.304469	1.19511	A0A369JFT9	1.87279e-06	10.2232	A0A369J902	0.0696867	0.455116
A0A369K762	0.000115399	0.0542611	A0A369JN55	0.00118106	3.4153	A0A369JKR9	0.884593	1.03974
A0A369JBT2	0.399799	0.870353	A0A369J929	0.00282913	2.44814	A0A369K254	0.28938	0.502659
A0A369KEM8	0.0011669	0.0265765	A0A369K4D4	0.0840566	0.594185	A0A369J837	0.709109	1.24249
A0A369JGN0	0.00061328	0.112455	A0A369KC56	2.05764e-05	10.6071	A0A369JUV5	0.0795089	0.771997
A0A369JB74	0.404054	0.628718	A0A369JE64	0.00585239	1.99977	A0A369JU88	0.0617257	0.673136
A0A369KDR0	0.00581339	0.0672632	A0A369K9T1	0.0404401	2.41442	A0A369K0H7	0.123501	1.73979
A0A369JBR3	0.000546593	0.286759	A0A369JTS2	0.0274581	2.69202	A0A369K4D4	0.238691	1.35922
A0A369JB39	0.0520568	0.234907	A0A369K904	0.00478653	0.0797724	A0A369JM51	0.0191899	0.749627
A0A369K051	0.000688194	0.221475	A0A369KAH6	0.00338481	2.68162	A0A369JUY2	0.0026644	0.171167
A0A369JWH5	0.00061771	0.0823278	A0A369K6L0	0.000833258	11.1697	A0A369K7Q9	0.513196	1.60064
A0A369JF34	0.000910077	0.0914537	A0A369JL95	0.000118941	10.7227	A0A369K4W4	0.00987943	0.108017
A0A369JPN0	0.0257427	0.348034	A0A369JND2	0.00948164	21.7717	A0A369JGB7	0.0207405	0.250164
A0A369K811	0.000136949	0.00458116	A0A369KGH1	0.681023	1.13428	A0A369K6R3	0.246216	0.696031
A0A369K155	0.00159646	0.0133529	A0A369J9R9	0.102471	0.675967	A0A369K3F3	0.00103857	0.36873
A0A369JN45	0.00211935	0.199656	A0A369K7C8	0.000163869	6.88963	A0A369JLF2	0.245976	1.81222
A0A369J9P0	0.0117299	0.699898	A0A369KB08	0.000205481	40.328	A0A369J490	0.00603974	0.306529
A0A369JK68	0.0140131	0.478876	A0A369JQG9	0.138414	2.72214	A0A369JCE5	0.443557	0.870703
A0A369JUE6	0.00107234	0.124057	A0A369K8L8	0.00432157	0.425668	A0A369K8P7	0.000552591	0.193745
A0A369K9B2	0.87344	1.08329	A0A369JP82	0.00360004	3.07125	A0A369JYA8	0.15855	0.81394
A0A369JLR0	0.0125317	2.89229	A0A369JMK6	0.000443397	13.646	A0A369JYI9	0.00322663	0.343948
A0A369JJX7	0.00220648	0.0337871	A0A369K3F3	0.00550806	6.6646	A0A369JXB9	0.160574	0.722479
A0A369K0S3	0.637767	1.27301	A0A369K9T8	0.784036	1.03802	A0A369K2A6	0.830325	0.920823
A0A369JKD5	0.0181803	0.122344	A0A369KCE2	2.88985e-06	19.0858	A0A369J9P0	0.22711	0.86315
A0A369JUL7	0.000839194	0.194243	A0A369K1Q3	0.00204035	6.5097	A0A369J5V7	0.463323	0.771319
A0A369JGG3	0.0184308	0.31672	A0A369JIR0	4.78599e-05	116.363	A0A369JIY3	0.156046	0.683453
A0A369K2B9	5.89702e-05	0.0369079	A0A369JYK2	0.00121789	32.6995	A0A369JVR5	0.0935276	0.429393
A0A369JJC8	0.009225	0.244909	A0A369KBX8	0.644463	1.08247	A0A369JWD6	0.00142456	0.52186
A0A369JJM0	0.00765342	0.317756	A0A369JG30	0.00159923	0.348257	A0A369JTP5	0.0186751	0.274131
A0A369JKF0	0.601979	0.762205	A0A369JUI7	0.0269369	1.49454	A0A369K904	0.0132895	5.59725
A0A369K3V2	0.000568162	0.285202	A0A369J490	0.000193007	13.6917	A0A369KCE2	0.580652	1.08279
A0A369JEP8	0.00256683	0.28792	A0A369KAS1	0.0381761	2.58415	A0A369JK68	0.479354	2.46847
A0A369KAC0	0.0209871	1.36186	A0A369JXP5	0.000963339	24.6094	A0A369K664	0.132844	0.55968
A0A369JM24	0.0229899	0.386117	A0A369JLL3	0.0872455	1.67785	A0A369JU96	0.000242698	0.120595
A0A369J7B4	0.00396625	0.237971	A0A369J9P0	0.0967849	0.810864	A0A369IYW8	0.840802	0.961501
A0A369K3T8	0.00333096	0.272773	A0A369J966	9.80481e-06	19.4113	A0A369JL15	0.568923	0.88172
A0A369K3R0	0.0243349	0.519103	A0A369JUL5	0.00345954	2.75485	A0A369JRX7	0.748096	0.837141
A0A369JWS2	7.90914e-05	0.0541736	A0A369JU76	4.68364e-05	18.326	A0A369JL47	0.421033	1.46988
A0A369JWF8	0.000300659	0.153377	A0A369JDV9	0.00422192	20.4295	A0A369KDV1	0.0714694	0.724443
A0A369K855	0.00714079	0.348508	A0A369JCP5	0.000251447	48.2302	A0A369K9T1	0.899568	0.955605
A0A369J768	0.0724431	0.181327	A0A369JM88	0.000642173	22.346	A0A369JET3	0.207979	3.26722
A0A369K2K0	8.96671e-06	0.1205	A0A369JL47	0.0179477	16.539	A0A369JP65	0.000596207	0.342722
A0A369JUX1	0.0492276	0.548576	A0A369JA29	0.868724	1.03574	A0A369K357	0.0276482	0.197371
A0A369JQI1	0.00239545	0.270304	A0A369JVZ3	0.0314869	2.4221	A0A369K3Q2	0.0143082	0.197403
A0A369JS76	0.110584	0.577045	A0A369JBA6	0.00170497	5.08718	A0A369JG30	0.286241	1.32494
A0A369JCR2	0.0229899	0.314242	A0A369JA04	0.00610888	6.75788	A0A369JI43	0.039524	1.40098
A0A369JAS2	0.0288399	0.273187	A0A369JTP5	0.615683	0.840413	A0A369JBT1	0.0189226	0.404871
A0A369J817	0.00277104	0.0313517	A0A369JUG0	0.195968	1.61208	A0A369KAT8	0.0938469	0.369717
A0A369K5Z5	0.000124302	0.227954	A0A369JJZ0	0.833134	0.918023	A0A369JFB2	0.974961	0.978938
A0A369JMG4	0.00322008	0.133959	A0A369JJQ9	0.000119444	3.43932	A0A369K8L8	0.11434	0.770027
A0A369K676	0.0072081	0.483826	A0A369JUW4	0.00366654	4.31446	A0A369J9R9	0.0447724	0.601288
A0A369JK87	0.000186738	0.031377	A0A369JZP9	0.0906555	1.22821	A0A369JUL5	0.00807485	1.28854
A0A369JNV1	0.0336845	0.426294	A0A369K8Y7	0.000863264	3.43143	A0A369JSU1	0.197108	0.795763
A0A369JZ90	0.0750847	10.9662	A0A369KAT8	0.0814987	1.2026	A0A369JB74	0.00445477	0.425716
A0A369JRZ8	0.0103082	0.187823	A0A369JI95	0.00117651	11.0884	A0A369JWH8	0.470337	0.856685
A0A369JP06	0.185668	1.22443	A0A369JCB0	0.133555	0.653444	A0A369JH43	0.385092	0.789462
A0A369K9T8	0.0184001	0.552506	A0A369JFB2	0.00104764	5.73515	A0A369JRZ1	0.190938	1.39257
A0A369JHE0	0.000521297	0.187703	A0A369K7N2	0.109607	1.78361	A0A369JBE4	0.00897063	0.614376
A0A369KBC1	0.120385	0.350415	A0A369J9B5	0.00129252	3.68068	A0A369JLU7	0.20188	1.54281
A0A369J4F3	4.60516e-05	0.102388	A0A369JP65	0.00155469	14.3823	A0A369JIR0	0.0189964	0.588907
A0A369JTZ5	0.000386348	0.125701	A0A369KBL2	0.112364	1.74845	A0A369JFI2	0.161485	2.84758
A0A369KCI6	0.000929575	0.231285	A0A369J6G9	0.000187206	19.7074	A0A369JQB4	0.0567341	0.399839
A0A369JTV6	0.000738163	0.409899	A0A369JQB4	0.0222984	2.65471	A0A369K8Y7	0.00103777	0.136235
A0A369K2Y5	0.0118591	0.191292	A0A369K357	0.0506436	2.32238	A0A369K7V2	0.810361	1.08621
A0A369JGI9	0.00621377	0.0738083	A0A369JJN1	0.00216517	5.41593	A0A369K4H2	0.0617257	0.756319
A0A369JIU0	0.00775232	0.19249	A0A369JBT1	0.228504	1.62158	A0A369JE10	0.0881644	0.658792
A0A369J462	0.00146038	0.205	A0A369K1S0	0.000623177	44.019	A0A369JGT3	0.00118192	0.332153
A0A369K7Q5	0.0221602	0.186533	A0A369K8P7	0.00293355	4.4262	A0A369K9T8	0.0296468	0.532268
A0A369JK54	0.00654222	0.104274	A0A369JW65	0.00418485	14.5265	A0A369JTV6	0.000444326	0.382146
A0A369JHK2	0.00742127	0.232701	A0A369JX88	0.00603569	2.33815	A0A369JND2	0.0032906	0.156534
A0A369K9X8	5.89702e-05	0.270058	A0A369K033	0.393848	0.71528	A0A369JND3	0.0212175	0.435496
A0A369JII8	0.0573194	0.764402	A0A369K497	0.000211361	41.9379	A0A369IZL9	0.8993	0.901905
A0A369K662	0.84351	0.964972	A0A369JLU7	0.00215616	17.0112	A0A369JP22	0.175401	0.460963
A0A369JEI2	0.000598153	0.397226	A0A369JTV6	0.591446	1.07262	A0A369KAB6	0.101715	1.52577
A0A369JVN2	0.00570185	2.62681	A0A369K415	0.0689642	5.27388	A0A369JYK2	0.000552591	0.303322
A0A369JND3	0.0109317	0.246753	A0A369JJK1	6.63874e-05	24.4002	A0A369IYG0	0.0907573	0.766084
A0A369JFN4	0.00695555	0.11428	A0A369JB39	0.223071	0.741733	A0A369JVE0	0.481741	0.844717
A0A369J8M5	0.00234756	0.41541	A0A369JQ26	0.367736	0.7759	A0A369KB53	0.0308978	0.368687
A0A369K6N2	0.0316098	0.254327	A0A369JB74	0.632807	1.47685	A0A369JUE7	0.0143082	0.0700971
A0A369K7P3	0.190413	0.264	A0A369JGS9	0.0997569	0.446129	A0A369K1X8	0.258521	1.23004
A0A369JGM2	0.0056239	0.497763	A0A369JBE4	0.000314153	4.85359	A0A369JWS9	0.485092	0.932565
A0A369K3M9	0.000648854	0.340416	A0A369KAC0	0.0807104	0.833607	A0A369J918	0.0677726	0.612825
A0A369J852	0.00158427	0.270507	A0A369JP22	0.00113778	26.4871	A0A369JX65	0.231705	0.81099
A0A369JCT3	0.00377045	0.464294	A0A369J8U7	0.0168066	2.49119	A0A369JQH6	0.00451783	0.232
A0A369JGB7	0.0898623	0.664095	A0A369JXM1	0.528913	1.6741	A0A369K5A1	0.00432488	0.595219
A0A369JZK0	0.0135041	0.382452	A0A369JAI9	0.764427	1.23833	A0A369JX88	0.584004	0.639515
A0A369JVR5	0.212624	0.492372	A0A369KFL9	0.11368	2.00181	A0A369JXM1	0.991006	1.01676
A0A369KA45	0.000506601	0.0563359	A0A369JLF2	0.000485962	9.77922	A0A369JQS8	0.00117464	0.127882
A0A369J9N3	0.00985431	0.366966	A0A369KGE8	0.172753	0.778521	A0A369JEU3	0.67709	0.962809
A0A369K1V8	0.0460104	0.226002	A0A369JC85	0.00352715	20.7647	A0A369K6L1	0.0361848	0.495908
A0A369JNL6	0.0662949	0.788067	A0A369JNL6	0.391681	1.07747	A0A369JZX9	0.207979	1.34721
A0A369KBH4	0.000511756	0.122378	A0A369JHP2	0.0031105	3.01854	A0A369J2M5	0.253544	0.87008
A0A369K882	0.000136123	0.172259	A0A369JY97	0.000129299	11.6584	A0A369JRP0	0.0455817	0.442034
A0A369K9T1	0.0421224	2.30723	A0A369JZK0	0.147754	0.661177	A0A369JNL6	0.0471773	0.731408
A0A369K4R0	0.00273838	0.105861	A0A369JH43	0.000799573	5.33745	A0A369JMI2	0.965112	1.01317
A0A369JM89	0.00059026	0.142959	A0A369JCE1	0.000788387	2.54695	A0A369IYA1	0.0221826	0.620967
A0A369KBH9	0.106798	0.532545	A0A369K888	0.00344039	6.61341	A0A369JJQ9	0.141127	0.323049
A0A369KAS1	0.000358816	10.6493	A0A369JBM6	0.04454	1.91743	A0A369JN14	0.00191937	0.470779
A0A369KCF7	0.00010734	0.215963	A0A369JXH4	0.807948	1.08847	A0A369JPM3	0.232775	1.2159
A0A369K3E5	0.0872562	1.49456	A0A369JS60	0.0713095	2.91265	A0A369JXB0	0.0976022	1.52161
A0A369IZU7	0.51421	0.871045	A0A369K0H7	0.00615293	1.84554	A0A369K6L0	0.165835	0.241498
A0A369KA60	0.0358274	0.451282	A0A369JMI2	0.00466526	17.1261	A0A369JI95	0.00272937	0.192282
A0A369K873	0.166321	0.641148	A0A369J7D4	0.00339155	5.98529	A0A369JCE1	0.00107789	0.252762
A0A369JB20	9.70741e-05	0.123009	A0A369JQS8	0.00109045	12.9515	A0A369JDS4	0.0263082	0.379314
A0A369JCZ0	0.0579487	0.458316	A0A369JIX2	0.000136554	2.69979	A0A369J6V8	0.978452	0.994625
A0A369KGH1	0.0795395	1.87716	A0A369JTN5	0.000367107	4.12497	A0A369JIM5	0.109212	0.705607
A0A369J3A9	0.0311429	0.229825	A0A369KCF5	0.00132981	4.56806	A0A369KCF5	0.0156039	0.391638
A0A369JZY7	0.252172	0.838581	A0A369JK68	0.305681	0.193998	A0A369KBL7	0.0337789	0.393282
A0A369KBZ6	0.000512636	0.012935	A0A369K5V4	0.000804759	3.42282	A0A369K5E1	0.0935943	0.663516
A0A369JPM3	0.599604	0.955731	A0A369J1R1	0.00162466	0.695984	A0A369JRJ7	0.00114881	0.212358
A0A369J7D5	0.0321804	0.484642	A0A369JEK4	0.0100605	7.15369	A0A369K888	0.409987	0.588413
A0A369K4Y0	0.385377	0.890594	A0A369IZE8	0.0106246	8.94434	A0A369JZP9	0.0202663	0.699103
A0A369K4P8	0.640476	1.11122	A0A369JGM8	0.0162256	3.04064	A0A369J979	0.860204	1.03538
A0A369JTP5	0.0116671	0.230383	A0A369JP43	0.000515266	16.2705	A0A369JNF8	0.00871196	0.474335
A0A369K889	0.0577621	1.62235	A0A369K3L0	0.22544	0.747675	A0A369JXD1	0.0281802	0.486016
A0A369JHI0	0.0997401	0.334879	A0A369J902	9.90711e-05	9.2765	A0A369JNV1	0.143829	0.667288
A0A369JDL5	0.252573	0.691529	A0A369JGT3	0.00224011	8.42778	A0A369J9B5	0.007662	0.204044
A0A369JUN7	0.00283951	0.790298	A0A369JF77	0.000410405	57.0012	A0A369JUI7	0.00039406	0.31127
A0A369JZP9	0.0640443	0.858643	A0A369JHX8	0.0163593	4.61519	A0A369JXT6	0.0136074	0.105171
A0A369K3N9	0.00346825	0.115013	A0A369JCZ6	0.00156351	5.34337	A0A369JCR2	0.474524	0.790132
A0A369J6Q3	0.00402314	0.16398	A0A369JSD1	0.0443522	0.100695	A0A369J9G8	0.352232	1.13206
A0A369JDX0	0.00808785	0.447742	A0A369JAH0	0.0222689	11.1938	A0A369JDR6	0.750542	1.08024
A0A369KAT8	0.0906546	0.444623	A0A369J2L3	0.00138523	17.0578	A0A369JEP3	0.439293	0.900976
A0A369J1C8	0.00133635	0.212108	A0A369JA34	0.000575496	3.25203	A0A369J9N3	0.0283237	0.398512
A0A369JWQ5	0.487445	0.88503	A0A369K174	0.00315443	6.6924	A0A369K5Q1	0.784168	0.930826
A0A369J0G4	0.000121041	0.321302	A0A369K6K3	0.00145043	13.9202	A0A369JC85	0.576113	0.867198
A0A369JKP0	0.0926411	0.26665	A0A369JZX9	0.381219	1.59798	A0A369K9W4	0.00450153	0.46567
A0A369JHN1	0.00155079	0.0874765	A0A369J9D9	0.643509	1.31734	A0A369JEU1	0.0102589	0.31872
A0A369JMZ9	0.0197915	0.0749649	A0A369JQV5	0.0137768	1.94734	A0A369JM88	0.00221208	0.131398
A0A369JJ34	0.326402	1.59573	A0A369JUY2	0.487611	1.32172	A0A369JBR3	0.0189964	0.530794
A0A369JQ54	0.00596295	0.501327	A0A369JVI5	0.926161	0.974032	A0A369JLM9	0.0314067	0.440134
A0A369KGT0	0.404403	0.759827	A0A369K5D4	0.0567473	1.47837	A0A369JFC7	0.733314	1.14627
A0A369JSF4	0.00190049	1.71086	A0A369JCE5	0.00742093	1.8322	A0A369JHX8	0.007662	0.561007
A0A369JHR6	0.00925596	0.220853	A0A369JNQ6	0.273923	1.56476	A0A369KAC0	0.013736	1.6337
A0A369JD35	0.859148	0.971425	A0A369JNF8	0.0164522	4.58163	A0A369K725	0.00423655	0.136079
A0A369JU09	0.255919	0.704239	A0A369J738	0.666605	1.12356	A0A369K396	0.101715	1.92392
A0A369JNX4	0.000289734	0.265621	A0A369JDS4	0.225946	1.74267	A0A369JGM8	0.629046	1.52102
A0A369K5B3	0.000556117	0.294586	A0A369JCZ0	0.962425	0.980263	A0A369J5G0	0.0568078	1.40479
A0A369JPL8	0.000226171	0.203611	A0A369JEQ9	0.0109507	2.52368	A0A369J8J7	0.103284	0.650644
A0A369JZJ0	0.362663	0.713803	A0A369JAS2	0.223331	0.623503	A0A369K2B0	0.386279	1.28057
A0A369JXB9	0.260528	1.52355	A0A369JXB9	0.119825	2.10878	A0A369K4X6	0.013122	2.38752
A0A369JNQ6	0.161765	1.87945	A0A369JHQ3	0.01158	4.52879	A0A369KGU4	0.946662	1.01649
A0A369JBX1	0.787354	0.926155	A0A369JBU6	0.000959721	20.8057	A0A369J2R2	0.00501642	0.383226
A0A369KD73	0.136334	0.787638	A0A369JNV1	0.000369632	0.638846	A0A369K660	0.0828406	1.77621
A0A369KFU7	0.00773081	0.41359	A0A369K6Q2	0.816459	1.08983	A0A369JKF8	0.439922	0.782499
A0A369JK56	0.000595894	0.128681	A0A369JLM9	0.000693528	7.24524	A0A369JHX2	0.0582056	0.564934
A0A369JUI7	0.000203981	0.465206	A0A369JID5	0.0907985	2.58867	A0A369K4P6	0.0305135	2.23049
A0A369K7V9	0.000663353	0.0641597	A0A369JD49	0.00233835	8.06104	A0A369JUR0	0.500126	0.867322
A0A369JRF4	0.00586515	0.198515	A0A369JQJ6	0.00225632	12.5608	A0A369JSN4	0.00334347	0.610937
A0A369J2R2	0.00342631	0.441696	A0A369K701	4.59576e-05	4.88846	A0A369JC56	0.770286	1.06619
A0A369JMC7	0.000606879	0.157503	A0A369K4X6	0.00576214	0.318809	A0A369JD49	0.137024	2.51991
A0A369JNB2	0.0682915	0.453119	A0A369K662	0.993368	0.997766	A0A369IY25	0.00741834	0.359852
A0A369JDX5	0.0039631	0.0640545	A0A369JBR3	0.0837001	0.540245	A0A369JRP9	0.764433	0.944915
A0A369JF44	0.000702035	0.137798	A0A369JIM5	1.19465e-05	7.27361	A0A369KFH1	0.281416	0.789593
A0A369JCF4	0.00120502	0.0836718	A0A369KB53	0.0995418	2.48777	A0A369JGS9	0.833838	1.08679
A0A369K1E9	0.584298	1.17565	A0A369K952	0.0151895	1.55085	A0A369JTQ2	0.0311508	2.37351
A0A369K6I8	4.55508e-05	0.138964	A0A369JBY1	0.0851864	1.9329	A0A369KB35	0.0125003	0.395493
A0A369JJD6	0.000284492	0.52115	A0A369K9Z7	0.0714646	0.113396	A0A369JSF4	0.00334347	2.15061
A0A369J9U0	0.000581673	0.192735	A0A369JN14	0.00390849	3.00116	A0A369K5V4	0.0820659	1.60326
A0A369J974	0.131848	0.337142	A0A369JHX2	0.196748	1.53395	A0A369K3V2	0.00363569	0.46312
A0A369K213	0.123762	0.487452	A0A369JDW2	0.875794	0.946854	A0A369JQN6	0.0609614	0.709448
A0A369JKU6	0.740018	0.851741	A0A369K6L1	0.290081	1.47516	A0A369JII4	0.609605	1.16355
A0A369JNJ4	0.0996847	1.49546	A0A369K725	0.00502926	9.37703	A0A369JZ91	0.0248103	0.555214
A0A369J6C1	0.000358816	0.170105	A0A369JD76	0.00249598	17.3906	A0A369K5D4	0.00893902	0.0809864
A0A369JHI9	0.00105654	0.0969473	A0A369K8F9	2.01876e-05	9.76122	A0A369IZE8	0.618506	0.78428
A0A369J5I2	0.000133816	0.0372346	A0A369JL65	0.00030328	2.69004	A0A369JEX3	0.034939	1.82859
A0A369J479	0.0347041	0.329167	A0A369JUT5	0.00156351	0.250328	A0A369JZK2	0.00709177	1.59773
A0A369JCQ7	0.000259547	0.0369532	A0A369J5G0	0.0569873	1.41918	A0A369JKH2	0.970451	1.01619
A0A369KDS1	0.00155652	0.441401	A0A369JGT9	4.06396e-05	21.8323	A0A369K7A6	0.655889	1.06284
A0A369K0J1	0.000512636	0.0122924	A0A369JVQ6	0.105981	0.601466	A0A369JFD6	0.0308851	1.69298
A0A369K4M5	0.0201192	0.475464	A0A369JIY3	3.8032e-05	5.1351	A0A369JIX2	0.00999951	0.197744
A0A369JNQ7	0.00539354	0.600763	A0A369K2J9	0.0308697	0.263698	A0A369JCZ6	0.114219	0.400313
A0A369K8X8	0.436596	1.1804	A0A369JH00	0.00428622	1.72259	A0A369K701	0.0476738	3.3358
A0A369J9J3	0.00168684	0.258883	A0A369JEZ9	0.15706	1.89197	A0A369K497	0.0372189	0.484846
A0A369K7W0	0.0317251	0.48534	A0A369J1Z2	0.00148155	12.9242	A0A369JFL7	0.000307031	0.214012
A0A369JZX9	0.237986	2.15281	A0A369JIK8	0.0845611	1.36653	A0A369JH00	0.740004	1.06681
A0A369K8J5	0.0283213	0.164837	A0A369JG01	1.13271e-05	4.41897	A0A369JU20	0.00161822	0.446281
A0A369KFJ0	9.89703e-05	0.249626	A0A369KCZ8	0.00424367	12.803	A0A369KBQ2	0.0316926	0.399029
A0A369JCV1	2.36323e-05	0.406233	A0A369J8J7	0.00282968	6.35085	A0A369JDW9	0.294363	1.26799
A0A369KCB7	0.00780669	0.370369	A0A369JQN2	0.176979	1.57192	A0A369K1K3	0.000314967	3.06486
A0A369JUA6	0.239846	1.37796	A0A369JLH3	0.000484404	32.4403	A0A369JKF9	0.206871	0.497508
A0A369K1Z7	0.00663616	0.0979626	A0A369JC32	0.273118	1.81665	A0A369JZY7	0.598393	1.12238
A0A369JJT5	0.83688	0.949683	A0A369JX65	0.0160802	8.37105	A0A369JBS0	0.952482	0.983803
A0A369K1H7	0.00450093	0.0996165	A0A369JWA4	0.0106746	2.31456	A0A369JF28	0.00394382	0.453123
A0A369K3C7	0.0201192	0.671759	A0A369K7Q9	1.53784e-06	27.5652	A0A369JZR5	0.0105539	0.541964
A0A369JBY1	0.0398465	3.05017	A0A369K108	0.904671	0.970516	A0A369K5D3	0.402669	0.572638
A0A369J8B8	0.426388	0.936531	A0A369JZ90	0.0778981	8.65837	A0A369JMM2	0.0418834	0.504628
A0A369JGA5	0.0059926	0.516859	A0A369K771	0.0567473	1.71021	A0A369KD73	0.0511859	0.757343
A0A369JFV3	0.000160727	0.297406	A0A369JZY7	0.237574	0.747145	A0A369JFT9	0.56427	0.769528
A0A369K0H7	0.0020443	3.21086	A0A369K9B2	0.808963	0.89349	A0A369JCC3	0.00975173	0.632542
A0A369JQ42	0.00218295	3.0553	A0A369KBN9	0.888289	0.975193	A0A369JRS9	0.221435	1.25819
A0A369J7U0	0.000615575	0.311271	A0A369J9N3	0.670918	0.920841	A0A369JVA4	0.483467	0.916451
A0A369JPY8	0.129243	0.684204	A0A369JDK1	0.00738995	10.8289	A0A369JDK1	0.0727671	0.439368
A0A369K377	0.00106203	0.240464	A0A369JNJ4	0.839499	0.971198	A0A369JBY1	0.0151928	1.57803
A0A369K261	0.00889619	0.434781	A0A369JNY3	0.00282058	1.58952	A0A369KCZ8	0.0216315	0.590211
A0A369JU92	0.00824486	1.32522	A0A369JND3	0.101346	0.566602	A0A369J7L7	0.00694961	0.407503
A0A369JUM7	0.0134962	0.396645	A0A369J720	0.00142094	7.47906	A0A369J8L3	0.257947	1.28479
A0A369JF14	0.000665904	0.0589807	A0A369JC56	0.000354289	2.72499	A0A369JI35	0.920875	0.972487
A0A369KAN0	0.00961604	0.216974	A0A369KB35	0.00135398	9.67357	A0A369K051	0.0317131	0.712891
A0A369J775	0.100063	1.52754	A0A369KB48	0.00268216	0.566118	A0A369J705	0.0373269	0.424594
A0A369J2P6	0.109586	0.580836	A0A369JBS0	0.00702239	0.295404	A0A369JNQ7	0.964505	0.989949
A0A369K7M9	0.0162506	0.314182	A0A369J837	0.000460115	63.5835	A0A369KGH1	0.22283	1.65494
A0A369JDL9	0.00350628	0.0262402	A0A369J757	0.00142749	0.209914	A0A369K7L6	0.848259	1.05011
A0A369JUP6	0.000313524	0.100603	A0A369KH81	0.00119975	6.59105	A0A369J1Z2	0.881998	0.922575
A0A369JT25	0.00141025	0.0713083	A0A369JFD6	0.200487	1.73582	A0A369JS60	0.0296592	0.503564
A0A369JR19	0.00132791	0.242942	A0A369K1I4	0.000193304	17.7371	A0A369JM22	0.000120554	0.0827295
A0A369JT87	0.0015572	0.21946	A0A369JQH6	0.0157435	19.397	A0A369JX93	0.909899	1.02332
A0A369K5Q8	0.0356825	3.02707	A0A369JMV1	0.00156351	6.15614	A0A369JNT5	0.030944	1.69539
A0A369IY90	0.0579698	0.659522	A0A369JZG8	8.59084e-05	6.43607	A0A369IXT8	0.0367671	1.43156
A0A369K2M8	0.0114539	0.246185	A0A369KBQ2	0.000105903	62.0222	A0A369JP43	0.309206	0.698878
A0A369JMT3	0.0197999	0.50876	A0A369JXT6	0.00208337	18.0814	A0A369K6Q2	0.398366	0.825952
A0A369KG83	0.00139888	0.034555	A0A369JIW6	4.58473e-05	0.271335	A0A369K1I6	0.209364	0.690953
A0A369JW94	7.0794e-05	0.260925	A0A369JC65	0.00265118	30.5541	A0A369JNQ6	0.60555	1.20111
A0A369JP74	0.876444	1.04239	A0A369JII4	0.00204035	28.6893	A0A369K1I4	0.00326527	0.165133
A0A369KDN6	0.0157552	6.14333	A0A369K1I6	0.000725314	3.73072	A0A369JBP5	0.720532	0.933432
A0A369JEM7	0.000300659	0.0758515	A0A369JGP9	3.87621e-05	27.6595	A0A369J369	0.107567	1.29804
A0A369J993	0.001371	0.255817	A0A369JGJ2	0.00593001	4.0703	A0A369JG58	0.0694369	2.31568
A0A369JNA8	0.56472	0.911683	A0A369JKF8	0.000386144	13.4662	A0A369J5N1	0.667926	1.51728
A0A369J5U9	0.00432707	0.143917	A0A369JU20	7.72618e-05	60.8191	A0A369K9B2	0.0832919	1.21243
A0A369JSY8	0.00753092	0.0735873	A0A369J2R2	0.266313	1.15257	A0A369JIW3	0.489395	1.38818
A0A369K4E4	0.23611	1.28148	A0A369JPM3	0.128198	0.786025	A0A369K2V9	0.438571	0.912197
A0A369JQ26	0.0640443	2.42851	A0A369JSF4	0.0418509	0.795524	A0A369K8Y8	0.574061	0.849338
A0A369JUY2	0.000665276	0.226234	A0A369J6N0	0.000362254	12.3997	A0A369JNY3	0.0234076	1.65932
A0A369JUL5	0.0031192	3.54974	A0A369JNI9	0.0987424	2.35696	A0A369J7K7	0.947343	1.01584
A0A369JFB8	0.185589	0.114343	A0A369K332	0.453491	1.216	A0A369JQH5	0.352145	1.27443
A0A369JHU7	1.44678e-05	0.137959	A0A369JNQ7	0.0741904	0.606862	A0A369KIJ2	0.201406	1.69807
A0A369KEJ7	0.0151186	0.570771	A0A369JR69	0.000725314	9.71894	A0A369J6N0	0.0170869	1.49887
A0A369JFC7	0.982206	1.00878	A0A369KB85	0.0280382	0.254857	A0A369JQU2	0.165176	1.39656
A0A369KB53	0.773465	0.91721	A0A369K2V9	0.121919	3.02533	A0A369JID5	0.22283	1.50362
A0A369JW66	0.0244425	0.218299	A0A369JFL7	0.00288847	11.9952	A0A369J0G4	0.000381497	0.320875
A0A369J8G0	4.12246e-06	0.171633	A0A369J3U0	0.000556651	23.074	A0A369K0C0	0.00101576	0.343786
A0A369JHH6	0.0351115	5.35713	A0A369KAB6	0.229318	1.6266	A0A369JIW6	0.758485	1.02123
A0A369JQW9	0.0236774	0.668719	A0A369JEC1	0.0360393	1.81803	A0A369J7J6	0.977339	0.981431
A0A369IYM9	6.25976e-06	0.189168	A0A369K907	0.000939165	3.70213	A0A369K2J9	0.249764	0.659458
A0A369IYQ5	0.0830453	0.492969	A0A369JBD9	0.000141649	3.94259	A0A369K236	0.104934	0.582163
A0A369J5G0	0.0132151	1.99366	A0A369JG58	0.681977	1.22845	A0A369KGA9	0.35569	1.39313
A0A369JDE1	5.833e-05	0.129508	A0A369J4G8	0.00427033	7.52104	A0A369JQV5	0.113755	0.480006
A0A369J7L2	0.000327586	0.0842026	A0A369JI06	0.00677095	5.74143	A0A369JVB1	0.109455	2.08617
A0A369J2C9	0.0327076	0.517059	A0A369K660	0.192703	1.93296	A0A369K5F2	0.194748	0.580247
A0A369K294	0.620112	0.932962	A0A369KD73	0.802599	1.04	A0A369K2W1	0.00419262	0.567382
A0A369JVA4	0.375363	1.52227	A0A369J8M5	0.041942	0.538963	A0A369K1T9	0.202846	1.3848
A0A369JC20	0.0755786	0.316821	A0A369K0C0	0.000270217	58.1788	A0A369JA34	0.130461	1.40716
A0A369JVV5	0.0778628	0.750525	A0A369J8I9	8.96512e-05	16.4408	A0A369JFZ1	0.0344761	0.179934
A0A369J2T0	0.00879243	0.287746	A0A369K051	0.00196323	0.310672	A0A369JZJ9	0.00735086	1.52715
A0A369JPZ0	0.000304406	0.126569	A0A369K885	0.00705166	27.7499	A0A369K771	0.104699	0.582629
A0A369K080	1.38562e-05	0.148459	A0A369K0I0	0.159352	0.700728	A0A369KCB7	0.0416657	0.558297
A0A369K0F4	0.000190232	0.0997908	A0A369J818	0.421254	1.2898	A0A369JGP9	0.312424	1.23483
A0A369J2A5	0.000258804	0.294239	A0A369JSJ9	0.000118941	11.0417	A0A369JSJ9	0.0530038	0.48872
A0A369K592	0.0340782	0.485354	A0A369J9E8	0.012689	2.11043	A0A369K174	0.225922	0.72947
A0A369JH00	0.00714002	1.83768	A0A369JM22	0.000886293	8.63052	A0A369JFQ9	0.521325	1.10283
A0A369JJF5	8.05123e-05	0.110097	A0A369J7B8	0.00286956	13.2953	A0A369JPL9	0.825774	1.12658
A0A369JG17	0.741346	0.953296	A0A369JVA4	0.310434	1.66106	A0A369JEU8	0.0126414	0.367089
A0A369JJ99	0.00977282	0.133393	A0A369K236	0.00105909	2.15087	A0A369JX34	0.00161822	3.67362
A0A369JJE2	0.224762	0.764299	A0A369J696	2.13172e-06	17.988	A0A369J757	0.0225953	1.62874
A0A369J7A4	0.00179945	0.0844339	A0A369J559	0.000190746	4.46582	A0A369JZ90	0.546585	1.26655
A0A369JXH4	0.0858208	1.92245	A0A369K289	0.00173364	12.8301	A0A369K7B1	0.496774	1.19562
A0A369JG86	0.121834	3.1434	A0A369K5Q4	0.001187	3.81396	A0A369JT12	0.00144842	0.159874
A0A369JGN9	0.0826957	0.710657	A0A369K396	0.0001768	6.06752	A0A369JR60	0.0166534	0.256396
A0A369JBT1	0.144727	0.65653	A0A369JR50	0.000102271	4.02122	A0A369JPG9	0.980544	0.992947
A0A369JBD0	3.91803e-05	1.91018	A0A369KCL0	0.00087028	47.1	A0A369J3Y2	0.172007	1.20624
A0A369JV75	0.841969	0.955726	A0A369JC72	0.218737	1.3481	A0A369JVH7	0.971118	1.00819
A0A369J625	0.27874	1.6776	A0A369JRS9	4.4692e-05	6.00837	A0A369JHQ3	0.144278	0.644162
A0A369JRX6	0.293002	0.306714	A0A369K4L7	0.00129476	11.6846	A0A369KA85	0.0125431	0.542618
A0A369JHZ7	5.69404e-05	0.276043	A0A369JZ75	0.0353739	1.21663	A0A369K047	0.0617257	1.33098
A0A369JQV5	0.788483	0.934735	A0A369J8E8	0.000369632	2.51357	A0A369K5Z3	0.610984	0.87394
A0A369JGY6	0.00342631	0.461744	A0A369K3K8	0.628398	1.13393	A0A369JF39	0.0697931	1.64951
A0A369K6L1	0.275657	0.731543	A0A369JPG9	0.00148155	3.71574	A0A369J564	0.0476558	0.675509
A0A369JDB4	0.139948	0.733322	A0A369K119	2.55555e-05	6.51241	A0A369JJK1	0.847775	1.05559
A0A369J7J6	0.107043	1.52043	A0A369JN26	2.42264e-06	4.46726	A0A369K0D8	0.0754049	1.65603
A0A369K658	0.0602906	5.45274	A0A369J9Q8	0.0016135	10.5978	A0A369JWK3	0.864361	1.06906
A0A369JDB3	0.645472	1.09533	A0A369K1V7	0.0129731	1.68181	A0A369K885	0.0163051	0.197719
A0A369JAF9	0.073572	0.669875	A0A369K2W1	0.0451734	5.13731	A0A369K7V5	0.321242	0.622926
A0A369JQE5	0.900539	0.963343	A0A369K882	0.00050436	0.451232	A0A369JN26	0.0142687	0.407874
A0A369J6L9	9.89703e-05	0.293658	A0A369JT12	0.000590784	5.00908	A0A369J3U0	0.0698982	0.439506
A0A369K660	0.0914563	3.43334	A0A369JQU2	0.00257127	0.226825	A0A369JX36	0.0717486	2.5796
A0A369JZ75	0.00137782	1.94565	A0A369KDP3	0.700853	0.958885	A0A369JCH4	0.144391	1.28437
A0A369JNY3	0.000556117	2.63754	A0A369J7L7	2.82881e-05	29.0664	A0A369JK15	0.520983	1.28918
A0A369K6Q2	0.751964	0.900144	A0A369K4J4	0.00503078	2.10368	A0A369JZL4	0.0696867	0.684785
A0A369J463	0.684878	1.12553	A0A369K2B0	0.0227393	0.209109	A0A369KGA5	0.00385153	1.84702
A0A369JH57	0.266096	0.696902	A0A369JVF8	0.046497	0.436002	A0A369JHT8	0.43881	0.901242
A0A369J8P4	0.00838133	2.0953	A0A369JC36	0.0087675	2.39643	A0A369JC65	0.292048	0.633511
A0A369JDS5	0.0130767	0.357488	A0A369JEX3	4.06396e-05	39.3141	A0A369JR44	0.000503224	0.211748
A0A369JVF9	0.0130534	0.112666	A0A369K7Z1	0.00142094	14.2803	A0A369K4J4	0.421033	0.866474
A0A369K2N9	0.273926	1.46261	A0A369K9Y1	0.845836	0.949233	A0A369JYY6	0.101386	1.72105
A0A369JDW7	0.0077736	0.436403	A0A369JL71	0.0314476	1.87424	A0A369JMU8	0.676699	1.17397
A0A369K0A7	0.00265595	0.318764	A0A369JMQ9	4.50371e-05	203.07	A0A369KE31	0.00807648	0.621505
A0A369JVH1	0.285694	0.782783	A0A369K789	0.188062	1.58393	A0A369JYU1	0.216717	1.29669
A0A369JAC1	0.0446628	1.30592	A0A369K567	0.133939	0.769035	A0A369J7D5	0.203981	0.736077
A0A369J929	0.481379	1.18853	A0A369JJI6	0.528913	1.10898	A0A369KBI6	0.0105389	3.13475
A0A369JBD7	0.190487	0.572203	A0A369KCB7	0.0579541	0.663392	A0A369JC36	0.0889191	0.728733
A0A369K0E4	0.00330813	0.428851	A0A369J7D5	0.0357719	0.658412	A0A369J7B8	0.0317672	0.759653
A0A369J4V0	0.596288	1.38039	A0A369JVX3	0.000121571	0.243359	A0A369J8I9	0.0651873	0.200075
A0A369JP16	0.0637458	1.81033	A0A369JRX7	3.80281e-05	6.63292	A0A369J3T9	0.0062073	1.45675
A0A369J2T2	0.674157	1.06963	A0A369JWK3	0.0400961	0.199517	A0A369JE84	0.00785434	1.50947
A0A369JCE5	0.0138485	1.5953	A0A369K0L9	0.0162677	0.283368	A0A369JZ75	0.0152765	1.59921
A0A369JT34	5.40462e-05	0.340716	A0A369K2N9	0.0873951	1.60014	A0A369JCZ0	0.0642377	0.467543
A0A369K1K9	0.00108961	0.365346	A0A369JVG8	5.23475e-05	2.80414	A0A369KH81	0.0192038	2.1722
A0A369KAB6	0.103485	2.48181	A0A369JFQ9	0.000175998	2.31098	A0A369JX45	0.844915	1.06165
A0A369JBD4	0.000255317	0.0270521	A0A369J9S5	0.68812	0.909095	A0A369K068	0.839944	0.96521
A0A369J6D0	0.014361	1.86732	A0A369KA26	0.00559574	21.9245	A0A369K4I0	0.148318	0.727193
A0A369J8C7	0.000275901	0.236443	A0A369JX66	0.0466308	3.0253	A0A369JXH4	0.239112	1.76619
A0A369JVN3	0.000136916	0.175123	A0A369J5V5	0.130342	0.533828	A0A369KGT0	0.141735	3.51811
A0A369JL94	0.0126686	0.5323	A0A369JKI8	0.286935	4.87971	A0A369J2P6	0.0329126	0.289833
A0A369J9S5	0.205718	1.4378	A0A369J7G7	0.00038529	12.0706	A0A369JZX8	0.946662	0.979479
A0A369KCF4	0.00956638	0.14281	A0A369JG72	8.03945e-05	15.2049	A0A369JBD9	0.0935276	1.78189
A0A369J761	0.000495925	2.47344	A0A369K3V2	0.105365	0.615828	A0A369JNJ4	0.0857727	1.53981
A0A369JKC6	0.00195367	0.120551	A0A369JXR8	0.00195571	2.33406	A0A369J818	0.0373208	1.569
A0A369KE72	0.0030018	0.317212	A0A369JWQ5	0.00615907	0.523992	A0A369JWQ5	0.0070258	1.68901
A0A369J5E3	0.00304485	0.564693	A0A369K4I0	0.00197449	4.33594	A0A369K882	0.00100805	0.381753
A0A369J4T9	0.0767575	1.92395	A0A369JT35	0.000108684	3.02827	A0A369K289	0.341209	1.21192
A0A369JJG7	7.19558e-05	0.129281	A0A369K5W0	0.006143	3.8544	A0A369K734	0.327587	0.751051
A0A369JIX2	0.0221602	0.533866	A0A369KDS1	0.0290987	0.648092	A0A369JQG5	0.275584	0.809908
A0A369JGW2	0.466712	1.50151	A0A369J4T7	0.000156297	5.7634	A0A369JAS2	0.0720838	0.438148
A0A369JKX4	0.151849	1.62759	A0A369K020	0.000278415	35.1268	A0A369JLI4	0.00107789	0.120686
A0A369J3T0	0.00812237	0.231413	A0A369JFZ1	0.00579726	10.7682	A0A369KC16	0.0806887	1.75382
A0A369JGM7	0.21195	1.36191	A0A369JXJ2	0.000912733	12.2757	A0A369JRX6	0.55635	0.590781
A0A369K225	0.000194481	0.267241	A0A369J5D4	0.000149452	15.3024	A0A369J3R4	0.0421468	2.51299
A0A369K5D4	0.00490908	0.119728	A0A369K0K2	0.124763	0.657673	A0A369IY85	0.0286189	0.652217
A0A369JYE8	5.88873e-06	0.182634	A0A369J2P6	0.172479	2.00404	A0A369JV75	0.0690954	0.601909
A0A369JFT0	0.00011299	0.142199	A0A369JI35	0.000837625	6.2207	A0A369JGJ3	0.0424476	0.445027
A0A369K8U0	0.000301601	0.195163	A0A369J4H3	0.000314153	3.68638	A0A369K1E9	0.0999747	1.40435
A0A369JS60	0.279278	1.4667	A0A369JQD1	0.00113816	21.5835	A0A369J9Y2	0.544862	0.947924
A0A369KGY7	8.55178e-05	0.123203	A0A369JE84	0.0489836	1.5417	A0A369J956	0.0404166	0.594839
A0A369JNS6	0.131848	1.71369	A0A369K855	0.000797829	0.286771	A0A369JBX1	0.0203354	2.15433
A0A369JLT0	0.00361374	0.374392	A0A369JI51	0.0135292	1.46626	A0A369JKI8	0.687083	1.16199
A0A369JUK6	5.40462e-05	0.21729	A0A369JAT5	3.71276e-05	7.63736	A0A369J4H3	0.251107	0.810872
A0A369K0R7	5.09131e-06	0.248614	A0A369K1M4	0.000294506	6.06324	A0A369JDY8	0.0567341	2.04536
A0A369JE84	0.0140191	2.32715	A0A369K7B8	0.000354289	17.3561	A0A369JL71	0.294363	0.87625
A0A369K357	0.0629147	0.458371	A0A369J543	0.00213505	3.26591	A0A369J6U0	0.908461	1.0158
A0A369JMX5	0.00111145	2.93175	A0A369JUR0	0.000198191	12.5658	A0A369K020	0.0876558	0.621543
A0A369JU37	0.607177	1.06319	A0A369JD79	0.0165458	6.42454	A0A369K935	0.012044	2.13601
A0A369JUV8	0.217077	0.0236394	A0A369KAM4	0.0047349	5.95821	A0A369JVL8	0.0227781	2.19684
A0A369K4U8	0.237208	0.664556	A0A369K906	0.00496439	3.39689	A0A369JF77	0.00360548	0.348089
A0A369JYN3	0.22563	1.22234	A0A369KBI6	2.75663e-05	4.12567	A0A369K3K8	0.0478338	1.87444
A0A369JM09	2.62182e-05	5.33733	A0A369JX34	0.00165252	0.325322	A0A369JAG4	0.0641282	2.5936
A0A369K448	0.00753092	0.523563	A0A369JZR5	0.0147928	10.4808	A0A369KBH9	0.636105	1.14077
A0A369JFP5	0.915186	1.01786	A0A369K5V5	0.00511739	2.71887	A0A369J6B6	0.18926	1.19161
A0A369JMD8	7.75369e-05	0.0483539	A0A369K068	0.000830432	2.53514	A0A369JXA1	0.275876	0.678233
A0A369JW51	0.474089	0.870011	A0A369JNS6	0.189559	1.39435	A0A369JXJ2	0.0167885	0.30225
A0A369J5G2	0.00966032	0.151968	A0A369JK15	0.100657	1.60738	A0A369KCW9	0.000242698	0.25663
A0A369J9S9	0.00561637	0.23966	A0A369JSI5	0.184205	0.342379	A0A369J1E2	0.000120554	0.0912036
A0A369K433	0.00273838	0.12283	A0A369J0G4	0.993861	1.00133	A0A369K7W7	0.0067873	0.210669
A0A369K033	0.203538	1.46536	A0A369KC42	0.0183075	3.59431	A0A369K5V5	0.629196	1.3003
A0A369JC24	0.0241105	1.61784	A0A369JGJ3	3.33795e-05	13.6259	A0A369JQ26	0.0386515	3.12993
A0A369JTT8	9.63531e-05	6.94749	A0A369KBL7	0.000314153	15.2593	A0A369K4M5	0.46343	0.852968
A0A369JJ95	0.755904	0.876224	A0A369K5R2	0.00273741	3.47189	A0A369K3M9	0.108725	0.792683
A0A369IZM0	0.100137	0.534633	A0A369K4M5	0.0357973	0.557422	A0A369K4D9	0.215662	1.41434
A0A369J4I9	0.103356	0.186115	A0A369IYH2	0.00105909	6.40413	A0A369K7H2	0.0201251	1.38443
A0A369K244	0.0179047	0.773448	A0A369K3K5	0.0232151	2.75657	A0A369K5W0	0.0857727	0.37102
A0A369KHU0	6.46045e-05	0.111612	A0A369J4I9	0.072516	0.16803	A0A369K3K5	0.48229	0.553266
A0A369JNP8	0.00722851	0.512123	A0A369JP20	0.00052986	14.9986	A0A369K484	0.553781	1.0878
A0A369JXM0	0.00123661	0.306181	A0A369JS35	0.00305701	4.40849	A0A369K7B8	0.37017	0.849182
A0A369JHX2	0.574989	0.866582	A0A369K1E9	0.479254	0.837146	A0A369JR83	0.590619	1.14731
A0A369JJD2	0.000562609	0.0765798	A0A369JM24	0.0201254	0.222147	A0A369K7Q7	0.153312	1.4305
A0A369K7G8	3.79018e-05	0.0749558	A0A369JV75	0.123439	1.58782	A0A369J712	0.724585	0.925142
A0A369JR82	0.963832	0.982465	A0A369JFG2	0.520425	1.24363	A0A369K5V8	0.486108	1.09545
A0A369K648	0.013148	0.385814	A0A369KCN9	0.000506435	12.3449	A0A369JBY3	0.291061	1.6704
A0A369J5V5	0.146257	0.505248	A0A369K2X8	0.00196323	4.15832	A0A369JM24	0.102472	1.73812
A0A369JER3	0.00148589	0.286059	A0A369JF39	0.000118941	11.3129	A0A369K789	0.16663	3.38342
A0A369J1V1	0.178852	1.10399	A0A369K7V2	0.00786576	8.16778	A0A369K6C1	0.0342568	0.796983
A0A369K8E9	0.611317	0.909049	A0A369K4H1	1.92931e-06	14.8404	A0A369JNS6	0.56427	1.22903
A0A369JFN0	0.270531	0.785997	A0A369JLF5	8.37151e-05	53.7078	A0A369JJD6	0.865001	1.02734
A0A369JNX3	0.0724431	0.448152	A0A369KFM4	0.485252	0.873079	A0A369K8F9	0.686495	1.20717
A0A369JY90	0.00541358	0.510436	A0A369JJS6	0.000179309	4.37042	A0A369JWU7	0.173559	1.75336
A0A369JI51	0.0206993	1.68995	A0A369JFC7	0.721381	0.88005	A0A369JVX3	0.671771	0.959901
A0A369JAV4	0.00166754	0.19255	A0A369JWU7	0.441699	1.23001	A0A369J8M5	0.152741	0.770758
A0A369JZB8	0.00507408	0.42474	A0A369J6Z6	0.883159	1.06086	A0A369K1V7	0.546033	1.08325
A0A369KBL2	0.0324677	1.81426	A0A369JVL8	0.00121383	11.8066	A0A369KB16	0.370688	1.10993
A0A369JVY3	0.0277022	2.24759	A0A369JVS3	0.0484116	1.93221	A0A369K845	0.00571619	2.54626
A0A369J5W9	0.0421224	1.30086	A0A369K248	0.00593204	4.03865	A0A369J4W6	0.0272134	2.04522
A0A369K0G2	0.0185108	0.452415	A0A369JDC7	0.00200327	7.97266	A0A369JFC9	0.138672	0.544884
A0A369JJI6	0.0448635	1.47306	A0A369JZX8	5.01762e-06	98.1927	A0A369J716	0.974144	0.991252
A0A369JLN8	0.79623	1.08395	A0A369JQF7	7.05738e-05	8.29805	A0A369K2K6	0.634717	1.08554
A0A369KAG6	0.00384492	0.543572	A0A369J8A9	0.339266	1.29564	A0A369JHS4	0.00663758	2.1886
A0A369JTW7	0.000398514	0.461863	A0A369KFU7	0.0154998	0.480477	A0A369J1V1	0.214546	0.877291
A0A369KCF5	0.00823132	1.78902	A0A369JPJ1	0.00259072	3.33021	A0A369J209	0.00681743	0.423574
A0A369JQB4	0.801491	1.06146	A0A369K5C3	0.000143003	20.5666	A0A369JS35	0.531218	1.24769
A0A369K8Y7	0.000268941	0.46748	A0A369K542	0.00119061	8.64959	A0A369K855	0.142913	1.21528
A0A369JEF1	0.143869	7.607	A0A369KEU6	0.0182139	1.76167	A0A369JQD1	0.00701011	0.434592
A0A369JPU8	0.243314	3.02125	A0A369J6T7	4.1598e-05	8.11931	A0A369JA64	0.0276268	1.79769
A0A369JC56	0.000307744	2.90536	A0A369J956	0.00526683	2.55671	A0A369JUV2	0.169692	2.73732
A0A369K836	0.0275912	0.750151	A0A369JX45	0.00357461	0.197458	A0A369JPH6	0.00201907	2.19538
A0A369JDH2	0.0195873	0.775016	A0A369JGA5	0.085459	0.707388	A0A369J748	0.0277466	1.86932
A0A369JP73	0.000944751	0.13969	A0A369JDB3	0.128469	1.50496	A0A369JTN5	0.0143996	0.405705
A0A369JL71	0.0482943	1.6423	A0A369JCV1	0.0412947	0.425375	A0A369K542	0.0868011	1.11556
A0A369K137	0.0211803	3.90511	A0A369K845	1.92574e-05	8.97704	A0A369JPN0	0.217031	1.32084
A0A369K3K8	0.0699505	2.12547	A0A369JI12	0.0720205	1.16843	A0A369K5C3	0.000912605	0.38973
A0A369JSB6	0.000286408	0.272185	A0A369K4T7	0.00457125	0.161277	A0A369JMM0	0.0131627	2.20514
A0A369K6A6	0.0050306	0.121768	A0A369JNV0	0.017514	8.12863	A0A369K5A8	0.912935	1.03903
A0A369K771	0.986802	0.996419	A0A369K5E6	0.0354957	3.96194	A0A369J543	0.0420343	0.386967
A0A369KAR5	0.00773081	0.659241	A0A369K5A8	0.000594984	26.8182	A0A369KC42	0.0751314	1.88967
A0A369K0T9	0.00639627	5.09577	A0A369JPN0	0.00287789	0.263495	A0A369JL65	0.00316855	0.354041
A0A369JSS7	0.0011153	30.5001	A0A369JFC9	0.00370519	4.43439	A0A369JZG8	0.298538	1.58332
A0A369K9Y1	0.073689	0.65616	A0A369JN30	4.50371e-05	3.02432	A0A369K611	0.00144842	0.431634
A0A369JUQ7	0.00220626	20.4277	A0A369KBH9	0.0258753	0.466828	A0A369JGM2	0.232951	1.36794
A0A369JV11	6.39969e-05	0.203005	A0A369J462	0.01825	0.183612	A0A369J3E7	0.0270599	0.721877
A0A369JX88	0.415015	1.49528	A0A369J1V1	0.0211219	1.25841	A0A369JPJ1	0.11102	1.5463
A0A369JPL9	0.0541089	4.20018	A0A369JLE7	0.041035	2.01498	A0A369JUN5	0.308697	1.17324
A0A369J9M1	0.00050414	0.167256	A0A369JL56	0.00489129	2.74311	A0A369J715	0.148318	0.656567
A0A369JKU8	0.637595	0.837139	A0A369JYY6	7.82617e-06	51.136	A0A369JS84	0.052544	1.5533
A0A369K7N2	0.415086	0.811491	A0A369K3M9	0.00444607	0.429447	A0A369KDS1	0.0189964	0.681077
A0A369KCW9	0.000704991	0.382371	A0A369J4A2	0.00221122	0.188577	A0A369JZK0	0.0627833	0.57844
A0A369KEU6	0.00339179	2.45811	A0A369JVR5	0.85419	1.14667	A0A369K248	0.0119322	0.528387
A0A369JFY1	0.648935	1.18914	A0A369JJG7	0.62688	0.790747	A0A369J7G7	0.0334649	0.254174
A0A369JB79	0.0308744	0.549288	A0A369K8H0	0.000161237	12.9708	A0A369JJU6	0.239112	1.40712
A0A369JX72	0.000284492	0.0755823	A0A369JBX1	0.00591234	0.429904	A0A369K119	0.0105389	0.246569
A0A369JK15	0.00820854	2.07221	A0A369JT46	0.000458081	3.98961	A0A369JFG2	0.120806	0.66203
A0A369K3F3	0.0149928	2.45744	A0A369JRN9	0.126476	1.37762	A0A369J559	0.641427	0.851571
A0A369JYC5	0.0138849	0.552109	A0A369JTR1	0.000912733	6.51376	A0A369JWW4	0.228509	1.49571
A0A369K1H6	0.000419018	0.288714	A0A369JL50	0.914953	0.976325	A0A369K9D3	0.687968	1.09722
A0A369JXY3	0.066099	0.597243	A0A369JGM2	0.0296087	0.363878	A0A369JX66	0.0206029	0.709454
A0A369J218	0.000154399	9.65263	A0A369K4E4	0.00198784	0.419656	A0A369JLE7	0.711671	0.953424
A0A369JCS7	0.00023165	0.214202	A0A369K7L6	0.000195547	4.30123	A0A369K3C7	0.486985	1.18167
A0A369JDF2	0.0061274	3.52476	A0A369JG17	0.00587921	0.593416	A0A369KCN9	0.0265744	0.399541
A0A369JC17	0.000752343	0.187335	A0A369JYQ0	0.000939165	4.37661	A0A369J6T7	0.00407431	0.269665
A0A369J818	0.124717	2.02371	A0A369JPZ9	4.28748e-06	3.57195	A0A369KAA6	0.778804	1.06946
A0A369KAZ1	0.550921	1.38344	A0A369JKH2	3.55567e-05	6.65634	A0A369JWU1	0.125273	1.80211
A0A369JWA4	0.00167985	3.3581	A0A369JF26	0.00100928	20.6338	A0A369K2X8	0.398974	0.894381
A0A369JN75	0.0782967	0.305747	A0A369J3R4	0.0322575	2.10589	A0A369JVV5	0.123696	1.92741
A0A369JTX3	0.00838646	2.27716	A0A369JTG5	0.0134463	1.71404	A0A369K4U8	0.436105	1.21314
A0A369K6M0	0.000332738	5.02227	A0A369J2Q1	8.93884e-05	8.24699	A0A369KEU6	0.261356	1.39533
A0A369J5K1	0.0104419	0.702869	A0A369JU46	0.00134187	7.19419	A0A369K2N9	0.837727	0.914053
A0A369JBQ9	0.000581613	0.138793	A0A369KDP6	2.12923e-05	3.60483	A0A369JI51	0.535175	1.15256
A0A369K254	0.0224557	2.35628	A0A369KE11	0.781138	0.958269	A0A369JIT1	0.170905	1.77242
A0A369JCE1	0.0049987	0.643772	A0A369KA85	0.00538262	2.56132	A0A369JDC7	0.0264525	0.268672
A0A369JIB4	0.00584301	1.75328	A0A369JCR2	0.0754904	0.397708	A0A369J4T7	0.463881	0.898771
A0A369K6L3	0.00233968	0.103994	A0A369K294	0.00883804	0.475044	A0A369JP39	0.548099	1.06713
A0A369JJQ9	0.737633	1.11107	A0A369KAB3	0.224541	0.740139	A0A369JYC8	0.921886	1.02115
A0A369JL29	0.0716048	1.63001	A0A369K6M8	0.0275208	2.67272	A0A369JBD7	0.241825	0.565078
A0A369K6S2	0.121998	2.13888	A0A369KCW9	0.116283	1.48997	A0A369J4A2	0.00548755	2.51311
A0A369JKF9	0.078838	1.32776	A0A369JKX4	0.702254	1.0989	A0A369JY22	0.00395372	1.88876
A0A369K789	0.000102472	5.35911	A0A369K0J6	3.36928e-05	13.1669	A0A369JL95	0.908461	1.07073
A0A369JWU7	0.0372726	2.15664	A0A369JAK1	0.00196323	6.15115	A0A369JUV3	0.964505	1.02594
A0A369K696	0.261625	0.68038	A0A369K8E9	0.146332	0.310322	A0A369JG17	0.0175576	1.60646
A0A369K5V4	0.000949741	5.48766	A0A369JUN7	0.0135367	0.280955	A0A369JP20	0.0138346	0.29707
A0A369JJI7	0.000314289	9.17298	A0A369K0G5	0.0299459	4.74137	A0A369JDB4	0.388381	0.846219
A0A369J9B5	0.129045	0.751021	A0A369K359	0.014398	5.03088	A0A369JVS3	0.0367928	2.90842
A0A369JRV1	0.381315	0.580095	A0A369J6C6	0.000705751	4.54934	A0A369K3G1	0.0530327	0.708951
A0A369JLH4	0.000438659	7.23066	A0A369JP87	0.262579	1.46597	A0A369K4X5	0.10786	3.45384
A0A369K093	0.00311616	0.209591	A0A369KAA9	0.000206611	16.0362	A0A369K5P6	0.352819	1.17834
A0A369JCX5	0.729617	0.926576	A0A369JFB5	0.00208337	1.7436	A0A369K3R0	0.418399	0.894153
A0A369K4B5	0.000216783	0.0684092	A0A369K859	0.00155469	2.73946	A0A369K4H1	0.150737	1.64304
A0A369KE11	0.0634768	1.27368	A0A369JAG4	0.000251792	25.3425	A0A369J7J1	0.00780927	0.35531
A0A369JHX8	0.0325338	2.58915	A0A369JUE7	3.38554e-06	50.1091	A0A369JJI6	0.189885	1.3283
A0A369K8P7	0.177102	0.857555	A0A369JT20	0.000725314	0.193992	A0A369J9E2	0.262132	1.42792
A0A369K3M4	0.013629	0.538672	A0A369JYX0	0.0018753	1.89163	A0A369JQP5	0.141735	0.695843
A0A369JBI8	0.00425831	0.295089	A0A369K0T7	0.0023456	2.01204	A0A369J5W9	0.00839779	1.48227
A0A369JR45	0.00127316	1.93736	A0A369K6U8	0.000764389	3.57785	A0A369JP87	0.034543	0.638379
A0A369K7V4	0.527974	1.2446	A0A369K8W6	0.0464182	1.73732	A0A369J6C6	0.00104736	0.464469
A0A369JP87	0.792725	0.935844	A0A369K9X8	0.00368114	0.269885	A0A369JFX8	0.00397228	1.938
A0A369JKB6	0.144085	0.651256	A0A369IZU7	0.000833237	0.360498	A0A369JY97	0.0951718	2.80838
A0A369JH43	0.00311616	4.21372	A0A369J712	0.0124748	3.67652	A0A369JPN1	0.0201479	2.00365
A0A369K7Q6	0.000346904	0.0578901	A0A369J5W9	0.182435	0.877611	A0A369K557	0.10242	0.559567
A0A369JQD5	0.634626	0.887898	A0A369JR83	0.00854036	0.0649191	A0A369JKX4	0.0455955	1.4811
A0A369KBM5	7.92522e-05	0.0622723	A0A369JXA1	0.00473998	2.42287	A0A369JF34	0.980544	0.992467
A0A369JN22	0.00448482	3.73395	A0A369K215	1.33937e-06	8.07164	A0A369KAQ8	0.566202	1.19678
A0A369JG58	0.198034	2.84471	A0A369KE72	0.0506408	0.513082	A0A369JJD7	0.0239689	3.9163
A0A369J715	0.0402338	0.54173	A0A369JKT8	0.0471767	0.240704	A0A369K033	0.18926	2.04865
A0A369K236	0.229062	1.25216	A0A369JKF9	0.0534569	2.66882	A0A369K6J6	0.892824	1.04778
A0A369K7D4	0.000289734	0.310233	A0A369KC16	0.0258753	3.69508	A0A369KAE7	0.0130776	1.84169
A0A369J7C0	0.165436	1.49218	A0A369J7J1	0.00232415	3.52547	A0A369JQ00	0.553339	0.931472
A0A369JIY3	3.8065e-05	3.5096	A0A369J3E7	0.00192246	17.5034	A0A369KDP6	0.136453	0.49994
A0A369JLG6	0.134477	0.642412	A0A369JGT2	0.00205934	2.98654	A0A369K8H0	0.00780927	1.86085
A0A369K4X3	3.76078e-05	0.449016	A0A369KBC4	0.000354289	11.797	A0A369J5L8	0.0889191	0.682459
A0A369JFT3	0.0344718	0.188743	A0A369J7X5	0.063914	2.44607	A0A369JGM1	0.0763016	0.682821
A0A369JTG5	0.00967745	2.06524	A0A369JN76	0.422188	1.15551	A0A369K1M4	2.43666e-05	0.230908
A0A369K4J4	0.0103616	1.82278	A0A369JC24	0.190528	0.822437	A0A369K1V0	0.970451	1.01211
A0A369K846	0.183767	0.646081	A0A369JZB8	0.033335	0.299733	A0A369JLL3	0.211776	1.98171
A0A369K1V7	0.00624743	1.82183	A0A369JJD6	0.022496	0.50728	A0A369JB27	0.0216357	0.188918
A0A369K2Y3	0.104389	1.19463	A0A369JBD7	0.970235	1.01261	A0A369JQC9	0.999801	0.99987
A0A369KAS3	0.185854	0.73987	A0A369K257	0.000192082	9.64494	A0A369JR50	0.0318675	0.53176
A0A369J724	0.00102116	0.111279	A0A369K4E3	5.83647e-05	6.72838	A0A369K8A7	0.0105389	2.44596
A0A369JMM1	4.15616e-06	0.174981	A0A369JQX6	0.00695083	3.43115	A0A369K4T7	0.434404	0.683516
A0A369J705	0.0165291	0.588211	A0A369JKA6	0.000519113	6.11383	A0A369JM95	0.000138244	0.110983
A0A369JU80	0.00371549	0.224288	A0A369JFN0	0.0142761	0.547555	A0A369JX48	0.00131975	3.49573
A0A369JT26	0.000997323	0.384679	A0A369JM89	0.144811	0.398239	A0A369K4V1	0.0275582	1.87282
A0A369JV56	0.0184308	0.514526	A0A369JRV1	0.0706864	0.264842	A0A369JJG7	0.000552591	0.163492
A0A369K202	0.00370111	5.72642	A0A369JJU6	0.962425	1.01001	A0A369JFY1	0.133127	1.64721
A0A369JLQ7	0.0456634	0.624936	A0A369JFR5	0.216284	1.4238	A0A369JAJ3	0.0228466	1.42764
A0A369JVM4	0.0140224	2.04547	A0A369JBN2	0.0146007	2.46262	A0A369JL56	0.00630485	0.350669
A0A369JF38	0.000159347	0.181625	A0A369K4T9	0.634851	1.1371	A0A369JG55	0.286175	1.31141
A0A369K8H1	0.0735652	1.68936	A0A369JHE0	0.00119061	0.290957	A0A369JEI2	0.331804	1.22507
A0A369JI98	0.987037	0.997576	A0A369K626	0.046497	1.98844	A0A369JNV0	0.0173215	0.696639
A0A369JG32	0.000320638	3.38773	A0A369JKX9	0.00282968	2.8365	A0A369J0T8	0.0011414	2.35885
A0A369JH98	0.000689195	0.123458	A0A369JHX7	0.340229	1.16627	A0A369K3E5	0.0083096	3.91545
A0A369K4X5	0.143725	1.77736	A0A369JJE2	0.00259089	0.44514	A0A369JGG3	0.0364294	1.71175
A0A369JGG1	0.15825	1.35579	A0A369JE01	2.38282e-06	6.24268	A0A369JMN3	0.504471	0.864558
A0A369K0M5	0.00321694	0.434255	A0A369JK93	0.00965293	2.71998	A0A369JYN3	0.0596986	1.57713
A0A369JC22	0.168779	0.690007	A0A369JZJ0	0.00190432	0.197802	A0A369J9S5	0.201301	1.58158
A0A369KAB3	0.589415	0.849394	A0A369K7R6	0.00109423	1.9846	A0A369JHX7	0.00562906	0.728968
A0A369JJU6	0.0640443	1.42121	A0A369KA55	0.00719645	7.00194	A0A369JC24	0.0195827	1.96713
A0A369JEP2	0.0409042	0.610751	A0A369JN02	0.00113778	7.99319	A0A369JFF9	0.0107274	2.64016
A0A369JXA1	0.0417085	1.64327	A0A369JDB4	0.569818	0.866587	A0A369JGA5	0.0904502	0.730658
A0A369JBE4	0.000174534	2.98193	A0A369JUQ1	0.000570282	9.61694	A0A369JL99	0.665753	0.927856
A0A369JA34	0.00125216	4.57613	A0A369JG86	0.0113789	0.365115	A0A369JYT6	0.21126	0.606633
A0A369J4G9	0.0845385	1.65687	A0A369JK56	0.079262	0.222515	A0A369K9Y1	0.0798933	0.691252
A0A369JFD6	0.0878109	2.93871	A0A369IY90	0.0060292	0.500865	A0A369K3T2	0.342277	0.817383
A0A369JLL3	0.0015283	3.32502	A0A369K3R0	0.0529075	0.580553	A0A369JDB3	0.0521974	0.727815
A0A369K8E6	0.0979143	1.73744	A0A369JJG4	4.78599e-05	6.00832	A0A369JMQ4	0.00363569	0.237613
A0A369KEF2	0.000238529	0.348415	A0A369K3C7	0.078515	0.568483	A0A369JG32	0.030944	2.2566
A0A369JN14	0.042663	1.41288	A0A369JRG3	0.020693	2.57317	A0A369IYH2	0.01259	0.318947
A0A369JHX7	0.259766	0.85017	A0A369JXF6	0.00119821	5.55625	A0A369JLF5	0.0153563	0.274637
A0A369JYQ3	0.000323323	0.216744	A0A369JT28	0.188509	1.27151	A0A369K6Z0	0.00185061	2.14852
A0A369JTS2	0.000284492	3.26053	A0A369J2T0	0.000946061	0.414566	A0A369JHT0	0.458982	1.21167
A0A369J5W0	0.0288996	0.530158	A0A369JG32	0.0278839	1.50125	A0A369K4E3	0.25147	0.624339
A0A369JFQ9	0.000136916	2.54862	A0A369K9Z4	0.0329677	2.59059	A0A369JXR8	0.249947	0.81554
A0A369JLE7	0.0469221	1.92113	A0A369JL99	0.0372958	4.59287	A0A369K4E4	0.00563969	3.05365
A0A369K2W1	0.0739241	2.91482	A0A369JJP1	0.000451424	7.38917	A0A369K7N2	0.102914	0.45497
A0A369J7S8	0.00223956	0.365596	A0A369JEP2	0.0335045	0.556999	A0A369JP91	0.10586	0.747361
A0A369JG08	0.0724431	2.94248	A0A369JJT5	0.0110088	0.464938	A0A369KCW4	0.112626	1.38354
A0A369K756	0.0202049	0.413009	A0A369JKH0	3.01249e-05	9.9029	A0A369JJT5	0.0244927	2.0426
A0A369JNW4	0.933325	0.981746	A0A369JC19	0.346048	1.09498	A0A369J2Q1	0.947454	0.970663
A0A369JID5	0.0566772	3.89237	A0A369K115	0.0092047	2.28493	A0A369JUP1	0.00528693	1.3584
A0A369JHY6	0.00514379	0.43448	A0A369K1V8	0.00997684	0.334945	A0A369JBN2	0.31099	0.678475
A0A369JE95	0.00796172	0.301963	A0A369K592	0.0100578	0.381914	A0A369JFR5	0.0103001	0.432834
A0A369K664	0.0174648	2.48421	A0A369JR82	0.976677	1.01154	A0A369JQS6	0.00366504	2.18187
A0A369K468	0.0777782	2.30833	A0A369JVD1	0.0249917	9.91684	A0A369KBL2	0.941819	1.03764
A0A369K511	0.240297	0.816562	A0A369JUV3	8.89407e-05	17.6646	A0A369K9X8	0.997046	1.00064
A0A369JZS2	0.00119176	0.314126	A0A369JYB4	0.0418509	1.56588	A0A369JTA2	0.0938469	3.04387
A0A369JYH5	0.00301385	8.80337	A0A369K511	0.652913	1.09962	A0A369JU48	0.128224	1.73589
A0A369J7X5	0.779934	1.05335	A0A369K1V0	1.55972e-05	18.5621	A0A369JBV2	0.314474	0.870639
A0A369JBI6	0.00041547	0.280915	A0A369K2M8	0.0289978	0.324798	A0A369K064	0.820213	0.857057
A0A369JG59	0.611317	1.15388	A0A369JCT3	0.000639325	0.265004	A0A369J7X5	0.10242	0.430627
A0A369JFG2	0.510616	0.823318	A0A369K5B3	0.000118941	0.24368	A0A369JK95	0.00322663	4.0371
A0A369JYN7	0.00803138	6.48638	A0A369JMQ4	0.606771	1.09023	A0A369K9Z4	0.486094	1.44559
A0A369JC19	0.299057	1.09923	A0A369JN75	0.05783	0.694817	A0A369JW05	0.0120863	3.45808
A0A369JGM8	0.0045949	4.62486	A0A369JUP8	8.0914e-06	12.4983	A0A369JTG5	0.158684	1.2049
A0A369J962	0.000231193	0.148493	A0A369JJ14	0.000465447	4.62689	A0A369JE72	0.520484	0.741149
A0A369JD20	0.773718	0.95177	A0A369K5S6	0.0134919	3.19895	A0A369JWX1	0.00807648	0.424916
A0A369K068	0.00114934	2.44694	A0A369K676	0.00252021	0.262892	A0A369JXC1	0.358036	0.842901
A0A369JHL0	0.163649	0.784775	A0A369JGG3	0.00423051	0.185027	A0A369K859	0.0124242	0.413131
A0A369K612	0.00291581	0.0200564	A0A369K4L9	0.00125197	6.08396	A0A369JVD8	0.0156039	0.53726
A0A369K274	0.347613	1.54263	A0A369JXN7	0.000190746	39.9069	A0A369K939	0.0564483	1.41775
A0A369JLA1	0.00177358	0.0784035	A0A369JPH5	0.0287028	2.12163	A0A369K359	0.108934	0.708749
A0A369KDT1	0.000278812	0.253912	A0A369JHK2	0.00259228	0.215966	A0A369K9H2	0.43308	0.929023
A0A369JMQ4	0.000535179	0.259053	A0A369JRX6	0.0779744	0.519167	A0A369KA72	0.340236	1.07573
A0A369J7V4	0.00825359	3.79535	A0A369KA60	0.0819799	0.549211	A0A369JU46	0.0337546	0.293461
A0A369JJD0	0.000177533	0.127917	A0A369K243	0.491511	0.82673	A0A369JYU0	0.992691	1.00364
A0A369JVS3	0.016252	5.61967	A0A369J6Z3	0.00331139	1.82719	A0A369JJ14	0.137024	0.565958
A0A369J3H1	0.169933	3.02184	A0A369J8A0	4.06396e-05	9.83675	A0A369JEB1	0.000514191	1.73449
A0A369J790	2.07063e-06	0.0872777	A0A369K2W0	0.00529009	6.78376	A0A369K0J6	0.0234639	2.0945
A0A369J956	0.042171	1.52083	A0A369J940	0.00132981	2.32981	A0A369K6U8	0.0086996	0.6229
A0A369JYP8	0.00124228	5.66612	A0A369JDY0	0.00221447	0.0734444	A0A369K1L8	0.0353124	1.96604
A0A369JJV8	0.0252046	0.437436	A0A369K6J6	1.74213e-06	11.9968	A0A369J7R2	0.00293536	3.20576
A0A369JIZ1	0.00803982	0.259899	A0A369K319	0.00122823	33.1861	A0A369JTD8	0.00690601	11.3387
A0A369JBV2	0.00714139	1.38551	A0A369IZM0	0.238343	0.838476	A0A369K319	0.000998563	0.470687
A0A369KH52	0.0103082	0.611361	A0A369K5R6	0.0951648	1.83991	A0A369JU93	0.0172384	0.585481
A0A369K032	0.000672552	0.0286768	A0A369K3T8	6.12043e-05	0.196215	A0A369IY90	0.107817	1.31677
A0A369J8W0	0.00063965	0.252285	A0A369JY90	0.213495	0.720127	A0A369JE01	0.146062	0.622165
A0A369J6Z6	0.229651	0.678521	A0A369K6V5	8.09355e-05	7.49235	A0A369JK93	0.0951192	1.39773
A0A369JPG9	0.000349611	3.68953	A0A369J0T1	0.000281303	10.4494	A0A369J6L0	0.00701011	3.28135
A0A369J8Y9	0.0027827	14.499	A0A369KCW4	0.000217545	16.0668	A0A369JCP1	0.778534	0.87103
A0A369K4S9	0.0171428	3.43985	A0A369KDX0	0.0002039	5.80928	A0A369JPH5	0.151827	0.617866
A0A369K9A5	0.0142992	0.602284	A0A369K4U8	0.0767921	0.5478	A0A369K1V8	0.311819	0.674745
A0A369JZ24	5.19502e-05	2.64651	A0A369JYN3	0.165451	0.775044	A0A369J625	0.0372081	2.98377
A0A369JFB2	0.00167804	5.61436	A0A369K2U7	0.017786	0.0880329	A0A369JH34	0.0351887	1.50287
A0A369JQM8	0.970158	0.994026	A0A369K7W3	0.158975	1.29255	A0A369JUA5	0.00334347	0.398176
A0A369JL65	0.250219	0.952384	A0A369JJ95	0.14422	0.556806	A0A369JLV6	0.329492	1.16551
A0A369KAH3	0.101651	1.24409	A0A369JR44	2.71667e-05	5.16621	A0A369K626	0.107492	0.674989
A0A369JHJ9	0.00311378	0.306541	A0A369JL94	0.497373	0.859279	A0A369JN02	0.209738	0.725799
A0A369JA35	0.000169428	0.112811	A0A369K448	0.0368913	0.705708	A0A369J3A9	0.851369	0.945808
A0A369K5W0	0.161435	1.43006	A0A369JYQ7	0.000569773	9.07611	A0A369JIJ3	0.719809	0.879163
A0A369J8T2	0.0124369	0.621416	A0A369J625	0.00459352	0.562242	A0A369JHE0	0.00106688	0.645125
A0A369JAK9	0.000817888	0.179264	A0A369K026	0.217282	1.26927	A0A369JCT3	0.00446998	1.75202
A0A369KC56	6.32961e-05	34.9049	A0A369J5E3	0.00161507	0.439803	A0A369K8C5	0.109422	1.39743
A0A369JXR8	0.00787651	1.90352	A0A369J705	0.366855	1.38535	A0A369K2W0	0.179196	1.89694
A0A369J0W4	0.00141678	0.371401	A0A369JCP1	3.86212e-05	7.51098	A0A369JM31	0.350187	0.659836
A0A369J7Y5	0.00177571	0.276458	A0A369K9J9	0.258828	1.23861	A0A369JY95	0.0594113	1.49864
A0A369J902	9.11189e-06	4.22188	A0A369JHI0	0.000832998	0.214139	A0A369K294	0.0278929	1.96395
A0A369JFE9	0.000849549	0.250146	A0A369JJY9	0.00241494	0.0328994	A0A369KA60	0.187087	0.821692
A0A369JU88	0.321566	32.8757	A0A369JP74	0.000664658	0.387625	A0A369KA29	0.0283872	2.19749
A0A369J5L2	0.000221292	0.40971	A0A369JKC0	0.00222762	1.98734	A0A369KDX0	0.433689	1.16114
A0A369JFP7	0.000160727	0.296602	A0A369JV41	0.000500418	10.0676	A0A369J8A0	0.000796805	0.398867
A0A369JPA1	9.86649e-05	0.276382	A0A369K3T2	0.000178684	3.3882	A0A369J6Z3	0.0491789	0.843216
A0A369JTN5	0.00654418	1.67352	A0A369J2C9	0.00844198	0.420074	A0A369JN30	0.136041	1.30103
A0A369J6Z3	0.00843779	1.54072	A0A369JJ31	0.00248298	5.77598	A0A369K5Q4	0.038758	0.491098
A0A369JFR5	0.042072	0.616271	A0A369JWY1	0.00142749	7.45945	A0A369JP02	0.0739079	0.636641
A0A369JMP7	0.201104	1.41345	A0A369K3E5	0.00866315	0.381709	A0A369K5S6	0.0067076	3.77806
A0A369IZB3	2.43979e-05	0.274229	A0A369JBV2	0.00421891	1.59137	A0A369K215	0.402669	1.14557
A0A369JJI3	0.693022	1.06793	A0A369JDH2	0.000788387	0.597407	A0A369K5B3	0.0802775	1.20891
A0A369K7C8	0.141023	1.12463	A0A369K4Y0	0.00206245	0.227963	A0A369J086	0.422333	0.704349
A0A369K290	0.0580028	0.35817	A0A369JJI3	0.132963	1.41856	A0A369JJ31	0.00351555	3.62063
A0A369J0W1	0.00526663	0.160421	A0A369JN45	0.000155216	0.174072	A0A369J1K9	0.840658	1.04776
A0A369J4J2	0.000503392	0.342138	A0A369K427	9.56728e-05	8.11164	A0A369K239	0.00257122	1.88077
A0A369KA85	0.072612	1.38982	A0A369JR45	0.739037	0.948563	A0A369JNB2	0.526812	1.26756
A0A369J223	0.00540055	0.659598	A0A369JKG5	0.000110214	14.7132	A0A369JG86	0.000120554	8.60934
A0A369K5V5	0.00238834	3.53535	A0A369JYY2	0.00809426	3.35689	A0A369JKP6	0.25405	0.843631
A0A369JJ62	0.00310246	0.599839	A0A369J4G9	0.018917	0.535356	A0A369JZJ0	0.00820393	3.60868
A0A369JQR8	0.0693733	1.48225	A0A369J715	0.604318	0.825094	A0A369K3T8	0.0229628	1.39018
A0A369K162	0.0634905	1.45088	A0A369J209	1.38613e-05	36.3963	A0A369K2M8	0.261356	0.757964
A0A369J3R4	0.00753789	5.29208	A0A369JGR9	0.000372601	2.82875	A0A369JUQ1	0.000157502	0.300672
A0A369K2J4	0.00123817	0.390978	A0A369J7T2	0.0514483	1.69924	A0A369K1T3	0.0119252	1.35153
A0A369K8Q1	0.000316673	0.27403	A0A369JVD8	0.00189794	0.14213	A0A369JTR1	0.628216	0.827093
A0A369J9V9	0.0060366	0.680757	A0A369K4M7	0.000789933	10.4075	A0A369JJE2	0.0197335	1.71698
A0A369K0Z4	0.0476658	0.485506	A0A369K7M9	0.000750797	0.314474	A0A369JJI3	0.0168257	0.752829
A0A369KA31	0.0171822	0.400584	A0A369JTI5	0.000985036	9.02349	A0A369J0T1	0.831215	0.932569
A0A369JBN2	0.0767575	1.67082	A0A369JG94	0.000764389	12.0256	A0A369KAH3	0.0868011	1.35151
A0A369K5R6	0.00780812	1.57282	A0A369J3A9	0.005097	0.242994	A0A369JR82	0.870121	0.971257
A0A369JH87	0.0021292	7.45473	A0A369J411	0.0287028	1.60215	A0A369JFN0	0.0309397	1.43547
A0A369J2Z6	0.00387733	1.92043	A0A369JEI2	0.0157342	0.324247	A0A369JF26	0.946662	1.02768
A0A369JI27	0.013589	0.207229	A0A369JNB3	2.88985e-06	8.96787	A0A369J462	0.636105	1.11649
A0A369J559	0.000199687	3.80296	A0A369K5Q6	0.136687	1.76748	A0A369JIT8	0.0655759	1.28597
A0A369KFK6	0.00124576	4.51135	A0A369KCI6	0.00258879	0.168147	A0A369JR45	0.0410374	2.04241
A0A369JSR9	0.000403135	0.348923	A0A369JI98	0.0168944	0.773801	A0A369K0Y3	0.0432072	2.38216
A0A369K639	0.000286408	0.192767	A0A369KAH3	0.536896	0.920521	A0A369JMU0	0.0176144	1.96777
A0A369JMA3	0.409484	1.3898	A0A369JUA6	0.0160533	0.490427	A0A369KAM4	0.418642	1.17775
A0A369K7R6	0.000581613	2.45132	A0A369KDV5	0.0134463	1.57271	A0A369JJY9	0.0567539	1.40362
A0A369JJB9	0.00718985	3.51968	A0A369JFY1	0.246207	0.721913	A0A369JIH8	0.00695688	2.35477
A0A369K1I6	0.00114197	2.57775	A0A369JXY3	0.0086412	0.434886	A0A369J5G2	0.0244927	0.356349
A0A369J4H3	0.000514878	2.98918	A0A369J5G2	0.0131536	0.426457	A0A369JYX0	0.0279879	2.33293
A0A369K5H2	0.888052	0.97172	A0A369JNW4	0.169366	1.61556	A0A369JQX6	0.034939	0.642742
A0A369J1Y0	0.213368	0.814467	A0A369JZN7	0.000623177	2.59914	A0A369JUA6	0.0143082	2.8097
A0A369J678	0.00119176	0.59726	A0A369K2G0	0.00965293	2.78759	A0A369KA55	0.00419262	2.60122
A0A369JW65	0.035588	1.716	A0A369JDX0	0.0148569	0.0768929	A0A369K592	0.20188	1.27085
A0A369KD25	0.000834293	26.1932	A0A369J463	0.155979	0.71339	A0A369JRG3	0.120285	1.42734
A0A369K0W1	0.0044562	2.76799	A0A369K3J7	0.000402698	3.06199	A0A369JN75	0.152796	0.440039
A0A369JMK6	0.000216783	2.83511	A0A369JH57	0.00029533	0.393225	A0A369JM89	0.0111371	0.358978
A0A369K3J5	0.83688	0.979797	A0A369JVY3	0.000402554	0.372788	A0A369KAE3	0.202846	1.5512
A0A369JYX0	0.00141031	4.41306	A0A369K229	1.94561e-07	12.8367	A0A369K4X2	0.000720524	2.19846
A0A369K064	0.525312	1.28735	A0A369JE72	0.000113897	3.91659	A0A369JXF6	0.00476203	0.251694
A0A369JC36	0.0256744	1.74636	A0A369KAK2	0.000800252	2.19842	A0A369JY82	0.296159	1.54387
A0A369JGM4	0.000103397	0.23823	A0A369JSL1	0.000285519	14.852	A0A369J463	0.0645269	1.57772
A0A369JGM5	0.0376451	4.51976	A0A369JM95	0.0948632	1.35241	A0A369JPU7	0.0486351	0.700385
A0A369JHQ3	0.014283	2.91728	A0A369K1H7	0.000988664	0.239679	A0A369K4Y0	0.00363569	3.90675
A0A369JDW2	0.000136123	0.358146	A0A369JG10	0.00222762	7.57224	A0A369J835	0.021315	2.78647
A0A369JT49	0.693022	0.910956	A0A369JVP7	0.000304536	0.200419	A0A369KEZ2	0.0304665	0.788333
A0A369JEG0	0.456247	0.912577	A0A369K9L8	0.000117726	7.46252	A0A369K115	0.851708	1.09443
A0A369J9B6	0.531983	1.10946	A0A369K846	0.00190432	0.690323	A0A369JIB4	0.0889191	2.6834
A0A369J8A6	0.000334975	0.358611	A0A369KCE8	7.43814e-05	2.79548	A0A369J696	0.00805878	0.110562
A0A369JNS7	0.218224	0.859716	A0A369JB29	0.00278262	21.2841	A0A369K4L9	0.00839779	0.319536
A0A369JAR4	0.6481	1.08751	A0A369JD10	0.000211361	3.4404	A0A369KFU7	0.437157	0.860792
A0A369JT28	0.717719	1.07202	A0A369J1E2	0.000182706	14.5379	A0A369IZU7	0.00303692	2.41623
A0A369JT12	0.0390594	0.800822	A0A369JNB0	0.000354289	4.72218	A0A369J2T0	0.0943298	0.694092
A0A369JGT3	0.00540055	2.79931	A0A369JQD5	0.00503078	0.424629	A0A369K026	0.150737	1.19117
A0A369JUB4	0.00612929	0.347954	A0A369KCZ1	0.000341675	2.94173	A0A369J6V3	0.0488603	1.90348
A0A369K5Q6	0.0306365	7.99131	A0A369JW94	0.00706296	0.332935	A0A369JW94	0.0886339	0.783712
A0A369KA25	0.000203404	0.141138	A0A369K9K8	0.026642	1.63484	A0A369JC22	0.157943	0.713571
A0A369K859	0.322372	1.13176	A0A369J761	0.000218234	0.449801	A0A369J5V5	0.903998	0.946462
A0A369J8D4	0.642887	0.912058	A0A369K4Z0	0.90668	0.930878	A0A369JJV8	0.0675971	0.524294
A0A369K9J9	0.0466712	1.79019	A0A369JJV8	0.699901	0.834333	A0A369K448	0.0712068	0.741898
A0A369IZ25	0.0929597	0.857872	A0A369J097	2.15845e-05	5.69142	A0A369J9P5	0.029544	0.740428
A0A369JM95	6.29748e-05	0.150095	A0A369KGT0	0.087318	0.215976	A0A369JY59	0.00135546	3.56275
A0A369JPH5	0.00642298	1.31088	A0A369JVM4	0.027762	0.706477	A0A369JP74	0.0083096	2.68916
A0A369J4D6	0.415015	1.14997	A0A369K6N2	0.0309401	0.303198	A0A369K274	0.00249374	2.55202
A0A369JZ07	0.531968	1.31342	A0A369J7B4	0.00982496	0.150324	A0A369JGN9	0.024284	3.00135
A0A369JI06	0.0811089	1.63356	A0A369J2Q8	0.00171763	4.66225	A0A369K2Z5	0.0216357	0.66878
A0A369KGG8	0.841969	0.945318	A0A369JPU8	0.379504	1.89643	A0A369JYB9	0.571147	1.21732
A0A369J6N5	0.0171755	1.6931	A0A369KAE3	0.00017851	21.7339	A0A369KCI6	0.0516768	1.37549
A0A369JEZ9	0.00202971	0.55418	A0A369K1K9	0.00381399	0.344371	A0A369K7R6	0.210394	1.23517
A0A369K9K8	0.107855	1.44343	A0A369JDW0	0.00119061	3.77616	A0A369JJP1	0.791612	1.06407
A0A369K3K5	0.387516	1.52512	A0A369JGG8	0.000211361	0.107424	A0A369KCN2	0.102344	1.2902
A0A369JVT3	0.00158885	3.67963	A0A369K9H4	5.04923e-06	11.3227	A0A369JU43	0.108934	1.39667
A0A369JG67	0.000253614	0.165645	A0A369JRZ8	0.0055325	0.122405	A0A369K684	0.145752	1.31677
A0A369K8B6	0.0735652	1.59976	A0A369K3K2	0.192703	1.33825	A0A369K0H6	0.066496	1.52397
A0A369JBD9	0.000679219	7.02525	A0A369K4G6	0.000458081	1.89649	A0A369JR22	0.00202331	6.4199
A0A369KAG9	0.00153858	0.041915	A0A369JIB4	0.205465	0.653379	A0A369JXY3	0.0643086	1.37333
A0A369KCV2	0.00204682	0.439384	A0A369JWX1	0.00220669	3.1233	A0A369K9D5	0.0244927	2.64839
A0A369KBI6	9.76525e-05	12.9329	A0A369JU37	0.000247986	0.433031	A0A369K6V5	0.00143276	1.69362
A0A369K2A6	0.00654222	13.7952	A0A369K064	0.247917	1.50206	A0A369JEZ9	0.0244285	0.292912
A0A369J8V8	0.013629	2.24923	A0A369K6S2	0.00988529	0.454643	A0A369KE72	0.0364294	0.618248
A0A369K026	0.0858039	1.51192	A0A369K8J7	0.723695	0.89882	A0A369K3Z5	0.291061	1.86168
A0A369JFW7	0.00368743	10.8774	A0A369J4D6	0.10755	1.16275	A0A369JC19	0.977339	1.00388
A0A369JPJ1	0.000665904	5.14952	A0A369JG42	7.63577e-06	3.99931	A0A369K2U7	0.0632055	2.7385
A0A369J490	6.29748e-05	4.19689	A0A369JUI6	0.000443397	5.69454	A0A369J7T2	0.0335456	0.32894
A0A369JB92	0.00125646	3.03733	A0A369JHT4	0.00105702	4.75873	A0A369KDX8	0.0121352	2.56171
A0A369K8U8	0.000524953	4.06324	A0A369K274	0.124401	0.604472	A0A369JPU8	0.0631312	1.59313
A0A369JA46	0.078838	1.2205	A0A369J8P4	0.000818183	0.495367	A0A369J8P4	0.00322663	4.22979
A0A369KDV5	0.0118185	0.750438	A0A369JGG0	0.00127194	6.32263	A0A369JBL7	0.298787	0.823982
A0A369JZ34	1.44678e-05	3.73904	A0A369K039	0.00418793	0.0171121	A0A369JUN7	0.0293483	2.8129
A0A369JF33	0.0002145	0.196674	A0A369JUL7	0.00195086	0.108171	A0A369JCV1	0.831019	0.955
A0A369J3F6	0.0750847	1.36142	A0A369J2L5	9.16902e-05	6.55293	A0A369KE11	0.159469	1.32915
A0A369JA49	0.385375	0.879498	A0A369J5B2	1.83396e-05	3.30262	A0A369JQR8	0.942778	0.9754
A0A369JZG0	2.56651e-05	6.21598	A0A369K1D1	0.0203265	2.68881	A0A369IYQ5	0.0168232	2.06618
A0A369JN26	0.00263424	1.82208	A0A369J3F6	0.611069	1.06204	A0A369K8S7	0.019258	2.01748
A0A369J6Q4	0.0185108	0.720709	A0A369JWP7	5.28289e-06	3.3	A0A369K676	0.0289758	1.8404
A0A369JL56	0.708707	0.961923	A0A369JQA8	0.00719645	2.69015	A0A369KFQ4	0.00312615	3.28994
A0A369J7D1	0.00629835	3.70089	A0A369IYM9	0.00294607	0.310663	A0A369K1D1	0.528868	1.14145
A0A369JGD6	0.00149511	0.195733	A0A369JD20	0.905266	1.01265	A0A369JYY2	0.000148359	6.13979
A0A369JS71	0.00204682	0.357381	A0A369JQQ2	0.00452933	0.479178	A0A369KCK7	0.0200124	1.51025
A0A369JGB2	0.00492164	0.502926	A0A369IYB6	0.000479722	2.01062	A0A369JVD1	0.304852	1.44098
A0A369K4T9	0.183027	1.57196	A0A369K0Q3	3.13226e-05	3.76147	A0A369JD20	0.754718	0.939877
A0A369K0T7	0.000941376	4.93178	A0A369J974	0.000505936	0.194214	A0A369K2H4	0.0111559	0.282866
A0A369K1B0	0.000102863	0.272524	A0A369K1T5	0.00548182	1.73206	A0A369JN45	0.251097	1.14697
A0A369JMA2	0.0273651	0.69307	A0A369J537	7.41621e-05	5.39025	A0A369IY36	0.00202331	2.08346
A0A369J543	0.205528	1.2638	A0A369J9I3	0.0581264	1.64084	A0A369JG94	0.0160968	1.31555
A0A369K8J7	0.0176284	2.92566	A0A369JAB8	0.00614534	5.51864	A0A369JAB8	0.000242698	0.164823
A0A369K6G3	0.000251887	0.165734	A0A369K3J5	0.0478618	1.223	A0A369JGR9	0.977419	0.993566
A0A369JBK4	0.2554	0.767291	A0A369J5D5	0.00961247	37.0721	A0A369K8W6	0.00555861	0.546926
A0A369J196	4.12246e-06	14.9578	A0A369KAR5	0.00196323	0.393978	A0A369JL94	0.0169865	0.619473
A0A369K1U2	0.000208583	3.31649	A0A369K2K0	0.000623177	0.262901	A0A369JI98	0.160227	1.28919
A0A369JNF8	0.0468366	2.17323	A0A369J5K1	0.00160443	0.56088	A0A369K3P8	0.000607586	2.68624
A0A369K529	0.00245052	0.485679	A0A369JCT1	0.00197335	4.13773	A0A369JI06	0.0242253	0.284521
A0A369JM85	8.03734e-05	0.115855	A0A369K034	0.0032155	9.16763	A0A369JHK2	0.634717	1.07749
A0A369K9E4	0.20821	0.723981	A0A369JZ07	0.22756	0.665029	A0A369JT10	0.161308	0.9005
A0A369K3Y9	0.00224649	1.95202	A0A369JGM7	0.00255347	0.483143	A0A369JBJ0	0.0449869	3.247
A0A369JWX1	0.0782944	1.32714	A0A369JUB4	0.0631125	0.565173	A0A369JJS6	0.22399	1.78631
A0A369IYB3	0.00274453	10.6664	A0A369JT41	0.000334382	5.77588	A0A369K427	0.381884	0.767676
A0A369JQB6	0.00224649	0.479089	A0A369JRF4	9.36879e-05	0.213522	A0A369JSH9	0.0402195	2.51412
A0A369JTP6	0.0974289	0.623804	A0A369JP34	0.00265923	9.04726	A0A369K4G6	0.908461	1.03908
A0A369KD97	0.682115	0.905732	A0A369J8L4	5.36571e-06	8.32086	A0A369K846	0.812237	0.935911
A0A369JIM5	7.60291e-06	5.1323	A0A369KF63	3.35745e-05	0.0855145	A0A369IZM0	0.200601	0.637625
A0A369JKD1	0.0115272	0.361016	A0A369K836	0.157495	0.611041	A0A369K833	0.479712	0.799233
A0A369K729	0.00464286	2.73594	A0A369K966	0.00574991	5.18701	A0A369JT41	0.848259	0.955243
A0A369J3Y8	0.0267381	0.588224	A0A369JE22	0.000313902	2.36149	A0A369KDV5	0.00241075	0.477164
A0A369JYB4	0.0356825	1.49784	A0A369JDS5	0.00233052	0.341729	A0A369J411	0.0976022	0.634499
A0A369JUH1	2.62182e-05	0.397362	A0A369KAS3	0.0144213	0.470553	A0A369K5Q6	0.000816146	4.5213
A0A369K712	0.000222749	5.82321	A0A369JVV5	0.0552731	0.389397	A0A369K0T7	0.0406862	2.45113
A0A369JQY5	0.00572791	7.67507	A0A369JV27	0.000391145	2.22309	A0A369KBC4	0.44466	1.46776
A0A369K626	0.21882	1.34217	A0A369JPU7	0.00115208	2.59066	A0A369J940	0.0214601	0.418452
A0A369KF75	0.045446	1.228	A0A369IYQ5	0.00315443	0.23859	A0A369JUI6	0.845012	0.939298
A0A369K701	1.52758e-05	16.3069	A0A369JFN4	0.00291785	0.0955577	A0A369JSU6	0.0333381	1.30662
A0A369KHW8	0.113792	1.31333	A0A369JII8	0.0257684	0.19211	A0A369JIW2	0.00545718	2.53642
A0A369JX66	0.0790172	2.14632	A0A369JLN8	0.0288647	0.565184	A0A369JHI0	0.167101	1.56383
A0A369J2L3	0.00317929	2.64102	A0A369JTW7	0.00592674	0.345956	A0A369KFQ0	0.00278832	0.548302
A0A369JN30	3.84214e-05	3.93473	A0A369J9G0	4.68364e-05	10.9487	A0A369JEP2	0.590619	1.0965
A0A369J5D9	0.00669115	8.43625	A0A369JN22	0.00332907	0.618371	A0A369JVY3	0.00039762	6.02913
A0A369J411	0.920517	1.01656	A0A369JYC5	0.0020992	0.469408	A0A369J9I3	0.55635	1.21642
A0A369JIG9	0.000232833	0.241598	A0A369K833	0.00756547	1.65773	A0A369K9J9	0.113271	1.44532
A0A369J8J7	0.00193186	4.13214	A0A369J7U0	0.000621218	0.224646	A0A369K6N2	0.58352	0.838814
A0A369K1D2	0.00200565	0.423373	A0A369JN54	0.029938	4.33192	A0A369JDH2	0.0160387	1.2973
A0A369JK93	0.00812237	3.80179	A0A369JFQ1	0.00436189	4.6304	A0A369JGG8	0.00202331	4.2303
A0A369JRG3	0.0170501	3.67278	A0A369JBY3	0.000474307	17.7939	A0A369JML9	0.0632055	1.82793
A0A369K2V9	0.136903	2.75969	A0A369K7E1	0.000163869	21.2481	A0A369J8J8	0.942244	0.976035
A0A369J7A9	0.0020597	0.319049	A0A369K7Q5	0.000144516	0.123147	A0A369K3J7	0.00118192	0.312159
A0A369JP65	0.00240202	4.92912	A0A369K6W1	9.80481e-06	8.26656	A0A369J4D6	0.959873	0.989003
A0A369JLC5	6.39969e-05	0.130672	A0A369J3H1	0.391681	1.58989	A0A369K7M9	0.997046	0.99907
A0A369K4W4	0.0056239	1.63113	A0A369JZC7	0.0257629	1.35944	A0A369JYX3	0.00525735	1.76186
A0A369JBM2	0.00625843	0.312564	A0A369JHL0	0.0454622	0.801108	A0A369K9H4	0.0412003	0.576818
A0A369K6L0	0.01558	2.69747	A0A369JL36	0.00028378	0.151121	A0A369J5B2	0.0015054	2.51812
A0A369K248	0.0110697	2.13397	A0A369K762	0.00292088	0.0860124	A0A369JLN8	0.0706669	1.91788
A0A369JDU0	0.0809846	2.39994	A0A369KEF2	0.00883988	0.603945	A0A369JTI5	0.153479	1.48978
A0A369JSV5	0.0157197	0.445722	A0A369IZW7	0.000146838	15.1915	A0A369JS22	0.44865	1.29043
A0A369K7L6	0.000264602	4.51678	A0A369J6V3	3.4476e-06	13.3909	A0A369JVH1	0.0373269	3.02585
A0A369JRS9	0.000327586	7.55966	A0A369JNX4	0.000767101	0.168576	A0A369JZ93	0.438215	1.14937
A0A369K174	0.0038811	4.8819	A0A369K7U1	0.00197022	5.75895	A0A369JKP4	0.0136133	0.241731
A0A369JKC0	0.0041391	1.74353	A0A369JMG4	0.000212203	0.115118	A0A369JKA6	0.00206578	0.309862
A0A369KB97	0.0111048	0.248489	A0A369JHH6	0.00495568	0.421636	A0A369JKC0	0.415511	0.877319
A0A369J7P3	0.00017559	0.458601	A0A369JUH3	0.000404843	19.6388	A0A369JSD1	0.230908	1.85212
A0A369JGS8	0.00468986	0.498968	A0A369KA31	0.871374	1.03207	A0A369J3H1	0.0404926	1.90066
A0A369JX65	0.0184268	6.78884	A0A369JH37	0.00122025	0.044785	A0A369K9F4	0.58971	0.930858
A0A369JQ68	0.0522567	0.623897	A0A369J8W0	0.00260205	0.700412	A0A369JE93	0.999801	0.999801
A0A369JV85	0.000993092	0.321889	A0A369JKP4	0.000807977	10.83	A0A369K6W1	0.000508625	0.159694
A0A369K3T7	0.273019	0.732137	A0A369JKU8	0.000961627	0.354325	A0A369J4G9	0.0149063	3.0949
A0A369JJJ6	0.445755	1.03842	A0A369J9U0	0.00145785	0.163785	A0A369JUL7	0.0131879	1.7957
A0A369K4I0	0.0006864	3.15307	A0A369J8N6	0.0168066	3.58373	A0A369JCT1	0.000517534	0.251112
A0A369K3K2	0.265424	1.18559	A0A369J801	0.000404261	4.31926	A0A369JVP7	0.0610277	1.28192
A0A369K833	0.228374	1.32492	A0A369JQ82	0.774544	0.95369	A0A369JJ95	0.261356	1.57366
A0A369KDP6	0.034737	1.8022	A0A369K4P8	0.000408025	0.176799	A0A369JDW0	0.503201	0.915761
A0A369K8W6	0.741834	0.950185	A0A369J8V8	0.717239	0.955001	A0A369J761	0.00100315	5.49896
A0A369J4I5	0.0105578	0.766977	A0A369K0A7	0.00821482	0.215656	A0A369JLG6	0.179049	0.779352
A0A369J7T2	0.0498482	0.558949	A0A369JPA1	0.0512711	0.642928	A0A369J860	0.409022	1.20022
A0A369K424	0.00177571	3.60023	A0A369K3D9	0.508024	0.916658	A0A369J5L0	0.529028	1.20774
A0A369JYB1	0.272267	1.08926	A0A369KCG7	0.0015641	3.8046	A0A369JV52	0.00798162	1.91869
A0A369JB89	0.0308823	2.36999	A0A369K754	0.0197182	1.69867	A0A369JGZ5	0.00485832	1.78027
A0A369J9U8	0.00124576	12.6573	A0A369JCX5	0.00182111	0.28044	A0A369JQA8	0.952482	0.99538
A0A369JSI2	0.000267627	0.334972	A0A369K761	8.6961e-05	5.18497	A0A369K9R6	0.264315	1.49202
A0A369JH36	0.0233396	0.808848	A0A369JBA9	0.000621874	9.70859	A0A369J5D5	0.016926	0.106274
A0A369JXL8	0.00301666	2.40207	A0A369J9U8	0.460502	1.08098	A0A369K729	0.0214601	2.22164
A0A369JFP3	0.00380984	0.249968	A0A369J1Y0	0.423875	1.19733	A0A369KA31	0.0263082	0.388138
A0A369J712	0.0178681	3.4013	A0A369J479	0.00654599	0.324538	A0A369JFN9	0.0209555	0.595734
A0A369K562	0.000685482	0.28204	A0A369IXZ6	0.000122356	5.74976	A0A369J7C0	0.3992	1.24763
A0A369KC42	0.00998079	6.79208	A0A369K2Y3	0.0367967	0.597067	A0A369K511	0.192121	0.742585
A0A369JNG1	0.283991	1.33606	A0A369K2K3	1.67719e-05	13.1236	A0A369K1T5	0.60555	0.729428
A0A369JR50	0.00069206	2.13833	A0A369K1D2	0.459261	1.04886	A0A369JIA5	0.00886178	1.79876
A0A369JQ82	0.0039949	2.10312	A0A369JYF7	0.0707863	0.759884	A0A369JW07	0.00283702	2.62364
A0A369K3W8	0.190094	1.25091	A0A369K3M4	0.00288407	0.587401	A0A369J2Q8	0.00131975	1.68892
A0A369IZE8	0.00826563	7.01487	A0A369J9B6	0.962425	1.009	A0A369K6K3	0.832976	1.21673
A0A369JIS2	0.00266106	0.655155	A0A369JQR8	0.0756522	1.51963	A0A369JRV1	0.187923	2.19035
A0A369K6V2	0.000182092	0.327515	A0A369KFH7	0.000281636	13.51	A0A369J6Z6	0.0738075	0.639596
A0A369J1Z2	0.00149027	11.9235	A0A369JLG6	0.490027	0.824289	A0A369JHT4	0.000259728	0.38673
A0A369KGM6	0.00280537	0.230645	A0A369JP02	0.00133335	2.76614	A0A369J5E3	0.0567539	1.28397
A0A369JYT2	0.0126573	0.699897	A0A369K7A9	0.000348861	5.78648	A0A369J7B4	0.0981775	1.58306
A0A369K1J0	0.00363399	5.16962	A0A369JNB2	0.0642611	0.357474	A0A369JNW4	0.13667	0.60768
A0A369K9Z4	0.0186926	3.74495	A0A369JKF0	0.00310161	0.186251	A0A369JV41	0.00140385	0.570288
A0A369JBZ8	0.00182377	0.295959	A0A369JMB5	0.000125134	29.2982	A0A369J974	0.131211	1.73593
A0A369JSV0	0.675257	1.02922	A0A369K773	0.00222762	3.69418	A0A369K7W9	0.0062734	2.97339
A0A369JS35	0.000568162	5.50042	A0A369K7X5	0.00883988	1.8534	A0A369JT28	0.43111	0.843104
A0A369JPQ3	0.0015572	0.361617	A0A369JGN9	0.00962399	0.236779	A0A369JD79	0.603144	1.20628
A0A369K2X8	0.000923002	3.71912	A0A369K696	0.00821482	0.396755	A0A369JE22	0.0118645	1.57886
A0A369KAK2	0.00166487	1.7882	A0A369JUM7	9.75505e-06	0.188912	A0A369K2K0	0.000465141	0.458348
A0A369J7J1	0.123577	1.25263	A0A369JWW7	0.0188884	0.234702	A0A369JV27	0.0536419	1.55572
A0A369K754	0.00660696	2.22816	A0A369JS71	0.872114	1.05688	A0A369JDH3	0.475734	1.04486
A0A369JWW5	0.000458829	0.406278	A0A369JB92	0.417004	1.2264	A0A369JR41	0.566202	1.06031
A0A369JRX7	0.000446742	5.55269	A0A369JGW2	0.0180663	0.20953	A0A369K9K8	0.660857	0.882919
A0A369JQL3	0.374602	1.09811	A0A369JJN2	0.000220157	2.00756	A0A369JCI5	0.0257169	2.20506
A0A369JPU7	0.00556799	1.81446	A0A369K7V9	0.00643634	0.144627	A0A369JEV9	0.0200124	3.55165
A0A369JLM9	0.00189088	3.18888	A0A369J0F7	0.0711299	4.47372	A0A369JVM4	0.000301196	2.89532
A0A369K4L7	0.00237214	8.71729	A0A369JBQ9	0.0685853	0.356152	A0A369JBH5	0.0637297	2.79816
A0A369K115	0.0224557	2.50069	A0A369J6Q3	0.000767101	0.131744	G1UJX5	0.0103001	2.63814
A0A369K7V2	0.00860775	8.87191	A0A369JEG0	0.146186	0.833095	A0A369JU37	0.00104736	2.45523
A0A369J9I3	0.0449542	1.99595	A0A369JC22	0.907648	0.966977	A0A369K126	0.0175576	3.14697
A0A369J940	0.848586	0.974912	A0A369J7C0	0.51068	1.196	A0A369J2J2	0.0401276	2.81532
A0A369K1G1	0.0318301	0.754517	A0A369JFB8	1.34938e-05	0.161388	A0A369K1J0	0.0334307	3.13135
A0A369K557	0.0357861	1.83164	A0A369JUM6	0.000444791	106.072	A0A369K229	0.000614589	0.188983
A0A369JUS1	0.000317798	0.40439	A0A369JRX8	0.000318886	2.55196	A0A369JJ15	0.904403	1.01354
A0A369K6U8	0.000584214	2.22864	A0A369JJS5	0.00084798	3.15408	A0A369JME0	0.0216315	0.557044
A0A369JA40	0.680335	0.919409	A0A369J0W4	0.000444778	0.570163	A0A369KAK2	0.099761	0.813403
A0A369J7U1	0.00535178	0.26764	A0A369J678	0.368369	0.86152	A0A369JHH6	0.000722709	12.7056
A0A369JI95	0.00281633	2.1321	A0A369K1J0	0.0412947	1.65093	A0A369KCE8	0.223686	1.59284
A0A369JV96	0.00376257	8.0309	A0A369JF34	0.028678	0.0921478	A0A369KAB3	0.696072	1.14761
A0A369JFS3	0.00026978	0.424561	A0A369JUZ0	0.549447	1.10596	A0A369K6S2	0.00125497	4.70453
A0A369J7U8	0.785633	1.03429	A0A369JTG6	1.33937e-06	5.77478	A0A369JH57	0.0486985	1.77227
A0A369K6L4	0.0136683	0.67926	A0A369J6N5	0.0356591	0.748836	A0A369JZ07	0.000732024	1.97498
A0A369K4T8	0.372593	1.14026	A0A369KE66	0.00100106	3.09012	A0A369K1K9	0.654884	1.06091
A0A369K4S1	0.00880826	0.255823	A0A369K071	3.48796e-05	3.07496	A0A369JJR4	0.00436694	2.51171
A0A369KCE2	1.38562e-05	20.666	A0A369JGX8	0.000363362	9.4629	A0A369J7U8	0.0234076	0.6549
A0A369JDK1	0.0082666	4.75789	A0A369JUX0	0.00842974	1.48039	A0A369JFQ1	0.0019926	0.459598
A0A369K396	0.000413921	11.6734	A0A369J907	5.278e-05	4.20417	A0A369K1H7	0.0189964	0.415625
A0A369K888	0.000708738	3.89142	A0A369JNS7	0.0955303	0.718482	A0A369KCZ1	0.30007	1.68919
A0A369JUZ0	0.258858	1.2355	A0A369K648	0.00666282	0.3113	A0A369JY90	0.133771	0.708813
A0A369K4G6	0.0236971	1.9706	A0A369K0M5	0.0033441	0.450281	A0A369JU17	0.0251402	0.639977
A0A369JHT1	0.0088462	0.810962	A0A369JT04	0.00334133	1.76713	A0A369K0Q3	0.0979492	1.30814
A0A369JWA8	0.000495624	10.3687	A0A369JM05	0.00250738	4.5093	A0A369JD67	0.152709	0.817557
A0A369JND2	0.0201192	3.40801	A0A369JTP6	0.84645	0.971703	A0A369J9V6	0.0851072	1.88474
A0A369JNE5	0.000284492	0.353312	A0A369K729	0.196185	1.2315	A0A369JRG0	0.329492	1.08014
A0A369JA37	0.609912	0.912697	A0A369J6C1	0.00104174	0.252398	A0A369JYQ7	0.303446	1.60703
A0A369JZG8	0.000550542	10.1904	A0A369JBI8	0.00104174	0.300863	A0A369JZN7	0.0198783	6.0773
A0A369JUX0	0.104919	0.832874	A0A369JRP0	0.000361917	17.5405	A0A369JYB4	0.844915	0.956548
A0A369JFC9	0.00404631	2.41623	A0A369J343	2.09996e-07	17.2515	A0A369JTG6	0.0698749	0.725429
A0A369JZC7	0.158545	0.727007	A0A369K225	0.0131389	0.292306	A0A369JYC5	0.179526	1.17618
A0A369J780	0.0431537	9.47415	A0A369J751	0.0173415	1.41939	A0A369K966	2.43666e-05	0.346655
A0A369J6C6	0.0030018	2.11303	A0A369JZL6	0.00059766	8.60746	A0A369J1Y0	0.0721992	0.680233
A0A369JRV6	0.155198	1.25605	A0A369JZ34	0.885471	1.01601	A0A369JGM7	0.00419197	2.81885
A0A369KH81	0.00130618	14.3171	A0A369J175	0.000715736	0.0918056	A0A369J678	0.0480555	0.693263
A0A369JI63	1.09566e-05	0.299568	A0A369K213	0.000335997	0.237483	A0A369J5K1	0.0510386	1.25315
A0A369K1T5	0.572256	1.26341	A0A369JLZ8	0.000699151	5.41003	A0A369IYB6	0.079476	0.821438
A0A369JYF5	0.621579	0.965422	A0A369JKP0	0.00264958	0.100097	A0A369K7E1	0.355954	0.843115
A0A369JLU7	0.00197201	26.2451	A0A369J7U8	0.0268705	1.57931	A0A369K4T9	0.217031	1.38242
A0A369K725	0.157287	1.27601	A0A369JPL8	0.00145188	0.14652	A0A369K3J5	0.105531	0.80114
A0A369JMJ8	0.0202359	0.601162	A0A369K4X5	0.176591	0.514603	A0A369KCY4	0.24161	1.22752
A0A369KGZ5	0.00466296	0.452361	A0A369K712	0.563535	0.904125	A0A369JWP7	0.00419262	2.09881
A0A369JFT9	0.000102863	7.86706	A0A369K928	0.000119851	4.06969	A0A369JN54	0.00118192	0.205885
A0A369J763	0.0126113	0.513758	A0A369K5P4	0.000245097	5.77306	A0A369JNB3	0.711671	0.933827
A0A369JWY1	0.00966901	2.45218	A0A369JB89	0.736289	1.06291	A0A369J2L5	0.0207405	0.36778
A0A369JAJ0	0.000316872	0.221848	A0A369K2H4	0.00429307	3.84931	A0A369JII8	0.0459106	3.97897
A0A369JL95	0.00104174	11.4812	A0A369JQI1	5.41188e-06	0.0789847	A0A369K715	0.0404926	1.41781
A0A369K8F9	5.63253e-05	11.7835	A0A369J9J3	0.00306425	0.151679	A0A369IZW7	0.329492	0.413095
A0A369J5C3	0.00366233	0.618301	A0A369JG85	0.000621874	11.4432	A0A369K3K2	0.658763	0.88593
A0A369JI35	0.00114197	6.04955	A0A369JLD7	0.000148557	3.98692	A0A369J2C9	0.304304	1.23088
A0A369JJ70	2.14645e-05	0.495317	A0A369JA40	0.89619	0.977349	A0A369JQD5	0.00680592	2.091
A0A369K0R9	0.000323323	7.00583	A0A369JKQ9	0.00216689	2.04813	A0A369JDS5	0.81064	1.04611
A0A369K5W8	0.00328216	0.430719	A0A369JQM8	0.0241837	0.624555	A0A369IYM9	0.00563969	0.608916
A0A369JFC3	0.00163733	0.468227	A0A369JGP2	0.00113828	1.40298	A0A369J9G0	0.0087967	0.638886
A0A369JM22	0.00402314	0.713999	A0A369JZP7	0.000818183	1.64792	A0A369J7U0	0.0260509	1.3856
A0A369K622	0.00879243	0.534263	A0A369JK54	0.00105754	0.0941756	A0A369JHL0	0.908351	0.979612
A0A369JRV0	0.000671691	0.0226298	A0A369JT87	0.00161172	0.135736	A0A369JGU6	0.0878396	0.787067
A0A369JXP5	0.000840621	3.02276	A0A369JDU0	0.235228	0.824624	A0A369JD10	0.0156997	0.566448
A0A369K9I9	0.010775	0.6949	A0A369JQL3	0.210163	1.21634	A0A369JBV7	0.00317573	1.58607
A0A369IZN7	0.00274424	12.7666	A0A369JU17	1.03557e-05	5.1144	A0A369J0F7	0.953204	1.01782
A0A369JX94	0.00742887	0.580004	A0A369KF75	0.00597329	0.902662	A0A369JMB5	0.73531	1.07133
A0A369JKI8	0.276293	5.67019	A0A369JIE4	0.0106746	1.68939	A0A369J097	0.197068	0.801952
A0A369JJN2	0.102654	1.26727	A0A369JDC9	0.235739	1.32928	A0A369JDY0	0.0125003	2.88868
A0A369KBK0	0.0367417	0.709364	A0A369K162	0.00233338	0.630312	A0A369JFN4	0.343962	1.19593
A0A369JHY4	0.00655023	0.568369	A0A369J7L9	0.00021875	17.5618	A0A369K2B6	0.647331	0.905824
A0A369J5F3	0.00581045	2.14887	A0A369K377	0.000468373	0.230539	A0A369KF63	0.217261	1.83373
A0A369IYB6	0.001083	1.6516	A0A369JQD2	0.0548781	2.01175	A0A369J8V8	0.00146944	2.35521
A0A369K297	0.00345766	0.469374	A0A369JKD1	0.0639492	0.625803	A0A369JKG5	0.107492	1.55756
A0A369JTU5	2.62182e-05	0.27358	A0A369JM31	3.17583e-06	19.6912	A0A369JRZ8	0.0737682	1.53444
A0A369JSB5	0.386881	0.824145	A0A369JW66	0.00317065	0.148755	A0A369K972	0.884593	0.984826
A0A369JK98	0.000251887	0.200763	A0A369JMZ9	0.00386886	0.104189	A0A369JR80	0.278965	1.09621
A0A369K5E4	0.0516312	1.26824	A0A369JWR3	1.74213e-06	6.80864	A0A369K211	0.00344029	3.25288
A0A369JV27	4.10662e-05	3.45852	A0A369JVH1	0.0160749	0.258699	A0A369JXQ4	0.0174	0.667496
A0A369KA27	0.487254	1.05328	A0A369JK87	0.005097	0.0408558	A0A369JB54	0.679602	1.04834
A0A369KB35	0.00133635	3.82583	A0A369J6R4	0.020693	0.0647115	A0A369JQD2	0.923058	1.05095
A0A369K1M4	0.00491151	1.40005	A0A369K9I9	0.160026	1.18631	A0A369JZ34	0.00967069	3.68011
A0A369JJS6	0.000117962	7.8069	A0A369J2A5	0.00718824	0.233395	A0A369JB92	0.107567	2.47663
A0A369JLF2	0.00103064	17.7221	A0A369JSR9	0.00345954	0.450654	A0A369JMY5	0.931212	0.970821
A0A369K359	0.0174616	3.56563	A0A369JHZ7	0.00373483	0.248022	A0A369JTJ3	0.947686	1.03016
A0A369JLL0	0.00158427	0.226957	A0A369JEP8	0.00208337	0.0789722	A0A369JNB0	0.0213069	0.49146
A0A369JAE3	0.000839194	1.47767	A0A369JPD1	0.00175949	9.45999	A0A369JPG3	0.327587	1.20797
A0A369JDC9	0.0905595	1.679	A0A369K8J5	0.00145188	0.138294	A0A369JK46	0.00200724	2.77624
A0A369K338	0.000944751	0.684497	A0A369JWF8	0.00340606	0.0579386	A0A369JGI9	0.190938	0.73238
A0A369JXM1	0.00655539	1.70216	A0A369K5Z5	0.00043121	0.0595106	A0A369K0Z5	0.151621	1.45401
A0A369JW23	0.415462	0.89524	A0A369JCT5	0.000655509	4.57717	A0A369JCS1	0.223062	0.714656
A0A369JAZ4	0.0171755	1.37982	A0A369K9K0	0.000129712	2.61946	A0A369JZL6	0.00631305	9.51896
A0A369JZP7	0.0744822	1.24777	A0A369JUR4	5.04923e-06	6.10866	A0A369JYP0	0.0305928	2.17864
A0A369JGP2	0.000876631	1.57655	A0A369KA45	0.00165252	0.0564132	A0A369JBQ9	0.00760351	0.389701
A0A369JLD3	0.000404754	2.50089	A0A369JPD6	0.000146778	2.04875	A0A369JK56	0.11387	0.578303
A0A369K119	0.00926013	1.60576	A0A369JZM2	0.00381503	1.82877	A0A369JAT5	0.139681	1.98808
A0A369JE72	0.00548574	2.90277	A0A369K8U8	0.0258753	0.779762	A0A369J175	0.032585	0.656664
A0A369JVN4	0.0234987	0.558104	A0A369JT34	0.00547912	0.266114	A0A369J537	0.0140468	0.327199
A0A369JP02	0.000581613	1.76104	A0A369JWP4	0.00070305	4.83637	A0A369JLD7	0.590619	1.18822
A0A369JFB3	0.000304574	0.118564	A0A369JB20	0.00255347	0.112884	A0A369KAS3	0.0677869	1.57234
A0A369JGR9	0.000887024	2.81055	A0A369JDX5	0.000569773	0.0825303	A0A369K7Q5	0.0832919	1.51472
A0A369JE22	9.7827e-06	3.72845	A0A369J312	0.000148587	2.59669	A0A369JG10	0.591264	1.14324
A0A369JQX6	0.00963085	2.20534	A0A369JSV5	0.00841434	0.647379	A0A369K654	0.162024	0.824284
A0A369J5N3	0.000136916	0.339969	A0A369KGG8	0.0283897	0.499588	A0A369JEP8	0.00643368	3.64584
A0A369JKN9	0.00709947	0.209591	A0A369JFN7	1.03557e-05	7.21334	A0A369JDE1	0.103531	1.63242
A0A369J751	0.000437574	7.70004	A0A369JBK4	0.0324283	0.600081	A0A369J4M5	0.0182202	0.825405
A0A369JT04	0.00112707	2.32716	A0A369JUV8	0.0394971	0.108531	A0A369JZC7	0.0651188	0.534782
A0A369K0M8	0.000110567	0.364592	A0A369JGI9	0.0106932	0.100779	A0A369J427	0.00663208	4.75713
A0A369JP58	0.427292	1.11247	A0A369JY05	0.000334382	5.96709	A0A369K3M4	0.542307	0.917043
A0A369K5S6	0.00744987	12.0858	A0A369K0Z5	0.0028644	2.04194	A0A369KCF4	0.0621483	0.542111
A0A369K3J7	0.59219	0.955826	A0A369JV56	0.0001768	0.255988	A0A369JPL3	0.0067873	2.64722
A0A369JLT2	0.0103767	1.63285	A0A369JYB1	0.0222602	0.807463	A0A369JCQ2	0.633333	0.943221
A0A369JZR5	0.0194335	5.68025	A0A369JGA3	3.63403e-06	37.3468	A0A369K712	0.0192038	6.44072
A0A369K5H9	0.233053	0.88789	A0A369JMT3	0.0227393	0.244844	A0A369K7V9	0.0015054	0.443622
A0A369J4T7	0.000542677	5.17998	A0A369JLT0	0.00231902	0.178795	A0A369J9B6	0.707929	1.09956
A0A369JM39	0.0010317	0.310926	A0A369JT49	0.0309182	0.660153	A0A369JKF0	0.000912605	4.09235
A0A369K8P5	0.0497955	0.708525	A0A369J9V9	0.145398	0.756723	A0A369K1D2	0.00631305	0.403649
A0A369J654	0.00126869	0.148792	A0A369JP73	0.00029156	0.355371	A0A369J8W0	0.00144842	0.360195
A0A369KCZ8	0.00503667	7.55648	A0A369J4Z3	1.92931e-06	7.25056	A0A369JCX5	0.0108085	3.30401
A0A369J6D5	0.490259	0.927929	A0A369JFL8	0.000257982	4.16486	A0A369JP34	0.419902	0.839666
A0A369KCE8	0.00148589	4.45276	A0A369K1H6	0.00166379	0.238079	A0A369K7X5	0.0119252	0.641656
A0A369IYH2	0.000514963	2.04258	A0A369K887	0.000553535	3.78601	A0A369JPL8	0.0361956	1.38964
A0A369J9C6	0.423196	20.4424	A0A369K080	0.000282975	0.293309	A0A369J3F6	0.111675	1.28189
A0A369K9T0	0.448915	0.758173	A0A369J5F3	0.105109	1.23092	A0A369JLG1	0.486823	1.16249
A0A369JYY2	0.00395161	20.6106	A0A369JKN5	3.0206e-06	3.55096	A0A369J9J3	0.0214524	1.70678
A0A369K3T2	0.000313321	2.76946	A0A369JLG1	0.00172883	9.57445	A0A369K836	0.491957	1.22766
A0A369JUX2	0.171288	1.20111	A0A369JKE1	1.45087e-05	3.51011	A0A369JSC4	0.00294162	2.43305
A0A369K6V9	0.00251263	0.470912	A0A369J4V0	0.00666282	0.286046	A0A369JH37	0.0070258	1.81808
A0A369K0L6	0.00616752	0.731738	A0A369JER3	0.00292088	0.226353	A0A369JT34	0.154035	1.28034
A0A369KC16	0.020911	6.48052	A0A369KGM6	0.364447	0.610848	A0A369J9U0	0.131211	1.17675
A0A369J8K5	0.331423	0.893646	A0A369JME0	0.00226858	2.17909	A0A369JRF4	0.634573	0.929719
A0A369JDC7	0.003072	2.14203	A0A369KDR0	0.0019722	0.0902109	A0A369JGA3	0.000514191	0.279048
A0A369JQ94	0.000127954	0.455296	A0A369KCF7	0.000833237	0.062709	A0A369JN22	0.000444326	6.03836
A0A369JR44	0.166321	1.09393	A0A369JW83	0.000521163	2.27321	A0A369JFB8	0.652317	0.708501
A0A369JC85	0.00394515	18.0071	A0A369JVF9	0.000390672	0.157156	A0A369JNX4	0.00690601	1.57568
A0A369J5Z5	0.152248	0.777378	A0A369K147	0.00143069	1.97629	A0A369J9V9	0.488166	0.899612
A0A369JFZ1	0.0235135	1.93757	A0A369JLW7	7.84511e-05	7.02946	A0A369JU78	0.0231374	2.06329
A0A369J6N0	0.000324108	18.5854	A0A369KAG6	0.000256246	0.301085	A0A369JKQ9	0.159469	1.36728
A0A369JT56	0.000173415	0.110334	A0A369KCF4	0.0388982	0.263433	A0A369J8N6	0.000842114	0.387918
A0A369JN44	0.0260942	1.64397	A0A369KAN0	0.0124748	0.149176	A0A369K7U1	0.688889	0.825009
A0A369KBL7	0.000569527	6.00122	A0A369JGZ0	0.0021361	5.18434	A0A369JJN2	0.0637462	0.63125
A0A369JQC7	0.156924	0.85429	A0A369JKC6	0.000315745	0.102085	A0A369K696	0.0271736	1.71486
A0A369K1P7	0.0639939	0.746717	A0A369JP07	0.0206937	1.73115	A0A369JUB4	0.0551415	0.61566
A0A369K7X5	0.185668	1.18925	A0A369JVZ4	4.98689e-05	12.736	A0A369JRX8	0.328036	0.893134
A0A369JFL7	0.00800783	2.56712	A0A369JNG1	0.5484	0.88454	A0A369JKU8	0.0274733	2.36263
A0A369K7Q0	0.0300301	2.93483	A0A369JF14	0.0285321	0.148632	A0A369J6C1	0.0216315	0.673953
A0A369K8U3	0.326402	1.08538	A0A369JJC8	0.00806105	0.110921	A0A369JG85	0.0289752	0.662594
A0A369JDK2	0.437709	1.09467	A0A369JDW7	5.41188e-06	0.196458	A0A369JMG4	0.201728	1.16367
A0A369JLR5	0.000930668	1.69147	A0A369K772	0.000441065	1.7327	A0A369JMZ9	0.282144	0.71951
A0A369J0H4	0.00825164	0.632442	A0A369JQV2	0.000262681	13.8673	A0A369K2Y3	0.0277495	2.00084
A0A369JTR1	0.000237886	5.38748	A0A369K981	4.61021e-05	10.0082	A0A369JB89	0.0373208	2.22973
A0A369JPY7	0.0046053	0.500155	A0A369JTZ5	0.00113828	0.0677747	A0A369JI60	0.0835881	2.1164
A0A369JGK3	0.367412	0.895011	A0A369JVF6	0.0135292	1.45478	A0A369JWI8	0.000732024	2.76754
A0A369JQH6	0.0263465	4.50011	A0A369K7W0	0.0049738	0.208626	A0A369K0G5	0.986943	0.993531
A0A369JJ14	0.00131572	2.61863	A0A369J8A6	0.0179778	0.464465	A0A369K986	0.0555584	1.83658
A0A369KC62	0.13777	0.541223	A0A369JU80	3.63403e-06	0.281917	A0A369JT04	0.0579217	1.31692
A0A369K542	0.00123817	9.64913	A0A369K6V9	0.42715	1.11055	A0A369JUR4	0.167307	0.875286
A0A369KAX2	0.0759319	1.1914	A0A369JFV3	0.00303172	0.221926	A0A369JSB5	0.324487	0.809299
A0A369JIE4	0.523744	1.13208	A0A369JJ62	0.0444091	0.545425	A0A369K034	0.00930853	1.5488
A0A369JKF8	0.000944751	10.5373	A0A369K2V7	0.00332907	0.197434	A0A369JUF3	0.242054	0.82657
A0A369JQA8	0.00673872	2.67772	A0A369J9S9	0.00643634	0.238867	A0A369KFH7	0.00395372	0.547683
A0A369JML8	0.000251887	0.44629	A0A369JXL8	0.221716	0.875987	A0A369JXS2	0.214546	1.25826
A0A369JCF3	0.140222	1.55413	A0A369JAR4	0.016117	0.586678	A0A369KEF2	0.00144842	0.576898
A0A369JD49	0.00352605	20.3131	A0A369JQB6	0.00796865	0.77211	A0A369K773	0.673016	0.907359
A0A369JDW0	0.00158427	3.45806	A0A369JMY5	0.000113897	4.41549	A0A369JEG0	0.364181	1.09541
A0A369K5Q4	0.0077821	1.87303	A0A369JMA3	0.191152	0.721841	A0A369K071	0.164063	0.807915
A0A369K0G5	0.0312967	4.7107	A0A369J7S8	0.00117651	0.336654	A0A369JJJ2	0.0536059	1.43719
A0A369JA69	0.000189761	0.351844	A0A369JYS8	0.000961627	46.3839	A0A369JUL3	0.000860664	2.97664
A0A369JTV5	0.00178203	0.280378	A0A369JY10	0.00142149	2.76147	A0A369JUH3	0.953204	1.01317
A0A369JRX8	6.54551e-05	2.27924	A0A369K1T7	0.00117651	2.39463	A0A369JGX8	0.0236055	2.27809
A0A369JMB9	0.000690864	1.89848	A0A369J0G3	0.00169075	2.0465	A0A369K2G0	0.235451	0.644383
A0A369JL99	0.0407472	4.26152	A0A369JDE1	0.00858615	0.0793351	A0A369JXN7	0.91659	0.95284
A0A369JPD6	0.000300659	1.79023	A0A369JVN3	0.0206821	0.118507	A0A369KAR5	0.0207716	1.67329
A0A369K827	0.000499472	0.297604	A0A369K994	0.00340606	2.79895	A0A369JUM7	0.00740958	2.09963
A0A369K6D0	0.000265834	0.270739	A0A369K1R4	0.0149712	13.9496	A0A369JZB8	0.268787	1.41706
A0A369JZN7	0.000626241	15.7958	A0A369J5L2	0.000457789	0.469779	A0A369JJS5	0.0109531	0.353653
A0A369K7Q9	1.52758e-05	44.1222	A0A369K3A5	0.00050436	0.0537627	A0A369K039	0.0721568	1.50555
A0A369KDX0	0.00025643	6.74539	A0A369JHT1	0.189771	0.911367	A0A369K0A7	0.0881644	1.47811
A0A369JRU0	0.00361374	0.701045	A0A369JXM0	0.001195	0.251976	A0A369JA40	0.732735	0.940717
A0A369K845	5.76902e-05	22.8579	A0A369JQ54	0.00156279	0.0996072	A0A369J8K5	0.0319085	0.638503
A0A369K1D1	0.0185108	3.06915	A0A369JDR4	0.000145715	5.63506	A0A369JSR1	0.00861725	0.759156
A0A369J3U0	0.00114943	10.1411	A0A369K0F5	0.0239808	2.01989	A0A369K754	0.256438	1.31171
A0A369JKH2	4.92503e-05	6.76412	A0A369K927	0.0209535	2.88755	A0A369JNS7	0.329492	1.19657
A0A369J5B2	9.7827e-06	8.31638	A0A369K3N9	0.00285974	0.0921342	A0A369JBA9	0.00172565	0.4885
A0A369JP07	0.00433248	4.95114	A0A369K297	0.634131	0.972886	A0A369K762	0.0106686	0.630853
A0A369J6T7	0.000279823	2.18949	A0A369KB87	0.00113101	2.84198	A0A369JTP6	0.14089	0.64197
A0A369KCD9	0.042072	1.60072	A0A369J9C6	0.420646	22.3115	A0A369JTW7	0.109849	1.33503
A0A369K2T8	0.155838	0.492038	A0A369J8K5	0.0283053	1.39959	A0A369JUM6	0.297655	1.59773
A0A369JP67	0.0776925	1.19005	A0A369JGM9	0.0183531	6.03812	A0A369K6N7	0.00191156	1.6864
A0A369J8N6	0.155564	1.39019	A0A369IZ25	0.00638486	0.576245	A0A369K7A9	0.447625	0.738828
A0A369K772	0.0206712	0.791189	A0A369K791	4.06396e-05	2.35818	A0A369JDU0	0.0507722	2.91035
A0A369JXT6	0.0052374	1.90163	A0A369JUX2	0.00337419	1.26038	A0A369J9S9	0.986943	1.00332
A0A369JU46	0.00268243	2.11122	A0A369KBH4	0.0001985	0.126469	A0A369JQ82	0.0401132	2.20525
A0A369KA09	0.546893	1.14256	A0A369JIN2	0.00223045	0.0200636	A0A369JE73	0.152991	2.53339
A0A369K0G7	0.00357592	0.378591	A0A369K9R8	1.19721e-05	5.05473	A0A369K0M5	0.685814	0.964408
A0A369JNV0	0.0212345	5.66272	A0A369JUH9	0.035244	1.46155	A0A369J0W4	0.0153563	0.651394
A0A369JME0	0.0534146	1.21385	A0A369JPZ0	0.00166994	0.115459	A0A369JCZ2	0.0214338	1.2277
A0A369JWV1	0.00158427	0.240208	A0A369K4X3	6.53129e-06	0.258673	A0A369K8J7	0.0931937	3.255
A0A369JCZ6	0.0147229	2.13902	A0A369JGS8	0.0552055	0.61982	A0A369KE66	0.0153563	1.65444
A0A369JAM5	0.0127753	0.673299	A0A369K5H9	0.240579	1.09936	A0A369JGG0	0.038827	0.384289
A0A369JAC5	0.0100888	0.814696	A0A369JLR5	0.0025327	1.26938	A0A369JRQ8	0.0111927	3.28229
A0A369JZM2	0.000381847	3.3807	A0A369K0F4	7.5466e-05	0.102681	A0A369J479	0.959297	1.01426
A0A369JSC7	0.00579771	0.224351	A0A369JX03	0.251206	1.29731	A0A369K8J5	0.472225	1.19194
A0A369JJF8	0.00663616	0.482706	A0A369JIU0	0.000777085	0.0412676	A0A369JUZ0	0.299985	1.11713
A0A369K7Y9	0.285585	0.871902	A0A369JJM0	0.00232415	0.0576885	A0A369J6Q3	0.18629	1.24469
A0A369JTN7	0.000941376	8.02317	A0A369JFW8	0.00438749	2.25838	A0A369KGM6	0.0101266	0.377581
A0A369JVF6	0.0024297	2.80028	A0A369K912	0.00135398	2.29465	A0A369JNM2	0.0751314	1.54137
A0A369JIK0	0.0012225	37.7262	A0A369JDU1	0.000159209	5.37851	A0A369JDW2	0.0155736	0.378248
A0A369J7B8	0.00333427	10.0998	A0A369JRW7	0.000939165	3.32992	A0A369J7L9	0.000120554	0.485904
A0A369JWP7	8.85035e-06	6.92606	A0A369JYT2	0.407866	0.893338	A0A369JW66	0.121023	1.4675
A0A369JKQ9	5.23949e-05	2.80037	A0A369JNP8	0.00019916	0.302798	A0A369JPD6	0.16342	0.873819
A0A369JKH0	0.00010013	9.37392	A0A369JGY6	0.000108684	0.145663	A0A369JYS8	0.00216971	0.122948
A0A369JNU1	2.60313e-05	14.0447	A0A369JW23	0.14681	1.31185	A0A369J6N5	0.00909724	2.26097
A0A369K7Z1	0.00132669	5.26391	A0A369K0W1	0.000274962	0.479748	A0A369K225	0.570988	0.914252
A0A369K354	0.000415458	0.322964	A0A369JQY3	5.11435e-05	54.2621	A0A369JVZ4	0.017711	0.604974
A0A369K6G7	0.373128	0.844798	A0A369JB12	0.0108393	1.64619	A0A369J4Z3	0.436105	0.873939
A0A369K5R4	0.00114197	0.589787	A0A369JDL9	4.35202e-05	0.16877	A0A369JGM9	0.00209475	0.393324
A0A369J9X3	0.00340497	23.2376	A0A369JWH5	0.000244098	0.040267	A0A369K761	0.00188232	0.568426
A0A369JZ73	0.00483734	0.60207	A0A369K024	4.29269e-05	2.04698	A0A369J2A5	0.234184	1.26069
A0A369KCZ1	0.00158427	4.96914	A0A369JYF5	0.0103519	0.746733	A0A369K3K9	0.10193	1.74954
A0A369JFQ1	0.0111483	2.12812	A0A369JMN6	0.000444791	2.26547	A0A369JUX0	0.0131627	0.562605
A0A369JP22	0.000574277	12.2096	A0A369J8D4	0.0122132	0.512172	A0A369K9L8	0.466661	1.29591
A0A369J2Q8	0.00145591	7.87415	A0A369JSB5	0.939904	1.01834	A0A369JB20	0.460294	1.08969
A0A369JPR2	0.000935736	0.606363	A0A369JPI3	8.39262e-07	10.9192	A0A369K8U8	0.00363569	5.21087
A0A369J565	0.580704	1.02938	A0A369JR94	9.53598e-05	1.80979	A0A369KF75	0.0202663	1.36042
A0A369JX03	0.787268	1.05043	A0A369JFE9	2.15845e-05	0.304781	A0A369JIC0	0.00363569	1.62763
A0A369J0I9	0.00102116	0.453837	A0A369JZW1	0.000327274	0.0497349	A0A369JQM8	0.0313415	1.59157
A0A369JM86	0.00540055	0.709196	A0A369K2K8	0.000147757	10.5208	A0A369K080	0.000423189	0.506152
A0A369K147	0.00285224	1.50065	A0A369K238	0.000800877	0.066985	A0A369K4P8	0.00139137	6.28525
A0A369JGZ7	7.4952e-05	6.49357	A0A369KC13	0.000694398	4.96049	A0A369K162	0.00357165	2.30184
A0A369J5D4	0.000512636	35.9983	A0A369K4T8	0.568841	1.09088	A0A369JWV9	0.00715192	2.4535
A0A369JKA6	0.00114943	1.89444	A0A369J5W0	0.00638608	0.434538	A0A369K4M7	0.194709	0.656829
A0A369K287	0.000235492	21.6282	A0A369JJ55	0.00053313	3.31969	A0A369K213	0.0256123	2.05257
A0A369JAG2	0.000170966	0.31651	A0A369K9E4	0.00799874	0.52457	A0A369K5P4	0.000301196	0.308769
A0A369K1H0	0.0461246	0.611005	A0A369JDL5	0.00502926	0.0695342	A0A369JJC8	0.0372189	2.20797
A0A369J7G7	0.000279639	3.06804	A0A369JMB9	0.0580196	1.17076	A0A369J8K6	0.00829715	2.9909
A0A369JQS8	0.0130121	1.65627	A0A369JVD2	0.00013316	20.8416	A0A369JAS5	0.33205	1.23878
A0A369J966	0.0699031	1.34142	A0A369JJD2	4.73126e-06	0.170688	A0A369JLZ8	0.00147299	0.506998
A0A369JAD6	0.000227126	0.57053	A0A369K052	0.000234307	3.50358	A0A369KCU1	0.312394	1.43805
A0A369JJ31	0.00215919	20.9127	A0A369KFJ0	0.000278415	0.130256	A0A369JSR9	0.0256964	0.774258
A0A369JJS5	0.313015	1.11545	A0A369JMS6	0.00222762	2.80368	A0A369JP53	0.0630003	0.773899
A0A369J0F7	0.0714316	4.55346	A0A369JYE8	5.41188e-06	0.117254	A0A369JV56	0.0025608	2.00996
A0A369JN93	5.09131e-06	0.383508	A0A369K155	6.83272e-05	0.0409143	A0A369K648	0.317486	1.23937
A0A369JP43	0.00017559	11.3711	A0A369JN44	0.120368	1.27283	A0A369K928	0.899568	0.975509
A0A369K0Z5	0.00010734	2.969	A0A369J8C7	0.00118127	0.153447	A0A369KCF7	0.00450565	3.44389
A0A369K136	0.00602868	0.500223	A0A369JKD5	0.00182743	0.0406198	A0A369JQI1	0.000138244	3.42222
A0A369JCP1	0.000170966	6.54229	A0A369JH36	0.000965501	0.634067	A0A369K5Z5	0.00193536	3.83048
A0A369JQW7	0.000849549	0.505063	A0A369JPR7	0.000141563	2.16616	A0A369JP73	0.00434148	0.393081
A0A369JN29	0.000635138	0.332717	A0A369J6Q4	0.00202061	0.57076	A0A369JMH7	0.0110718	4.05983
A0A369JXJ2	0.000358816	3.71033	A0A369K488	3.17583e-06	4.83847	A0A369JHI1	0.126009	2.0297
A0A369JK78	0.00552909	0.166802	A0A369K0G2	0.00011873	0.165077	A0A369JGP2	0.207334	1.12372
A0A369K966	0.0265493	1.7981	A0A369J9M1	0.000275122	0.192189	A0A369JE91	0.0186132	2.55179
A0A369J6Q2	4.60516e-05	0.791394	A0A369JSU9	1.66731e-06	4.0849	A0A369JBI8	0.908461	0.980807
A0A369JXF6	0.0108204	1.39848	A0A369JSV0	0.0555419	0.761972	A0A369J907	0.000720524	0.399063
A0A369JRY3	0.0685673	0.841919	A0A369K5E4	0.137901	0.872496	A0A369KAG6	0.00156251	1.80537
A0A369JM88	0.000620747	2.93621	A0A369JHY6	0.00230436	0.403892	A0A369J9U8	0.00476203	11.7091
A0A369JFP4	0.00122623	0.703039	A0A369JB43	6.27008e-05	2.20246	A0A369JWP4	0.00553918	1.60424
A0A369JQD2	0.00347546	2.11424	A0A369JWM8	0.0672885	1.24028	A0A369K9I9	0.0065719	0.585763
A0A369K2I0	0.0640443	1.11195	A0A369JAV4	0.00329706	0.196721	A0A369J3V1	0.00446998	3.95718
A0A369J8W6	0.0041391	1.84696	A0A369JLD3	0.0555692	0.82892	A0A369J8G8	0.214546	7.51471
A0A369JUR0	0.000514963	10.8986	A0A369J7Y4	0.000945862	1.97454	A0A369JY10	0.000138244	0.190702
A0A369KAM4	0.00574329	7.01727	A0A369JG59	0.000341675	0.270762	A0A369K887	0.00143276	0.261051
A0A369K6M4	0.00119057	0.384641	A0A369JB62	2.13172e-06	0.0272847	A0A369JAR4	0.0187081	1.85368
A0A369K4B6	0.00097667	3.42275	A0A369J6D5	0.0335045	0.779209	A0A369K377	0.708639	1.04305
A0A369JN02	0.000390139	5.80145	A0A369JG77	1.10556e-05	5.88772	A0A369J343	0.00539452	0.426042
A0A369JMI2	0.00500574	17.3516	A0A369JGB2	0.0183862	0.594955	A0A369JZM2	0.0236711	1.84862
A0A369J0G3	0.00156685	2.06786	A0A369KBM1	0.00113778	3.4121	A0A369JCT5	0.00124418	0.498665
A0A369K289	0.00202971	15.5491	A0A369K582	0.00222684	3.86087	A0A369JFL8	0.00419262	0.706854
A0A369JR94	0.382007	1.03151	A0A369K338	0.566554	1.10424	A0A369K6R5	0.0318092	0.86774
A0A369J8P1	3.76078e-05	0.449641	A0A369JMA2	0.000642173	0.502529	A0A369K5R2	0.997046	0.99781
A0A369JNX8	0.00598155	0.52738	A0A369J4I5	0.132874	0.737201	A0A369JT87	0.020052	1.61681
A0A369JAB8	0.449768	0.909599	A0A369J8C2	3.24691e-05	4.06872	A0A369JJH2	0.000580297	2.27637
A0A369JE01	0.000289287	3.88398	A0A369JV11	5.04923e-06	0.204358	A0A369K7M4	0.00417979	1.99584
A0A369K4E3	0.000104647	4.20079	A0A369JJ99	0.00230436	0.111176	A0A369J312	0.0373269	1.56825
A0A369JB12	0.0024297	2.01576	A0A369JCS7	0.0197182	0.134623	A0A369JY05	0.184155	1.19815
A0A369K071	0.000160727	2.4843	A0A369JC20	0.000207844	0.0641991	A0A369K1H6	0.0998606	1.21268
A0A369JXU0	0.635111	1.05268	A0A369KGY7	0.00185145	0.230021	A0A369JL45	0.00476203	2.13124
A0A369JCT1	0.621579	1.03903	A0A369JAS5	0.000195655	5.669	A0A369K7W0	0.0195812	2.32636
A0A369JHT4	0.00435663	1.84034	A0A369K6G7	0.706569	1.08012	A0A369JZP7	0.103714	0.757182
A0A369K912	0.00961604	0.735621	A0A369K2Y5	0.001195	0.05682	A0A369JPA1	0.00140385	0.429881
A0A369K5R2	0.00152553	3.46429	A0A369JT25	1.19465e-05	0.0979676	A0A369J5W0	0.29925	1.22005
A0A369KHD3	0.00352797	0.271659	A0A369K9J7	0.885471	1.0526	A0A369JYB1	0.0088124	1.34899
A0A369JWM8	0.00210872	2.10899	A0A369KEM8	0.000729639	0.0322158	A0A369JWF8	0.0165953	2.64723
A0A369JYK2	0.0014894	9.9185	A0A369JSX5	0.00109624	1.75895	A0A369JDX0	0.030944	5.82293
A0A369K0Q3	0.000327586	4.92054	A0A369JVG3	0.00225465	2.68278	A0A369JUV8	0.338918	0.217813
A0A369K7G7	0.000418199	0.604942	A0A369JR19	0.000122356	0.150783	A0A369JTZ5	0.00798592	1.85468
A0A369JL47	0.0184297	24.3104	A0A369JPQ5	0.00040001	6.62989	A0A369JQM7	0.00462484	1.86234
A0A369JNG6	0.589415	0.883809	A0A369K651	1.92489e-06	4.10037	A0A369JLW7	0.197068	0.712813
A0A369JS90	0.00140277	0.428714	A0A369JIS2	0.000961627	0.588315	A0A369K147	0.021315	0.759326
A0A369KE66	0.000562789	5.11243	A0A369JMM1	0.00141301	0.176248	A0A369JDU1	0.754718	1.08701
A0A369K2G0	0.00193997	1.79628	A0A369JGV4	8.59084e-05	8.9651	A0A369K912	0.00113193	0.320581
A0A369J604	0.693741	0.936424	A0A369KGB5	1.33937e-06	5.02027	A0A369JVF6	0.007662	1.92489
A0A369K1T7	0.0660808	1.16711	A0A369K4R0	8.02645e-05	0.0524654	A0A369JQY3	0.901808	0.965918
A0A369K2C9	0.021014	0.365559	A0A369JGL2	0.00107372	6.00881	A0A369JU32	0.258729	2.16537
A0A369JMN6	0.000237886	2.03531	A0A369K8U0	0.0024334	0.155778	A0A369JMN6	0.506908	0.898406
A0A369J312	0.00025378	4.07225	A0A369JXI5	0.000653886	2.99103	A0A369JGX4	0.234995	1.25323
A0A369JTG8	0.069753	0.795123	A0A369IYS2	0.00356544	2.12626	A0A369JQL3	0.541814	0.902802
A0A369JVL8	0.00130032	25.9372	A0A369IZB3	9.00358e-05	0.257755	A0A369JER3	0.13811	1.26377
A0A369JD10	0.000901015	1.94881	A0A369KA09	0.0594856	1.16593	A0A369JF14	0.00555861	0.396823
A0A369K1I4	3.61151e-05	2.92898	A0A369JTI9	0.0238389	1.57382	A0A369KBM1	0.0401903	0.691572
A0A369KCU1	0.000540178	3.29855	A0A369JHN1	0.000961687	0.0392791	A0A369JVF9	0.232367	0.716906
A0A369KA55	0.00585067	18.2136	A0A369J604	0.0180095	1.29343	A0A369JQV2	0.952812	1.00794
A0A369JY97	0.000495925	32.7411	A0A369JMP7	2.79153e-06	0.310714	A0A369JS71	0.00643987	0.338147
A0A369JC01	0.230621	0.853766	A0A369JSB6	0.00264947	0.153531	A0A369JQB6	0.0120454	0.620494
A0A369JT19	0.0374834	0.762341	A0A369J8J9	8.89407e-05	14.3045	A0A369K772	0.00334727	0.456622
A0A369JW83	0.000349225	2.61319	A0A369JB79	0.00133335	0.284401	A0A369JB29	0.254868	0.768938
A0A369KIQ6	0.04461	0.520083	A0A369JT26	0.0999188	0.359446	A0A369JT49	0.150737	1.37992
A0A369K8F2	0.00333096	0.742788	A0A369KCD9	0.078683	1.43496	A0A369JCF8	0.051998	1.55867
A0A369K6J3	0.0478917	0.615402	A0A369KCU1	0.0091652	2.29377	A0A369KCD9	0.538045	1.11551
A0A369JTH1	0.321566	0.806746	A0A369JUF6	9.16902e-05	25.6282	A0A369JGZ0	0.00356273	0.635432
A0A369JN28	0.526263	0.939514	A0A369JJ70	0.00323217	0.746362	A0A369JM81	0.00248545	4.31723
A0A369J7P8	0.0010659	0.49033	A0A369J763	0.024542	0.570872	A0A369JDW7	0.00142353	2.22136
A0A369J8I9	0.00210705	3.2894	A0A369J1C8	0.000251447	0.0894386	A0A369JT54	0.0871991	1.15915
A0A369K252	0.386881	0.927916	A0A369J914	0.149832	1.37975	A0A369JA30	0.00076381	2.13141
A0A369K9K0	0.205718	1.12946	A0A369K1H0	0.113802	1.2757	A0A369K238	0.931825	0.984806
A0A369JF39	0.000255716	18.6608	A0A369JBP9	1.06468e-05	2.35551	A0A369JPD1	0.0143082	0.640666
A0A369JWV0	0.000517379	0.425196	A0A369K0J9	0.00495071	3.9589	A0A369JKD5	0.00302461	3.01193
A0A369K4N4	0.00110839	18.1341	A0A369JMC7	0.000699389	0.0879677	A0A369K2K3	0.103849	0.747148
A0A369JSX5	0.0446204	0.772899	A0A369JI27	0.000444791	0.264749	A0A369JKP0	0.0119252	2.66392
A0A369KCG7	0.00295491	6.58247	A0A369J8W6	0.13538	1.12417	A0A369KGG8	0.00510693	1.89219
A0A369K215	2.07063e-06	9.24664	A0A369JQ94	0.00871787	0.758175	A0A369JIE4	0.181203	0.670112
A0A369JT41	0.00109952	5.51737	A0A369K8Q1	0.000766628	0.232408	A0A369JM05	0.0429575	1.44322
A0A369JF66	6.42483e-05	0.548324	A0A369JV85	3.86212e-05	0.48388	A0A369JKN5	0.266534	1.22268
A0A369K7I8	0.363339	1.0534	A0A369K7P3	0.000516257	0.0425325	A0A369KAN0	0.16187	1.45448
A0A369JPR7	3.28039e-05	2.56806	A0A369JAE3	0.448581	0.918156	A0A369K7U5	0.0571471	2.59479
A0A369JFW8	0.00144184	17.4439	A0A369JBW1	0.000159209	18.9749	A0A369JMA3	0.0737632	1.92536
A0A369K024	0.000832114	3.0437	A0A369JWS2	0.00130604	0.0322255	A0A369JXL8	0.00363569	2.74213
A0A369JSJ9	0.000227698	5.39632	A0A369JUE6	6.06273e-05	0.0749814	A0A369K1R4	0.000444326	0.323716
A0A369K6E9	0.00107234	0.356715	A0A369JQ90	0.00478653	2.39493	A0A369JVD2	0.118501	1.47968
A0A369JVD1	0.0232679	14.2899	A0A369JMJ8	0.000443397	0.656784	A0A369K0F4	0.72067	0.971856
A0A369K1S0	0.000671691	66.149	A0A369J768	0.000160914	0.0773781	A0A369J7S8	0.491242	1.08597
A0A369K4L9	0.00215919	1.94404	A0A369KH52	0.0129632	0.3247	A0A369JFV3	0.0956527	1.34011
A0A369JDF8	1.44678e-05	9.86292	A0A369KA27	0.053166	0.569221	A0A369JW74	0.0016072	3.95959
A0A369K151	0.942149	0.991534	A0A369K1P7	0.0822707	0.760808	A0A369K6V9	0.00142353	0.424035
A0A369JUS3	0.00780812	0.45741	A0A369JVJ7	3.01249e-05	7.68479	A0A369KB87	0.000720524	0.550831
A0A369J1K1	0.114873	1.34722	A0A369JUK6	0.000777085	0.117675	A0A369JHZ7	0.418399	1.11298
A0A369K6K3	0.0036066	16.9371	A0A369JDK2	0.175673	0.877054	A0A369JID8	0.0761344	1.36496
A0A369K2A7	0.000117962	2.317	A0A369JF59	0.000247986	6.90312	A0A369JJM0	0.00577493	5.50813
A0A369K2W0	0.00287138	12.8684	A0A369JAK9	0.00145785	0.252397	A0A369JNY8	0.0175576	2.54892
A0A369K4H1	5.40462e-05	24.3833	A0A369JLT2	0.453491	0.934479	A0A369JTJ6	0.411339	1.21117
A0A369JV54	0.00136226	0.557026	A0A369JIZ1	9.63557e-05	0.272641	A0A369JUX2	0.746802	0.952975
A0A369JUQ1	0.00105097	2.89155	A0A369JWU9	1.34037e-05	7.12647	A0A369JK54	0.521902	1.10722
A0A369JQP3	0.00224649	0.69625	A0A369JNZ8	4.57179e-05	1.95011	A0A369K9K0	0.0112889	0.431182
A0A369K9N8	0.000479346	0.633709	A0A369K0E4	0.000278415	0.263909	A0A369KCG7	0.249135	1.73013
A0A369K773	0.0011153	3.35195	A0A369K4B6	0.491511	1.09248	A0A369JKC6	0.242915	1.18089
A0A369J7Z8	0.959323	1.00403	A0A369K982	0.00027809	3.48234	A0A369JW23	0.00344029	0.682425
A0A369K3Q2	0.000226348	5.0356	A0A369JCF4	0.000416285	0.0573158	A0A369KA45	0.991878	0.998631
A0A369JSH7	0.0181789	1.65641	A0A369JHU7	3.19649e-05	0.0896699	A0A369JMT3	0.0906933	2.0779
A0A369KCN9	0.000120254	4.93228	A0A369JP67	0.0558965	0.71758	A0A369JWR3	0.0022351	0.407232
A0A369K791	7.53619e-05	2.09118	A0A369JI83	1.59077e-05	4.13511	A0A369JHT1	0.117887	0.88983
A0A369K885	0.00998079	5.48668	A0A369JBX3	9.87135e-05	4.14484	A0A369JGB2	0.188082	0.845318
A0A369JKU5	2.72248e-05	9.35419	A0A369JA37	0.000792562	0.529165	A0A369JLR5	0.0143082	1.33252
A0A369JVL6	0.00169895	1.56661	A0A369JTN7	0.678018	1.04065	A0A369KDR0	0.168731	0.745621
A0A369K887	0.886295	0.988342	A0A369K8U3	0.0904266	0.874208	A0A369JU80	0.12223	0.795582
A0A369KAA9	0.000127954	20.6723	A0A369JSH7	0.00170497	1.66566	A0A369K927	0.00615411	0.269341
A0A369JHE6	0.00316264	1.68188	A0A369J8G0	0.00361937	0.0980952	A0A369K1T7	0.00419262	0.487386
A0A369K0F5	0.0449693	1.64934	A0A369JGK3	0.406667	0.899765	A0A369J6R4	0.15833	1.71692
A0A369JR54	0.000268941	0.330308	A0A369K2J4	0.00130088	0.245133	A0A369K3A5	0.971901	1.00525
A0A369JB43	0.611284	1.02894	A0A369JTG8	0.033569	1.21107	A0A369JWZ9	0.00172565	2.56446
A0A369K9J7	0.439733	1.36972	A0A369JXQ9	0.000713334	2.21246	A0A369J8D4	0.0278028	1.78076
A0A369JK39	0.0166633	2.20921	A0A369JA46	0.000473305	0.38144	A0A369K2V7	0.303446	1.16133
A0A369J2Q1	2.07063e-06	8.00505	A0A369J5A2	0.0170401	2.24264	A0A369IZ25	0.0191899	1.48873
A0A369K8Z0	0.000347782	0.407877	A0A369K5N3	5.66124e-06	42.0463	A0A369K4X3	0.000197734	1.73585
A0A369JRI0	5.90526e-05	0.163336	A0A369J4F3	0.000621874	0.0435003	A0A369JP07	0.000228874	2.86003
A0A369JGJ3	0.000231193	6.06388	A0A369K2A7	0.000842534	1.55322	A0A369JLT0	0.007662	2.09398
A0A369K6V5	8.85899e-05	12.6892	A0A369JK29	8.68273e-06	3.31564	A0A369JSV5	0.102914	0.688502
A0A369KB87	0.00449168	1.56545	A0A369J993	0.000816707	0.0945514	A0A369JDX5	0.140672	0.776133
A0A369JXQ1	0.000576726	30.8694	A0A369J1K1	0.529926	1.10171	A0A369JSL1	0.012345	0.484745
A0A369JJG1	0.00702749	1.5501	A0A369JNM7	8.96512e-05	8.33232	A0A369KC13	0.0166852	0.423151
A0A369K427	2.62182e-05	6.22711	A0A369K8F2	0.441678	1.0913	A0A369K338	0.0401276	0.61988
A0A369K2V1	0.050552	1.37037	A0A369J7M5	2.03255e-05	12.5644	A0A369JWH5	0.000495582	2.04455
A0A369JVZ2	0.000446742	0.337014	A0A369JSI2	0.00316957	0.390968	A0A369JHY6	0.584789	1.07573
A0A369K7B8	0.000289734	14.7385	A0A369J5Z5	0.52033	0.890622	A0A369KFJ0	0.00545718	1.91643
A0A369JXN1	0.000706678	0.625943	A0A369KIQ6	0.24602	1.24462	A0A369K297	0.00363569	0.482455
A0A369K994	0.0169997	1.60636	A0A369J223	0.00157027	0.25209	A0A369KCE5	0.0215397	2.78069
A0A369JJP1	0.0011153	7.86257	A0A369JT19	0.000678547	1.34632	A0A369JZW1	0.0164059	2.57694
A0A369JLD7	0.000161256	4.73734	A0A369J8T2	0.00289821	0.316658	A0A369J8C2	0.00548755	6.28143
A0A369KA70	4.55508e-05	0.225208	A0A369K756	0.000425788	0.196649	A0A369JRW7	0.00694961	2.10878
A0A369J5I8	0.000289734	2.44298	A0A369JRN3	0.000509134	3.42803	A0A369JJ99	0.315676	1.19984
A0A369JC65	0.00267036	19.3564	A0A369J6L9	0.00206059	0.137516	A0A369J8A6	0.0949269	0.772096
A0A369K652	0.000497755	26.5409	A0A369J817	0.0131536	0.0225706	A0A369K897	0.150737	2.49591
A0A369JD79	0.0181736	7.74982	A0A369JSY8	7.30504e-05	0.0563585	A0A369J4I5	0.828235	1.04039
A0A369JX32	0.00432521	2.26469	A0A369K865	0.00819089	1.96419	A0A369JBD3	0.496139	1.11274
A0A369J537	0.00295826	1.76368	A0A369K9A5	4.78599e-05	0.220173	A0A369K994	0.000842114	0.573916
A0A369JIW7	0.570281	0.962906	A0A369JGD6	0.00217041	0.294254	A0A369JLU2	0.00049216	3.75571
A0A369K670	0.0136197	0.525232	A0A369K0R9	0.000449748	0.548044	A0A369JIN2	0.899142	1.01792
A0A369JJK1	6.60057e-05	25.7566	A0A369JZ61	8.76606e-06	2.67922	A0A369K0F5	0.0721568	0.81655
A0A369JGP9	9.66528e-05	34.1546	A0A369K290	0.000147944	0.238199	A0A369JNP8	0.0026644	1.6913
A0A369K8H0	0.000124302	24.1366	A0A369J8H2	0.000338011	8.86038	A0A369JNG1	0.00995516	1.51046
A0A369K6J6	1.12675e-06	12.57	A0A369K0R7	0.0147569	0.134386	A0A369JMG5	0.0276482	2.7098
A0A369J8A0	1.15943e-05	3.92355	A0A369JJF5	0.00021875	0.0965396	A0A369JDL5	0.00967069	9.94517
A0A369KFB3	0.227839	1.09892	A0A369K4N7	0.00103083	3.57222	A0A369J9C6	0.66304	0.916224
A0A369JN54	0.580936	0.891877	A0A369JC75	0.000147757	2.34795	A0A369JG59	0.00197384	4.26161
A0A369J2L5	0.000419018	2.41004	A0A369JUQ3	1.33937e-06	4.39756	A0A369KBH4	0.782298	0.967646
A0A369JG10	0.00340497	8.65692	A0A369JYQ3	2.91128e-05	0.115412	A0A369JJ55	0.554546	1.06295
A0A369JL46	0.0210256	0.651451	A0A369JJJ6	0.00222354	0.455773	A0A369JPR7	0.165835	1.18554
A0A369JP20	0.00017142	4.45564	A0A369K2V1	0.00901722	2.1097	A0A369JDR4	0.00188232	0.413955
A0A369JUI6	0.000284492	5.34887	A0A369KCV2	0.00332907	0.377601	A0A369KH52	0.0433602	1.88285
A0A369J3E7	0.00218408	12.6353	A0A369KDT1	3.94642e-05	0.1413	A0A369J751	0.00663208	5.42489
A0A369KBC4	0.000620747	17.3152	A0A369K379	0.00120253	3.29287	A0A369K812	0.000552591	4.35652
A0A369JAT5	0.000161826	15.1837	A0A369JUI9	0.000190875	2.60715	A0A369JBK4	0.267903	1.27865
A0A369J0T1	2.64959e-05	9.74482	A0A369JZ96	0.00927539	2.21841	A0A369JDC9	0.165835	1.26309
A0A369KBM1	0.00409731	2.35971	A0A369IYC7	8.28167e-05	8.00722	A0A369JDL9	0.00944188	0.155479
A0A369JU17	2.14761e-05	3.2731	A0A369JN52	8.70201e-05	2.06072	A0A369K981	0.184914	0.918269
A0A369K865	0.0184297	1.51441	A0A369K6I8	0.000912879	0.0907745	A0A369JV45	0.00397228	2.8984
A0A369K0F9	0.000148354	0.210518	A0A369J802	0.00019916	1.82678	A0A369J7F4	0.00106688	0.650815
A0A369JT83	6.54551e-05	0.287998	A0A369JXU0	0.122445	1.30482	A0A369JPZ0	0.364181	1.09622
A0A369JFC8	0.756809	1.03642	A0A369K032	0.00313576	0.271756	A0A369J285	0.00907026	1.71175
A0A369K927	0.153801	0.777733	A0A369K8P5	0.00909312	0.671342	A0A369K2Y5	0.00142456	3.36662
A0A369JVF3	0.00371549	1.96777	A0A369JHI9	0.00285471	0.0773608	A0A369J8L5	0.0251791	1.28961
A0A369J914	0.000215196	0.476792	A0A369JUQ2	0.000122356	16.0538	A0A369JR94	0.000552591	0.569958
A0A369KAT5	0.000618609	0.419772	A0A369JIS9	4.78599e-05	22.7121	A0A369JX03	0.0192038	0.809695
A0A369JAD7	0.0476658	1.15222	A0A369JAZ4	0.00414417	0.719376	A0A369J0G3	0.954002	1.01043
A0A369JM05	0.00280537	6.50794	A0A369J0I9	0.875794	0.975716	A0A369JIQ7	0.810677	1.03611
A0A369J7Y4	0.000933059	1.64976	A0A369JV15	6.52362e-07	4.94857	A0A369K024	0.0851813	1.48692
A0A369JTG6	7.08973e-06	4.18919	A0A369K0M8	0.0115724	0.680794	A0A369JXM0	0.190938	1.21512
A0A369K928	0.000404754	3.97002	A0A369JX32	0.0158656	1.38507	A0A369K4T8	0.840658	1.04527
A0A369JZD0	0.000195099	0.49327	A0A369JCF3	0.382338	0.840761	A0A369J624	0.952812	1.03588
A0A369JY10	0.000708683	0.526618	A0A369J6Q2	0.460214	0.936814	A0A369K9R8	0.0173215	2.66785
A0A369JII4	0.00207241	33.3813	A0A369JF44	0.000478925	0.0564023	A0A369J5L2	0.0737632	0.872135
A0A369JBP9	5.76902e-05	2.80066	A0A369JTK1	0.00120253	3.21237	A0A369K5H9	0.0914782	0.807646
A0A369K2H4	0.399799	1.08884	A0A369JUS1	0.000282975	0.358908	A0A369JSV0	0.0567755	1.35073
A0A369J097	2.27751e-06	4.56425	A0A369JBI9	0.00329706	1.65218	A0A369JR19	0.00548755	1.61121
A0A369JYQ7	0.000123417	14.5856	A0A369K7G8	0.000129299	0.146529	A0A369JSB6	0.0284557	1.77284
A0A369JBI9	0.00074518	2.1226	A0A369JTH1	0.0191266	1.36012	A0A369JVI4	0.000881501	2.4086
A0A369JCT5	0.00110839	2.28247	A0A369K0Z4	0.0490611	0.422164	A0A369J5F3	0.0441383	1.74573
A0A369K2S9	0.0422349	0.62473	A0A369JT05	0.000642173	5.79672	A0A369JYT2	0.0864897	0.783463
A0A369JKP4	0.00123661	2.61794	A0A369J565	0.808292	1.01742	A0A369JXU0	0.284138	0.806759
A0A369K7U1	0.000581673	4.75118	A0A369JHE6	0.0241004	1.27856	A0A369J9M1	0.102914	0.870269
A0A369J907	0.000317176	1.67773	A0A369JHY4	0.00107259	0.420396	A0A369J6Q4	0.0404926	1.26272
A0A369JJ82	0.11929	1.12814	A0A369JS64	0.00138252	24.3621	A0A369JMB9	0.00839779	1.62158
A0A369JKN5	8.36983e-05	4.3417	A0A369K8N2	0.00162777	1.84288	A0A369JH36	0.007662	1.27565
A0A369JG56	0.000232476	0.152898	A0A369JFT0	0.00142091	0.0813505	A0A369K8E9	0.196101	2.92938
A0A369JP34	0.00295826	7.59667	A0A369J755	2.84237e-06	2.37832	A0A369JFW8	0.000456818	7.72407
A0A369JMY5	3.41213e-05	4.28665	A0A369K3T7	0.000113799	0.223919	A0A369K9E4	0.149489	1.38014
A0A369JX42	0.00392418	0.334229	A0A369JPR2	0.0314809	0.781116	A0A369JQ54	0.00395372	5.03304
A0A369JFF8	1.427e-06	5.88855	A0A369J0H4	0.000939165	0.69769	A0A369JMA2	0.0205043	1.37916
A0A369JQD1	0.00124531	9.38002	A0A369JH94	4.78599e-05	3.6024	A0A369KA09	0.947686	0.979953
A0A369IYS2	0.00399055	2.83583	A0A369K3Y9	0.00136103	0.269859	A0A369KBJ9	0.0152051	4.19857
A0A369J802	0.000175902	4.03847	A0A369JQP3	0.526045	0.932378	A0A369JB12	0.126601	1.2245
A0A369K761	0.00025643	2.94728	A0A369JJX7	0.000314153	0.0171759	A0A369JPI3	0.0429575	1.83186
A0A369K7P4	0.906473	1.01005	A0A369J1U4	0.00310161	1.54419	A0A369J4V0	0.0083096	4.82576
A0A369JMS6	0.00327137	2.40044	A0A369KFB3	0.000362254	1.6268	A0A369J8L4	0.812546	1.06442
A0A369K7A9	0.000528645	4.27521	A0A369JPQ3	0.000404261	0.265906	A0A369JJD2	0.00453573	0.448654
A0A369K0J6	1.93776e-05	27.578	A0A369KGZ5	0.000334382	0.431172	A0A369JJ62	0.605978	1.09976
A0A369J1E2	0.00823132	1.32591	A0A369J5I8	0.00117651	1.54254	A0A369JAV4	0.888602	0.978798
A0A369JFL8	0.000285511	2.94395	A0A369J3T0	0.000523568	0.144741	A0A369K0G2	0.000627255	2.74063
A0A369K6W1	0.00504808	1.32012	A0A369K5W8	0.00226843	0.304435	A0A369JKD1	0.058956	0.576885
A0A369J5A2	0.0134089	2.68295	A0A369KAX2	0.0217156	0.421498	A0A369J8T2	0.0135555	1.96242
A0A369K497	0.000203404	20.3334	A0A369JQC7	0.0283897	0.756074	A0A369K0W1	0.000643347	5.76968
A0A369JNB0	0.00307007	2.32076	A0A369JGN0	0.0016771	0.0221279	A0A369JGW2	0.0146039	7.16608
A0A369JVG3	0.00461798	1.59006	A0A369JP58	0.0244045	0.739405	A0A369JIP0	0.409274	1.10805
A0A369JW47	0.0458865	1.17831	A0A369JNE5	2.59218e-05	0.36519	A0A369KGB5	0.0593697	1.40245
A0A369J837	0.000546593	79.0016	A0A369K2B9	0.000124774	0.0262459	A0A369JN44	0.0325957	1.29159
A0A369JV41	0.000703714	5.74141	A0A369JTM3	0.00750174	1.55512	A0A369JYF5	0.0272552	1.29286
A0A369JNZ8	0.00255254	0.503105	A0A369J5C3	0.00189316	0.576266	A0A369JYE8	0.000213072	1.55759
A0A369JQ90	0.00212835	5.1309	A0A369JS43	5.19117e-07	13.1394	A0A369JTN7	0.00510693	7.70978
A0A369K8N2	0.00646528	1.66557	A0A369K828	0.00474446	0.182375	A0A369JV11	0.89843	0.993383
A0A369J1U4	0.0022202	1.71138	A0A369K7D4	6.08318e-05	0.164713	A0A369JGY6	0.000120554	3.16994
A0A369JGG0	0.00122139	2.42972	A0A369K468	1.74213e-06	0.119477	A0A369K9J7	0.113057	1.30127
A0A369K5Q9	0.000636779	0.348342	A0A369JPH0	1.33937e-06	6.20134	A0A369JFE9	0.0620284	0.82074
A0A369JTI5	0.000498951	13.443	A0A369K529	0.000141516	0.350175	A0A369K582	0.00162885	0.564942
A0A369JJ55	0.000511351	3.52867	A0A369JI63	0.000535673	0.381324	A0A369JSV4	0.00202331	2.03642
A0A369JRW7	0.000203404	7.02207	A0A369JRV6	0.00409698	0.470151	A0A369K6G7	0.0103001	0.782131
A0A369JLZ8	0.000806089	2.74288	A0A369JW47	0.00205934	1.59787	A0A369JW83	0.419902	1.14956
A0A369JWP4	0.000437574	7.75867	A0A369JUP6	6.06273e-05	0.0334319	A0A369JSX5	0.00887886	0.439409
A0A369K0K8	0.000796244	0.517767	A0A369JJF8	0.0816259	0.702515	A0A369JT25	0.0394875	0.727876
A0A369K5C3	0.000146146	8.01542	A0A369JFF8	0.00125958	1.4363	A0A369JMS6	0.0470379	0.856174
A0A369JF26	0.00112594	21.2049	A0A369JNX3	0.0398832	0.397914	A0A369JKE6	0.00431354	11.0147
A0A369K4Q2	0.00077694	1.70305	A0A369J4J2	0.000164806	0.230488	A0A369K3N9	0.174437	1.24832
A0A369JXI5	0.000256695	2.99042	A0A369JFC8	0.0132528	1.42451	A0A369JMR3	0.0438029	3.07778
A0A369J801	0.136921	1.55492	A0A369JK92	0.000146778	2.50261	A0A369JK87	0.107567	0.767994
A0A369JKE1	9.29402e-05	9.18805	A0A369J5U9	2.09996e-07	0.05628	A0A369JIS2	0.142636	1.11361
A0A369JM94	0.00382885	0.538143	A0A369JAL1	1.26837e-06	19.4985	A0A369K791	0.214749	0.886779
A0A369J8C2	0.000222749	25.5574	A0A369JI25	0.000335107	0.0634237	A0A369K0E4	0.00735174	1.625
A0A369JAG4	0.000349777	65.7283	A0A369JHN0	0.000147757	2.1636	A0A369J8G0	0.0377639	1.74966
A0A369K0J9	0.00602918	3.31932	A0A369K6A6	0.0002039	0.143532	A0A369JIU0	0.00103857	4.66443
A0A369JUV3	4.15616e-06	18.1228	A0A369K703	0.000101224	38.0841	A0A369K155	0.007814	0.326362
A0A369JC75	0.000923002	2.16782	A0A369JN28	0.0220672	0.836881	A0A369JI83	0.0274265	1.53708
A0A369KG27	0.120385	0.845875	A0A369K433	0.0013532	0.0750347	A0A369JAE3	0.035626	1.60939
A0A369JEX3	5.89702e-05	71.8892	A0A369JFP7	0.000846517	0.188372	A0A369JL69	0.0198467	2.08413
A0A369JXX5	9.14985e-05	86.1032	A0A369J724	0.00179049	0.118547	A0A369JRN3	0.696615	0.939424
A0A369K1D6	0.153121	0.932875	A0A369JE95	0.00249576	0.123104	A0A369JPQ5	0.00202331	0.296907
A0A369KB67	0.0113577	2.27325	A0A369JVL6	0.185792	1.1157	A0A369JMC7	0.00336191	1.79047
A0A369JJQ6	0.0030337	3.26747	A0A369J7Y5	0.00078386	0.256895	A0A369J5Z5	0.232524	0.872848
A0A369KDK0	0.35073	0.910153	A0A369J7H3	3.33795e-05	3.46919	A0A369JC20	0.000517534	4.93497
A0A369JUR4	0.000110254	5.34683	A0A369JID4	7.32622e-06	1.98167	A0A369JVG3	0.0126618	0.592693
A0A369K5A8	0.000512318	27.865	A0A369KBM5	1.52107e-05	0.0537449	A0A369JSH7	0.980544	0.99445
A0A369JRN3	0.00131572	3.22037	A0A369JHC7	0.000123528	3.70461	A0A369JJ70	0.000871926	0.663642
A0A369JVP3	0.000346216	0.544669	A0A369K0L6	1.96486e-05	0.465442	A0A369J8C7	0.0126414	1.54088
A0A369JVK2	0.739303	0.946687	A0A369K7I8	0.956204	1.00318	A0A369JHN1	0.00313122	2.22705
A0A369JTK1	0.00464374	2.21705	A0A369K4Q2	0.000369632	1.67452	A0A369JUK6	0.00615411	1.84653
A0A369J9T0	0.454633	0.885999	A0A369JJD0	0.00019193	0.129267	A0A369JKE1	0.00924369	2.6176
A0A369JLF0	0.343563	1.27321	A0A369KA18	2.41115e-05	2.59919	A0A369J8J9	0.00873975	0.694621
A0A369JTM3	8.07965e-06	1.80337	A0A369K6L3	0.000447938	0.0813917	A0A369JB79	0.00156251	1.93139
A0A369JFE5	0.000288517	0.557963	A0A369JVF3	0.396408	1.07949	A0A369K0J9	0.0379082	0.838445
A0A369JXQ9	0.000265834	2.30819	A0A369KB67	0.0131389	2.03422	A0A369JB62	0.000330174	3.11513
A0A369K020	0.000376772	21.8328	A0A369KBK0	0.000335107	0.415723	A0A369KIQ6	0.0393637	0.417864
A0A369JGM9	0.0460104	2.37494	A0A369K7G7	0.00809426	0.676053	A0A369K5E4	0.00419262	1.45357
A0A369JXX7	0.00100967	0.378368	A0A369J7S7	0.000282975	3.74262	A0A369K488	0.00795296	1.99887
A0A369JHN0	9.42504e-05	2.65582	A0A369JND5	0.000623177	1.51219	A0A369KGY7	0.00146944	0.535618
A0A369JXD5	0.146059	0.873617	A0A369K562	0.000325091	0.214633	A0A369K8U0	0.122909	1.25283
A0A369JRU4	0.00212581	0.698632	A0A369JC17	0.00392355	0.107423	A0A369K2K8	0.00610545	0.667857
A0A369JY18	5.29152e-05	0.497337	A0A369JBI6	8.65176e-05	0.142946	A0A369JTK1	0.021315	0.690161
A0A369KF18	2.66849e-05	2.82491	A0A369K2T8	0.0223733	0.601598	A0A369JT26	0.859022	1.0702
A0A369JZL6	0.000679219	81.9341	A0A369JKB6	4.50371e-05	0.158602	A0A369JMW2	0.00485395	2.49041
A0A369JNB3	0.00010333	8.37443	A0A369JAD7	0.0912945	1.12992	A0A369K4R0	0.00160676	2.01774
A0A369JZ96	0.0259238	1.4976	A0A369JGQ2	4.64662e-05	4.41216	A0A369JMP7	0.0026644	4.54904
A0A369JZ61	0.000562609	1.92372	A0A369K639	0.000457789	0.181346	A0A369J7Y4	0.217261	0.835517
A0A369JN52	3.91803e-05	3.87533	A0A369JRY3	0.000388034	0.522708	A0A369JSU9	0.00504806	0.696676
A0A369K5P4	0.00232083	1.78254	A0A369JJG1	0.387496	0.920491	A0A369JCF4	0.00747174	1.45984
A0A369K9H4	3.2909e-06	6.53113	A0A369JQG1	0.00141148	1.87907	A0A369JB43	0.00183345	0.467181
A0A369KCW4	0.000320638	22.229	A0A369K188	0.00192506	1.67119	A0A369IYS2	0.0305135	1.33372
A0A369KC13	0.000512799	2.09904	A0A369JHU2	0.000147453	1.78585	A0A369JWS2	0.0166852	1.68108
A0A369JUE7	0.000284492	3.5125	A0A369K093	0.00132454	0.115487	A0A369JGS8	0.189885	0.80502
A0A369K229	4.55508e-05	2.42592	A0A369K480	1.92931e-06	1.74774	A0A369JQ90	0.00161822	2.1424
A0A369K188	0.0465811	1.21331	A0A369JUH1	0.00291655	0.265332	A0A369J6D5	0.0737632	1.19086
A0A369K582	0.00654013	2.18116	A0A369K5X4	5.23237e-06	9.19625	A0A369K651	0.268787	0.893672
A0A369JG94	0.00075406	15.8202	A0A369JS34	3.48931e-05	3.67251	A0A369J801	0.12644	0.359996
A0A369JGZ0	0.00368743	3.29429	A0A369JJQ6	0.0119915	1.62549	A0A369JMJ8	0.465673	0.915311
A0A369JQJ2	0.0132618	1.13896	A0A369JA05	7.05738e-05	2.65328	A0A369JUE6	0.0107274	1.6545
A0A369JUZ4	0.001371	0.324624	A0A369K869	0.0040799	1.59206	A0A369K8U3	0.0180568	1.24156
A0A369JDU1	6.39969e-05	5.8465	A0A369JBM2	0.000495036	0.199878	A0A369JGV4	0.714611	0.84801
A0A369JID4	0.000180743	1.53949	A0A369JPG5	0.000721056	2.4509	A0A369JWM8	0.0152765	1.70041
A0A369JY05	0.000222222	7.14947	A0A369JFC3	0.00332976	0.277485	A0A369K8F2	0.0180068	0.680643
A0A369JND5	0.000313524	1.78673	A0A369K4T3	3.33723e-05	1.95812	A0A369JHU7	0.000720524	1.53853
A0A369J531	0.082107	1.125	A0A369JFP3	0.00275839	0.239171	A0A369K8Q1	0.0449869	1.17909
A0A369J696	0.00223299	1.98879	A0A369JTF8	0.000159209	3.10899	A0A369JBX3	0.00417979	0.706934
A0A369JHU2	7.8214e-05	2.69043	A0A369JZS2	0.00177	0.134685	A0A369IXZ6	0.0121588	0.409686
A0A369J4Z3	1.37277e-05	6.33655	A0A369JCZ7	1.4893e-06	10.0893	A0A369KEM8	0.0897996	0.824952
A0A369JME9	0.263857	1.18717	A0A369JNX8	0.00171763	0.592961	A0A369JF59	0.0372419	1.44868
A0A369JP99	0.658541	1.04066	A0A369J7P3	0.00681855	0.254988	A0A369J5A2	0.102344	1.19634
A0A369J7L7	4.74947e-05	11.8446	A0A369JG99	0.00296138	2.17676	A0A369JV85	0.0143082	0.665224
A0A369JF77	0.000498951	19.8415	A0A369JFS3	1.25952e-05	0.299317	A0A369JUF6	0.0350359	0.714327
A0A369K8R3	0.0219113	1.22983	A0A369K6J3	0.0970746	0.824827	A0A369J993	0.00197384	2.70558
A0A369JBA9	0.000929575	4.74264	A0A369JWN9	0.000861857	2.12588	A0A369J763	0.0646017	0.899954
A0A369K4M7	0.000648351	6.83594	A0A369KBX4	0.00166132	2.29818	A0A369JLT2	0.00116143	1.74733
A0A369K379	5.09131e-06	2.17295	A0A369JS89	8.12875e-05	2.39673	A0A369J223	0.00364416	2.61652
A0A369J9G0	5.40462e-05	6.99499	A0A369K9N8	0.13471	0.846716	A0A369K2L9	0.000846393	3.82954
A0A369J755	1.427e-06	5.51012	A0A369KB97	0.00174747	0.190611	A0A369JA46	0.00250485	3.1997
A0A369K480	0.252009	1.66958	A0A369JPJ9	0.00200931	2.98049	A0A369JXI5	0.998336	0.999797
A0A369K1V0	2.70279e-05	18.787	A0A369JL66	0.000128507	4.16811	A0A369JI11	0.00701011	0.344846
A0A369JLG1	0.00193997	11.1302	A0A369K8R3	0.00294607	1.63761	A0A369JBP9	0.126873	1.18898
A0A369IXZ6	0.000446742	2.35559	A0A369K1G1	0.000991547	0.321592	A0A369JSY8	0.142778	1.3057
A0A369KCP8	0.185668	0.706936	A0A369K6L4	0.000939165	0.260036	A0A369J6L9	0.0146388	2.13544
A0A369K5L4	0.00250661	0.736466	A0A369JAM5	0.00170497	0.4789	A0A369J6Z5	0.149724	0.621658
A0A369JNC1	0.00311911	1.89117	A0A369J9Y1	9.22174e-06	18.2601	A0A369JTG8	0.0223642	0.656546
A0A369JDR4	0.000135737	2.33266	A0A369JF66	0.0435822	0.631805	A0A369K2J4	0.014529	1.59496
A0A369JLC1	0.00114943	2.22431	A0A369JME9	0.00141148	1.63769	A0A369JTE9	0.0083096	3.89859
A0A369K869	0.000811001	2.1866	A0A369JK39	0.422188	0.898776	A0A369JE87	0.0698749	1.35437
A0A369JI83	0.000243511	6.35602	A0A369KF41	0.00032871	2.50942	A0A369K7P3	0.00123083	6.20701
A0A369JWE2	0.00812237	1.60819	A0A369JV54	0.0169678	0.686416	A0A369JI27	0.261356	0.782738
A0A369K1B1	0.0478917	0.878313	A0A369JWV1	0.00557659	0.460504	A0A369JLD3	0.00372477	3.01704
A0A369JUI9	0.000222749	2.24274	A0A369JVF7	0.0021361	1.69363	A0A369JWU9	4.48054e-05	0.419577
A0A369JAS5	0.00068928	7.02266	A0A369JHR9	0.00436522	2.33735	A0A369JDK2	0.0543079	1.24812
A0A369K4T3	0.000102863	4.59728	A0A369K1Z7	0.00727255	0.0616395	A0A369JBW1	0.00130942	0.342387
A0A369JVP1	0.00131239	0.0642243	A0A369JIW7	0.353044	0.938774	A0A369IZB3	0.256752	1.06392
A0A369JSU9	4.07369e-06	2.84585	A0A369KF18	0.000496145	1.42501	A0A369K1P7	0.844915	0.981479
A0A369K7J9	0.620112	1.02997	A0A369J5B3	0.00128033	1.91822	A0A369J8W6	0.00401506	1.64295
A0A369K9L8	0.000164825	9.67073	A0A369K4Y3	0.000837625	6.09797	A0A369J7M5	0.345426	0.838447
A0A369J6V3	3.2909e-06	25.4892	A0A369JM86	0.000191506	0.569978	A0A369J4I9	0.861729	1.10763
A0A369J9R1	0.00320341	1.41032	A0A369JLQ7	0.000972497	0.10906	A0A369JT19	0.0121588	0.566242
A0A369JGP6	0.285694	1.09584	A0A369JFT3	0.00865724	0.0549202	A0A369K0W0	0.0019926	2.39932
A0A369K9R8	0.000169428	13.4853	A0A369JGF8	2.09996e-07	4.81481	A0A369K756	0.0045594	2.10024
A0A369JK29	0.000490472	2.68794	A0A369J6E3	1.71638e-05	2.35197	A0A369JVJ7	0.75297	0.952336
A0A369JK92	8.07965e-06	2.8104	A0A369JH98	0.000804759	0.111427	A0A369K0R9	0.00113193	12.7833
A0A369K488	4.12246e-06	9.67149	A0A369KA25	0.000460115	0.108522	A0A369JTH1	0.109849	0.593144
A0A369K382	0.000653979	0.55959	A0A369K7Y9	0.000256246	0.525907	A0A369JGK3	0.953204	0.994717
A0A369KGB5	2.07063e-06	7.04066	A0A369JVN4	0.0101989	0.411797	A0A369K2V1	0.00200724	0.649556
A0A369K2Q9	0.000512636	1.55795	A0A369JNG6	0.00252069	0.405998	A0A369K0R7	0.0935943	1.85
A0A369JIR0	5.92837e-05	68.5268	A0A369JR54	0.0184027	0.548463	A0A369J6Q2	0.119569	0.844771
A0A369KC14	5.09131e-06	0.56131	A0A369JA35	0.00032871	0.0797871	A0A369JUQ2	0.377489	0.899568
A0A369J591	0.756708	0.980715	A0A369JXN1	0.00991202	0.73974	A0A369J4F3	0.00385153	2.35374
A0A369JN97	0.00753905	0.380039	A0A369JVK2	0.523808	1.04217	A0A369K6I8	0.0276482	1.53087
A0A369K034	0.00322008	14.1989	A0A369JI40	0.000282975	1.84197	A0A369JHI9	0.14644	1.25318
A0A369K4E6	0.00310246	1.29565	A0A369K6E9	0.0533218	0.68083	A0A369K2A7	0.0143082	1.49174
A0A369KBQ2	6.46045e-05	24.7486	A0A369J7A4	0.000413394	0.0408483	A0A369JV15	0.144391	0.877736
A0A369JGX8	0.000156766	21.5574	A0A369JBZ8	0.000153956	0.183061	A0A369JGL2	0.0195827	0.391824
A0A369K4N7	0.00146038	3.1685	A0A369JX72	0.000335107	0.0540048	A0A369JKC2	0.0121588	1.87438
A0A369JU20	8.33712e-05	27.1424	A0A369JP37	1.92931e-06	2.55923	A0A369JJF5	0.0951192	1.14043
A0A369K8F1	0.366236	0.804922	A0A369JQW7	3.43292e-06	0.425078	A0A369K1H0	0.0239689	0.478955
A0A369K982	8.36983e-05	7.39108	A0A369K7J9	0.136687	1.36009	A0A369JIZ1	0.76782	0.953263
A0A369KCL0	0.000910077	33.9777	A0A369K434	2.15845e-05	2.48442	A0A369IYC7	0.906344	1.01411
A0A369K651	2.61039e-06	3.66439	A0A369K6V2	0.000247282	0.238182	A0A369JJJ6	0.00363569	2.27837
A0A369JPD1	0.00198204	6.0607	A0A369J3Y8	0.000122356	0.125475	A0A369K8P5	0.682486	1.05539
A0A369JZT9	0.0744134	1.09335	A0A369JRZ2	0.000318886	0.0205384	A0A369K5N3	0.534594	0.944194
A0A369JS89	0.000116247	2.1595	A0A369J4Q8	0.00252803	1.76834	A0A369JAL1	0.691385	1.06353
A0A369JBX3	4.98262e-05	2.93012	A0A369J5I2	0.000941639	0.023117	A0A369JUQ3	0.00723888	0.70504
A0A369JLW7	2.62182e-05	5.01069	A0A369JG67	5.9301e-06	0.127851	A0A369JNX3	0.412031	1.12625
A0A369JPK0	0.00370834	0.724125	A0A369JL46	0.0131536	0.621023	A0A369K290	0.121816	1.50366
A0A369JWR3	2.75011e-05	2.77269	A0A369JJ82	0.0558965	0.860216	A0A369K4B6	0.0074605	3.13301
A0A369JQ39	0.334534	1.09983	A0A369K4B5	0.00084798	0.0713042	A0A369JFC8	0.0960915	0.727562
A0A369KBX4	0.0432358	1.31237	A0A369JIG9	0.00368114	0.243489	A0A369J565	0.86709	1.01176
A0A369JVF7	0.00808785	1.30894	A0A369KHU0	0.000465654	0.0404304	A0A369JA37	0.0143082	1.72479
A0A369J5B3	3.10824e-05	2.09408	A0A369J580	0.0101946	1.77964	A0A369JGF2	0.107567	1.1992
A0A369JQG1	0.00392662	1.42072	A0A369K1E8	0.00157411	1.98201	A0A369K9L4	0.000888098	1.79503
A0A369KAE3	0.000136916	33.7137	A0A369JF38	1.64172e-06	0.0535599	A0A369K865	0.0141834	0.771011
A0A369JKU2	0.00387733	1.73654	A0A369JSV9	2.15845e-05	6.89142	A0A369K7G8	0.000197734	0.511543
A0A369JNP1	0.413604	0.953894	A0A369JNC1	0.0401873	1.23198	A0A369JK29	0.221804	0.810685
A0A369JUQ3	2.36332e-06	3.10046	A0A369K201	0.000605787	1.8648	A0A369JAK9	0.0142687	0.710249
A0A369JBY3	0.000829804	29.7229	A0A369JKD9	2.09996e-07	3.41579	A0A369JZ96	0.0250268	0.675079
A0A369JRP0	0.00105654	7.75348	A0A369K136	0.000312429	0.430968	A0A369JPR2	0.0177876	0.776277
A0A369JM31	1.45817e-06	12.993	A0A369K612	0.000870299	0.101814	A0A369K9A5	0.000213072	2.7355
A0A369JKN3	0.000146146	2.15308	A0A369K5R4	0.000909101	0.353736	A0A369J0I9	0.00157455	0.465132
A0A369JN96	0.000691421	0.145863	A0A369K7Q6	1.17658e-06	0.0578894	A0A369JAZ4	0.00180343	1.91809
A0A369K0C0	0.000292822	20.0011	A0A369JXD5	0.213495	1.11502	A0A369JMM1	0.947139	0.992812
A0A369KA18	0.000279605	2.13503	A0A369JEM7	0.000375409	0.0282395	A0A369J3T0	0.0182202	1.59881
A0A369J7H3	0.000498951	2.02797	A0A369JNU7	0.000915232	2.02409	A0A369JQ94	0.00100805	0.600516
A0A369JPG5	0.000542677	2.09701	A0A369K1B0	0.00287525	0.154062	A0A369JXQ9	0.617009	1.04327
A0A369K197	0.000300659	0.700667	A0A369J531	0.0355932	1.24318	A0A369JNM7	0.0192038	1.22129
A0A369JF29	0.000941376	0.246256	A0A369KBZ6	0.00206059	0.0125849	A0A369J5C3	0.352819	1.07294
A0A369J828	0.00115634	1.85764	A0A369JUZ7	5.19117e-07	3.08785	A0A369J1C8	0.00248545	2.37155
A0A369J4Q8	0.0206993	1.2837	A0A369K2I0	0.000348861	0.407135	A0A369JT05	0.000456818	0.574728
A0A369J648	5.11262e-05	6.29531	A0A369JGM4	8.7849e-05	0.201202	A0A369K0M8	0.000228874	0.535539
A0A369JG99	0.0122046	1.38443	A0A369JPY7	0.000404261	0.342006	A0A369JYQ3	0.00142456	1.878
A0A369KF41	0.000217524	2.12077	A0A369J8P1	0.000968275	0.364904	A0A369J8H2	0.000138244	0.305296
A0A369K201	7.4952e-05	2.46049	A0A369JLF0	0.24425	1.26242	A0A369K982	0.00302461	2.12245
A0A369K1E8	0.000706738	3.15283	A0A369JZT9	0.00425707	1.53513	A0A369JP58	0.0220572	1.50455
A0A369JG85	0.000585062	7.58217	A0A369IYY2	1.17658e-06	6.66081	A0A369JZ61	0.0365298	0.718017
A0A369J580	0.00191332	8.49338	A0A369J962	2.0214e-05	0.0891811	A0A369JE42	0.67709	0.962344
A0A369K2W4	0.00126508	0.732955	A0A369JSR8	0.000146687	1.80913	A0A369JUS1	0.00577419	1.12672
A0A369JKG5	0.000240649	22.9167	A0A369JAC5	0.00431505	0.375961	A0A369JP67	0.0321948	1.65842
A0A369JSR8	2.99338e-05	1.94864	A0A369JHJ9	0.00104764	0.100049	A0A369J7H3	0.0244927	0.584567
A0A369J8L4	2.5014e-05	8.85687	A0A369J8Y1	1.28579e-05	7.5844	A0A369JNZ8	0.00252978	0.257987
A0A369JV15	1.45817e-06	4.34354	A0A369K252	4.72294e-06	0.410886	A0A369K379	0.0877966	0.659896
A0A369JE50	0.000594406	0.56553	A0A369J9R1	0.00950958	1.25534	A0A369J768	0.026163	2.34338
A0A369JGV5	0.000177533	1.67305	A0A369JML8	1.79117e-05	0.307935	A0A369JJX7	0.00104736	1.96713
A0A369JD40	0.00675619	1.84077	A0A369JGV5	0.00149293	1.60219	A0A369JBI9	0.0276586	1.28473
A0A369JT59	0.00441981	0.522828	A0A369J654	1.90432e-06	0.272026	A0A369JIS9	0.00780927	0.714832
A0A369JI40	0.000115706	3.01604	A0A369KC62	0.046439	0.196412	A0A369JCF3	0.0131695	1.84848
A0A369JPQ5	0.000284492	1.96846	A0A369JAD6	0.00237999	0.388019	A0A369J604	0.187923	0.723983
A0A369K5K7	0.000258592	3.5091	A0A369JTV5	0.000125392	0.287263	A0A369KFB3	0.0160387	0.675509
A0A369IZW7	0.000941376	6.27552	A0A369K1B1	0.00687707	1.30794	A0A369J5I8	0.0149063	1.58374
A0A369K052	0.000645936	6.97482	A0A369K151	0.000110214	0.374487	A0A369J802	0.00388011	2.2107
A0A369K5V7	0.0905595	0.829789	A0A369KG27	0.01301	0.717209	A0A369K8U1	0.00124535	1.94232
A0A369JPJ9	0.00130467	2.09663	A0A369JK98	0.000354289	0.178528	A0A369JF44	0.00142353	2.44313
A0A369JNU7	0.0548041	1.17059	A0A369JKU2	0.0561941	1.1923	A0A369JRV6	0.00909724	2.67159
A0A369JH94	0.000483251	2.51379	A0A369J1T6	0.000783782	1.72688	A0A369JCS7	0.179196	1.59112
A0A369JWN9	0.00257473	1.72835	A0A369J648	0.00666282	2.03519	A0A369JC75	0.331083	0.923283
A0A369JS34	0.000149922	4.63806	A0A369JWE2	0.159352	1.15504	A0A369K4S7	0.00221454	3.01825
A0A369J6E3	2.53934e-06	2.88118	A0A369JWV0	6.12043e-05	0.423931	A0A369J0H4	0.291957	0.90648
A0A369JHR9	0.00187793	3.54226	A0A369JKN3	0.00125958	1.57197	A0A369JX32	0.0114906	1.63508
A0A369JBU0	0.00105121	1.50508	A0A369KG83	0.0174831	0.0327061	A0A369K2B9	0.00142456	1.40624
A0A369JA05	2.61039e-06	2.63146	A0A369JC01	0.000318938	0.370245	A0A369JPH0	0.106498	0.794068
A0A369K1X6	0.00130032	0.703612	A0A369JX94	5.41188e-06	0.216582	A0A369K703	0.000444326	0.291999
A0A369JGL2	0.000673814	2.35439	A0A369JYX9	0.000122356	1.76854	A0A369JS34	0.236548	1.26291
A0A369JF59	0.000135737	10.0004	A0A369JKI2	0.00132435	2.29934	A0A369KDT1	0.0016072	1.79698
A0A369KE53	0.000595894	0.320531	A0A369JI38	7.08322e-05	9.38611	A0A369JHE6	0.00954719	1.31545
A0A369K5Q5	9.17811e-05	2.21068	A0A369K197	0.00886715	1.22517	A0A369JQC7	0.158871	1.1299
A0A369J1T6	0.00806019	1.38432	A0A369JH95	2.75663e-05	1.73811	A0A369K7D4	0.00221454	1.88348
A0A369JNA1	0.056802	0.840145	A0A369J2C4	6.8434e-06	2.57414	A0A369JI25	0.00370155	1.90566
A0A369K319	0.00138284	15.6203	A0A369JNP1	0.387896	1.07833	A0A369J1K1	0.22394	1.22285
A0A369JNB1	0.0716048	1.24624	A0A369JF33	0.000563612	0.101398	A0A369JG77	0.0643086	1.65183
A0A369K9P8	0.000679219	0.340223	A0A369JWT4	2.75663e-05	4.39559	A0A369JNE5	0.578019	0.967474
A0A369JER8	0.0036066	0.851222	A0A369K1D6	0.00189794	0.743459	A0A369K3Y9	0.00183345	7.23347
A0A369JMV8	0.0032079	1.25412	A0A369J0W1	0.00225465	0.084766	A0A369K6A6	0.293801	0.84837
A0A369JKM5	0.0176978	0.798042	A0A369J8R8	0.000642173	5.83964	A0A369JGD6	0.0205391	0.665184
A0A369JKI2	0.000302495	3.04062	A0A369K5V7	0.0288043	1.35153	A0A369JHN0	0.133106	1.2275
A0A369JYX9	0.000240649	1.80498	A0A369JNA1	0.000840848	1.73622	A0A369K8N2	0.584639	0.903787
A0A369K8W7	0.0241205	0.793016	A0A369JL11	6.63874e-05	3.95318	A0A369K4N7	0.167101	0.886983
A0A369JP37	3.04191e-05	3.27239	A0A369K0G7	1.39146e-05	0.223878	A0A369JW47	0.0293572	0.737427
A0A369K2K3	9.7827e-06	9.80531	A0A369JFP4	7.05738e-05	0.328577	A0A369JMR2	0.107287	1.1998
A0A369JH95	6.17323e-06	2.35008	A0A369JA69	0.000921068	0.291464	A0A369K032	0.00163578	0.105524
A0A369KFH7	0.000390139	7.3992	A0A369JSC8	8.0914e-06	2.06538	A0A369K7I8	0.513482	1.05006
A0A369JVZ4	2.94178e-05	7.70496	A0A369J7Z8	0.00125958	0.427031	A0A369JPQ3	0.0373269	1.35994
A0A369JHC7	0.00567546	1.22634	A0A369JMD8	0.00117651	0.0411627	A0A369JUH1	0.0334394	1.49761
A0A369K434	2.62182e-05	3.52114	A0A369J8K4	2.09996e-07	14.4262	A0A369KCV2	0.291786	1.16362
A0A369JAL5	0.000247499	6.42205	A0A369JT56	4.70054e-06	0.221697	A0A369JFT3	0.0206069	3.43668
A0A369JTF8	0.000666966	1.7814	A0A369JLC5	0.00200327	0.0920414	A0A369JS64	0.000691683	0.145232
A0A369J343	2.07063e-06	7.34984	A0A369K7P4	0.00749772	0.713526	A0A369JGN0	0.00563969	5.08206
A0A369JQV2	0.000291098	13.9774	A0A369K4E6	0.463656	0.958244	A0A369JS69	0.00829715	1.7903
A0A369J7S7	0.00017142	2.61037	A0A369K4S1	0.000203394	0.110058	A0A369KA18	0.167307	0.82142
A0A369JYT6	0.000708683	42.3042	A0A369K827	0.0151898	0.187888	A0A369JUI9	0.301026	0.86023
A0A369K1U6	0.00122139	0.388169	A0A369JAL5	0.000285519	2.03349	A0A369K5W8	0.069218	1.41481
A0A369JI09	0.0129312	1.12587	A0A369JU01	0.00027554	27.8293	A0A369JN52	0.00221454	1.88057
A0A369K981	7.19558e-05	9.19024	A0A369JTU5	8.79124e-05	0.228869	A0A369J4J2	0.004042	1.48441
A0A369K7E1	0.000102863	17.9146	A0A369JGZ7	0.000404843	0.252824	A0A369K9N8	0.0291396	0.748432
A0A369KBZ4	2.14915e-05	2.03974	A0A369K7B0	9.80481e-06	18.6259	A0A369JN28	0.288455	1.12264
A0A369JZI9	0.00301364	0.408659	A0A369KBZ4	7.49627e-05	1.92882	A0A369KBM5	0.0564483	1.15866
A0A369JYY6	1.82828e-05	88.0079	A0A369K708	1.3751e-05	4.35452	A0A369J7Y5	0.37754	1.07615
A0A369JUH3	0.000327586	19.8974	A0A369JLA1	0.00175631	0.0619863	A0A369K3T7	0.00166191	3.26965
A0A369KC08	0.152248	1.11442	A0A369KHD3	7.72497e-05	0.335816	A0A369JSI2	0.15147	0.856777
A0A369K3F1	0.000542677	1.65426	A0A369K5K7	0.00141038	1.35801	A0A369JRG7	0.000157502	2.4936
A0A369JSC8	1.61366e-05	3.4967	A0A369KCP8	0.121168	0.662874	A0A369JFC3	0.0361127	1.68739
A0A369JWU9	3.89782e-05	2.9901	A0A369JAJ0	0.000725314	0.18455	A0A369JK92	0.336332	1.12299
A0A369JG77	1.12675e-06	9.7255	A0A369K3F1	0.00264958	1.58395	A0A369J755	0.000444326	2.31681
A0A369J9X4	0.000495925	0.775467	A0A369K552	0.00084246	29.8962	A0A369J1U4	0.107492	1.10828
A0A369J8L8	0.000439316	1.6333	A0A369KDK0	0.00415948	0.652434	A0A369JFF8	0.00104736	4.09981
A0A369JR16	0.283991	0.881924	A0A369J7P8	3.0278e-05	0.340166	A0A369JVN3	0.22602	1.47774
A0A369JSL1	0.000574277	7.19944	A0A369K2C9	0.000783782	0.331927	A0A369JVL6	0.0361848	1.40415
A0A369J209	1.44678e-05	15.4165	A0A369K5L4	0.0769411	0.839439	A0A369KB67	0.0564483	1.11751
A0A369KEW7	0.000923002	11.5492	A0A369J8L8	0.00719898	1.45405	A0A369KGZ5	0.56551	1.04914
A0A369K3S0	0.00111145	1.71971	A0A369KEW7	0.00511739	1.52111	A0A369K562	0.04342	1.31405
A0A369J7L9	0.00026978	8.53334	A0A369J5N3	0.000403803	0.201142	A0A369JI63	0.00789854	0.785599
A0A369JL66	2.98003e-05	4.40429	A0A369JRU4	0.0109507	0.595175	A0A369K188	0.0257001	0.726012
A0A369JT05	0.000920403	3.33153	A0A369JM94	0.00637093	0.527469	A0A369JUP6	0.000128506	3.00919
A0A369J4J8	5.00956e-05	0.582003	A0A369J9E5	0.00291707	3.4305	A0A369JS43	0.00147299	0.24309
A0A369JF09	0.484591	1.04637	A0A369K622	0.000458081	0.195591	A0A369JFP7	0.007662	1.57456
A0A369JI07	5.29152e-05	1.94346	A0A369JSC7	0.00397652	0.267729	A0A369J5U9	0.00228615	2.55716
A0A369K203	9.7827e-06	2.34012	A0A369JLC1	0.724609	0.912084	A0A369JS86	0.00197384	1.45405
A0A369JPH0	2.27751e-06	4.92428	A0A369JZD0	0.00845792	0.339878	A0A369K433	0.0120102	1.63698
A0A369JGQ2	1.46415e-05	13.4808	A0A369JUS3	0.00421208	0.322502	A0A369JZ44	0.0279633	1.59982
A0A369K5V6	0.0144223	0.625226	A0A369JBU0	0.808878	1.02612	A0A369K468	6.3034e-05	19.3203
A0A369JVJ7	4.19603e-06	7.3185	A0A369JA19	7.75763e-05	2.7982	A0A369K4Q2	0.872977	1.01704
A0A369K2K8	0.000262345	7.02642	A0A369JQ39	0.571548	1.03095	A0A369JH94	0.120806	0.69781
A0A369JUZ7	0.0029734	1.73018	A0A369JN29	3.05951e-05	0.25195	A0A369JHY4	0.0241918	1.35198
A0A369JGV4	0.000161256	7.60249	A0A369K203	4.37059e-05	1.652	A0A369JQP3	0.0418259	0.746746
A0A369IYC7	7.74183e-05	8.12023	A0A369K811	0.000468373	0.00562614	A0A369JE95	0.00634679	2.4529
A0A369JLF5	2.64959e-05	14.7502	A0A369K5Q5	0.000818183	1.40126	A0A369K5I0	0.00545718	2.25112
A0A369J2C4	0.000331386	1.31203	A0A369JN93	0.00032871	0.228359	A0A369K639	0.446411	1.06298
A0A369JKD9	2.36332e-06	2.57296	A0A369JRU0	0.00802339	0.224258	A0A369JKB6	0.000444326	4.10622
A0A369K6L6	0.00317929	1.22661	A0A369JP99	0.00421891	0.673292	A0A369JC17	0.0335239	1.7439
A0A369JB29	0.00312338	16.3662	A0A369K0K8	0.000475203	0.499418	A0A369K093	0.007662	1.81485
A0A369JNM7	9.27053e-05	10.1762	A0A369KEH5	8.57137e-05	17.3475	A0A369JS89	0.311819	0.90102
A0A369JXV9	0.000440958	1.40861	A0A369K0J1	0.00701921	0.01299	A0A369K0Z4	0.589283	1.15004
A0A369JPI3	4.12246e-06	20.0025	A0A369JVP3	0.046497	0.665017	A0A369JVF3	0.00412083	1.82286
A0A369JRN8	0.00402314	0.59033	A0A369J591	0.201032	0.913144	A0A369JJF8	0.0424476	0.687112
A0A369JMB5	0.000123417	31.388	A0A369JX42	0.00666282	0.513574	A0A369K1G1	0.00485832	2.34619
A0A369JSM1	0.00124576	2.14469	A0A369JNB1	0.00498696	1.19073	A0A369JID4	0.0083096	0.776865
A0A369JDX4	0.00010734	0.371468	A0A369JSM1	0.00019916	2.09037	A0A369K823	0.0141897	2.91759
A0A369JDR1	0.00195367	0.618304	A0A369JCQ7	0.000290287	0.0141095	A0A369K0L6	0.00100805	1.57213
A0A369JP11	0.733665	1.15918	A0A369J9N1	0.00040843	5.60153	A0A369KA27	0.0616399	1.85039
A0A369JFM9	0.000284492	185.153	A0A369K670	0.00268952	0.378702	A0A369JFT0	0.013828	1.74798
A0A369JUC6	0.000546593	0.669581	A0A369JAG2	0.00110886	0.173777	A0A369K529	0.0145215	1.38696
A0A369J8H2	0.000581673	2.70504	A0A369JXV9	0.000156297	1.84143	A0A369K4T3	0.00275391	2.3478
A0A369J5D5	0.0167904	3.93981	A0A369K8Z0	0.000122356	0.355042	A0A369KBK0	0.00180343	1.70634
A0A369K4W2	0.202533	0.907349	A0A369K9T0	7.96131e-05	0.133548	A0A369JJD0	0.893495	0.989557
A0A369J8J9	0.000137641	9.93623	A0A369J828	0.491511	0.965878	A0A369J7S7	0.00575991	0.697472
A0A369J1D5	0.0269085	0.650944	A0A369JSV3	3.77532e-05	6.0468	A0A369K2T8	0.598393	0.817885
A0A369JT17	0.000728236	0.422027	A0A369KA70	0.00132173	0.306798	A0A369JTM3	0.234995	1.15963
A0A369JWM3	7.81128e-05	1.51915	A0A369JUC6	0.000385113	1.98144	A0A369J7P3	0.0372167	1.79852
A0A369JQM2	0.000636352	0.510696	A0A369JM39	0.000422048	0.175344	A0A369K6J3	0.148127	0.746098
A0A369K2X1	0.0036009	1.56065	A0A369KAT5	0.00942745	0.337329	A0A369JHU2	0.00118192	1.50652
A0A369JZX8	2.36332e-06	96.1777	A0A369JGG2	9.00358e-05	5.64299	A0A369JIG9	0.953204	0.992236
A0A369K7B5	0.0010317	0.83556	A0A369JI07	0.00110886	1.48354	A0A369JLQ7	0.0019926	5.7302
A0A369JVD2	0.000124126	30.8388	A0A369JK75	3.7297e-06	4.9007	A0A369JHC7	0.00123763	0.331031
A0A369K2R0	0.000986861	0.49547	A0A369J7A9	0.000333658	0.0847973	A0A369K052	0.111293	1.99077
A0A369K1R4	0.024017	4.51571	A0A369JD40	0.747633	0.967867	A0A369JGQ2	0.00328378	3.05538
A0A369J9E5	0.0035894	3.81256	A0A369K8F1	0.0258753	0.749465	A0A369JBM2	0.00988402	1.56377
A0A369JGF8	0.00153889	2.20691	A0A369K6M4	0.000290287	0.273457	A0A369JZS2	0.00812567	2.3323
A0A369JA19	7.82604e-05	1.79149	A0A369K2S9	0.000298919	0.316792	A0A369KBX4	0.0071187	0.571045
A0A369J7M5	1.45817e-06	10.5346	A0A369K6D0	7.2047e-05	0.145391	A0A369K8R3	0.0105701	0.750992
A0A369JXN7	0.000138476	38.0249	A0A369J7U1	0.00110506	0.078292	A0A369JWV1	0.00415414	0.52162
A0A369K4Y3	0.000775498	5.12142	A0A369JFE5	0.00240616	0.496588	A0A369JND5	0.0278552	1.18155
A0A369K666	0.00118051	0.682763	A0A369JER8	0.0766735	0.835233	A0A369JTT5	0.00140385	1.54712
A0A369JTL1	0.00408947	0.183092	A0A369JR16	0.00832423	1.21527	A0A369JWN9	0.202107	0.813002
A0A369KC73	0.00094696	1.47127	A0A369JI09	0.0961287	1.05991	A0A369JPJ9	0.0402195	0.703453
A0A369JL11	0.000562609	2.05099	A0A369J790	0.000250648	0.0476823	A0A369K7G7	0.178552	0.894814
A0A369JWT4	1.52758e-05	2.11296	A0A369JMV8	0.912439	0.995795	A0A369JQG1	0.0623331	0.756073
A0A369K5X4	3.76078e-05	18.2557	A0A369K2Q9	0.00908563	0.611394	A0A369JTF8	0.000905583	0.572982
A0A369JTH4	0.0013179	1.31803	A0A369K354	0.000621874	0.18653	A0A369JH98	0.241327	1.10797
A0A369JPN9	0.00402314	0.734823	A0A369JXX7	0.00164136	0.452956	A0A369K5X4	0.0147137	1.98512
A0A369JM63	0.0278092	1.12682	A0A369JT59	0.00736228	0.833535	A0A369J724	0.55635	0.938698
A0A369JGA3	2.36332e-06	10.4216	A0A369KER8	2.38906e-05	6.18077	A0A369J648	0.0402109	3.09323
A0A369K7R0	0.000489318	1.6742	A0A369KC08	0.0375894	1.21439	A0A369JJG1	0.007662	1.68399
A0A369JKV9	0.0169915	0.903919	A0A369JUZ4	0.00149776	0.457572	A0A369JFS3	0.00334347	1.41843
A0A369JBW1	0.000160809	6.49678	A0A369K5Q9	0.000314153	0.34071	A0A369JPG5	0.293438	0.855608
A0A369K263	0.00108097	1.31463	A0A369K2X1	0.000587593	1.81012	A0A369K6L3	0.0601942	1.27769
A0A369K708	1.38562e-05	2.96306	A0A369J245	8.45516e-05	2.56081	A0A369KF41	0.188162	0.845122
A0A369JUQ2	9.17811e-05	14.4415	A0A369J9T0	0.00282058	0.376713	A0A369J914	0.00417979	0.345564
A0A369J8R8	0.00056798	4.02644	A0A369K2W4	0.340229	0.813051	A0A369K480	0.947659	0.955276
A0A369IYY2	4.46965e-06	2.32279	A0A369JVZ2	0.00142091	0.203489	A0A369JG99	0.00587914	0.636005
A0A369J245	0.000160809	3.73867	A0A369JTH4	4.09147e-05	1.92758	A0A369JJQ6	0.00202331	2.01014
A0A369JSV9	6.23468e-05	2.03326	A0A369JZK5	0.000108959	4.03499	A0A369JME9	0.161512	0.724904
A0A369JCZ7	1.80524e-05	6.67718	A0A369K8W7	0.0155448	0.826881	A0A369JM86	0.0182493	1.24425
A0A369JUK2	0.0783264	0.929409	A0A369JT83	0.00232415	0.263322	A0A369JRY3	0.00212281	1.61069
A0A369JE69	0.0020137	1.34413	A0A369JS90	0.000718971	0.164723	A0A369JNG6	0.00583502	2.17688
A0A369K6X7	0.000217887	0.372546	A0A369KC73	7.08322e-05	2.04081	A0A369JAM5	0.0103001	1.40593
A0A369JYS8	0.00122597	5.70281	A0A369JBD4	2.56026e-05	0.0184076	A0A369JBI6	0.000558308	1.96519
A0A369J8Y1	2.72248e-05	5.45353	A0A369K1X6	0.00113376	0.673701	A0A369JV54	0.0268669	0.811499
A0A369JUF6	7.4952e-05	18.3069	A0A369JFB3	0.000167515	0.108204	A0A369K201	0.0762562	1.31944
A0A369JS43	9.7827e-06	3.19405	A0A369JCW3	4.06396e-05	5.41199	A0A369JAD7	0.764219	1.01973
A0A369JND0	0.00782484	1.42922	A0A369K6G3	0.000270936	0.0403278	A0A369K7Y9	0.00558345	1.6579
A0A369JAL1	1.61366e-05	20.7371	A0A369JWW5	0.0950141	0.159771	A0A369J9Y1	0.000444326	0.503156
A0A369JZK5	0.000439041	3.25322	A0A369JKN9	0.000360909	0.0814981	A0A369KF18	0.000838633	1.98238
A0A369J2W3	9.42504e-05	1.66515	A0A369K3S0	0.0334791	0.874403	A0A369JHR9	0.00656203	1.5155
A0A369JIS9	4.60516e-05	16.2353	A0A369JQJ2	0.0107631	0.431911	A0A369K1Z7	0.0887591	1.58928
A0A369JS64	0.00273838	3.53816	A0A369JZI9	7.72497e-05	0.764835	A0A369JX72	0.0066368	1.39955
A0A369JQY3	5.89702e-05	52.4128	A0A369JF09	0.943887	1.00521	A0A369JIW7	0.18926	1.02571
A0A369JSV3	4.95755e-06	4.68652	A0A369J9X4	0.00367093	0.767324	A0A369JNX8	0.214749	0.889402
A0A369JK75	1.32129e-05	2.56531	A0A369KAG9	0.000804759	0.0294316	A0A369JL66	0.748389	1.05666
A0A369JGG2	6.46045e-05	3.53517	A0A369JGP6	0.00170043	0.400204	A0A369JF66	0.305092	0.86787
A0A369JCR5	0.00125216	1.48934	A0A369JG56	0.00214861	0.220361	A0A369J3Y8	0.000444326	4.68799
A0A369J9N1	0.00152895	1.60996	A0A369JLL0	0.000117726	0.0665261	A0A369JP37	0.0312908	1.27866
A0A369J7D3	0.000194249	2.80104	A0A369K866	1.39146e-05	5.09295	A0A369K7J9	0.209976	0.757285
A0A369K6D1	0.00105654	0.443717	A0A369K382	0.000651529	0.376894	A0A369JK39	0.000816146	2.45802
A0A369JI38	0.000160727	17.7478	A0A369JPK0	0.000500418	0.402122	A0A369K6L4	0.00461808	2.61218
A0A369J9Y1	1.54606e-05	9.18766	A0A369JM85	0.0105281	0.0534214	A0A369J7A4	0.000796805	2.06701
A0A369KER8	3.61151e-05	3.77087	A0A369K263	7.18673e-05	1.64333	A0A369J531	0.278965	0.904936
A0A369K6Z3	0.00132901	0.559564	A0A369JM63	0.000443397	1.47127	A0A369JCZ7	0.02031	0.661811
A0A369J3A6	3.76078e-05	1.88177	A0A369JRI0	0.000105112	0.157044	A0A369J6E3	0.0168257	1.22501
A0A369JUM6	0.000471787	169.474	A0A369JRN8	0.146332	0.896069	A0A369JRZ2	0.628216	1.1423
A0A369JCW3	5.03478e-05	5.72349	A0A369KC14	0.0016135	0.347831	A0A369JKI2	0.185691	1.32239
A0A369K5N3	1.44678e-05	39.6999	A0A369JWM3	0.318778	1.0576	A0A369JVF7	0.0127478	0.772861
A0A369K866	3.41213e-05	4.82777	A0A369JDR1	0.0208466	0.783273	A0A369JZT9	0.0189964	0.712217
A0A369K703	0.000110254	11.1205	A0A369J7D3	4.78599e-05	2.52147	A0A369JFP3	0.735585	1.04514
A0A369J8K4	7.46178e-07	5.89862	A0A369JK78	0.000416285	0.0841431	A0A369K4Y3	0.0486985	0.839856
A0A369K7B0	5.09131e-06	13.5226	A0A369K6Z3	0.000334382	3.03763	A0A369K1B1	0.00363569	0.671525
A0A369KA69	5.88873e-06	1.99475	A0A369K666	0.0179722	0.837018	A0A369K1E8	0.000922665	1.59072
A0A369KEH5	6.59539e-05	6.51739	A0A369JY18	0.000204567	0.199325	A0A369JA35	0.00944188	1.4139
A0A369JU01	0.000240649	11.2433	A0A369JPN9	0.360356	1.06178	A0A369JEM7	0.00140385	2.686
A0A369JS72	2.27751e-06	2.79395	A0A369K5V6	0.00197449	0.59997	A0A369JKT7	0.155373	0.895605
A0A369JNN0	0.000691421	7.25875	A0A369JCR5	0.000280529	2.19923	A0A369JA05	0.933614	0.991776
A0A369K552	0.000944751	15.7794	A0A369JND0	0.00142149	1.82094	A0A369J5I2	0.0132895	1.6107
A0A369K706	0.00309963	0.677288	A0A369K7B5	0.00392355	0.801166	A0A369JXN1	0.0230622	0.846165
A0A369JWX6	0.000113181	2.73349	A0A369JP11	0.979006	0.9899	A0A369JGF8	0.0204556	0.458358
A0A369JNW5	6.87692e-05	2.25745	A0A369J4J8	0.00570103	0.536739	A0A369JR54	0.0083096	0.602243
			A0A369K7R0	0.5712	1.01772	A0A369KA25	0.0177934	1.30054
			A0A369J1D5	0.0173415	0.608969	A0A369JI40	0.0153563	1.6374
			A0A369K6L6	0.100467	0.691066	A0A369K6V2	0.00100805	1.37506
			A0A369JE69	0.00118279	1.36513	A0A369K4B5	0.558981	0.959399
			A0A369KA69	3.4476e-06	4.23036	A0A369K434	0.0226842	1.41729
			A0A369K1U6	0.00106822	0.353441	A0A369JQW7	0.0278929	1.18817
			A0A369K0F9	5.19117e-07	0.110022	A0A369J817	0.245767	1.38905
			A0A369JUK2	0.0019722	1.23422	A0A369KB97	0.120264	1.30364
			A0A369JQM2	0.00447297	0.637751	A0A369JVK2	0.602688	0.908383
			A0A369JF29	0.000153956	0.227904	A0A369JNC1	0.000660582	1.53506
			A0A369JKM5	0.00456177	0.379377	A0A369K1B0	0.0239689	1.76892
			A0A369JN96	0.00294124	0.223258	A0A369JUZ7	0.0173238	0.560318
			A0A369K4W2	5.59471e-05	0.477893	A0A369KAX2	0.0244927	2.82658
			A0A369JWX6	8.39262e-07	5.66562	A0A369J5B3	0.499	1.09168
			A0A369JRV0	0.000373657	0.0397304	A0A369JVN4	0.127374	1.35529
			A0A369JDX4	0.000118941	0.472101	A0A369J4Q8	0.00161822	0.725936
			A0A369J3A6	0.00421891	1.69085	A0A369K869	0.0838515	1.37344
			A0A369JNN0	0.000553296	5.7846	A0A369J8P1	0.0518608	1.23222
			A0A369JN97	0.017786	0.215959	A0A369JF38	2.82235e-05	3.39105
			A0A369J2W3	0.00222762	1.14938	A0A369JXD5	0.0377523	0.783502
			A0A369K2R0	0.000752111	0.517564	A0A369JG67	0.00385153	1.29561
			A0A369JKV9	0.000234277	0.590488	A0A369KHU0	0.00212281	2.7606
			A0A369JT17	4.78599e-05	0.400947	A0A369JNU7	0.00372221	0.578331
			A0A369JE50	0.000625113	0.176784	A0A369JKD9	0.00336191	0.753254
			A0A369K9P8	0.000270936	0.190628	A0A369K6E9	0.0026644	0.523941
			A0A369KE53	0.000130479	0.186965	A0A369K5R4	0.00520397	1.66731
			A0A369JS72	3.7297e-06	3.07023	A0A369JHJ9	0.00213369	3.06391
			A0A369JNW5	2.05369e-05	3.4175	A0A369JL46	0.736162	1.049
			A0A369K6D1	6.63874e-05	0.606888	A0A369JAC5	0.0123411	2.16697
			A0A369JTL1	0.0105199	0.202658	A0A369JK98	0.168951	1.12455
			A0A369K6X7	0.00161172	0.282936	A0A369JBZ8	0.00172565	1.61672
			A0A369JVP1	0.00973544	0.0235027	A0A369K612	0.00839779	0.196991
			A0A369K706	0.0131389	0.477582	A0A369J962	0.000465141	1.66507
						A0A369IYY2	0.000732024	0.348725
						A0A369J580	0.000301196	4.77252
						A0A369JLF0	0.983223	1.00855
						A0A369K2I0	0.00113193	2.73115
						A0A369K136	0.113271	1.1607
						A0A369JJ82	0.00995516	1.31146
						A0A369KBZ6	0.820617	1.02782
						A0A369JPY7	0.0125003	1.46242
						A0A369JWW5	0.216199	2.54287
						A0A369JSR8	0.315343	1.07712
						A0A369K7Q6	0.999801	1.00001
						A0A369JAL5	0.00954719	3.15814
						A0A369KG27	0.0155065	1.1794
						A0A369JYX9	0.702124	1.02061
						A0A369J654	0.0106361	0.546978
						A0A369JKN3	0.0350359	1.36968
						A0A369JNA1	0.00212281	0.483893
						A0A369K1C5	0.0438721	2.00509
						A0A369JSV9	0.00252978	0.295042
						A0A369J8Y1	0.00322663	0.719045
						A0A369JAD6	0.0284643	1.47037
						A0A369K252	0.00049216	2.25833
						A0A369J0W1	0.00992794	1.89251
						A0A369J1T6	0.0512401	0.801631
						A0A369KG83	0.840802	1.05653
						A0A369JL11	0.000660582	0.518819
						A0A369JGM4	0.0613673	1.18403
						A0A369JKU2	0.0349023	1.45646
						A0A369JWT4	0.0010644	0.480699
						A0A369KC62	0.0990459	2.75554
						A0A369J8R8	0.00975173	0.689502
						A0A369J739	0.00787934	0.76602
						A0A369JSC8	0.00215697	1.693
						A0A369JTV5	0.772575	0.976032
						A0A369KCP8	0.511606	1.06647
						A0A369JWE2	0.0321531	1.39232
						A0A369J9R1	0.228509	1.12345
						A0A369JGV5	0.580334	1.04423
						A0A369JU01	0.00655976	0.404011
						A0A369JA69	0.0594791	1.20716
						A0A369JML8	0.00142456	1.4493
						A0A369JFP4	0.00117464	2.13965
						A0A369K4S1	0.00140385	2.32443
						A0A369JTU5	0.0331558	1.19536
						A0A369JWV0	0.969616	1.00298
						A0A369K5V7	0.0125047	0.613964
						A0A369K7B0	0.0547552	0.72601
						A0A369K197	0.000705337	0.571892
						A0A369JC01	0.000732024	2.30595
						A0A369JSC7	0.260805	0.837978
						A0A369JI38	0.0119252	1.89086
						A0A369J8K4	0.00143692	0.408884
						A0A369K151	0.00113193	2.64771
						A0A369JAJ0	0.0484855	1.2021
						A0A369J2C4	0.000243996	0.509695
						A0A369JUS3	0.0487535	1.41832
						A0A369K1D6	0.0083096	1.25478
						A0A369JLA1	0.0913216	1.26485
						A0A369JT56	0.00212281	0.497679
						A0A369JX94	0.000213072	2.67799
						A0A369KBZ4	0.305568	1.05751
						A0A369K2C9	0.562065	1.10132
						A0A369K3F1	0.686495	1.04439
						A0A369JH95	0.00144842	1.35208
						A0A369K0G7	0.0083096	1.69106
						A0A369K7P4	0.00675551	1.41557
						A0A369JF33	0.00328483	1.93963
						A0A369JNP1	0.21756	0.884603
						A0A369J7P8	0.0019926	1.44144
						A0A369JMD8	0.136957	1.1747
						A0A369KDK0	0.0159902	1.39501
						A0A369J7Z8	0.000704561	2.3512
						A0A369K622	0.00146944	2.73153
						A0A369JQ39	0.571147	1.06681
						A0A369K827	0.125834	1.58394
						A0A369K5L4	0.150737	0.877331
						A0A369KHD3	0.111675	0.808952
						A0A369JLC1	0.104997	2.43871
						A0A369K5Q5	0.00396292	1.57764
						A0A369K552	0.000922665	0.527807
						A0A369JGZ7	0.000630503	25.6841
						A0A369K5K7	0.000465141	2.58401
						A0A369J9E5	0.189885	1.11137
						A0A369JY92	0.0154354	3.03908
						A0A369K811	0.0135743	0.814264
						A0A369J5N3	0.00362974	1.69019
						A0A369K4E6	0.0130683	1.35211
						A0A369JM39	0.00264248	1.77324
						A0A369K0K8	0.602012	1.03674
						A0A369JCQ7	0.000912605	2.61902
						A0A369JN29	0.0057299	1.32057
						A0A369J591	0.109849	1.074
						A0A369JVP3	0.158879	0.81903
						A0A369JNB1	0.696615	1.04662
						A0A369JBU0	0.0530038	1.46677
						A0A369JM94	0.84698	1.02024
						A0A369JA19	0.00169144	0.640232
						A0A369K203	0.00180343	1.41654
						A0A369KEW7	0.00458182	7.5926
						A0A369KEH5	0.000707646	0.375697
						A0A369JX42	0.0216315	0.65079
						A0A369KAT5	0.188889	1.2444
						A0A369JLC5	0.0471773	1.41971
						A0A369JRU0	0.0203354	3.12606
						A0A369K708	0.0189336	0.680457
						A0A369K670	0.0305135	1.38693
						A0A369JSM1	0.892824	1.02599
						A0A369K8Z0	0.0795708	1.14882
						A0A369JD40	0.0115634	1.90188
						A0A369JXV9	0.0130757	0.764957
						A0A369J7A9	0.000514191	3.76249
						A0A369K6M4	0.00780927	1.40659
						A0A369JSV3	0.011118	0.775042
						A0A369K9T0	0.000922665	5.67715
						A0A369J828	0.000138244	1.92327
						A0A369JRU4	0.175492	1.17383
						A0A369K0J1	0.75297	0.946302
						A0A369JN93	0.00336191	1.67941
						A0A369KA70	0.00849857	0.734061
						A0A369JAG2	0.00786829	1.82136
						A0A369K8F1	0.746272	1.07399
						A0A369JP99	0.00694709	1.54563
						A0A369JK75	0.00328378	0.523457
						A0A369K6D0	0.000508625	1.86214
						A0A369J8L8	0.343125	1.12328
						A0A369JFE5	0.151621	1.12359
						A0A369J9N1	0.000330174	0.287414
						A0A369JI07	0.0278929	1.31002
						A0A369JI09	0.036478	1.06224
						A0A369JMV8	0.0119252	1.25941
						A0A369JUC6	0.000216951	0.337926
						A0A369K2X1	0.143829	0.862178
						A0A369JGG2	0.00076381	0.626471
						A0A369JXX7	0.00142456	0.83533
						A0A369JR16	0.0725134	0.725704
						A0A369K2Q9	0.00678904	2.5482
						A0A369J7U1	0.00197384	3.41849
						A0A369K354	0.00395372	1.73144
						A0A369K2W4	0.600906	0.901487
						A0A369J9T0	0.00216971	2.35192
						A0A369KC08	0.106198	0.917686
						A0A369KC73	0.00765687	0.720923
						A0A369J790	0.00280075	1.8304
						A0A369K5Q9	0.758393	1.0224
						A0A369KER8	0.000444326	0.610097
						A0A369JZK5	0.0245919	0.806252
						A0A369J245	0.00207443	1.45996
						A0A369JUZ4	0.00858598	0.709449
						A0A369JER8	0.828028	1.01914
						A0A369K2S9	0.00283702	1.97205
						A0A369K8W7	0.597099	0.959044
						A0A369JT59	0.0148051	0.627242
						A0A369JZD0	0.0738075	1.45132
						A0A369JT83	0.336328	1.09371
						A0A369JQJ2	0.0161266	2.63702
						A0A369JBD4	0.000796805	1.46962
						A0A369JFB3	0.144278	1.09574
						A0A369JCW3	0.286175	1.05756
						A0A369JS90	0.00162885	2.60263
						A0A369JTH4	0.00317573	0.683772
						A0A369JF09	0.642051	1.04095
						A0A369K1X6	0.359839	1.0444
						A0A369JGP6	0.00128512	2.7382
						A0A369K3S0	0.00100805	1.96672
						A0A369K6G3	0.000842114	4.10968
						A0A369JZI9	0.0105389	0.53431
						A0A369JLL0	0.000128506	3.41154
						A0A369JKN9	0.000732024	2.57173
						A0A369JVZ2	0.00995516	1.65618
						A0A369K866	0.438126	0.947931
						A0A369J9X4	0.829116	1.01061
						A0A369JG56	0.00806905	0.693853
						A0A369K263	0.012267	0.799981
						A0A369K382	0.0039761	1.48474
						A0A369JWM3	0.0135555	1.43641
						A0A369JM85	0.061101	2.1687
						A0A369KC14	0.0124242	1.61374
						A0A369KAG9	0.013828	1.42415
						A0A369JRI0	0.259762	1.04006
						A0A369JM63	0.00519908	0.765883
						A0A369JPK0	0.00130942	1.80076
						A0A369JRN8	0.00709024	0.6588
						A0A369JDR1	0.0186751	0.789385
						A0A369K6Z3	0.00180343	0.184211
						A0A369JND0	0.0564483	0.784879
						A0A369J4J8	0.370405	1.08433
						A0A369J7D3	0.0474189	1.11088
						A0A369JK78	0.00200724	1.98236
						A0A369JY18	0.000912605	2.49511
						A0A369K7B5	0.331804	1.04293
						A0A369K666	0.00938941	0.815709
						A0A369K5V6	0.686495	1.0421
						A0A369JPN9	0.00432488	0.692067
						A0A369JCR5	0.000120554	0.677211
						A0A369JKM5	0.0103444	2.10356
						A0A369JP11	0.105856	1.171
						A0A369K7R0	0.000627255	1.64505
						A0A369JUK2	0.00244057	0.753033
						A0A369JE69	0.844915	0.984619
						A0A369K6L6	0.0657164	1.77496
						A0A369J1D5	0.634717	1.06893
						A0A369JN97	0.093153	1.75977
						A0A369KA69	0.000643347	0.471533
						A0A369JN96	0.00707018	0.653338
						A0A369JQM2	0.0136474	0.800777
						A0A369K0F9	0.000157502	1.91342
						A0A369JF29	0.254278	1.08053
						A0A369JDX4	0.00591684	0.786841
						A0A369JRV0	0.00419262	0.569583
						A0A369JNN0	0.0368809	1.25484
						A0A369K4W2	0.00118192	1.89865
						A0A369K1U6	0.241406	1.09826
						A0A369JWX6	0.00930853	0.48247
						A0A369K2R0	0.514075	0.957312
						A0A369J2W3	0.00221853	1.44874
						A0A369JT17	0.350474	1.05258
						A0A369JKV9	0.000607586	1.5308
						A0A369JE50	0.00184492	3.19899
						A0A369KE53	0.000242698	1.71439
						A0A369J3A6	0.425156	1.11291
						A0A369JS72	0.0945513	0.910012
						A0A369K9P8	0.000604848	1.78475
						A0A369JNW5	0.016926	0.660556
						A0A369K6D1	0.0088124	0.731135
						A0A369JTL1	0.58352	0.903457
						A0A369K6X7	0.0323762	1.31671
						A0A369JVP1	0.0410374	2.73263
						A0A369K706	0.0696497	1.41816
